# Supplementary material for: CRISPR screens identify gene targets at breast cancer risk loci
Source: Genome Biol. 2023 Mar 29;24:59. doi: 10.1186/s13059-023-02898-w (PMC10053147; doi:10.1186/s13059-023-02898-w)
Supplement: Supplementary file 5 — Additional file 5: Table S4. MAGeCK analysis from CRISPR screens. MAGeCK analysis for identification of enriched and depleted genes in CRISPR screens. [file 13059_2023_2898_MOESM5_ESM.xlsx]

## Sheet: info
Supplementary Table 4: MAGeCK analysis from CRISPR screens

## Sheet: MAGeCK_CRISPRko_2D
	HMLE			mesHMLE			B80_T17			B80_T5			K5+/K5-			K5+/K5+
Gene	Log2[Fold_Change]	POS | -Log10(FDR)	NEG | -Log10(FDR)	Log2[Fold_Change]	POS | -Log10(FDR)	NEG | -Log10(FDR)	Log2[Fold_Change]	POS | -Log10(FDR)	NEG | -Log10(FDR)	Log2[Fold_Change]	POS | -Log10(FDR)	NEG | -Log10(FDR)	Log2[Fold_Change]	POS | -Log10(FDR)	NEG | -Log10(FDR)	Log2[Fold_Change]	POS | -Log10(FDR)	NEG | -Log10(FDR)
CREBBP	1.0807	2.78252	1.30289e-06	1.8105	2.41454	1.30289e-06	-0.030614	1.30289e-06	1.30289e-06	0.16058	1.30289e-06	1.30289e-06	-0.046974	0.00705257	1.30289e-06	2.2891	3.34679	1.30289e-06
SMAD4	0.70347	0.825138	1.30289e-06	3.8246	3.20831	1.30289e-06	1.179	1.6426	1.30289e-06	0.79049	0.616486	1.30289e-06	1.5579	3.15058	1.30289e-06	1.8104	2.75252	1.30289e-06
PTEN	0.41889	0.00370684	1.30289e-06	2.1762	3.20831	1.30289e-06	0.37965	0.0401895	1.30289e-06	1.4187	2.60642	1.30289e-06	0.9719	0.54327	1.30289e-06	0.64477	0.12733	1.30289e-06
NF1	-0.57035	1.30289e-06	1.30289e-06	1.9043	3.20831	1.30289e-06	0.18815	0.00868973	1.30289e-06	1.1123	1.17824	1.30289e-06	1.242	3.15058	1.30289e-06	0.80239	0.868831	1.30289e-06
TGFBR2	0.63757	0.602597	1.30289e-06	3.8624	3.20831	1.30289e-06	0.9943	1.79347	1.30289e-06	0.33266	0.242828	1.30289e-06	0.82767	0.423603	1.30289e-06	0.87644	0.589508	1.30289e-06
GSK3B	0.77861	0.532663	1.30289e-06	1.9058	3.20831	1.30289e-06	0.27601	0.00814156	1.30289e-06	0.5697	0.248386	1.30289e-06	0.42028	1.30289e-06	1.30289e-06	1.1449	2.36754	1.30289e-06
RIC8A	0.04418	1.30289e-06	1.30289e-06	2.831	3.20831	1.30289e-06	0.92419	0.429623	1.30289e-06	-0.94737	1.30289e-06	0.804848	-0.089084	1.30289e-06	1.30289e-06	2.1263	3.34679	1.30289e-06
NF2	-0.43779	1.30289e-06	1.30289e-06	3.2086	3.20831	1.30289e-06	0.0080615	1.30289e-06	1.30289e-06	0.6232	0.00769175	1.30289e-06	2.5125	3.15058	1.30289e-06	3.6691	3.34679	1.30289e-06
CDKN2A	0.58295	0.304336	1.30289e-06	1.4139	2.30539	1.30289e-06	0.24775	1.30289e-06	1.30289e-06	0.59721	0.397627	1.30289e-06	0.28999	0.0502802	1.30289e-06	0.65443	0.341997	1.30289e-06
CMTR2	0.13878	0.00855152	1.30289e-06	1.2886	2.30539	1.30289e-06	-0.28452	1.30289e-06	0.0147932	0.1991	0.0112908	1.30289e-06	0.86565	1.02281	1.30289e-06	0.92067	0.846389	1.30289e-06
CUL5	0.19179	0.218692	1.30289e-06	1.912	1.55846	1.30289e-06	0.36577	0.0985253	1.30289e-06	0.65743	0.482391	1.30289e-06	0.92819	0.296282	1.30289e-06	-0.6372	1.30289e-06	1.55136
APH1A	0.29946	1.30289e-06	1.30289e-06	1.4662	1.53281	1.30289e-06	0.45857	0.00534637	1.30289e-06	-0.12469	1.30289e-06	1.30289e-06	-0.4636	1.30289e-06	0.0320839	0.95574	0.875098	1.30289e-06
MLLT10	0.24568	1.30289e-06	1.30289e-06	1.4738	1.53241	1.30289e-06	0.44924	0.0812506	1.30289e-06	0.37335	0.0675836	1.30289e-06	0.5485	0.151932	1.30289e-06	-0.22235	1.30289e-06	1.30289e-06
C22orf31	0.18499	1.30289e-06	1.30289e-06	1.0614	1.44401	1.30289e-06	0.43805	0.0799644	1.30289e-06	-0.21698	1.30289e-06	1.30289e-06	0.26631	0.0194803	1.30289e-06	0.19287	0.026505	1.30289e-06
RB1	0.60554	0.825138	1.30289e-06	1.0936	1.43889	1.30289e-06	0.13821	1.30289e-06	1.30289e-06	0.43922	0.318562	1.30289e-06	0.57156	0.485349	1.30289e-06	0.22172	0.442944	1.30289e-06
RP11-57H14.2	0.41155	1.2542	1.30289e-06	1.1071	1.25312	1.30289e-06	0.70162	0.429623	1.30289e-06	0.56505	0.584875	1.30289e-06	0.47304	0.689175	1.30289e-06	0.051951	0.846389	1.30289e-06
TP53	1.3509	2.78252	1.30289e-06	1.1647	0.605067	1.30289e-06	-1.7125	1.30289e-06	2.37417	-1.9274	1.30289e-06	2.05705	0.37221	0.0682168	1.30289e-06	0.031527	1.30289e-06	1.30289e-06
DHX29	0.63607	0.825138	1.30289e-06	-0.0013395	1.30289e-06	1.30289e-06	1.5638	2.78252	1.30289e-06	-1.3189	1.30289e-06	2.14309	1.5514	3.15058	1.30289e-06	1.7691	3.34679	1.30289e-06
ATF7IP	0.38171	0.0351146	1.30289e-06	0.16292	1.30289e-06	1.30289e-06	2.2683	2.78252	1.30289e-06	0.028953	1.30289e-06	1.30289e-06	0.48079	0.296282	1.30289e-06	0.27916	0.026505	1.30289e-06
COIL	0.18331	0.0303656	1.30289e-06	0.89082	1.44129	1.30289e-06	0.31642	0.181484	1.30289e-06	0.13145	0.0507916	1.30289e-06	-0.098622	1.30289e-06	1.30289e-06	0.16401	0.0115298	1.30289e-06
RP1-5O6.5	0.54926	1.06055	1.30289e-06	0.93557	1.2358	1.30289e-06	0.52576	0.520615	1.30289e-06	0.35498	0.098351	1.30289e-06	0.47191	0.373624	1.30289e-06	0.30284	0.143507	1.30289e-06
LPAR2	0.26584	0.139997	1.30289e-06	1.7939	0.992538	1.30289e-06	0.7902	0.183374	1.30289e-06	0.36613	1.30289e-06	1.30289e-06	0.89298	1.10605	1.30289e-06	2.3813	3.34679	1.30289e-06
PLPBP	0.31323	0.218692	1.30289e-06	0.91068	0.977262	1.30289e-06	0.80416	0.575156	1.30289e-06	0.10975	0.144646	1.30289e-06	0.60661	0.309082	1.30289e-06	0.71342	1.12327	1.30289e-06
CORO7-PAM16	0.50364	0.220867	1.30289e-06	1.0274	0.87472	1.30289e-06	0.54928	0.181484	1.30289e-06	-0.17517	1.30289e-06	0.00391145	0.52418	0.296282	1.30289e-06	0.019211	0.201685	1.30289e-06
DYDC2	0.19259	1.30289e-06	1.30289e-06	1.2742	0.80794	1.30289e-06	0.19583	1.30289e-06	1.30289e-06	0.59418	0.417815	1.30289e-06	-0.063638	1.30289e-06	1.30289e-06	0.4326	0.026505	1.30289e-06
GALNT16	0.58268	0.359176	1.30289e-06	1.4958	0.760293	1.30289e-06	-0.16257	1.30289e-06	1.30289e-06	-0.38419	1.30289e-06	0.249894	0.32967	0.0194803	1.30289e-06	0.14871	1.30289e-06	1.30289e-06
IL6ST	-0.027731	0.00370684	1.30289e-06	0.95269	0.760293	1.30289e-06	-0.4627	1.30289e-06	0.936903	-0.39115	1.30289e-06	0.294197	-0.21109	1.30289e-06	0.144162	-0.29303	1.30289e-06	0.241338
ATXN7	0.33751	0.272139	1.30289e-06	1.0757	0.759853	1.30289e-06	0.52459	0.183374	1.30289e-06	0.52095	1.0231	1.30289e-06	1.2641	3.15058	1.30289e-06	1.3965	2.78252	1.30289e-06
RP11-162J8.3	0.25637	0.014336	1.30289e-06	0.80218	0.753088	1.30289e-06	0.35503	0.0905986	1.30289e-06	0.36582	0.361173	1.30289e-06	0.34561	0.0372837	1.30289e-06	0.47993	0.429147	1.30289e-06
CTC-436K13.1	0.64873	0.414289	1.30289e-06	0.91159	0.686761	1.30289e-06	0.12785	1.30289e-06	1.30289e-06	-0.010636	1.30289e-06	1.30289e-06	0.068697	1.30289e-06	1.30289e-06	0.23156	0.026505	1.30289e-06
MIR1915	0.47497	0.220867	1.30289e-06	1.2851	0.686761	1.30289e-06	0.18461	0.00814156	1.30289e-06	0.40998	0.133387	1.30289e-06	0.36778	0.168661	1.30289e-06	0.506	0.026505	1.30289e-06
CASP8	0.15219	0.304336	1.30289e-06	0.84593	0.632946	1.30289e-06	0.6902	0.181484	1.30289e-06	0.48312	0.535101	1.30289e-06	0.10995	1.30289e-06	1.30289e-06	0.063639	1.30289e-06	1.30289e-06
RELA	0.21076	1.30289e-06	1.30289e-06	0.92858	0.614583	1.30289e-06	0.32076	0.0726358	1.30289e-06	-0.62138	1.30289e-06	0.226466	0.13634	1.30289e-06	1.30289e-06	-0.60328	0.026505	0.102565
CDYL2	0.29684	0.00855152	1.30289e-06	-0.074419	0.605067	1.30289e-06	0.43674	0.117473	1.30289e-06	0.64286	0.112326	1.30289e-06	-0.23694	1.30289e-06	1.30289e-06	0.075453	1.30289e-06	1.30289e-06
AKR1C4	0.34004	0.414289	1.30289e-06	0.7002	0.563019	1.30289e-06	0.44662	0.170481	1.30289e-06	0.61991	0.231887	1.30289e-06	0.38202	0.306714	1.30289e-06	0.37494	0.0115298	1.30289e-06
ARHGAP18	0.13169	0.0208697	1.30289e-06	0.73026	0.563019	1.30289e-06	0.30721	1.30289e-06	1.30289e-06	0.40316	0.365303	1.30289e-06	0.44228	0.168661	1.30289e-06	0.32396	0.143507	1.30289e-06
PTRF	-0.41194	1.30289e-06	0.0221914	1.1355	0.563019	1.30289e-06	0.12607	1.30289e-06	1.30289e-06	0.061555	1.30289e-06	1.30289e-06	-0.14352	1.30289e-06	1.30289e-06	0.60013	0.280295	1.30289e-06
KCTD1	0.25597	1.30289e-06	1.30289e-06	1.1201	0.547422	1.30289e-06	0.085725	1.30289e-06	1.30289e-06	0.31132	0.361173	1.30289e-06	0.33296	1.30289e-06	1.30289e-06	-0.43277	1.30289e-06	0.117909
RN7SKP155	0.25331	0.0303656	1.30289e-06	0.98348	0.537268	1.30289e-06	0.49545	0.0722361	1.30289e-06	0.49897	0.32193	1.30289e-06	0.30539	0.19962	1.30289e-06	0.12125	0.0249383	1.30289e-06
CUX1	0.25569	1.30289e-06	1.30289e-06	0.93453	0.537268	1.30289e-06	0.62379	0.181484	1.30289e-06	0.68735	0.536264	1.30289e-06	0.48818	0.196231	1.30289e-06	0.52592	0.213551	1.30289e-06
STAT5A	-0.15078	1.30289e-06	1.30289e-06	1.1255	0.537268	1.30289e-06	-0.26025	1.30289e-06	1.30289e-06	0.22326	1.30289e-06	1.30289e-06	-0.082463	1.30289e-06	1.30289e-06	-0.13012	1.30289e-06	1.30289e-06
RNF135	0.48296	0.0208697	1.30289e-06	0.91346	0.531636	1.30289e-06	0.17798	1.30289e-06	1.30289e-06	0.67314	0.318562	1.30289e-06	0.10526	1.30289e-06	1.30289e-06	-0.085662	1.30289e-06	1.30289e-06
RP11-612A1.1	0.49982	0.282661	1.30289e-06	0.72531	0.506503	1.30289e-06	0.56931	0.474042	1.30289e-06	0.39203	0.318562	1.30289e-06	0.17247	0.0194803	1.30289e-06	-0.062484	1.30289e-06	1.30289e-06
RP11-499O7.7	0.54495	0.304336	1.30289e-06	0.58764	0.467791	1.30289e-06	0.59097	0.181484	1.30289e-06	0.37211	0.584875	1.30289e-06	0.47808	0.189216	1.30289e-06	0.55549	0.0852687	1.30289e-06
RP11-353N14.4	-0.17115	1.30289e-06	1.30289e-06	0.84235	0.467791	1.30289e-06	0.23553	1.30289e-06	1.30289e-06	0.48815	0.364867	1.30289e-06	0.49025	0.108256	1.30289e-06	0.29748	0.0610712	1.30289e-06
FGF10	0.18372	0.0208697	1.30289e-06	1.3184	0.425682	1.30289e-06	0.39482	0.0726358	1.30289e-06	0.40393	1.30289e-06	1.30289e-06	0.37257	0.0776234	1.30289e-06	0.18977	1.30289e-06	1.30289e-06
AKR1C7P	0.72734	0.504045	1.30289e-06	1.08	0.41757	1.30289e-06	0.37595	0.183374	1.30289e-06	0.60983	0.536264	1.30289e-06	0.3803	0.31429	1.30289e-06	0.47013	0.127247	1.30289e-06
ZNF786	0.21831	0.148162	1.30289e-06	0.91103	0.41757	1.30289e-06	0.15386	1.30289e-06	1.30289e-06	0.42949	0.112062	1.30289e-06	0.46995	0.296282	1.30289e-06	-0.057067	1.30289e-06	1.30289e-06
ITSN2	0.35297	0.120939	1.30289e-06	0.46003	0.41757	1.30289e-06	0.53078	0.249209	1.30289e-06	0.421	0.494083	1.30289e-06	0.4039	0.358374	1.30289e-06	0.38487	0.143507	1.30289e-06
GORASP2	0.18565	1.30289e-06	1.30289e-06	0.66581	0.398478	1.30289e-06	0.3106	0.0583803	1.30289e-06	0.78948	0.837639	1.30289e-06	0.81011	0.54327	1.30289e-06	1.0754	0.868831	1.30289e-06
MAPK8IP1P2	0.019851	1.30289e-06	1.30289e-06	0.76309	0.398478	1.30289e-06	0.099683	1.30289e-06	1.30289e-06	0.1599	0.00769175	1.30289e-06	0.26477	0.0327104	1.30289e-06	0.35584	0.143507	1.30289e-06
NET1	0.71946	0.220867	1.30289e-06	1.161	0.395452	1.30289e-06	0.72286	0.429623	1.30289e-06	0.41293	0.397627	1.30289e-06	0.5816	0.246656	1.30289e-06	0.40846	0.026505	1.30289e-06
ARMC3	0.33008	0.0088373	1.30289e-06	1.1266	0.395452	1.30289e-06	0.23725	0.0518179	1.30289e-06	0.30853	0.304615	1.30289e-06	0.67393	0.423603	1.30289e-06	0.38046	0.0620009	1.30289e-06
L3MBTL3	0.27077	0.00224807	1.30289e-06	0.91622	0.395452	1.30289e-06	0.09553	1.30289e-06	1.30289e-06	0.4408	0.361173	1.30289e-06	0.35642	1.30289e-06	1.30289e-06	0.06798	0.0122341	1.30289e-06
MCUR1	0.82425	1.21899	1.30289e-06	0.86873	0.326133	1.30289e-06	0.37719	0.0812506	1.30289e-06	0.36427	1.30289e-06	1.30289e-06	0.93399	1.35759	1.30289e-06	0.54723	0.26753	1.30289e-06
OR2J2	0.50762	0.220867	1.30289e-06	0.93306	0.326133	1.30289e-06	0.56701	0.181484	1.30289e-06	0.3542	0.00470623	1.30289e-06	0.52498	0.201791	1.30289e-06	0.60461	0.349954	1.30289e-06
CTD-3193K9.4	0.41952	0.147702	1.30289e-06	1.3603	0.326133	1.30289e-06	0.027807	1.30289e-06	1.30289e-06	0.51363	0.102902	1.30289e-06	0.34519	0.0736812	1.30289e-06	0.39911	1.30289e-06	1.30289e-06
CYP2D7	0.60533	0.0351146	1.30289e-06	0.76366	0.326133	1.30289e-06	0.10388	0.0769084	1.30289e-06	0.10138	1.30289e-06	1.30289e-06	0.35117	0.0194803	1.30289e-06	0.38385	0.0295048	1.30289e-06
TET2-AS1	0.16723	1.30289e-06	1.30289e-06	0.72182	0.326133	1.30289e-06	0.70503	0.181484	1.30289e-06	-0.10881	1.30289e-06	1.30289e-06	-0.035023	1.30289e-06	1.30289e-06	0.21295	1.30289e-06	1.30289e-06
COMP	0.4861	0.0419285	1.30289e-06	1.0315	0.306752	1.30289e-06	0.55406	0.181484	1.30289e-06	0.14907	1.30289e-06	1.30289e-06	0.35817	1.30289e-06	1.30289e-06	0.048154	0.0260957	1.30289e-06
RP3-443C4.2	0.54602	0.188667	1.30289e-06	0.85852	0.299341	1.30289e-06	0.39797	0.181484	1.30289e-06	0.50537	0.584875	1.30289e-06	0.54945	0.296282	1.30289e-06	0.49502	0.213551	1.30289e-06
RP11-400F19.18	0.23838	1.30289e-06	1.30289e-06	0.56375	0.299341	1.30289e-06	0.65071	0.0726358	1.30289e-06	0.46508	1.30289e-06	1.30289e-06	0.5976	0.118833	1.30289e-06	0.45322	1.30289e-06	1.30289e-06
RP11-43F13.3	0.42029	0.106562	1.30289e-06	0.78517	0.294081	1.30289e-06	0.32234	0.0313714	1.30289e-06	0.00011487	1.30289e-06	1.30289e-06	0.45733	0.103098	1.30289e-06	0.1543	0.026505	1.30289e-06
RNF213	0.1786	0.00855152	1.30289e-06	0.74	0.293452	1.30289e-06	0.42986	0.181484	1.30289e-06	0.19469	1.30289e-06	1.30289e-06	-0.099437	0.14994	1.30289e-06	0.38561	0.415222	1.30289e-06
SLC37A3	0.64507	0.0351146	1.30289e-06	0.94792	0.282292	1.30289e-06	0.36204	1.30289e-06	1.30289e-06	0.50055	0.129816	1.30289e-06	0.3619	0.272599	1.30289e-06	0.71958	0.164868	1.30289e-06
TC2N	0.39947	0.0629643	1.30289e-06	0.83472	0.27772	1.30289e-06	0.40544	0.183374	1.30289e-06	0.16828	1.30289e-06	1.30289e-06	0.28319	1.30289e-06	1.30289e-06	0.69045	0.026505	1.30289e-06
EP300	0.62288	0.218692	1.30289e-06	1.4239	0.268922	1.30289e-06	0.2213	1.30289e-06	1.30289e-06	-0.21482	1.30289e-06	0.188098	0.70247	0.307143	1.30289e-06	2.1563	3.34679	1.30289e-06
TRIOBP	0.63664	0.0653783	1.30289e-06	0.80593	0.268922	1.30289e-06	0.37528	0.0812506	1.30289e-06	0.34369	1.30289e-06	1.30289e-06	0.56125	0.306714	1.30289e-06	0.44106	0.0212445	1.30289e-06
BMI1	0.31107	0.0458255	1.30289e-06	0.71413	0.268922	1.30289e-06	0.62822	0.429623	1.30289e-06	0.14567	1.30289e-06	1.30289e-06	0.34228	1.30289e-06	1.30289e-06	0.31823	0.297932	1.30289e-06
HOTAIRM1	0.24911	1.30289e-06	1.30289e-06	0.7478	0.264474	1.30289e-06	0.12925	1.30289e-06	1.30289e-06	0.41725	0.362337	1.30289e-06	-0.14402	1.30289e-06	1.30289e-06	-0.58301	1.30289e-06	0.0319249
RP5-1042K10.10	0.4494	0.304336	1.30289e-06	0.62391	0.244866	1.30289e-06	0.29751	0.147048	1.30289e-06	-0.21904	1.30289e-06	1.30289e-06	0.62209	0.425122	1.30289e-06	0.26017	0.0732631	1.30289e-06
MIR4757	0.5684	0.216002	1.30289e-06	0.64785	0.244866	1.30289e-06	0.72598	0.249209	1.30289e-06	0.89224	0.436898	1.30289e-06	0.78141	0.376358	1.30289e-06	0.98219	1.66075	1.30289e-06
PSMB8	0.41072	0.220867	1.30289e-06	0.93354	0.234814	1.30289e-06	0.34977	0.00207785	1.30289e-06	0.10981	1.30289e-06	1.30289e-06	0.46779	0.306714	1.30289e-06	0.90064	1.17578	1.30289e-06
TMIE	-0.25439	1.30289e-06	1.84403	0.74292	0.234814	1.30289e-06	0.092771	1.30289e-06	1.30289e-06	0.38705	0.0277643	1.30289e-06	0.25226	0.0834455	1.30289e-06	0.14869	0.0203997	1.30289e-06
TBC1D16	0.13369	1.30289e-06	1.30289e-06	1.195	0.234814	1.30289e-06	0.13577	1.30289e-06	1.30289e-06	0.27895	1.30289e-06	1.30289e-06	-0.32243	1.30289e-06	1.30289e-06	-0.13765	1.30289e-06	1.30289e-06
RP11-356O9.2	0.58745	0.359176	1.30289e-06	1.0773	0.231221	1.30289e-06	0.34062	1.30289e-06	1.30289e-06	0.37492	0.252298	1.30289e-06	0.51664	0.145425	1.30289e-06	0.41732	0.143507	1.30289e-06
FLI1	0.43029	0.0653783	1.30289e-06	0.16707	0.231221	1.30289e-06	0.2696	0.181484	1.30289e-06	0.85688	1.10512	1.30289e-06	1.2039	1.65655	1.30289e-06	0.51466	0.0389754	1.30289e-06
CREB5	0.2059	0.00224807	1.30289e-06	0.19184	0.231221	1.30289e-06	0.070502	1.30289e-06	1.30289e-06	0.40903	0.318562	1.30289e-06	0.11895	1.30289e-06	1.30289e-06	0.070545	1.30289e-06	1.30289e-06
STAT5B	0.071742	1.30289e-06	1.30289e-06	0.448	0.231221	1.30289e-06	0.34043	0.0332666	1.30289e-06	0.22094	0.0602442	1.30289e-06	0.025596	1.30289e-06	1.30289e-06	-0.078469	1.30289e-06	1.30289e-06
SNTN	-0.19038	1.30289e-06	1.30289e-06	0.82308	0.231221	1.30289e-06	0.3667	0.000328016	1.30289e-06	0.19232	1.30289e-06	1.30289e-06	0.17268	1.30289e-06	1.30289e-06	0.35121	0.0723125	1.30289e-06
RP11-81F13.1	0.1494	1.30289e-06	1.30289e-06	0.7561	0.231221	1.30289e-06	0.15983	1.30289e-06	1.30289e-06	0.59568	0.158862	1.30289e-06	0.40803	0.0489599	1.30289e-06	-0.01754	1.30289e-06	1.30289e-06
RP11-108B14.5	0.46992	0.220867	1.30289e-06	0.73193	0.207484	1.30289e-06	0.5431	0.181484	1.30289e-06	0.49505	0.482391	1.30289e-06	0.55283	0.338128	1.30289e-06	0.80049	0.341997	1.30289e-06
MIR1289-2	0.61011	0.220867	1.30289e-06	1.0666	0.207484	1.30289e-06	0.099972	1.30289e-06	1.30289e-06	0.15169	1.30289e-06	1.30289e-06	0.20078	0.05039	1.30289e-06	0.20712	1.30289e-06	1.30289e-06
SFMBT2	0.51255	0.0653783	1.30289e-06	0.93959	0.207484	1.30289e-06	0.0036075	1.30289e-06	1.30289e-06	0.29216	0.034188	1.30289e-06	0.22384	1.30289e-06	1.30289e-06	0.35388	0.0234368	1.30289e-06
RNU6-1206P	0.28039	0.0351146	1.30289e-06	0.70692	0.207484	1.30289e-06	0.26626	0.0566777	1.30289e-06	0.70038	0.42798	1.30289e-06	0.18787	0.0194803	1.30289e-06	0.05259	0.0859876	1.30289e-06
PLEKHS1	0.073099	1.30289e-06	1.30289e-06	0.79264	0.207484	1.30289e-06	0.1194	0.183374	1.30289e-06	0.61345	0.361173	1.30289e-06	0.26312	1.30289e-06	1.30289e-06	-0.13894	0.327585	1.30289e-06
RP11-556I14.1	0.25153	1.30289e-06	1.30289e-06	0.51479	0.207484	1.30289e-06	0.47104	0.181484	1.30289e-06	0.096919	1.30289e-06	1.30289e-06	0.17416	0.00705257	1.30289e-06	0.15253	1.30289e-06	1.30289e-06
RP11-58A18.1	0.33868	1.30289e-06	1.30289e-06	-0.058849	0.207484	1.30289e-06	0.23732	0.0313714	1.30289e-06	0.33778	0.0500078	1.30289e-06	-0.021381	1.30289e-06	1.30289e-06	0.19862	0.00645444	1.30289e-06
TCAF1	0.49334	0.414289	1.30289e-06	0.6868	0.205624	1.30289e-06	0.33676	0.0726358	1.30289e-06	0.61665	0.362337	1.30289e-06	0.55662	0.145425	1.30289e-06	0.36664	0.15582	1.30289e-06
APOC1	0.49545	0.304336	1.30289e-06	0.91739	0.205624	1.30289e-06	0.54471	0.181484	1.30289e-06	0.82422	0.568676	1.30289e-06	0.5533	0.145425	1.30289e-06	0.51197	0.645158	1.30289e-06
CLPTM1L	0.46255	0.22469	1.30289e-06	0.44048	0.205624	1.30289e-06	0.3337	0.0518179	1.30289e-06	0.41902	0.318562	1.30289e-06	0.2158	1.30289e-06	1.30289e-06	0.0043448	1.30289e-06	1.30289e-06
AC008073.9	0.38646	0.220867	1.30289e-06	0.44667	0.205624	1.30289e-06	0.067223	1.30289e-06	1.30289e-06	0.33771	0.280495	1.30289e-06	0.14757	0.0458197	1.30289e-06	0.13517	1.30289e-06	1.30289e-06
RP11-661C8.3	0.43304	0.145205	1.30289e-06	0.79862	0.205624	1.30289e-06	-0.010337	1.30289e-06	1.30289e-06	-0.082113	0.0675836	1.30289e-06	0.60936	0.178941	1.30289e-06	0.1897	0.0859876	1.30289e-06
RP11-739N10.1	0.20563	0.0888131	1.30289e-06	0.75035	0.205624	1.30289e-06	0.50932	0.181484	1.30289e-06	0.47303	0.0766285	1.30289e-06	0.20591	0.0168452	1.30289e-06	0.46085	0.110801	1.30289e-06
EZH1	0.43132	0.0697383	1.30289e-06	0.74517	0.205624	1.30289e-06	0.65176	0.0726358	1.30289e-06	0.69614	0.417453	1.30289e-06	0.24295	1.30289e-06	1.30289e-06	0.47391	0.026505	1.30289e-06
RP11-18H7.1	0.48352	0.0653783	1.30289e-06	0.65236	0.205624	1.30289e-06	0.56317	0.181484	1.30289e-06	0.28979	0.189872	1.30289e-06	0.358	0.306714	1.30289e-06	0.55753	0.297932	1.30289e-06
CLIP4	0.52076	0.0419285	1.30289e-06	0.51054	0.205624	1.30289e-06	0.40875	0.161539	1.30289e-06	0.63326	0.583335	1.30289e-06	0.69633	0.206523	1.30289e-06	0.2459	0.026505	1.30289e-06
RP11-360F5.3	0.42662	0.00855152	1.30289e-06	0.3149	0.205624	1.30289e-06	0.4081	0.0783806	1.30289e-06	0.60355	0.115989	1.30289e-06	0.80342	0.423603	1.30289e-06	-0.038768	1.30289e-06	1.30289e-06
RP11-57J16.1	0.1307	0.00224807	1.30289e-06	1.0771	0.205624	1.30289e-06	0.086979	1.30289e-06	1.30289e-06	0.66301	0.192234	1.30289e-06	0.28584	1.30289e-06	1.30289e-06	0.32499	1.30289e-06	1.30289e-06
HCRT	-0.038168	1.30289e-06	1.30289e-06	0.69925	0.205624	1.30289e-06	0.36819	0.0518179	1.30289e-06	0.01564	1.30289e-06	1.30289e-06	0.70322	0.0918411	1.30289e-06	0.54972	0.0494589	1.30289e-06
NKX2-8	0.2806	1.30289e-06	1.30289e-06	1.0894	0.205624	1.30289e-06	0.37493	0.0301966	1.30289e-06	0.38248	1.30289e-06	1.30289e-06	0.49214	0.358374	1.30289e-06	0.18343	1.30289e-06	1.30289e-06
TMEM136	0.20642	1.30289e-06	1.30289e-06	0.73515	0.205624	1.30289e-06	0.38926	1.30289e-06	1.30289e-06	0.31194	0.376045	1.30289e-06	0.031448	1.30289e-06	1.30289e-06	0.13776	1.30289e-06	1.30289e-06
RP11-175K6.1	-0.090019	1.30289e-06	1.30289e-06	0.71851	0.205624	1.30289e-06	-0.017275	1.30289e-06	1.30289e-06	0.4068	1.30289e-06	1.30289e-06	0.01011	1.30289e-06	1.30289e-06	0.097916	1.30289e-06	1.30289e-06
CSNK1E	-0.099517	1.30289e-06	1.30289e-06	0.87541	0.196286	1.30289e-06	0.11667	1.30289e-06	1.30289e-06	-0.52202	0.176994	1.30289e-06	0.033019	0.0194803	1.30289e-06	-0.27997	1.30289e-06	1.30289e-06
RP11-556I14.2	0.22613	1.30289e-06	1.30289e-06	0.83794	0.196286	1.30289e-06	0.14962	1.30289e-06	1.30289e-06	0.10419	1.30289e-06	1.30289e-06	0.4448	0.0442863	1.30289e-06	0.00010002	1.30289e-06	1.30289e-06
ANKFN1	0.2519	1.30289e-06	1.30289e-06	0.62592	0.194954	1.30289e-06	0.20862	0.181484	1.30289e-06	0.58699	0.584875	1.30289e-06	0.28808	0.12216	1.30289e-06	0.22025	0.026505	1.30289e-06
DCAF17	0.22278	0.00855152	1.30289e-06	0.60255	0.194921	1.30289e-06	0.13447	1.30289e-06	1.30289e-06	0.36748	0.198703	1.30289e-06	0.17457	1.30289e-06	1.30289e-06	0.076366	1.30289e-06	1.30289e-06
SLC6A3	0.63278	0.220867	1.30289e-06	1.011	0.194419	1.30289e-06	0.52148	0.175627	1.30289e-06	0.17255	0.00769175	1.30289e-06	0.54011	0.0194803	1.30289e-06	0.45443	0.133685	1.30289e-06
MYCT1	0.27673	1.30289e-06	1.30289e-06	0.49109	0.194419	1.30289e-06	0.30698	0.0313714	1.30289e-06	0.43188	0.32193	1.30289e-06	0.43952	0.151024	1.30289e-06	0.35703	0.112548	1.30289e-06
DCAKD	-0.39598	1.30289e-06	0.247312	0.47739	0.191316	1.30289e-06	0.078415	1.30289e-06	1.30289e-06	0.0089214	1.30289e-06	1.30289e-06	0.24491	1.30289e-06	1.30289e-06	0.12228	1.30289e-06	1.30289e-06
CTB-113D17.1	0.0059545	1.30289e-06	1.30289e-06	0.43328	0.190589	1.30289e-06	0.47361	0.0812506	1.30289e-06	0.57839	0.405581	1.30289e-06	0.25286	0.0109125	1.30289e-06	0.57228	0.0630512	1.30289e-06
RP1-85F18.6	0.60057	0.282661	1.30289e-06	1.1779	0.187084	1.30289e-06	0.51489	0.0726358	1.30289e-06	-0.28415	1.30289e-06	0.713258	0.29022	0.0776234	1.30289e-06	0.35207	0.143507	1.30289e-06
RP11-860B13.1	0.59756	0.147702	1.30289e-06	0.82137	0.187084	1.30289e-06	0.82842	0.0518179	1.30289e-06	0.11543	1.30289e-06	1.30289e-06	0.3137	0.19962	1.30289e-06	0.73273	0.0389754	1.30289e-06
RP11-318I4.1	0.68625	0.0653783	1.30289e-06	0.83585	0.187084	1.30289e-06	0.58421	0.0769084	1.30289e-06	0.28233	1.30289e-06	1.30289e-06	0.19397	1.30289e-06	1.30289e-06	-0.092315	0.0721853	1.30289e-06
AC010136.2	0.59402	0.218692	1.30289e-06	0.74263	0.186024	1.30289e-06	0.89343	0.249209	1.30289e-06	0.67343	0.584875	1.30289e-06	0.56969	0.127388	1.30289e-06	0.58778	0.120972	1.30289e-06
SLC25A13	0.21128	0.106562	1.30289e-06	0.77366	0.186024	1.30289e-06	0.56076	0.106372	1.30289e-06	0.12416	1.30289e-06	1.30289e-06	0.13974	0.0462364	1.30289e-06	0.17798	0.026505	1.30289e-06
METTL8	0.43709	0.0653783	1.30289e-06	0.24818	0.186024	1.30289e-06	0.21005	0.131909	1.30289e-06	0.54999	0.42861	1.30289e-06	0.44373	0.272599	1.30289e-06	0.22235	0.143507	1.30289e-06
PNPLA2	0.46983	0.0351146	1.30289e-06	0.51568	0.186024	1.30289e-06	-0.029379	1.30289e-06	1.30289e-06	0.072359	1.30289e-06	1.30289e-06	0.021307	1.30289e-06	1.30289e-06	0.17852	1.30289e-06	1.30289e-06
CTD-2116F7.1	-0.17258	1.30289e-06	1.30289e-06	0.40714	0.186024	1.30289e-06	-0.15411	0.00868973	1.30289e-06	0.13021	0.00470623	1.30289e-06	0.1942	0.00705257	1.30289e-06	-0.01647	0.0203997	1.30289e-06
RNF7	0.14193	1.30289e-06	1.30289e-06	1.4073	0.186024	1.30289e-06	0.091206	1.30289e-06	1.30289e-06	0.58998	0.405581	1.30289e-06	1.2414	0.900157	1.30289e-06	-0.2419	1.30289e-06	1.30289e-06
RP11-134D3.1	0.27178	0.0351146	1.30289e-06	0.85532	0.183858	1.30289e-06	0.33507	1.30289e-06	1.30289e-06	0.31	0.0936493	1.30289e-06	-0.093547	0.0271545	1.30289e-06	-0.34888	1.30289e-06	1.30289e-06
RP11-669E14.6	0.35463	0.0208697	1.30289e-06	0.70886	0.183858	1.30289e-06	0.27024	0.0313714	1.30289e-06	0.24887	0.00634998	1.30289e-06	0.23471	0.108256	1.30289e-06	-0.37184	0.026505	0.00123689
C2orf70	0.33308	1.30289e-06	1.30289e-06	0.50182	0.183858	1.30289e-06	0.22705	1.30289e-06	1.30289e-06	0.04541	1.30289e-06	1.30289e-06	0.088662	1.30289e-06	1.30289e-06	0.29929	0.0494589	1.30289e-06
VASN	0.2471	1.30289e-06	1.30289e-06	0.86459	0.183858	1.30289e-06	-0.23672	1.30289e-06	1.30289e-06	-0.44393	1.30289e-06	0.0495461	0.27408	0.0194803	1.30289e-06	0.075544	1.30289e-06	1.30289e-06
C17orf53	-0.089279	1.30289e-06	1.30289e-06	0.49455	0.183858	1.30289e-06	0.064231	1.30289e-06	1.30289e-06	0.13489	1.30289e-06	1.30289e-06	-0.25435	1.30289e-06	0.42747	-0.34956	1.30289e-06	1.11549
FAM149B1	-0.1849	1.30289e-06	0.143614	-0.078822	0.183858	1.30289e-06	-0.14863	1.30289e-06	1.30289e-06	0.17197	1.30289e-06	1.30289e-06	-0.10269	1.30289e-06	1.30289e-06	-0.13415	1.30289e-06	1.30289e-06
CCDC103	0.25055	0.00335876	1.30289e-06	0.65698	0.18358	1.30289e-06	0.35779	0.0812506	1.30289e-06	0.36916	0.318562	1.30289e-06	0.14525	1.30289e-06	1.30289e-06	0.33247	1.30289e-06	1.30289e-06
PHLDA3	0.019724	1.30289e-06	1.30289e-06	-0.16134	0.18358	1.30289e-06	0.16668	0.0394969	1.30289e-06	0.38152	0.0946538	1.30289e-06	0.81507	0.689175	1.30289e-06	0.43324	0.0859876	1.30289e-06
TXNIP	0.18836	1.30289e-06	1.30289e-06	-0.059077	0.18358	1.30289e-06	-0.063285	1.30289e-06	1.30289e-06	0.56951	0.085751	1.30289e-06	0.51204	0.119473	1.30289e-06	0.27839	0.0537605	1.30289e-06
CNTNAP1	-0.20917	1.30289e-06	1.30289e-06	0.57599	0.18358	1.30289e-06	0.19579	1.30289e-06	1.30289e-06	0.040248	1.30289e-06	1.30289e-06	-0.048718	1.30289e-06	1.30289e-06	-0.20621	1.30289e-06	1.30289e-06
RP11-554I8.2	-0.029086	1.30289e-06	1.30289e-06	0.42661	0.183198	1.30289e-06	0.80255	0.115506	1.30289e-06	0.41307	0.00250178	1.30289e-06	-0.034772	1.30289e-06	1.30289e-06	-0.041066	1.30289e-06	1.30289e-06
ACAT1	0.26203	1.30289e-06	1.30289e-06	0.64549	0.183198	1.30289e-06	0.58603	0.074056	1.30289e-06	0.25108	0.32193	1.30289e-06	0.15342	1.30289e-06	1.30289e-06	0.46732	0.0130738	1.30289e-06
RNU6-607P	0.41416	1.06055	1.30289e-06	0.81369	0.183063	1.30289e-06	0.76683	1.5153	1.30289e-06	0.7569	0.568676	1.30289e-06	0.81631	1.3687	1.30289e-06	0.67864	0.449057	1.30289e-06
RP11-445P17.3	0.69759	0.985723	1.30289e-06	0.73347	0.183063	1.30289e-06	0.74419	0.181484	1.30289e-06	0.65834	0.488424	1.30289e-06	0.43048	0.231353	1.30289e-06	0.40978	0.026505	1.30289e-06
KDM6B	0.40334	0.476633	1.30289e-06	1.0568	0.183063	1.30289e-06	-0.52266	1.30289e-06	1.30289e-06	-0.23922	1.30289e-06	1.30289e-06	0.10106	1.30289e-06	1.30289e-06	0.054708	1.30289e-06	1.30289e-06
AC005162.4	0.68397	0.437398	1.30289e-06	0.41932	0.183063	1.30289e-06	0.73778	0.429623	1.30289e-06	0.67488	0.374675	1.30289e-06	0.45198	0.0194803	1.30289e-06	0.19803	0.026505	1.30289e-06
LAD1	0.43056	0.282661	1.30289e-06	0.59986	0.183063	1.30289e-06	0.46109	0.181484	1.30289e-06	0.36886	0.0873933	1.30289e-06	0.38381	0.373624	1.30289e-06	0.48585	0.0723125	1.30289e-06
MIR31HG	0.41624	0.220867	1.30289e-06	0.32315	0.183063	1.30289e-06	0.48899	0.181484	1.30289e-06	0.48052	0.242706	1.30289e-06	0.41222	0.00705257	1.30289e-06	0.20574	0.026505	1.30289e-06
KCNU1	0.33568	0.220867	1.30289e-06	0.82239	0.183063	1.30289e-06	0.27837	0.027457	1.30289e-06	0.33207	0.0842388	1.30289e-06	0.19577	1.30289e-06	1.30289e-06	0.26436	1.30289e-06	1.30289e-06
C11orf45	0.48791	0.218692	1.30289e-06	0.58518	0.183063	1.30289e-06	0.14103	1.30289e-06	1.30289e-06	0.72717	1.17824	1.30289e-06	0.68653	0.689175	1.30289e-06	0.45258	0.133685	1.30289e-06
RP11-89M20.2	0.7253	0.154891	1.30289e-06	0.44236	0.183063	1.30289e-06	0.78672	0.324742	1.30289e-06	0.41669	0.173956	1.30289e-06	0.5513	0.21602	1.30289e-06	0.20822	0.00777133	1.30289e-06
AC004009.3	0.27711	0.147702	1.30289e-06	0.92782	0.183063	1.30289e-06	0.14799	1.30289e-06	1.30289e-06	0.54277	0.365303	1.30289e-06	0.18333	0.0502802	1.30289e-06	0.060042	1.30289e-06	1.30289e-06
CSRP1	0.56788	0.0963279	1.30289e-06	0.91244	0.183063	1.30289e-06	0.12023	1.30289e-06	1.30289e-06	0.18345	1.30289e-06	1.30289e-06	-0.048288	1.30289e-06	1.30289e-06	0.36321	1.30289e-06	1.30289e-06
RP11-336A10.2	0.37174	0.0653783	1.30289e-06	0.56204	0.183063	1.30289e-06	0.42656	0.0799644	1.30289e-06	0.38709	0.158463	1.30289e-06	0.15543	0.00705257	1.30289e-06	0.46191	0.143507	1.30289e-06
CD274	0.42639	0.0653783	1.30289e-06	0.79929	0.183063	1.30289e-06	0.576	0.0650801	1.30289e-06	0.36756	0.318562	1.30289e-06	0.35336	0.148493	1.30289e-06	-0.024387	1.30289e-06	1.30289e-06
UCN3	0.32599	0.0303656	1.30289e-06	0.65009	0.183063	1.30289e-06	0.083443	0.0301966	1.30289e-06	0.24516	1.30289e-06	1.30289e-06	0.063473	0.00713159	1.30289e-06	0.4129	0.164868	1.30289e-06
SRM	0.33219	0.0303656	1.30289e-06	0.38425	0.183063	1.30289e-06	0.1997	0.00814156	1.30289e-06	-0.10951	1.30289e-06	1.30289e-06	0.43953	0.502252	1.30289e-06	0.55403	0.174085	1.30289e-06
RP11-150O12.2	0.24907	0.0136955	1.30289e-06	0.73891	0.183063	1.30289e-06	0.54469	0.181484	1.30289e-06	0.56261	0.397627	1.30289e-06	0.2541	0.151932	1.30289e-06	0.64532	0.164868	1.30289e-06
RELL1	0.17318	0.0088373	1.30289e-06	0.34867	0.183063	1.30289e-06	0.41966	0.269877	1.30289e-06	0.41082	0.327224	1.30289e-06	0.39589	0.189216	1.30289e-06	0.14727	1.30289e-06	1.30289e-06
C22orf46	0.21075	0.00370684	1.30289e-06	0.63358	0.183063	1.30289e-06	0.44222	0.178009	1.30289e-06	-0.27383	1.30289e-06	0.187474	0.45283	0.106169	1.30289e-06	0.66557	0.126274	1.30289e-06
WNK4	0.25013	1.30289e-06	1.30289e-06	0.49548	0.183063	1.30289e-06	0.41766	0.429623	1.30289e-06	0.3637	0.00882445	1.30289e-06	-0.24262	1.30289e-06	1.30289e-06	0.1731	1.30289e-06	1.30289e-06
VANGL1	-0.46583	1.30289e-06	0.490308	0.62926	0.183063	1.30289e-06	0.35521	0.0726358	1.30289e-06	-0.39332	1.30289e-06	0.0309678	-0.42433	1.30289e-06	0.116513	0.12881	1.30289e-06	1.30289e-06
RP11-324D17.1	0.29517	1.30289e-06	1.30289e-06	0.24747	0.183063	1.30289e-06	0.14309	0.0342552	1.30289e-06	0.49439	0.280495	1.30289e-06	0.074196	1.30289e-06	1.30289e-06	0.24878	0.026505	1.30289e-06
NPTXR	0.08587	1.30289e-06	1.30289e-06	1.0273	0.183063	1.30289e-06	-0.072558	0.00814156	1.30289e-06	-0.53836	1.30289e-06	0.969287	0.21895	0.00831771	1.30289e-06	0.08152	0.026505	1.30289e-06
FMNL1	-0.4365	1.30289e-06	0.100737	-0.15502	0.183063	1.30289e-06	0.41653	0.00207785	1.30289e-06	-0.49904	1.30289e-06	0.0220826	-0.18714	0.0194803	1.30289e-06	-0.072435	1.30289e-06	1.30289e-06
SLC39A9	0.094437	1.30289e-06	1.30289e-06	0.80444	0.183063	1.30289e-06	0.1328	1.30289e-06	1.30289e-06	-0.2758	1.30289e-06	0.229376	0.75644	0.59107	1.30289e-06	0.73367	0.415222	1.30289e-06
RP11-669E14.4	0.0046986	1.30289e-06	1.30289e-06	0.64503	0.183063	1.30289e-06	0.17644	1.30289e-06	1.30289e-06	0.034427	1.30289e-06	1.30289e-06	0.36729	0.239647	1.30289e-06	0.36625	0.0721853	1.30289e-06
EFR3B	0.14874	1.30289e-06	1.30289e-06	0.92254	0.183063	1.30289e-06	0.20249	1.30289e-06	1.30289e-06	0.47899	1.30289e-06	1.30289e-06	-0.14112	1.30289e-06	1.30289e-06	0.17008	0.026505	1.30289e-06
ARRDC3	0.16648	1.30289e-06	1.30289e-06	0.59528	0.183063	1.30289e-06	0.092095	1.30289e-06	1.30289e-06	0.27658	1.30289e-06	1.30289e-06	0.03587	1.30289e-06	1.30289e-06	0.013534	1.30289e-06	1.30289e-06
PPP1R12B	0.27185	1.30289e-06	1.30289e-06	0.13642	0.183063	1.30289e-06	0.10289	1.30289e-06	1.30289e-06	-0.053971	1.30289e-06	1.30289e-06	-0.1435	1.30289e-06	1.30289e-06	0.29945	1.30289e-06	1.30289e-06
RNU1-133P	0.6724	0.602597	1.30289e-06	0.75249	0.178644	1.30289e-06	0.4859	0.181484	1.30289e-06	0.61221	0.474683	1.30289e-06	0.15795	0.0194803	1.30289e-06	0.47662	0.157411	1.30289e-06
AKAP7	0.6133	0.282661	1.30289e-06	0.51031	0.178644	1.30289e-06	0.5555	0.181484	1.30289e-06	0.36087	0.32193	1.30289e-06	0.37146	0.296282	1.30289e-06	0.24378	0.026505	1.30289e-06
KCNJ4	0.77057	0.204324	1.30289e-06	0.56791	0.178644	1.30289e-06	0.28729	0.0829106	1.30289e-06	-0.88515	1.30289e-06	0.718006	0.46334	0.150636	1.30289e-06	0.36101	0.143507	1.30289e-06
RP11-895M11.3	0.75343	0.147702	1.30289e-06	0.82822	0.178644	1.30289e-06	0.078291	0.230677	1.30289e-06	0.43711	1.30289e-06	1.30289e-06	0.53079	0.0918411	1.30289e-06	-0.073947	1.30289e-06	1.30289e-06
C16orf95	0.49125	0.147702	1.30289e-06	0.50023	0.178644	1.30289e-06	0.46898	0.146955	1.30289e-06	0.39737	0.204527	1.30289e-06	0.44307	0.0194803	1.30289e-06	0.28824	0.0897054	1.30289e-06
OXLD1	0.28963	0.147702	1.30289e-06	0.5443	0.178644	1.30289e-06	0.21931	0.0152306	1.30289e-06	0.051774	1.30289e-06	1.30289e-06	0.69117	0.306714	1.30289e-06	0.49726	0.330423	1.30289e-06
RP11-867G23.10	0.46156	0.0746436	1.30289e-06	0.27363	0.178644	1.30289e-06	0.24251	0.462081	1.30289e-06	-0.72725	1.30289e-06	0.895434	0.0048133	1.30289e-06	1.30289e-06	0.34884	0.0890631	1.30289e-06
RP11-554I8.1	0.39803	0.0595911	1.30289e-06	0.44166	0.178644	1.30289e-06	0.35905	0.0696165	1.30289e-06	0.28334	0.272576	1.30289e-06	0.33673	0.203239	1.30289e-06	-0.059868	0.026505	1.30289e-06
ADAM29	0.33652	0.0582442	1.30289e-06	0.47847	0.178644	1.30289e-06	0.079092	0.00897871	1.30289e-06	0.082893	0.32193	1.30289e-06	0.12442	1.30289e-06	1.30289e-06	0.21837	0.0243918	1.30289e-06
TNFSF10	0.44859	0.0424071	1.30289e-06	0.45396	0.178644	1.30289e-06	0.24531	0.0260478	1.30289e-06	0.3921	0.0842388	1.30289e-06	0.23999	1.30289e-06	1.30289e-06	0.31995	0.0852687	1.30289e-06
BBS2	0.3789	0.0419285	1.30289e-06	0.8569	0.178644	1.30289e-06	0.41707	1.30289e-06	1.30289e-06	0.32705	0.405581	1.30289e-06	-0.14164	1.30289e-06	1.30289e-06	0.013292	1.30289e-06	1.30289e-06
CNTD1	0.29972	0.0351146	1.30289e-06	0.88042	0.178644	1.30289e-06	0.46683	0.027457	1.30289e-06	0.56183	0.253213	1.30289e-06	0.23833	0.0194803	1.30289e-06	0.47032	0.0524109	1.30289e-06
TAB2	0.29279	0.0351146	1.30289e-06	0.14548	0.178644	1.30289e-06	-0.082339	1.30289e-06	1.30289e-06	0.27782	1.30289e-06	1.30289e-06	0.065157	0.0918411	1.30289e-06	0.20706	1.30289e-06	1.30289e-06
GSTCD	0.044275	0.0303656	1.30289e-06	0.71666	0.178644	1.30289e-06	0.28667	0.00814156	1.30289e-06	0.58986	0.376045	1.30289e-06	0.076894	1.30289e-06	1.30289e-06	0.22025	0.026505	1.30289e-06
TTC28	0.16008	0.0267534	1.30289e-06	0.86682	0.178644	1.30289e-06	0.4821	0.0726358	1.30289e-06	-0.040865	1.30289e-06	1.30289e-06	0.475	0.171613	1.30289e-06	0.3694	0.026505	1.30289e-06
RASA2	0.15188	0.0208697	1.30289e-06	0.72046	0.178644	1.30289e-06	0.47167	0.0905986	1.30289e-06	0.72328	0.722405	1.30289e-06	0.33751	0.0972201	1.30289e-06	0.37679	0.0852687	1.30289e-06
ATXN1	0.29553	0.0208697	1.30289e-06	0.41582	0.178644	1.30289e-06	0.22846	1.30289e-06	1.30289e-06	0.43918	0.078922	1.30289e-06	0.18615	1.30289e-06	1.30289e-06	0.99182	0.838123	1.30289e-06
RP11-443B20.1	0.33629	0.0208697	1.30289e-06	0.40562	0.178644	1.30289e-06	-0.0041908	1.30289e-06	1.30289e-06	0.080491	1.30289e-06	1.30289e-06	0.15635	0.0502802	1.30289e-06	0.34012	1.30289e-06	1.30289e-06
KB-1562D12.1	0.25182	0.00810129	1.30289e-06	0.74897	0.178644	1.30289e-06	0.37134	0.0187347	1.30289e-06	0.48847	0.189872	1.30289e-06	0.0026318	1.30289e-06	1.30289e-06	0.48398	0.0852687	1.30289e-06
MIEF1	0.32827	0.00370684	0.021909	0.37049	0.178644	1.30289e-06	0.43836	0.0726358	1.30289e-06	-0.39753	1.30289e-06	0.36491	0.45154	0.10467	1.30289e-06	0.64706	0.472512	1.30289e-06
CTA-292E10.8	0.27221	0.00335876	1.30289e-06	0.88306	0.178644	1.30289e-06	0.3427	1.30289e-06	1.30289e-06	0.36061	1.30289e-06	1.30289e-06	0.5415	0.227576	1.30289e-06	0.52177	0.208016	1.30289e-06
KLHL26	-0.046469	0.00224807	1.30289e-06	0.59815	0.178644	1.30289e-06	0.32996	0.0394969	1.30289e-06	-0.018272	1.30289e-06	1.30289e-06	0.26513	1.30289e-06	1.30289e-06	0.2891	1.30289e-06	1.30289e-06
BARX2	0.20157	0.00224807	1.30289e-06	0.55142	0.178644	1.30289e-06	0.35252	1.30289e-06	1.30289e-06	0.28208	1.30289e-06	1.30289e-06	0.29959	0.00713159	1.30289e-06	0.21898	0.026505	1.30289e-06
TMEM80	0.33821	0.00140896	1.30289e-06	0.91051	0.178644	1.30289e-06	-0.10614	1.30289e-06	1.30289e-06	-0.098561	1.30289e-06	1.30289e-06	-0.097173	1.30289e-06	1.30289e-06	-0.17109	1.30289e-06	1.30289e-06
CASC9	0.31472	1.30289e-06	1.30289e-06	0.24605	0.178644	1.30289e-06	0.52257	0.183374	1.30289e-06	0.29199	0.362337	1.30289e-06	0.21061	0.180864	1.30289e-06	0.3341	0.0732631	1.30289e-06
RP11-770G2.2	0.32303	1.30289e-06	1.30289e-06	1.0364	0.178644	1.30289e-06	0.28364	0.181484	1.30289e-06	0.33862	1.30289e-06	1.30289e-06	0.24	1.30289e-06	1.30289e-06	0.017074	1.30289e-06	1.30289e-06
MIR3199-2	0.17075	1.30289e-06	1.30289e-06	0.87057	0.178644	1.30289e-06	0.63866	0.164406	1.30289e-06	0.37156	0.147502	1.30289e-06	0.61925	0.296282	1.30289e-06	0.59609	0.026505	1.30289e-06
ADCY9	0.046172	1.30289e-06	1.30289e-06	0.82918	0.178644	1.30289e-06	-0.0079654	0.164406	1.30289e-06	-0.45312	1.30289e-06	0.135853	0.5639	0.425122	1.30289e-06	0.20686	0.026505	1.30289e-06
CMC2	0.096249	1.30289e-06	1.30289e-06	0.2733	0.178644	1.30289e-06	0.52865	0.15999	1.30289e-06	0.33081	0.318562	1.30289e-06	0.29524	0.05039	1.30289e-06	0.079197	1.30289e-06	1.30289e-06
RP4-625H18.2	0.079186	1.30289e-06	1.30289e-06	0.10972	0.178644	1.30289e-06	0.53568	0.146955	1.30289e-06	0.15973	1.30289e-06	1.30289e-06	0.27607	1.30289e-06	1.30289e-06	0.36162	0.026505	1.30289e-06
CFLAR-AS1	0.19895	1.30289e-06	1.30289e-06	0.64766	0.178644	1.30289e-06	0.33294	0.0812506	1.30289e-06	0.6417	0.584875	1.30289e-06	0.21755	1.30289e-06	1.30289e-06	-0.099577	1.30289e-06	1.30289e-06
IRF8	0.091598	1.30289e-06	1.30289e-06	0.63489	0.178644	1.30289e-06	0.34812	0.0544605	1.30289e-06	0.37423	0.405949	1.30289e-06	0.46282	0.296282	1.30289e-06	0.33297	0.143507	1.30289e-06
CTD-3032H12.1	0.23931	1.30289e-06	1.30289e-06	0.54854	0.178644	1.30289e-06	0.31017	0.0149397	1.30289e-06	0.76452	1.0231	1.30289e-06	0.23264	0.0194803	1.30289e-06	0.1673	1.30289e-06	1.30289e-06
NCAN	-0.28749	1.30289e-06	1.30289e-06	0.63758	0.178644	1.30289e-06	0.2694	0.00954082	1.30289e-06	-0.2521	1.30289e-06	1.30289e-06	0.54848	0.117783	1.30289e-06	0.12048	1.30289e-06	1.30289e-06
PLEKHH3	0.023668	1.30289e-06	1.30289e-06	0.969	0.178644	1.30289e-06	0.027671	1.30289e-06	1.30289e-06	0.78337	0.318562	1.30289e-06	0.50295	0.149805	1.30289e-06	1.0438	0.562219	1.30289e-06
RP11-573G6.6	0.12054	1.30289e-06	1.30289e-06	0.43641	0.178644	1.30289e-06	0.025452	1.30289e-06	1.30289e-06	0.32896	0.270125	1.30289e-06	0.14642	1.30289e-06	1.30289e-06	0.17957	1.30289e-06	1.30289e-06
RN7SKP226	-0.10881	1.30289e-06	1.30289e-06	0.6711	0.178644	1.30289e-06	-0.21955	1.30289e-06	1.30289e-06	0.32088	0.0993352	1.30289e-06	0.065008	1.30289e-06	1.30289e-06	0.021894	1.30289e-06	1.30289e-06
STRADB	0.068163	1.30289e-06	1.30289e-06	0.58315	0.178644	1.30289e-06	0.090605	1.30289e-06	1.30289e-06	0.17578	0.033179	1.30289e-06	0.22665	1.30289e-06	1.30289e-06	0.15567	0.026505	1.30289e-06
ANKRD16	-0.13684	1.30289e-06	1.30289e-06	0.52237	0.178644	1.30289e-06	-0.0081524	1.30289e-06	1.30289e-06	0.19766	0.0298173	1.30289e-06	0.49488	0.0168452	1.30289e-06	0.30473	0.026505	1.30289e-06
AMDHD2	0.054977	1.30289e-06	1.30289e-06	0.63859	0.178644	1.30289e-06	0.073895	1.30289e-06	1.30289e-06	-0.23788	1.30289e-06	1.30289e-06	0.34148	0.00713159	1.30289e-06	0.27043	0.026505	1.30289e-06
MIR3189	0.2309	1.30289e-06	1.30289e-06	0.41335	0.178644	1.30289e-06	0.066668	1.30289e-06	1.30289e-06	-0.1926	1.30289e-06	1.30289e-06	0.17285	1.30289e-06	1.30289e-06	0.53658	0.026505	1.30289e-06
TMPRSS6	0.19222	1.30289e-06	1.30289e-06	0.6545	0.178644	1.30289e-06	0.113	1.30289e-06	1.30289e-06	0.29045	1.30289e-06	1.30289e-06	-0.15409	1.30289e-06	1.30289e-06	0.44703	0.0098277	1.30289e-06
RAB5C	0.16977	1.30289e-06	1.30289e-06	0.16659	0.178644	1.30289e-06	-0.068184	1.30289e-06	1.30289e-06	0.2162	1.30289e-06	1.30289e-06	-0.42747	1.30289e-06	0.060101	-0.26327	1.30289e-06	1.30289e-06
SLC6A18	0.28014	1.30289e-06	1.30289e-06	1.0197	0.178644	1.30289e-06	0.19987	1.30289e-06	1.30289e-06	0.065543	1.30289e-06	1.30289e-06	0.21193	1.30289e-06	1.30289e-06	-0.11188	1.30289e-06	1.30289e-06
TSPAN5	0.041837	1.30289e-06	1.30289e-06	0.51535	0.178644	1.30289e-06	0.010087	1.30289e-06	1.30289e-06	0.10828	1.30289e-06	1.30289e-06	0.10915	1.30289e-06	1.30289e-06	0.167	1.30289e-06	1.30289e-06
RP11-536K7.5	0.28829	0.147702	1.30289e-06	0.50087	0.17552	1.30289e-06	0.20122	0.0313714	1.30289e-06	0.51377	0.482391	1.30289e-06	0.26854	0.00831771	1.30289e-06	0.4406	0.143507	1.30289e-06
GFOD1	0.46458	0.220867	1.30289e-06	0.47038	0.174877	1.30289e-06	0.59642	0.270527	1.30289e-06	0.32726	0.32193	1.30289e-06	0.63519	0.689175	1.30289e-06	0.57947	0.835528	1.30289e-06
MOB2	0.10363	1.30289e-06	1.30289e-06	0.13734	0.168784	1.30289e-06	0.30343	0.00767142	1.30289e-06	-0.079857	0.041097	1.30289e-06	0.069583	0.0800495	1.30289e-06	0.37518	0.0502573	1.30289e-06
CALML3-AS1	0.46635	0.0351146	1.30289e-06	0.76768	0.1629	1.30289e-06	-0.01182	1.30289e-06	1.30289e-06	0.51418	0.32193	1.30289e-06	0.47937	0.0194803	1.30289e-06	0.14437	1.30289e-06	1.30289e-06
KREMEN1	0.17752	1.30289e-06	1.30289e-06	0.81602	0.1629	1.30289e-06	0.25296	0.125031	1.30289e-06	-0.063202	1.30289e-06	1.30289e-06	0.32242	0.306714	1.30289e-06	-0.21537	1.30289e-06	0.920023
FBXO32	0.23719	1.30289e-06	1.30289e-06	0.64482	0.1629	1.30289e-06	0.34461	0.0892225	1.30289e-06	0.52424	0.32193	1.30289e-06	0.62227	0.189216	1.30289e-06	0.86871	0.450498	1.30289e-06
ANXA11	-0.23481	1.30289e-06	1.30289e-06	-0.12297	0.1629	1.30289e-06	-0.06325	1.30289e-06	1.30289e-06	0.51202	0.361173	1.30289e-06	0.36226	0.00705257	1.30289e-06	0.16917	0.026505	1.30289e-06
ANO1	0.49176	0.00855152	1.30289e-06	0.1497	0.161563	1.30289e-06	-0.29811	1.30289e-06	1.30289e-06	-0.012564	1.30289e-06	1.30289e-06	-0.10005	1.30289e-06	1.30289e-06	-0.082576	1.30289e-06	1.30289e-06
TTC7B	0.051172	1.30289e-06	1.30289e-06	0.81457	0.161563	1.30289e-06	0.56372	0.0726358	1.30289e-06	0.17657	1.30289e-06	1.30289e-06	0.1618	1.30289e-06	1.30289e-06	0.18786	0.143507	1.30289e-06
ZFR	0.14843	1.30289e-06	1.30289e-06	0.93888	0.161563	1.30289e-06	-0.34667	1.30289e-06	1.30289e-06	-0.71693	1.30289e-06	1.00516	-0.10519	1.30289e-06	1.30289e-06	-0.92161	1.30289e-06	0.441498
RNU6-762P	0.26977	1.30289e-06	1.30289e-06	0.18477	0.156562	1.30289e-06	-0.053481	1.30289e-06	1.30289e-06	0.7637	0.397627	1.30289e-06	-0.18	1.30289e-06	1.30289e-06	-0.0047328	1.30289e-06	1.30289e-06
RP11-363E6.3	0.30368	1.30289e-06	1.30289e-06	0.5036	0.153302	1.30289e-06	0.66334	0.181484	1.30289e-06	0.54925	0.144483	1.30289e-06	0.14439	1.30289e-06	1.30289e-06	0.18169	1.30289e-06	1.30289e-06
RP11-178L8.7	0.42124	1.30289e-06	1.30289e-06	0.90303	0.153302	1.30289e-06	0.28689	0.027457	1.30289e-06	0.14607	1.30289e-06	1.30289e-06	0.30832	1.30289e-06	1.30289e-06	0.33837	0.143507	1.30289e-06
MAU2	-0.76372	1.30289e-06	0.781903	0.3015	0.153302	1.30289e-06	-1.1079	1.30289e-06	1.21974	-0.52831	1.30289e-06	0.610186	-2.4867	1.30289e-06	2.83209	-2.0429	1.30289e-06	2.78252
SRSF9	-1.0744	1.30289e-06	1.45649	-0.17614	0.149461	1.30289e-06	-0.21725	1.30289e-06	1.30289e-06	0.17351	1.30289e-06	1.30289e-06	0.63577	0.22644	1.30289e-06	0.099582	0.026505	1.30289e-06
WNT7B	0.80602	0.825138	1.30289e-06	0.80949	0.146857	1.30289e-06	0.56735	0.106372	1.30289e-06	-0.52567	1.30289e-06	0.146953	0.75679	0.373624	1.30289e-06	0.39921	0.213551	1.30289e-06
AC068580.5	0.51165	0.304336	1.30289e-06	0.80957	0.146857	1.30289e-06	0.5352	0.249209	1.30289e-06	0.50651	0.284812	1.30289e-06	0.6029	0.272599	1.30289e-06	0.41854	0.213551	1.30289e-06
BTN2A3P	0.35981	0.220867	1.30289e-06	0.32786	0.146857	1.30289e-06	0.45857	0.146955	1.30289e-06	0.46878	0.0842388	1.30289e-06	0.34199	0.115545	1.30289e-06	0.61684	0.246179	1.30289e-06
RETREG1	0.4892	0.218692	1.30289e-06	0.29839	0.146857	1.30289e-06	0.30814	0.0518179	1.30289e-06	0.11493	1.30289e-06	1.30289e-06	0.054525	1.30289e-06	1.30289e-06	0.22933	0.0203997	1.30289e-06
CBX8	0.5309	0.147702	1.30289e-06	0.28252	0.146857	1.30289e-06	0.72386	0.181484	1.30289e-06	0.38928	0.00470623	1.30289e-06	0.3366	0.00133359	1.30289e-06	0.013676	1.30289e-06	1.30289e-06
RNU7-91P	0.19364	0.147702	1.30289e-06	0.34673	0.146857	1.30289e-06	0.24726	0.0652062	1.30289e-06	0.39146	0.193683	1.30289e-06	-0.040824	1.30289e-06	1.30289e-06	0.37593	0.026505	1.30289e-06
RP11-353N14.5	0.37321	0.147702	1.30289e-06	0.66593	0.146857	1.30289e-06	0.17875	0.00814156	1.30289e-06	0.016975	1.30289e-06	1.30289e-06	0.43551	0.146953	1.30289e-06	0.19606	1.30289e-06	1.30289e-06
TLR1	0.56683	0.0746436	1.30289e-06	0.71182	0.146857	1.30289e-06	0.56248	0.164406	1.30289e-06	0.4943	0.114844	1.30289e-06	0.46062	0.145425	1.30289e-06	0.37857	0.0946516	1.30289e-06
RGS17	0.31204	0.0653783	1.30289e-06	0.75381	0.146857	1.30289e-06	0.22507	0.181484	1.30289e-06	0.36899	0.374675	1.30289e-06	0.088275	1.30289e-06	1.30289e-06	-0.19848	1.30289e-06	1.30289e-06
RP11-408H1.3	0.31078	0.0540186	1.30289e-06	0.50597	0.146857	1.30289e-06	0.27568	0.0726358	1.30289e-06	0.44381	0.34379	1.30289e-06	0.26412	1.30289e-06	1.30289e-06	0.28011	0.026505	1.30289e-06
PDZK1	0.40654	0.0419285	1.30289e-06	0.34112	0.146857	1.30289e-06	0.19059	1.30289e-06	1.30289e-06	0.40879	0.112326	1.30289e-06	0.3063	0.294289	1.30289e-06	-0.14166	1.30289e-06	1.30289e-06
OSR1	0.32756	0.0351146	1.30289e-06	0.4594	0.146857	1.30289e-06	0.33949	0.0726358	1.30289e-06	0.87876	0.584875	1.30289e-06	0.063267	1.30289e-06	1.30289e-06	0.35932	0.026505	1.30289e-06
RP11-32D16.1	0.32161	0.0351146	1.30289e-06	0.83791	0.146857	1.30289e-06	0.11591	1.30289e-06	1.30289e-06	0.38182	0.32193	1.30289e-06	0.25478	1.30289e-06	1.30289e-06	0.22026	0.026505	1.30289e-06
HABP2	0.27356	0.0290314	1.30289e-06	0.30032	0.146857	1.30289e-06	-0.12173	1.30289e-06	1.30289e-06	0.17711	0.0352074	1.30289e-06	-0.15458	1.30289e-06	1.30289e-06	0.21914	0.026505	1.30289e-06
CTC-459F4.3	0.20594	0.00855152	1.30289e-06	0.61311	0.146857	1.30289e-06	0.12075	0.181484	1.30289e-06	0.091255	1.30289e-06	1.30289e-06	0.19269	1.30289e-06	1.30289e-06	0.094745	1.30289e-06	1.30289e-06
XXbac-BPG170G13.32	0.40834	0.00855152	1.30289e-06	0.30988	0.146857	1.30289e-06	0.24864	0.0198016	1.30289e-06	0.5604	0.173956	1.30289e-06	0.0606	0.0194803	1.30289e-06	0.36704	0.026505	1.30289e-06
RP11-324O2.3	0.2409	0.00855152	1.30289e-06	0.71247	0.146857	1.30289e-06	0.023442	0.00814156	1.30289e-06	0.090763	1.30289e-06	1.30289e-06	0.15566	1.30289e-06	1.30289e-06	0.27317	0.0732631	1.30289e-06
RP11-964E11.2	0.22322	0.00370684	1.30289e-06	0.44536	0.146857	1.30289e-06	0.68768	0.429623	1.30289e-06	0.82783	0.722405	1.30289e-06	0.54555	0.357918	1.30289e-06	0.33168	0.187994	1.30289e-06
TFAP2A	0.18557	0.00370684	1.30289e-06	-0.090611	0.146857	1.30289e-06	0.20698	1.30289e-06	1.30289e-06	0.001828	1.30289e-06	1.30289e-06	-0.69194	1.30289e-06	0.307257	1.4992	3.34679	1.30289e-06
FOXL1	0.2131	0.00335876	1.30289e-06	0.35316	0.146857	1.30289e-06	-0.25682	1.30289e-06	0.258195	0.48922	0.2342	1.30289e-06	0.35717	0.0194803	1.30289e-06	0.43277	0.026505	1.30289e-06
FBLN1	0.31883	0.00335876	1.30289e-06	0.10515	0.146857	1.30289e-06	-0.32953	1.30289e-06	1.30289e-06	-0.19482	1.30289e-06	1.30289e-06	0.17999	1.30289e-06	1.30289e-06	0.73261	0.0494589	1.30289e-06
SNRNP27	-1.1907	0.00140896	0.309568	-1.577	0.146857	0.484253	-2.0199	1.30289e-06	0.651722	-2.0522	1.30289e-06	0.578255	-2.5449	1.30289e-06	1.02426	-1.1029	1.30289e-06	0.353361
SDC1	0.33963	1.30289e-06	1.30289e-06	0.21131	0.146857	1.30289e-06	0.57108	0.181484	1.30289e-06	0.57151	0.371585	1.30289e-06	0.023705	1.30289e-06	1.30289e-06	0.010751	1.30289e-06	1.30289e-06
RNU7-101P	0.32163	1.30289e-06	1.30289e-06	1.0395	0.146857	1.30289e-06	0.45252	0.056841	1.30289e-06	0.39109	1.30289e-06	1.30289e-06	-0.0821	1.30289e-06	1.30289e-06	0.22213	1.30289e-06	1.30289e-06
TOX3	0.17214	1.30289e-06	1.30289e-06	0.64264	0.146857	1.30289e-06	0.021183	1.30289e-06	1.30289e-06	0.64453	0.315305	1.30289e-06	0.060441	1.30289e-06	1.30289e-06	0.053136	1.30289e-06	1.30289e-06
CYP51A1	-2.2591	1.30289e-06	1.14064	0.56783	0.146857	1.30289e-06	-1.4879	1.30289e-06	0.864451	0.28296	1.30289e-06	1.30289e-06	0.084904	1.30289e-06	1.30289e-06	0.57992	0.449057	1.30289e-06
ZNF823	0.12999	1.30289e-06	1.30289e-06	0.50944	0.146857	1.30289e-06	0.06746	1.30289e-06	1.30289e-06	0.0069044	1.30289e-06	1.30289e-06	0.1698	0.00705257	1.30289e-06	0.32244	0.0377732	1.30289e-06
LINC00671	0.005744	1.30289e-06	1.30289e-06	0.30401	0.146857	1.30289e-06	0.016593	1.30289e-06	1.30289e-06	-0.011788	1.30289e-06	1.30289e-06	-0.16155	1.30289e-06	1.30289e-06	0.37838	0.026505	1.30289e-06
PKD1	0.03364	1.30289e-06	1.30289e-06	0.22594	0.146857	1.30289e-06	0.080207	1.30289e-06	1.30289e-06	-0.3178	1.30289e-06	1.30289e-06	0.30221	1.30289e-06	1.30289e-06	-0.33585	0.0115298	1.30289e-06
LINC00536	0.20491	1.30289e-06	1.30289e-06	1.2532	0.146857	1.30289e-06	-0.12879	1.30289e-06	1.30289e-06	0.12556	1.30289e-06	1.30289e-06	0.37837	0.149805	1.30289e-06	0.33621	0.00548928	1.30289e-06
TALDO1	0.25653	1.30289e-06	1.30289e-06	0.32509	0.146857	1.30289e-06	-0.0055051	1.30289e-06	1.30289e-06	0.037882	1.30289e-06	1.30289e-06	-0.12191	1.30289e-06	1.30289e-06	0.19053	1.30289e-06	1.30289e-06
EDEM2	0.27249	1.30289e-06	1.30289e-06	0.90774	0.146857	1.30289e-06	-0.15719	1.30289e-06	1.30289e-06	-0.92337	1.30289e-06	1.05691	0.19151	1.30289e-06	1.30289e-06	-0.032984	1.30289e-06	1.30289e-06
RP11-863K10.7	0.42273	0.0653783	1.30289e-06	0.50781	0.143639	1.30289e-06	0.28008	1.30289e-06	1.30289e-06	0.089273	1.30289e-06	1.30289e-06	0.12786	1.30289e-06	1.30289e-06	0.27722	0.026505	1.30289e-06
GATA3-AS1	-0.082895	1.30289e-06	1.30289e-06	0.6879	0.142794	1.30289e-06	-0.013003	1.30289e-06	1.30289e-06	0.37534	0.28687	1.30289e-06	0.13524	1.30289e-06	1.30289e-06	0.15688	0.026505	1.30289e-06
PRKCQ-AS1	0.20099	1.30289e-06	1.30289e-06	0.52442	0.142794	1.30289e-06	-0.021805	1.30289e-06	1.30289e-06	0.040475	1.30289e-06	1.30289e-06	0.0029192	0.00705257	1.30289e-06	0.1046	1.30289e-06	1.30289e-06
RP11-353N14.3	0.41465	0.0088373	1.30289e-06	0.78054	0.141676	1.30289e-06	0.51775	0.0544605	1.30289e-06	0.47137	0.405949	1.30289e-06	0.26202	0.0194803	1.30289e-06	0.5136	0.163689	1.30289e-06
CITED4	0.12532	1.30289e-06	1.30289e-06	0.73144	0.141676	1.30289e-06	0.46477	0.146955	1.30289e-06	-0.45055	1.30289e-06	0.133494	0.32391	0.0194803	1.30289e-06	0.10037	1.30289e-06	1.30289e-06
IRX5	-0.075108	1.30289e-06	1.30289e-06	0.26108	0.141676	1.30289e-06	0.61901	0.0905986	1.30289e-06	0.56295	0.32515	1.30289e-06	-0.23721	1.30289e-06	1.30289e-06	-0.20001	1.30289e-06	1.30289e-06
MPP4	0.19926	1.30289e-06	1.30289e-06	0.27687	0.141676	1.30289e-06	0.33832	1.30289e-06	1.30289e-06	1.1127	0.584875	1.30289e-06	0.32411	1.30289e-06	1.30289e-06	0.36936	0.026505	1.30289e-06
TFAP2C	-0.24691	1.30289e-06	1.30289e-06	1.0205	0.141676	1.30289e-06	-0.39455	1.30289e-06	0.84766	-0.045758	1.30289e-06	1.30289e-06	0.09247	1.30289e-06	1.30289e-06	0.092815	1.30289e-06	1.30289e-06
TRAP1	0.13622	1.30289e-06	1.30289e-06	0.84289	0.139366	1.30289e-06	0.30026	0.153544	1.30289e-06	-0.86455	1.30289e-06	1.54789	0.018938	1.30289e-06	1.30289e-06	0.09328	1.30289e-06	1.30289e-06
CCDC88C	0.66297	0.220867	1.30289e-06	0.40169	0.138804	1.30289e-06	0.07637	1.30289e-06	1.30289e-06	0.38684	1.30289e-06	1.30289e-06	0.25483	0.189216	1.30289e-06	0.50463	0.0904236	1.30289e-06
ASB4	0.4923	0.147702	1.30289e-06	0.56918	0.137032	1.30289e-06	0.26827	0.146955	1.30289e-06	0.6094	0.428602	1.30289e-06	0.44417	0.0194803	1.30289e-06	0.58512	0.393463	1.30289e-06
MIR3188	-0.045854	1.30289e-06	1.30289e-06	0.16623	0.136061	1.30289e-06	0.25064	1.30289e-06	1.30289e-06	-0.16535	1.30289e-06	1.30289e-06	0.013532	1.30289e-06	1.30289e-06	0.24693	0.0630512	1.30289e-06
TBC1D3P1-DHX40P1	-0.022906	1.30289e-06	1.30289e-06	0.58867	0.133902	1.30289e-06	0.014293	1.30289e-06	1.30289e-06	-0.26025	1.30289e-06	0.135382	0.38098	0.0682168	1.30289e-06	-0.21942	1.30289e-06	1.30289e-06
SKIDA1	0.053258	1.30289e-06	1.30289e-06	0.74161	0.132549	1.30289e-06	0.25658	0.0198284	1.30289e-06	0.27859	0.0570212	1.30289e-06	0.55973	0.206523	1.30289e-06	0.30815	0.026505	1.30289e-06
RARA	-0.1517	1.30289e-06	1.30289e-06	0.73975	0.132549	1.30289e-06	0.1539	1.30289e-06	1.30289e-06	-0.067023	1.30289e-06	1.30289e-06	-0.63991	1.30289e-06	0.133817	-0.2329	1.30289e-06	1.30289e-06
RN7SKP257	0.25099	0.282661	1.30289e-06	0.33464	0.131903	1.30289e-06	0.30858	0.147048	1.30289e-06	0.61117	0.403086	1.30289e-06	0.33611	0.212721	1.30289e-06	1.0987	0.835528	1.30289e-06
RNA5SP158	0.24305	0.0303656	1.30289e-06	0.80967	0.127159	1.30289e-06	0.53263	0.183374	1.30289e-06	0.417	0.144646	1.30289e-06	0.44583	0.54327	1.30289e-06	0.31972	0.15582	1.30289e-06
SFTA3	0.24817	0.0208697	1.30289e-06	0.5478	0.12679	1.30289e-06	0.84684	1.46026	1.30289e-06	0.55334	0.318562	1.30289e-06	0.37721	0.171613	1.30289e-06	0.068844	1.30289e-06	1.30289e-06
PTPRK	0.024047	1.30289e-06	1.30289e-06	0.88411	0.12679	1.30289e-06	0.38127	0.0812506	1.30289e-06	0.37074	0.318562	1.30289e-06	0.57327	0.425122	1.30289e-06	0.32834	0.0441218	1.30289e-06
AC008397.1	0.56438	0.220867	0.146442	0.36161	0.126757	0.133937	0.26318	0.12053	0.512904	0.62274	0.584875	0.545559	0.4606	0.246656	0.636828	0.38413	0.185662	0.592081
RNU6-930P	0.50876	0.218692	1.30289e-06	0.86869	0.126757	1.30289e-06	0.66769	0.0726358	1.30289e-06	0.61455	0.361173	1.30289e-06	0.68237	0.358374	1.30289e-06	0.64221	0.334813	1.30289e-06
SMARCAL1	0.31312	0.0351146	1.30289e-06	0.74738	0.126757	1.30289e-06	0.94557	0.249209	1.30289e-06	0.5698	0.482391	1.30289e-06	0.49708	0.319756	1.30289e-06	0.33775	0.026505	1.30289e-06
OCEL1	-0.019583	0.0088373	1.30289e-06	0.17119	0.126757	1.30289e-06	0.4383	0.0332666	1.30289e-06	0.35023	1.30289e-06	1.30289e-06	0.38884	0.0194803	1.30289e-06	0.30811	0.026505	1.30289e-06
CDKAL1	0.13642	0.00370684	1.30289e-06	0.69998	0.126757	1.30289e-06	-0.1905	0.0516379	1.30289e-06	0.17147	1.30289e-06	1.30289e-06	0.19645	1.30289e-06	1.30289e-06	0.065108	0.0115298	1.30289e-06
TRPS1	0.023113	1.30289e-06	1.30289e-06	0.10493	0.126757	1.30289e-06	-1.3235	1.30289e-06	1.63886	0.52188	0.42798	1.30289e-06	-0.45991	1.30289e-06	0.411382	0.054308	1.30289e-06	1.30289e-06
RP11-384P14.1	0.20466	1.30289e-06	1.30289e-06	0.57626	0.126757	1.30289e-06	0.12466	1.30289e-06	1.30289e-06	0.3642	0.318562	1.30289e-06	0.13849	0.00293924	1.30289e-06	0.31266	1.30289e-06	1.30289e-06
GPR156	0.3671	1.30289e-06	1.30289e-06	0.90343	0.126757	1.30289e-06	0.12288	1.30289e-06	1.30289e-06	0.13281	1.30289e-06	1.30289e-06	0.021992	1.30289e-06	1.30289e-06	0.14898	1.30289e-06	1.30289e-06
PEX14	0.17438	1.30289e-06	1.30289e-06	0.21387	0.123702	1.30289e-06	0.37621	1.30289e-06	1.30289e-06	0.13518	1.30289e-06	1.30289e-06	0.24723	1.30289e-06	1.30289e-06	0.62141	0.429147	1.30289e-06
RAD23A	0.18387	1.30289e-06	1.30289e-06	0.58935	0.123702	1.30289e-06	0.082894	1.30289e-06	1.30289e-06	-0.47049	1.30289e-06	0.257552	0.041337	1.30289e-06	1.30289e-06	-0.10009	1.30289e-06	1.30289e-06
CHID1	0.80641	0.414289	1.30289e-06	0.67132	0.123087	1.30289e-06	0.58581	0.0313714	1.30289e-06	0.31108	1.30289e-06	1.30289e-06	0.59495	0.0194803	1.30289e-06	0.91309	0.334698	1.30289e-06
FBXO18	-0.0036592	0.220867	1.30289e-06	0.77892	0.123087	1.30289e-06	0.69265	0.156827	1.30289e-06	0.41831	0.364867	1.30289e-06	0.50859	0.141926	1.30289e-06	0.42937	0.145356	1.30289e-06
RP11-346L1.2	0.24695	0.147702	1.30289e-06	0.53633	0.123087	1.30289e-06	0.36152	0.183374	1.30289e-06	0.61272	0.285998	1.30289e-06	0.31797	0.118833	1.30289e-06	0.49358	0.26753	1.30289e-06
CASKIN1	0.54439	0.0653783	1.30289e-06	1.1686	0.123087	1.30289e-06	0.15803	0.0246592	1.30289e-06	0.050252	1.30289e-06	1.30289e-06	0.47776	0.189216	1.30289e-06	0.60341	0.0494589	1.30289e-06
GLIS2	0.027659	0.0351146	1.30289e-06	0.47025	0.123087	1.30289e-06	0.22092	0.170481	1.30289e-06	-0.35374	1.30289e-06	1.30289e-06	0.49163	0.0194803	1.30289e-06	0.11446	0.131097	1.30289e-06
AC007283.5	0.20533	0.00855152	1.30289e-06	0.089258	0.123087	1.30289e-06	0.52409	0.181484	1.30289e-06	0.88668	1.0231	1.30289e-06	0.63019	0.202558	1.30289e-06	0.57986	0.429147	1.30289e-06
CCNF	0.36285	0.00855152	1.30289e-06	0.88452	0.123087	1.30289e-06	0.05509	1.30289e-06	1.30289e-06	0.026964	1.30289e-06	1.30289e-06	0.45644	0.118833	1.30289e-06	0.53157	0.143507	1.30289e-06
C14orf159	-0.11782	1.30289e-06	1.30289e-06	0.62354	0.123087	1.30289e-06	0.52058	0.0332666	1.30289e-06	0.13159	1.30289e-06	1.30289e-06	0.3832	0.0194803	1.30289e-06	0.69083	0.0681589	1.30289e-06
FLOT1	-0.20879	1.30289e-06	0.214418	0.80582	0.123087	1.30289e-06	0.21761	1.30289e-06	1.30289e-06	0.043641	1.30289e-06	1.30289e-06	-0.086671	1.30289e-06	1.30289e-06	0.25403	0.164868	1.30289e-06
IER3	-0.091743	1.30289e-06	1.30289e-06	-0.37132	0.123087	1.30289e-06	0.51329	1.30289e-06	1.30289e-06	0.23595	1.30289e-06	1.30289e-06	0.21538	0.00705257	1.30289e-06	0.48206	0.026505	1.30289e-06
TMEM167A	-0.33138	1.30289e-06	1.30289e-06	-0.052786	0.123087	1.30289e-06	0.0022884	1.30289e-06	1.30289e-06	-0.13874	1.30289e-06	1.30289e-06	-0.44147	1.30289e-06	1.30289e-06	-0.40154	1.30289e-06	1.30289e-06
CCDC117	0.36258	0.0853845	1.30289e-06	0.61341	0.121643	1.30289e-06	0.16581	0.00505101	1.30289e-06	0.18455	1.30289e-06	1.30289e-06	0.3361	0.150636	1.30289e-06	0.044244	1.30289e-06	1.30289e-06
SSBP2	0.51512	0.0351146	1.30289e-06	0.80372	0.121643	1.30289e-06	0.11504	0.00931891	1.30289e-06	0.20538	0.00769175	1.30289e-06	0.12479	1.30289e-06	1.30289e-06	0.20782	0.0212759	1.30289e-06
AZGP1	0.15129	1.30289e-06	1.30289e-06	0.64712	0.121643	1.30289e-06	0.51178	0.146955	1.30289e-06	0.25567	1.30289e-06	1.30289e-06	0.33788	0.180864	1.30289e-06	0.65431	0.213551	1.30289e-06
PDCD1	0.11037	0.147702	1.30289e-06	0.5597	0.118448	1.30289e-06	0.59689	0.15999	1.30289e-06	0.593	0.205905	1.30289e-06	0.37842	0.0194803	1.30289e-06	0.87526	0.90357	1.30289e-06
AC007787.2	-0.1147	1.30289e-06	1.30289e-06	0.26811	0.118448	1.30289e-06	0.0661	1.30289e-06	1.30289e-06	-0.11554	1.30289e-06	1.30289e-06	-0.0466	1.30289e-06	1.30289e-06	-0.35437	1.30289e-06	1.30289e-06
ZBTB7B	0.072101	1.30289e-06	1.30289e-06	0.54241	0.118446	1.30289e-06	-0.052638	1.30289e-06	1.30289e-06	-0.2892	1.30289e-06	1.30289e-06	1.6217	3.15058	1.30289e-06	0.98122	1.1721	1.30289e-06
TNNT3	0.48872	0.220867	1.30289e-06	0.60129	0.113055	1.30289e-06	0.45142	0.181484	1.30289e-06	0.14413	1.30289e-06	1.30289e-06	0.30136	1.30289e-06	1.30289e-06	0.32517	0.026505	1.30289e-06
RP11-97C16.1	0.45948	0.0853845	1.30289e-06	0.57002	0.113055	1.30289e-06	0.58909	0.181484	1.30289e-06	0.4033	0.405581	1.30289e-06	0.64423	0.399652	1.30289e-06	0.58233	0.429147	1.30289e-06
RP5-1022P6.4	0.16748	0.0351146	1.30289e-06	0.42497	0.113055	1.30289e-06	0.12827	1.30289e-06	1.30289e-06	0.48858	0.32193	1.30289e-06	0.4795	0.118833	1.30289e-06	0.079436	0.0115298	1.30289e-06
MIR5010	0.23749	0.0237376	1.30289e-06	0.70326	0.113055	1.30289e-06	0.20341	0.00814156	1.30289e-06	0.059531	1.30289e-06	1.30289e-06	0.52337	0.0852962	1.30289e-06	0.30502	0.0852687	1.30289e-06
AQP4	0.52126	0.0204721	1.30289e-06	0.83654	0.113055	1.30289e-06	0.58786	0.0812506	1.30289e-06	0.34055	1.30289e-06	1.30289e-06	0.24043	1.30289e-06	1.30289e-06	0.10762	1.30289e-06	1.30289e-06
AKAP1	-0.22888	0.0088373	0.14677	0.45114	0.113055	1.30289e-06	0.4838	0.0544605	1.30289e-06	0.41289	0.356397	1.30289e-06	-0.17894	1.30289e-06	1.30289e-06	0.12136	1.30289e-06	1.30289e-06
PLEKHA6	0.048945	1.30289e-06	1.30289e-06	0.52527	0.113055	1.30289e-06	0.35292	0.181484	1.30289e-06	0.17397	0.0399237	1.30289e-06	0.11204	1.30289e-06	1.30289e-06	0.40334	0.429147	1.30289e-06
PCNP	0.0042705	1.30289e-06	1.30289e-06	0.3544	0.113055	1.30289e-06	0.25408	0.0518179	1.30289e-06	0.50312	0.112326	1.30289e-06	0.40295	0.0194803	1.30289e-06	0.64056	0.132153	1.30289e-06
ADGRA2	0.0044101	1.30289e-06	1.30289e-06	0.64183	0.113055	1.30289e-06	-0.16388	0.047883	1.30289e-06	0.078864	0.0592878	1.30289e-06	-0.12564	0.0186685	1.30289e-06	0.3082	0.0494589	1.30289e-06
FBXO31	-0.057473	1.30289e-06	1.30289e-06	0.55089	0.113055	1.30289e-06	0.2735	0.0187347	1.30289e-06	0.36449	0.0298173	1.30289e-06	-0.017144	1.30289e-06	1.30289e-06	0.13428	1.30289e-06	1.30289e-06
GAD1	0.25362	1.30289e-06	1.30289e-06	0.70688	0.113055	1.30289e-06	0.16523	1.30289e-06	1.30289e-06	0.5231	0.318562	1.30289e-06	0.36735	0.0800495	1.30289e-06	0.26696	0.026505	1.30289e-06
SNORA14	-0.13661	1.30289e-06	1.30289e-06	0.031816	0.113055	1.30289e-06	0.096171	1.30289e-06	1.30289e-06	0.43776	0.318562	1.30289e-06	0.11409	1.30289e-06	1.30289e-06	0.33426	0.026505	1.30289e-06
KLF1	0.1567	1.30289e-06	1.30289e-06	0.5483	0.113055	1.30289e-06	0.085264	1.30289e-06	1.30289e-06	-0.58999	1.30289e-06	0.226466	0.68095	0.118833	1.30289e-06	0.46821	0.0852687	1.30289e-06
RP11-580I16.2	0.10202	1.30289e-06	1.30289e-06	0.47064	0.113055	1.30289e-06	-0.66531	1.30289e-06	0.47629	0.19998	1.30289e-06	1.30289e-06	0.10759	1.30289e-06	1.30289e-06	-0.12146	1.30289e-06	1.30289e-06
SEC31A	0.3076	1.30289e-06	1.30289e-06	0.99201	0.113055	1.30289e-06	-0.26729	1.30289e-06	1.30289e-06	-0.45181	1.30289e-06	0.0080274	0.22565	1.30289e-06	1.30289e-06	-0.39252	1.30289e-06	0.382669
OGFOD1	0.16727	1.30289e-06	1.30289e-06	0.12012	0.110908	1.30289e-06	0.020663	1.30289e-06	1.30289e-06	0.075815	1.30289e-06	1.30289e-06	0.038635	1.30289e-06	1.30289e-06	-0.08053	1.30289e-06	1.30289e-06
CTA-984G1.5	-0.075749	1.30289e-06	1.30289e-06	0.71505	0.109083	1.30289e-06	0.62876	0.181484	1.30289e-06	-0.081868	1.30289e-06	1.30289e-06	0.35528	0.0468717	1.30289e-06	0.092549	1.30289e-06	1.30289e-06
HEXIM1	-0.28641	1.30289e-06	1.30289e-06	0.72833	0.106807	1.30289e-06	-0.52798	1.30289e-06	0.0727549	-0.94005	1.30289e-06	1.23611	-0.36526	1.30289e-06	0.00144556	-0.44266	1.30289e-06	0.535472
PDLIM4	0.22891	0.0653783	1.30289e-06	0.83493	0.106289	1.30289e-06	0.60347	0.165145	1.30289e-06	0.18155	0.0144047	1.30289e-06	0.36964	0.0194803	1.30289e-06	0.4854	0.143507	1.30289e-06
GABBR1	-0.0028408	1.30289e-06	1.30289e-06	-0.39071	0.106289	1.30289e-06	0.23772	1.30289e-06	1.30289e-06	0.41169	0.0346012	1.30289e-06	0.15162	1.30289e-06	1.30289e-06	0.21607	0.026505	1.30289e-06
CILP2	-0.21289	1.30289e-06	1.30289e-06	0.71201	0.106289	1.30289e-06	-0.20286	1.30289e-06	1.30289e-06	-0.613	1.30289e-06	0.858939	0.11795	1.30289e-06	1.30289e-06	0.36108	0.026505	1.30289e-06
RP11-293E1.1	0.20261	1.30289e-06	1.30289e-06	0.51583	0.103699	1.30289e-06	0.47577	0.0824777	1.30289e-06	0.24328	0.056326	1.30289e-06	0.26755	1.30289e-06	1.30289e-06	0.22769	1.30289e-06	1.30289e-06
CTD-2547L24.4	0.24867	1.30289e-06	1.30289e-06	0.51905	0.103699	1.30289e-06	0.16025	1.30289e-06	1.30289e-06	0.018397	1.30289e-06	1.30289e-06	0.10764	1.30289e-06	1.30289e-06	0.38374	0.0732631	1.30289e-06
CTSD	0.42182	0.359176	1.30289e-06	0.65963	0.0994898	1.30289e-06	0.44036	0.181484	1.30289e-06	0.29733	1.30289e-06	1.30289e-06	0.097709	0.0343069	1.30289e-06	0.32604	0.026505	1.30289e-06
ITPR1	0.2774	0.0303656	1.30289e-06	0.61374	0.0973483	1.30289e-06	0.41647	0.181484	1.30289e-06	0.10749	1.30289e-06	1.30289e-06	0.27851	0.00705257	1.30289e-06	0.092809	0.026505	1.30289e-06
CTD-2015G9.1	0.38345	0.00855152	1.30289e-06	0.69097	0.0973483	1.30289e-06	0.32702	1.30289e-06	1.30289e-06	0.52502	0.115775	1.30289e-06	0.58845	0.115545	1.30289e-06	0.33902	0.026505	1.30289e-06
DLGAP2	0.097574	1.30289e-06	1.30289e-06	0.68985	0.0973483	1.30289e-06	0.53101	0.147048	1.30289e-06	0.30817	0.361173	1.30289e-06	0.52671	0.178327	1.30289e-06	0.48956	0.050171	1.30289e-06
RP11-150O12.5	0.28581	0.147702	1.30289e-06	0.94088	0.0965459	1.30289e-06	0.53422	0.249209	1.30289e-06	0.69759	0.405581	1.30289e-06	0.34465	0.0194803	1.30289e-06	0.34859	0.026505	1.30289e-06
RP11-335O13.7	-0.096382	1.30289e-06	1.30289e-06	0.73866	0.0965459	1.30289e-06	0.43145	0.153026	1.30289e-06	0.29483	0.0993352	1.30289e-06	0.52016	0.0194803	1.30289e-06	0.60548	0.0927929	1.30289e-06
FOXA1	0.18191	1.30289e-06	1.30289e-06	0.44439	0.0965459	1.30289e-06	0.25038	0.027457	1.30289e-06	0.096277	1.30289e-06	1.30289e-06	-0.33895	1.30289e-06	0.0574647	-0.34938	1.30289e-06	1.30289e-06
SNORD92	-0.079109	1.30289e-06	1.30289e-06	0.6213	0.0965459	1.30289e-06	0.17597	1.30289e-06	1.30289e-06	0.14317	1.30289e-06	1.30289e-06	0.35882	0.00705257	1.30289e-06	-0.17804	1.30289e-06	1.30289e-06
AKR1C1	0.82055	0.532663	1.30289e-06	0.58427	0.0913381	1.30289e-06	0.50249	0.181484	1.30289e-06	0.7322	0.42861	1.30289e-06	0.81417	0.689175	1.30289e-06	0.47289	0.0859876	1.30289e-06
RP1-151F17.1	0.70658	0.220867	1.30289e-06	0.56091	0.0913381	1.30289e-06	0.42186	0.0812506	1.30289e-06	0.4846	0.385959	1.30289e-06	0.89684	0.660944	1.30289e-06	0.79288	0.629498	1.30289e-06
ARHGEF19	0.52989	0.220867	1.30289e-06	0.90039	0.0913381	1.30289e-06	0.51248	0.000335839	1.30289e-06	-0.10153	1.30289e-06	1.30289e-06	0.54286	0.202558	1.30289e-06	0.61844	0.41207	1.30289e-06
MEOX1	0.39242	0.16523	1.30289e-06	0.62692	0.0913381	1.30289e-06	-0.089103	1.30289e-06	1.30289e-06	0.51801	0.112326	1.30289e-06	0.020273	0.0682168	1.30289e-06	0.050986	1.30289e-06	1.30289e-06
UNC45A	0.26925	0.00224807	1.30289e-06	0.20665	0.0913381	1.30289e-06	-0.30925	1.30289e-06	0.137142	-0.85884	1.30289e-06	0.367611	-0.21821	1.30289e-06	1.30289e-06	-0.45607	1.30289e-06	0.0128966
PYY	-0.037539	1.30289e-06	1.30289e-06	0.32114	0.0913381	1.30289e-06	-0.17337	1.30289e-06	1.30289e-06	0.44435	0.256772	1.30289e-06	0.19875	1.30289e-06	1.30289e-06	0.054914	1.30289e-06	1.30289e-06
ENTPD3-AS1	-0.12894	0.147702	1.30289e-06	0.098263	0.0886021	1.30289e-06	0.31552	0.120361	1.30289e-06	0.38604	0.314458	1.30289e-06	0.39401	0.0800495	1.30289e-06	0.25302	0.026505	1.30289e-06
MSI1	-0.29891	1.30289e-06	1.30289e-06	0.70361	0.0886021	1.30289e-06	-0.16762	1.30289e-06	1.30289e-06	-0.24405	1.30289e-06	1.30289e-06	0.23552	1.30289e-06	1.30289e-06	0.35985	0.0494589	1.30289e-06
RBM6	-0.89569	1.30289e-06	1.33351	-0.59559	0.0869728	0.020606	-0.86266	1.30289e-06	0.315568	0.037204	1.30289e-06	1.30289e-06	0.075197	1.30289e-06	1.30289e-06	0.42207	0.0494589	1.30289e-06
TRIM26	0.6977	0.915202	1.30289e-06	0.46737	0.086299	1.30289e-06	0.48302	0.0726358	1.30289e-06	0.47531	0.152398	1.30289e-06	0.79444	0.798267	1.30289e-06	0.75576	0.429147	1.30289e-06
PNPO	-0.31933	0.00224807	1.30289e-06	0.60245	0.086299	1.30289e-06	0.016628	1.30289e-06	1.30289e-06	0.24452	0.0277643	1.30289e-06	0.96843	0.689175	1.30289e-06	0.36411	0.026505	1.30289e-06
ACO2	0.021622	1.30289e-06	1.30289e-06	-0.71294	0.0850209	0.0238207	-2.7882	1.30289e-06	2.18555	-0.68056	1.30289e-06	1.01653	-0.083777	1.30289e-06	1.30289e-06	-0.60499	1.30289e-06	0.603911
GSE1	0.35015	0.147702	1.30289e-06	0.63799	0.0839937	1.30289e-06	0.59393	0.0313714	1.30289e-06	0.4729	0.482391	1.30289e-06	-0.33846	1.30289e-06	1.30289e-06	0.57887	0.280295	1.30289e-06
BCKDHB	-0.10161	1.30289e-06	1.30289e-06	0.53819	0.0839937	1.30289e-06	0.2924	1.30289e-06	1.30289e-06	0.35735	0.0702685	1.30289e-06	0.14422	1.30289e-06	1.30289e-06	-0.19481	0.026505	1.30289e-06
MCM8	-0.1416	1.30289e-06	1.30289e-06	0.58652	0.0839937	1.30289e-06	0.063133	1.30289e-06	1.30289e-06	0.33041	0.0409324	1.30289e-06	0.42832	0.00705257	1.30289e-06	0.77315	0.163689	1.30289e-06
SPPL2C	0.13406	1.30289e-06	1.30289e-06	0.25113	0.0839937	1.30289e-06	0.11277	1.30289e-06	1.30289e-06	0.41639	0.00769175	1.30289e-06	0.20916	1.30289e-06	1.30289e-06	0.1716	0.164868	1.30289e-06
KLHDC4	-0.070791	1.30289e-06	1.30289e-06	0.41016	0.0834003	1.30289e-06	0.0063181	0.0301966	1.30289e-06	0.02984	1.30289e-06	1.30289e-06	0.065541	1.30289e-06	1.30289e-06	0.17499	0.00645444	1.30289e-06
UNC13A	0.21934	1.30289e-06	1.30289e-06	0.79821	0.0834003	1.30289e-06	0.50153	0.00767142	1.30289e-06	-0.19998	1.30289e-06	1.30289e-06	0.78093	0.0442863	1.30289e-06	0.52163	0.0890631	1.30289e-06
ATF4	-0.61826	0.0208697	0.0723812	0.47818	0.0833903	1.30289e-06	-1.3086	1.30289e-06	2.3535	-1.1793	1.30289e-06	1.81132	0.46769	0.108373	1.30289e-06	-0.10437	1.30289e-06	1.30289e-06
SIRT5	0.37486	0.00855152	1.30289e-06	0.51816	0.0811292	1.30289e-06	0.088141	0.00814156	1.30289e-06	0.3564	0.118254	1.30289e-06	0.31803	0.05039	1.30289e-06	0.33102	0.026505	1.30289e-06
CRLF1	-0.2814	1.30289e-06	1.30289e-06	0.31147	0.0811292	1.30289e-06	0.23442	1.30289e-06	1.30289e-06	-0.10021	1.30289e-06	1.30289e-06	-0.55325	1.30289e-06	0.0128407	-0.10441	1.30289e-06	1.30289e-06
CTD-2203A3.1	0.31063	0.218692	1.30289e-06	0.51884	0.0808534	1.30289e-06	0.3135	0.0726358	1.30289e-06	0.56397	0.318562	1.30289e-06	0.21631	0.00705257	1.30289e-06	0.37119	0.026505	1.30289e-06
KLC1	0.48632	0.0853845	1.30289e-06	0.39256	0.0808534	1.30289e-06	0.38228	0.000732403	1.30289e-06	-0.011844	1.30289e-06	1.30289e-06	0.1497	1.30289e-06	1.30289e-06	0.32316	0.026505	1.30289e-06
NKX2-1	-0.0526	1.30289e-06	1.30289e-06	0.562	0.0808534	1.30289e-06	0.47362	0.0102548	1.30289e-06	-0.12486	1.30289e-06	1.30289e-06	0.099597	1.30289e-06	1.30289e-06	-0.31808	0.0203997	1.30289e-06
CHD9	0.29137	1.30289e-06	1.30289e-06	0.86327	0.0808534	1.30289e-06	0.22458	1.30289e-06	1.30289e-06	0.88907	0.365303	1.30289e-06	0.28011	0.0194803	1.30289e-06	0.40656	0.026505	1.30289e-06
CHEK2	0.21809	1.30289e-06	1.30289e-06	0.55318	0.0807493	1.30289e-06	0.30003	0.170481	1.30289e-06	0.089764	1.30289e-06	1.30289e-06	0.41653	0.0776234	1.30289e-06	0.12742	0.0115298	1.30289e-06
SNORA42	0.031937	0.220867	1.30289e-06	0.31744	0.0795297	1.30289e-06	0.28279	0.164406	1.30289e-06	0.12213	0.158578	1.30289e-06	0.19124	0.0682168	1.30289e-06	0.073491	1.30289e-06	1.30289e-06
ZNRF3-AS1	0.30681	0.0351146	1.30289e-06	0.43504	0.0795297	1.30289e-06	0.45426	0.146955	1.30289e-06	-0.15499	1.30289e-06	1.30289e-06	0.6756	0.202558	1.30289e-06	0.20091	1.30289e-06	1.30289e-06
ARMT1	0.12666	1.30289e-06	1.30289e-06	0.37632	0.0795297	1.30289e-06	0.53685	0.0518179	1.30289e-06	0.18579	1.30289e-06	1.30289e-06	0.17765	1.30289e-06	1.30289e-06	0.10935	0.0115298	1.30289e-06
ZNF354A	0.24518	0.00855152	1.30289e-06	0.30162	0.0790449	1.30289e-06	0.10035	0.0301966	1.30289e-06	0.22759	1.30289e-06	1.30289e-06	0.18514	1.30289e-06	1.30289e-06	0.24293	0.026505	1.30289e-06
AP000439.3	0.022835	1.30289e-06	1.30289e-06	0.12083	0.0790449	1.30289e-06	0.12782	1.30289e-06	1.30289e-06	0.12691	1.30289e-06	1.30289e-06	-0.36189	0.0682168	1.30289e-06	0.099419	0.0910997	1.30289e-06
APOBEC3A	0.54941	0.0653783	1.30289e-06	0.69823	0.0777558	1.30289e-06	0.36913	0.125031	1.30289e-06	-0.13518	1.30289e-06	0.417772	0.72488	0.19962	1.30289e-06	0.086023	1.30289e-06	1.30289e-06
FERMT1	0.15164	0.0419285	1.30289e-06	0.85488	0.0777558	1.30289e-06	0.075198	0.0518179	1.30289e-06	0.15477	0.0980423	1.30289e-06	0.071312	1.30289e-06	1.30289e-06	-0.80432	1.30289e-06	1.46948
MKL1	0.45666	0.0267534	1.30289e-06	0.58481	0.0776202	1.30289e-06	-0.25158	1.30289e-06	1.30289e-06	-0.50973	1.30289e-06	0.416534	0.024882	0.0786299	1.30289e-06	-0.20181	1.30289e-06	1.30289e-06
RP11-456K23.1	0.47692	0.00335876	1.30289e-06	0.85847	0.0765549	1.30289e-06	-0.076289	1.30289e-06	1.30289e-06	0.93961	0.536264	1.30289e-06	-0.19184	1.30289e-06	1.30289e-06	0.31579	1.30289e-06	1.30289e-06
MIR1301	0.48688	0.147702	1.30289e-06	0.62441	0.0765254	1.30289e-06	0.64357	0.181484	1.30289e-06	0.54244	0.584875	1.30289e-06	0.43469	0.357918	1.30289e-06	0.28004	0.0732631	1.30289e-06
RP11-18F14.4	0.46875	0.147702	1.30289e-06	0.74361	0.0765254	1.30289e-06	0.18711	1.30289e-06	1.30289e-06	0.56979	0.133292	1.30289e-06	0.32742	0.0194803	1.30289e-06	0.17754	0.0203997	1.30289e-06
AQP4-AS1	0.49017	0.0303656	1.30289e-06	1.1288	0.0765254	1.30289e-06	0.005999	1.30289e-06	1.30289e-06	0.13856	1.30289e-06	1.30289e-06	0.31696	1.30289e-06	1.30289e-06	0.37891	0.00790045	1.30289e-06
FBXW9	0.26175	0.0208697	1.30289e-06	0.62103	0.0765254	1.30289e-06	0.044838	1.30289e-06	1.30289e-06	-0.58126	1.30289e-06	0.24756	0.56384	0.0194803	1.30289e-06	0.45896	0.026505	1.30289e-06
DFFA	0.17535	0.00855152	1.30289e-06	0.38696	0.0765254	1.30289e-06	0.39681	0.249209	1.30289e-06	0.42003	0.00470623	1.30289e-06	0.33601	0.0194803	1.30289e-06	0.46864	0.259778	1.30289e-06
RP11-525K10.3	0.23714	0.00370684	1.30289e-06	0.64619	0.0765254	1.30289e-06	0.23265	0.00795353	1.30289e-06	0.70247	0.318562	1.30289e-06	0.35036	0.326241	1.30289e-06	0.69829	0.334813	1.30289e-06
SDHB	0.15693	0.00370684	1.30289e-06	0.44288	0.0765254	1.30289e-06	-1.6975	1.30289e-06	0.760896	-0.15919	1.30289e-06	1.30289e-06	1.3923	2.30539	1.30289e-06	0.53946	0.0723125	1.30289e-06
LMO4	0.34246	1.30289e-06	1.30289e-06	0.71453	0.0765254	1.30289e-06	0.35749	0.175235	1.30289e-06	0.021308	1.30289e-06	1.30289e-06	0.24754	1.30289e-06	1.30289e-06	-0.0096183	0.026505	1.30289e-06
RP11-358B23.1	0.23851	1.30289e-06	1.30289e-06	0.42873	0.0765254	1.30289e-06	0.36689	0.0985253	1.30289e-06	0.17488	0.0353718	1.30289e-06	0.084758	0.00713159	1.30289e-06	0.26465	0.187994	1.30289e-06
BHLHE40-AS1	0.40146	1.30289e-06	1.30289e-06	0.13284	0.0765254	1.30289e-06	0.21206	0.0795	1.30289e-06	0.76098	0.42798	1.30289e-06	0.30319	1.30289e-06	1.30289e-06	-0.38308	0.0252701	1.30289e-06
HAS2-AS1	-0.029047	1.30289e-06	1.30289e-06	0.04565	0.0765254	1.30289e-06	0.2745	0.0313714	1.30289e-06	0.52587	0.361173	1.30289e-06	0.30892	0.0194803	1.30289e-06	0.16694	0.026505	1.30289e-06
CASC10	0.05601	1.30289e-06	1.30289e-06	0.92568	0.0765254	1.30289e-06	0.24588	0.00814156	1.30289e-06	0.35705	0.0570212	1.30289e-06	0.54847	0.239647	1.30289e-06	0.32156	0.026505	1.30289e-06
B3GNT2	0.080428	1.30289e-06	1.30289e-06	0.27713	0.0765254	1.30289e-06	0.19938	1.30289e-06	1.30289e-06	0.4768	0.0385371	1.30289e-06	-1.7653	1.30289e-06	0.375109	-0.83171	1.30289e-06	0.548786
GOLGA5	0.035588	1.30289e-06	1.30289e-06	0.494	0.0765254	1.30289e-06	0.24546	1.30289e-06	1.30289e-06	-0.01168	1.30289e-06	1.30289e-06	0.66373	0.118833	1.30289e-06	0.70217	0.846389	1.30289e-06
IRX4	0.15342	1.30289e-06	1.30289e-06	0.81149	0.0765254	1.30289e-06	-0.4621	1.30289e-06	1.30289e-06	-0.36259	1.30289e-06	0.347462	0.19057	1.30289e-06	1.30289e-06	-0.0044486	0.0630512	1.30289e-06
AL157902.3	-0.0011041	1.30289e-06	1.30289e-06	0.48878	0.0765254	1.30289e-06	0.29585	1.30289e-06	1.30289e-06	0.052762	1.30289e-06	1.30289e-06	-0.18408	1.30289e-06	1.30289e-06	0.0092294	0.026505	1.30289e-06
OR14J1	0.28817	0.0351146	1.30289e-06	0.48995	0.0728674	1.30289e-06	0.23858	0.164406	1.30289e-06	0.50269	0.0873933	1.30289e-06	0.20879	0.0194803	1.30289e-06	0.54021	0.322458	1.30289e-06
RP11-114I8.4	0.19797	1.30289e-06	1.30289e-06	0.41936	0.0728674	1.30289e-06	0.59831	0.183374	1.30289e-06	0.33763	0.102358	1.30289e-06	0.12776	1.30289e-06	1.30289e-06	0.35329	0.0732631	1.30289e-06
TRIL	0.48898	0.0232764	1.30289e-06	0.59241	0.0710708	1.30289e-06	0.60058	0.027457	1.30289e-06	0.56953	0.494083	1.30289e-06	-0.090058	1.30289e-06	1.30289e-06	0.24426	1.30289e-06	1.30289e-06
SCARA5	0.38583	0.0267534	1.30289e-06	0.47358	0.0699985	1.30289e-06	0.71396	0.181484	1.30289e-06	0.27788	0.32515	1.30289e-06	0.69908	0.272599	1.30289e-06	0.70115	0.241383	1.30289e-06
CADPS	0.18076	0.00855152	1.30289e-06	0.28027	0.0699985	1.30289e-06	0.53203	0.249209	1.30289e-06	0.47346	0.584875	1.30289e-06	0.31138	0.227576	1.30289e-06	0.6601	1.5153	1.30289e-06
BRD9	-0.67654	1.30289e-06	1.15654	0.79373	0.0699985	1.30289e-06	0.35834	0.0726358	1.30289e-06	0.48974	0.417453	1.30289e-06	0.22979	1.30289e-06	1.30289e-06	1.6963	3.34679	1.30289e-06
GPR68	0.19625	1.30289e-06	1.30289e-06	0.50657	0.0699985	1.30289e-06	-0.0024853	1.30289e-06	1.30289e-06	-0.041135	1.30289e-06	1.30289e-06	-0.2015	1.30289e-06	1.30289e-06	0.29463	0.00645444	1.30289e-06
ADGRG7	-0.085909	1.30289e-06	1.30289e-06	0.45134	0.0699985	1.30289e-06	0.39495	1.30289e-06	1.30289e-06	0.28372	1.30289e-06	1.30289e-06	-0.041622	1.30289e-06	1.30289e-06	0.1134	1.30289e-06	1.30289e-06
PLA2G1B	-0.072276	1.30289e-06	1.30289e-06	0.55068	0.0687558	1.30289e-06	0.40444	0.181484	1.30289e-06	-0.12929	1.30289e-06	1.30289e-06	0.15011	1.30289e-06	1.30289e-06	0.010824	1.30289e-06	1.30289e-06
RBL2	0.32284	1.30289e-06	1.30289e-06	0.62866	0.0687558	1.30289e-06	-0.35876	1.30289e-06	0.197918	0.34092	0.0980423	1.30289e-06	-0.27504	1.30289e-06	1.30289e-06	-0.040297	1.30289e-06	1.30289e-06
OR2A1-AS1	-0.11302	1.30289e-06	1.30289e-06	0.59337	0.0666383	1.30289e-06	0.61365	0.181484	1.30289e-06	0.22607	1.30289e-06	1.30289e-06	0.35653	0.0735217	1.30289e-06	0.21586	1.30289e-06	1.30289e-06
HAT1	0.22736	0.122168	1.30289e-06	0.44381	0.0663786	1.30289e-06	0.065024	1.30289e-06	1.30289e-06	0.5946	0.671883	1.30289e-06	0.25355	0.0137372	1.30289e-06	-0.072734	1.30289e-06	1.30289e-06
RBP7	0.30215	0.00224807	1.30289e-06	0.59986	0.0663786	1.30289e-06	0.40106	0.0388624	1.30289e-06	0.061473	0.0454893	1.30289e-06	0.042573	1.30289e-06	1.30289e-06	0.71048	0.775863	1.30289e-06
STH	-0.176	1.30289e-06	1.30289e-06	0.36391	0.0663786	1.30289e-06	-0.40043	1.30289e-06	0.106688	-0.29008	1.30289e-06	0.0368769	0.21204	1.30289e-06	1.30289e-06	0.5708	0.0732631	1.30289e-06
DCST2	-0.2333	1.30289e-06	1.30289e-06	-0.65405	0.0663786	0.458814	-0.18148	1.30289e-06	1.30289e-06	-0.32702	1.30289e-06	1.30289e-06	0.010599	1.30289e-06	1.30289e-06	0.48302	1.30289e-06	1.30289e-06
ZNF500	0.085146	1.30289e-06	1.30289e-06	0.47896	0.0663366	1.30289e-06	0.20569	0.00322617	1.30289e-06	-0.47108	1.30289e-06	0.180762	0.3281	0.0194803	1.30289e-06	0.18171	1.30289e-06	1.30289e-06
AP2A2	0.71584	0.304336	1.30289e-06	0.073444	0.0660549	1.30289e-06	0.40629	0.183374	1.30289e-06	-0.27361	1.30289e-06	1.30289e-06	0.010311	1.30289e-06	1.30289e-06	-0.069497	1.30289e-06	1.30289e-06
BTN3A1	0.73943	0.220867	1.30289e-06	0.49356	0.0660549	1.30289e-06	0.31977	0.181484	1.30289e-06	0.28729	0.041097	1.30289e-06	0.32951	0.201791	1.30289e-06	0.60814	0.143507	1.30289e-06
SGSM3	0.37712	0.0351146	1.30289e-06	0.26484	0.0660549	1.30289e-06	0.35871	0.164406	1.30289e-06	-0.73567	1.30289e-06	0.153598	0.58413	0.167561	1.30289e-06	0.83177	0.835528	1.30289e-06
PGPEP1	0.55828	0.0208697	1.30289e-06	0.58096	0.0660549	1.30289e-06	0.021521	1.30289e-06	1.30289e-06	0.059386	1.30289e-06	1.30289e-06	0.11638	1.30289e-06	1.30289e-06	-0.066794	1.30289e-06	1.30289e-06
CPVL	-0.017985	1.30289e-06	1.30289e-06	0.46893	0.0660549	1.30289e-06	0.11552	1.30289e-06	1.30289e-06	0.91341	1.17824	1.30289e-06	0.45828	0.145425	1.30289e-06	0.56654	0.026505	1.30289e-06
TNFRSF13C	0.55722	0.304336	1.30289e-06	0.23971	0.0658971	1.30289e-06	0.5249	1.30289e-06	1.30289e-06	-0.27913	1.30289e-06	1.30289e-06	0.70296	0.117783	1.30289e-06	0.6183	0.026505	1.30289e-06
LINC00707	0.48202	0.0853845	1.30289e-06	0.10745	0.0658971	1.30289e-06	0.65871	0.183374	1.30289e-06	0.75549	0.318562	1.30289e-06	0.68376	0.115545	1.30289e-06	0.46172	0.164868	1.30289e-06
DCBLD2	0.34381	0.0088373	1.30289e-06	0.48436	0.0658971	1.30289e-06	0.034808	1.30289e-06	1.30289e-06	0.34935	0.0277643	1.30289e-06	-0.20002	1.30289e-06	1.30289e-06	-0.044322	0.026505	1.30289e-06
NRIP1	0.4816	0.825138	1.30289e-06	0.38095	0.0656697	1.30289e-06	0.42465	0.181484	1.30289e-06	0.6382	1.0231	1.30289e-06	0.36575	0.239091	1.30289e-06	1.3429	2.75252	1.30289e-06
PLEKHM1	-0.32764	1.30289e-06	0.248851	1.0839	0.0656697	1.30289e-06	-0.035148	1.30289e-06	1.30289e-06	0.026589	1.30289e-06	1.30289e-06	-0.3745	1.30289e-06	0.918663	0.30471	1.30289e-06	1.30289e-06
RP11-213H15.4	0.3507	0.147702	1.30289e-06	0.43482	0.0650019	1.30289e-06	0.56212	0.183374	1.30289e-06	0.5409	0.158862	1.30289e-06	0.46914	0.0967228	1.30289e-06	0.36847	0.143507	1.30289e-06
FAM174B	0.39409	0.00417314	1.30289e-06	0.39487	0.0650019	1.30289e-06	0.19773	0.027457	1.30289e-06	0.58148	0.286648	1.30289e-06	0.58751	0.189216	1.30289e-06	0.2846	0.026505	1.30289e-06
AKR1C2	0.20542	1.30289e-06	1.30289e-06	0.41386	0.0650019	1.30289e-06	0.48929	0.15367	1.30289e-06	0.45567	0.245584	1.30289e-06	0.57893	0.423603	1.30289e-06	0.51433	0.120972	1.30289e-06
PRKCQ	-0.10793	1.30289e-06	1.30289e-06	0.65813	0.0650019	1.30289e-06	0.43352	0.0301966	1.30289e-06	0.36006	1.30289e-06	1.30289e-06	0.90209	0.59107	1.30289e-06	0.97562	0.846389	1.30289e-06
CPNE1	0.26556	1.30289e-06	1.30289e-06	0.46956	0.0650019	1.30289e-06	0.14924	0.0115057	1.30289e-06	-0.87565	1.30289e-06	0.734018	0.084314	1.30289e-06	1.30289e-06	0.26725	0.0115298	1.30289e-06
TM6SF2	-0.049873	1.30289e-06	1.30289e-06	0.5043	0.0650019	1.30289e-06	0.097494	1.30289e-06	1.30289e-06	-0.325	1.30289e-06	0.782624	0.044221	1.30289e-06	1.30289e-06	-0.053491	1.30289e-06	1.30289e-06
AL512791.1	0.42022	0.137615	1.30289e-06	0.068468	0.0648082	1.30289e-06	0.27096	0.0273145	1.30289e-06	-0.17396	1.30289e-06	1.30289e-06	0.37456	0.227576	1.30289e-06	0.24311	0.026505	1.30289e-06
MAPT-AS1	-0.082584	1.30289e-06	1.30289e-06	0.69028	0.0648082	1.30289e-06	0.044144	1.30289e-06	1.30289e-06	0.7794	0.397627	1.30289e-06	0.21067	1.30289e-06	1.30289e-06	0.52667	0.026505	1.30289e-06
RP11-510D21.1	0.38614	0.220867	1.30289e-06	0.50279	0.0643341	1.30289e-06	0.55733	0.249209	1.30289e-06	0.69941	0.393293	1.30289e-06	0.72221	0.296282	1.30289e-06	0.81013	0.844203	1.30289e-06
JAK2	0.40618	0.220867	1.30289e-06	0.48829	0.0643341	1.30289e-06	0.16009	0.00767142	1.30289e-06	0.50717	0.32515	1.30289e-06	0.030225	1.30289e-06	1.30289e-06	0.21421	0.026505	1.30289e-06
IL2RA	0.4109	0.139997	1.30289e-06	0.76765	0.0643341	1.30289e-06	0.14435	0.00897871	1.30289e-06	0.38854	0.242706	1.30289e-06	0.20587	0.141281	1.30289e-06	0.055922	1.30289e-06	1.30289e-06
RECQL	0.4997	0.121487	1.30289e-06	0.48042	0.0643341	1.30289e-06	0.3018	1.30289e-06	1.30289e-06	0.48997	0.0873933	1.30289e-06	0.017237	1.30289e-06	1.30289e-06	0.47534	0.0389754	1.30289e-06
CRTC1	0.28304	0.0088373	1.30289e-06	0.34508	0.0643341	1.30289e-06	0.3959	0.153198	1.30289e-06	-0.24551	1.30289e-06	0.340618	0.49767	0.115545	1.30289e-06	0.61756	0.0965654	1.30289e-06
ECT2L	0.016891	1.30289e-06	1.30289e-06	0.56792	0.0643341	1.30289e-06	0.6387	0.0829106	1.30289e-06	0.43075	0.294556	1.30289e-06	0.56407	0.343368	1.30289e-06	0.12512	0.0389754	1.30289e-06
BABAM1	-0.49535	1.30289e-06	0.00939035	0.37728	0.0643341	1.30289e-06	-0.13665	1.30289e-06	1.30289e-06	-0.31502	1.30289e-06	1.30289e-06	0.27736	1.30289e-06	1.30289e-06	-0.27584	1.30289e-06	1.30289e-06
WDR83OS	-0.058144	1.30289e-06	1.30289e-06	0.45598	0.0639399	1.30289e-06	0.48813	0.136145	1.30289e-06	-0.25731	1.30289e-06	1.30289e-06	0.45736	0.0782532	1.30289e-06	0.37039	0.0852687	1.30289e-06
RP11-1060J15.4	0.12644	1.30289e-06	1.30289e-06	0.42169	0.0639399	1.30289e-06	-0.064803	0.0313714	1.30289e-06	0.062364	1.30289e-06	1.30289e-06	0.36155	0.0194803	1.30289e-06	0.16762	1.30289e-06	1.30289e-06
TMEM254	-0.032206	1.30289e-06	1.30289e-06	-0.19499	0.0639399	1.30289e-06	0.26607	0.000335839	1.30289e-06	0.52088	0.318562	1.30289e-06	0.16302	1.30289e-06	1.30289e-06	-6.7837e-05	1.30289e-06	1.30289e-06
AOX1	0.068432	1.30289e-06	1.30289e-06	0.50913	0.0639399	1.30289e-06	-0.14665	1.30289e-06	1.30289e-06	0.40671	0.261415	1.30289e-06	-0.1199	1.30289e-06	1.30289e-06	0.057822	1.30289e-06	1.30289e-06
AC004593.3	0.34608	0.304336	1.30289e-06	0.4755	0.063628	1.30289e-06	0.52411	0.181484	1.30289e-06	0.44208	0.0399237	1.30289e-06	0.54109	0.296282	1.30289e-06	0.26563	1.30289e-06	1.30289e-06
PALM3	0.11561	1.30289e-06	1.30289e-06	0.34888	0.063628	1.30289e-06	0.39832	0.112368	1.30289e-06	-0.19009	1.30289e-06	1.30289e-06	0.45154	1.30289e-06	1.30289e-06	0.16199	1.30289e-06	1.30289e-06
SPATA18	0.19673	1.30289e-06	1.30289e-06	0.45105	0.063628	1.30289e-06	0.49364	0.0985253	1.30289e-06	0.090483	1.30289e-06	1.30289e-06	0.20673	1.30289e-06	1.30289e-06	0.20598	0.026505	1.30289e-06
RN7SKP78	0.20964	1.30289e-06	1.30289e-06	0.52319	0.063628	1.30289e-06	0.49542	0.0983499	1.30289e-06	-0.010861	1.30289e-06	1.30289e-06	0.11944	1.30289e-06	1.30289e-06	-0.083024	1.30289e-06	1.30289e-06
NR1H3	0.18701	1.30289e-06	1.30289e-06	0.4892	0.063628	1.30289e-06	0.24893	0.00814156	1.30289e-06	0.024195	1.30289e-06	1.30289e-06	-0.072747	0.0194803	1.30289e-06	0.39787	0.026505	1.30289e-06
CCDC43	-0.37496	1.30289e-06	0.278134	0.6794	0.063628	1.30289e-06	-0.408	1.30289e-06	1.30289e-06	0.43266	0.0274399	1.30289e-06	-0.38882	1.30289e-06	1.30289e-06	-0.045482	1.30289e-06	1.30289e-06
RP11-126L15.4	0.58192	0.147702	1.30289e-06	0.55822	0.0634757	1.30289e-06	0.10356	1.30289e-06	1.30289e-06	-0.12108	1.30289e-06	1.30289e-06	0.21686	1.30289e-06	1.30289e-06	0.60274	0.330423	1.30289e-06
GHDC	0.17924	1.30289e-06	1.30289e-06	0.60675	0.0634757	1.30289e-06	-0.023823	0.0835213	1.30289e-06	0.019372	1.30289e-06	1.30289e-06	-0.0078767	1.30289e-06	1.30289e-06	0.06569	1.30289e-06	1.30289e-06
LRRC37A	-0.02794	1.30289e-06	1.30289e-06	0.34975	0.0634757	1.30289e-06	0.45556	0.0692995	1.30289e-06	0.5305	0.315305	1.30289e-06	0.48108	0.0776234	1.30289e-06	0.56561	0.102551	1.30289e-06
NAGLU	0.315	1.30289e-06	1.30289e-06	0.58934	0.0623477	1.30289e-06	-0.19095	1.30289e-06	1.30289e-06	-0.16613	1.30289e-06	1.30289e-06	0.023535	1.30289e-06	1.30289e-06	0.33442	0.026505	1.30289e-06
RP11-12J10.3	0.33005	0.0875351	1.30289e-06	0.36587	0.0615038	1.30289e-06	0.46951	0.429623	1.30289e-06	0.4237	0.482391	1.30289e-06	0.20311	0.0168452	1.30289e-06	0.072652	1.30289e-06	1.30289e-06
RP11-318E3.9	0.3379	0.0351146	1.30289e-06	0.14523	0.0615038	1.30289e-06	0.47048	0.181484	1.30289e-06	0.58998	0.397627	1.30289e-06	0.15886	1.30289e-06	1.30289e-06	0.16185	0.0203997	1.30289e-06
JADE2	-0.43391	1.30289e-06	1.30289e-06	-0.36676	0.0615038	1.30289e-06	0.45835	1.30289e-06	1.30289e-06	-0.66082	1.30289e-06	0.0337043	-0.19846	1.30289e-06	1.30289e-06	-0.40078	1.30289e-06	1.30289e-06
RP11-457M11.2	0.35631	0.532663	1.30289e-06	0.10019	0.0607968	1.30289e-06	0.49913	0.181484	1.30289e-06	0.14675	0.474683	1.30289e-06	0.79647	0.246656	1.30289e-06	0.11046	0.163689	1.30289e-06
RAB11FIP1	0.57706	0.0653783	1.30289e-06	0.55875	0.0607968	1.30289e-06	0.21637	1.30289e-06	1.30289e-06	0.30869	1.30289e-06	1.30289e-06	0.29265	0.151932	1.30289e-06	0.95516	0.518214	1.30289e-06
PPP2R1B	0.36197	0.0458255	1.30289e-06	0.24537	0.0607968	1.30289e-06	0.22451	1.30289e-06	1.30289e-06	0.33782	0.0842388	1.30289e-06	0.11964	1.30289e-06	1.30289e-06	0.22324	0.026505	1.30289e-06
GLI2	0.22252	0.00855152	1.30289e-06	0.68987	0.0607968	1.30289e-06	0.14881	1.30289e-06	1.30289e-06	0.64081	0.397627	1.30289e-06	0.3802	0.0194803	1.30289e-06	0.61239	0.155848	1.30289e-06
DNAJC27	0.28145	1.30289e-06	1.30289e-06	0.46545	0.0607968	1.30289e-06	0.62419	0.181484	1.30289e-06	0.53733	0.286648	1.30289e-06	0.40095	1.30289e-06	1.30289e-06	0.32765	0.0494589	1.30289e-06
RALB	-0.04665	1.30289e-06	1.30289e-06	0.033898	0.0607968	1.30289e-06	0.32452	1.30289e-06	1.30289e-06	0.68002	0.318562	1.30289e-06	-0.25308	1.30289e-06	1.30289e-06	-0.12338	1.30289e-06	1.30289e-06
NFIX	-0.093541	1.30289e-06	1.30289e-06	0.38747	0.0607968	1.30289e-06	-0.15031	1.30289e-06	1.30289e-06	-0.36753	1.30289e-06	0.795481	-0.51424	1.30289e-06	0.31715	-0.60113	1.30289e-06	1.05264
NTN4	-0.033528	1.30289e-06	1.30289e-06	0.30188	0.0607968	1.30289e-06	-0.0093606	1.30289e-06	1.30289e-06	0.074127	1.30289e-06	1.30289e-06	0.020153	1.30289e-06	1.30289e-06	0.046332	1.30289e-06	1.30289e-06
YWHAZ	-0.10393	1.30289e-06	1.30289e-06	0.72797	0.0607949	1.30289e-06	0.082155	0.100537	1.30289e-06	0.012379	1.30289e-06	1.30289e-06	-0.14201	1.30289e-06	1.30289e-06	-0.34779	1.30289e-06	0.352257
RP11-1136G4.1	0.45187	0.147702	1.30289e-06	0.47794	0.0583912	1.30289e-06	0.40343	0.0726358	1.30289e-06	0.83593	1.0231	1.30289e-06	0.20241	1.30289e-06	1.30289e-06	0.31136	0.026505	1.30289e-06
B3GNT4	0.29365	0.0303656	1.30289e-06	0.486	0.0583912	1.30289e-06	0.37019	0.0871554	1.30289e-06	-0.32255	0.0256435	1.30289e-06	0.34722	0.00293924	1.30289e-06	-0.19904	1.30289e-06	1.30289e-06
RP11-1167A19.2	-0.28408	1.30289e-06	1.30289e-06	0.030886	0.0583912	1.30289e-06	-0.21023	1.30289e-06	0.171265	-0.51616	1.30289e-06	0.216703	-0.25039	1.30289e-06	1.30289e-06	-0.43013	1.30289e-06	0.026807
RP11-379F12.4	0.19279	1.30289e-06	1.30289e-06	0.37684	0.0583912	1.30289e-06	-0.13252	1.30289e-06	1.30289e-06	-0.14239	1.30289e-06	1.30289e-06	0.047876	1.30289e-06	1.30289e-06	0.20385	1.30289e-06	1.30289e-06
SLC25A21	0.30525	0.304336	1.30289e-06	0.43758	0.0574379	1.30289e-06	0.43092	0.249209	1.30289e-06	0.29179	0.34379	1.30289e-06	0.30498	0.0194803	1.30289e-06	0.16606	1.30289e-06	1.30289e-06
AKAP12	0.032023	1.30289e-06	1.30289e-06	0.46704	0.0555173	1.30289e-06	0.21817	1.30289e-06	1.30289e-06	0.4877	0.112476	1.30289e-06	0.32569	0.0194803	1.30289e-06	0.01883	1.30289e-06	1.30289e-06
LGALS3BP	0.023725	1.30289e-06	1.30289e-06	0.46907	0.0555173	1.30289e-06	0.36011	1.30289e-06	1.30289e-06	-0.28965	1.30289e-06	1.30289e-06	0.34582	1.30289e-06	1.30289e-06	0.14345	1.30289e-06	1.30289e-06
RP11-212I21.4	0.19892	1.30289e-06	1.30289e-06	0.74438	0.0551621	1.30289e-06	-0.070763	1.30289e-06	1.30289e-06	0.27622	0.0675836	1.30289e-06	-0.099823	1.30289e-06	1.30289e-06	-0.2191	1.30289e-06	1.30289e-06
ADSL	0.62945	0.18258	1.30289e-06	0.90793	0.0517304	1.30289e-06	-0.86419	1.30289e-06	1.05349	-0.87181	1.30289e-06	1.44138	0.27364	0.163125	1.30289e-06	0.061104	1.30289e-06	1.30289e-06
CHN2	0.29522	0.0351146	1.30289e-06	0.32194	0.0517304	1.30289e-06	0.52436	0.181484	1.30289e-06	0.73365	1.10512	1.30289e-06	0.30659	0.0462659	1.30289e-06	0.4412	0.143507	1.30289e-06
GPBP1	0.28599	0.00855152	1.30289e-06	-0.040315	0.0517304	1.30289e-06	0.24837	1.30289e-06	1.30289e-06	0.077215	1.30289e-06	1.30289e-06	-0.027324	1.30289e-06	1.30289e-06	0.18058	1.30289e-06	1.30289e-06
ESR1	0.019368	0.00850545	1.30289e-06	0.84526	0.0517304	1.30289e-06	0.4704	0.0516379	1.30289e-06	0.45983	0.0873933	1.30289e-06	0.44828	0.189216	1.30289e-06	0.63569	0.164868	1.30289e-06
CTB-49A3.5	0.093901	1.30289e-06	1.30289e-06	0.83563	0.0517304	1.30289e-06	0.059119	1.30289e-06	1.30289e-06	0.26031	0.0277643	1.30289e-06	0.046191	1.30289e-06	1.30289e-06	0.19804	1.30289e-06	1.30289e-06
ENPP7	-0.12566	1.30289e-06	1.30289e-06	0.38538	0.0517304	1.30289e-06	-0.1838	1.30289e-06	1.30289e-06	0.27353	1.30289e-06	1.30289e-06	-0.025364	1.30289e-06	1.30289e-06	-0.19096	1.30289e-06	1.30289e-06
SPATA17	0.29739	1.30289e-06	1.30289e-06	0.22663	0.0517304	1.30289e-06	0.17759	1.30289e-06	1.30289e-06	0.050865	1.30289e-06	1.30289e-06	0.14096	1.30289e-06	1.30289e-06	0.021518	1.30289e-06	1.30289e-06
CPT1A	0.1295	1.30289e-06	1.30289e-06	0.57331	0.0517304	1.30289e-06	-0.015809	1.30289e-06	1.30289e-06	0.12703	1.30289e-06	1.30289e-06	-0.025052	1.30289e-06	1.30289e-06	-0.26853	1.30289e-06	0.272243
ADAP2	0.095388	1.30289e-06	1.30289e-06	0.43862	0.0517304	1.30289e-06	-0.096627	1.30289e-06	1.30289e-06	-0.02841	1.30289e-06	1.30289e-06	0.20782	1.30289e-06	1.30289e-06	0.11247	1.30289e-06	1.30289e-06
ST13	0.56834	0.282661	1.30289e-06	0.46059	0.0507174	1.30289e-06	0.22326	0.0232663	1.30289e-06	-0.087425	1.30289e-06	1.30289e-06	0.72917	1.67189	1.30289e-06	0.61699	0.349954	1.30289e-06
SULT4A1	0.45094	0.304336	1.30289e-06	0.65777	0.0489594	1.30289e-06	0.1217	0.0401895	1.30289e-06	0.017241	1.30289e-06	1.30289e-06	0.49364	0.167561	1.30289e-06	0.15409	0.026505	1.30289e-06
EPS8L2	0.51234	0.0303656	1.30289e-06	0.45979	0.0489594	1.30289e-06	-0.0034017	1.30289e-06	1.30289e-06	0.25547	0.0842388	1.30289e-06	0.093976	0.0194803	1.30289e-06	0.54889	0.120972	1.30289e-06
DHRS3	0.19902	1.30289e-06	1.30289e-06	0.76011	0.0486154	1.30289e-06	0.39024	0.0342552	1.30289e-06	0.49147	0.192234	1.30289e-06	0.022795	1.30289e-06	1.30289e-06	-0.071427	1.30289e-06	1.30289e-06
RNU1-58P	0.21341	1.30289e-06	1.30289e-06	0.39623	0.0486154	1.30289e-06	0.33235	0.0232663	1.30289e-06	0.17082	1.30289e-06	1.30289e-06	0.34419	0.0682168	1.30289e-06	0.75609	0.265713	1.30289e-06
RP11-379F12.3	0.4823	0.00855152	1.30289e-06	0.65275	0.046093	1.30289e-06	0.44638	0.0127691	1.30289e-06	0.34668	0.0285975	1.30289e-06	0.65154	0.114956	1.30289e-06	0.49613	0.026505	1.30289e-06
RNU4-54P	0.11833	1.30289e-06	0.796662	0.65042	0.046093	0.748771	-0.33601	1.30289e-06	0.665731	0.3834	1.30289e-06	0.675053	-0.15097	1.30289e-06	0.627252	-0.29597	1.30289e-06	0.624735
PXN	-0.40241	1.30289e-06	0.344279	0.39057	0.046093	1.30289e-06	-0.45142	1.30289e-06	1.30289e-06	-0.12189	1.30289e-06	1.30289e-06	-0.19014	1.30289e-06	1.30289e-06	-0.54664	1.30289e-06	0.0206497
AC008937.2	-0.15591	1.30289e-06	1.30289e-06	0.42415	0.046093	1.30289e-06	0.20136	1.30289e-06	1.30289e-06	0.17059	1.30289e-06	1.30289e-06	-0.010346	1.30289e-06	1.30289e-06	0.35374	1.30289e-06	1.30289e-06
GDI2	0.17419	1.30289e-06	1.30289e-06	0.51512	0.0459501	1.30289e-06	-0.31711	1.30289e-06	0.23431	0.18983	1.30289e-06	1.30289e-06	-0.17872	1.30289e-06	1.30289e-06	0.31701	1.30289e-06	1.30289e-06
GCAT	0.27937	0.0351146	1.30289e-06	0.17678	0.0448358	1.30289e-06	0.065757	1.30289e-06	1.30289e-06	-0.7131	1.30289e-06	0.698365	0.35085	0.118833	1.30289e-06	-0.14788	1.30289e-06	1.30289e-06
CDH2	0.15934	0.00855152	1.30289e-06	0.53576	0.0448358	1.30289e-06	0.23671	0.00814156	1.30289e-06	0.16274	1.30289e-06	1.30289e-06	0.33158	0.141926	1.30289e-06	0.29016	0.126274	1.30289e-06
RP11-336A10.4	0.10164	1.30289e-06	1.30289e-06	0.5752	0.0448358	1.30289e-06	0.68086	0.183374	1.30289e-06	0.29019	0.327224	1.30289e-06	0.51554	0.358374	1.30289e-06	0.085826	1.30289e-06	1.30289e-06
AC096645.1	0.061139	1.30289e-06	1.30289e-06	0.39998	0.0448358	1.30289e-06	0.58477	0.164406	1.30289e-06	0.52314	0.32193	1.30289e-06	0.044489	1.30289e-06	1.30289e-06	0.25211	0.026505	1.30289e-06
RP11-550I24.2	0.50983	0.123746	1.30289e-06	0.66282	0.0447285	1.30289e-06	0.35823	0.0102548	1.30289e-06	0.60193	0.428602	1.30289e-06	0.40511	0.0194803	1.30289e-06	0.34959	1.30289e-06	1.30289e-06
TSPAN4	0.30899	0.0653783	1.30289e-06	-0.14774	0.0447285	1.30289e-06	0.61186	0.181484	1.30289e-06	-0.19667	1.30289e-06	1.30289e-06	0.56001	0.107299	1.30289e-06	-0.135	1.30289e-06	1.30289e-06
EBLN1	0.012482	1.30289e-06	1.30289e-06	0.60259	0.0441353	1.30289e-06	0.15734	1.30289e-06	1.30289e-06	0.23689	1.30289e-06	1.30289e-06	0.12514	1.30289e-06	1.30289e-06	0.13412	1.30289e-06	1.30289e-06
RP11-53O19.3	0.65768	0.333176	1.30289e-06	0.63885	0.0427755	1.30289e-06	0.022362	1.30289e-06	1.30289e-06	0.009714	1.30289e-06	1.30289e-06	0.33314	0.00602355	1.30289e-06	0.32598	0.0245838	1.30289e-06
RP11-150O12.3	0.71798	0.22469	1.30289e-06	0.3453	0.0427755	1.30289e-06	0.4916	0.0812506	1.30289e-06	0.47981	0.318562	1.30289e-06	0.6213	0.455067	1.30289e-06	0.64535	0.0852687	1.30289e-06
RP1-223E5.4	0.45885	0.147702	1.30289e-06	0.0029072	0.0427755	1.30289e-06	0.39818	0.0726358	1.30289e-06	0.094646	1.30289e-06	1.30289e-06	0.29965	0.00705257	1.30289e-06	0.57014	0.429147	1.30289e-06
KLHDC7A	0.10905	0.139997	1.30289e-06	0.42956	0.0427755	1.30289e-06	0.37233	0.0812506	1.30289e-06	0.2536	1.30289e-06	1.30289e-06	0.32792	0.0462364	1.30289e-06	0.02261	1.30289e-06	1.30289e-06
RP11-144G7.2	0.37858	0.125971	1.30289e-06	0.52792	0.0427755	1.30289e-06	0.0092922	1.30289e-06	1.30289e-06	0.43924	0.0741328	1.30289e-06	0.010335	1.30289e-06	1.30289e-06	0.13632	1.30289e-06	1.30289e-06
CTD-2323K18.1	0.41029	0.0424071	1.30289e-06	0.67655	0.0427755	1.30289e-06	-0.29516	1.30289e-06	1.30289e-06	-0.04126	1.30289e-06	0.0377993	-0.046888	1.30289e-06	1.30289e-06	0.18718	1.30289e-06	1.30289e-06
PPIL3	0.0052256	1.30289e-06	1.30289e-06	0.31541	0.0427755	1.30289e-06	0.39887	0.0769084	1.30289e-06	0.52948	0.341538	1.30289e-06	0.033056	1.30289e-06	1.30289e-06	0.37516	0.0494589	1.30289e-06
PLEKHA1	-0.062981	1.30289e-06	1.30289e-06	0.68078	0.0427755	1.30289e-06	0.56971	0.0652062	1.30289e-06	0.83724	0.722405	1.30289e-06	0.23556	0.0194803	1.30289e-06	0.2248	0.026505	1.30289e-06
PFKFB3	-0.16917	1.30289e-06	1.30289e-06	0.041426	0.0427755	1.30289e-06	0.15214	0.00814156	1.30289e-06	0.18501	1.30289e-06	1.30289e-06	0.44398	0.00713159	1.30289e-06	0.16261	0.0630512	1.30289e-06
RP11-571L19.8	0.095342	1.30289e-06	1.30289e-06	0.42852	0.0427755	1.30289e-06	0.26567	0.00814156	1.30289e-06	0.039923	1.30289e-06	1.30289e-06	0.22909	0.00713159	1.30289e-06	0.086238	0.024147	1.30289e-06
TMEM101	-0.022876	1.30289e-06	1.30289e-06	0.5895	0.0427755	1.30289e-06	-0.090933	1.30289e-06	1.30289e-06	0.35392	0.397627	1.30289e-06	-0.079904	1.30289e-06	1.30289e-06	0.045025	1.30289e-06	1.30289e-06
MAP3K14-AS1	-0.30484	1.30289e-06	0.0126019	0.2174	0.0427755	1.30289e-06	0.14342	1.30289e-06	1.30289e-06	0.38911	0.00470623	1.30289e-06	0.24299	1.30289e-06	1.30289e-06	-0.33487	1.30289e-06	1.30289e-06
NXNL1	-0.43367	1.30289e-06	1.30289e-06	-0.095326	0.0427755	1.30289e-06	-0.42127	1.30289e-06	1.30289e-06	-0.51385	1.30289e-06	0.0404144	-0.43653	1.30289e-06	1.30289e-06	-0.19741	1.30289e-06	1.30289e-06
JUND	-0.30641	1.30289e-06	1.30289e-06	0.26816	0.0427755	1.30289e-06	-0.026115	1.30289e-06	1.30289e-06	-0.10302	1.30289e-06	1.30289e-06	0.016284	1.30289e-06	1.30289e-06	0.059147	1.30289e-06	1.30289e-06
EDN1	0.37479	0.051324	1.30289e-06	0.378	0.0411228	1.30289e-06	0.29117	0.00954082	1.30289e-06	0.51893	0.436898	1.30289e-06	0.7334	0.442558	1.30289e-06	0.69433	0.589508	1.30289e-06
VASP	0.084258	0.00855152	1.30289e-06	0.30838	0.0411228	1.30289e-06	0.070906	1.30289e-06	1.30289e-06	0.051604	1.30289e-06	1.30289e-06	-0.11688	1.30289e-06	1.30289e-06	0.24343	1.30289e-06	1.30289e-06
PBX4	-0.27026	0.00370684	0.085227	0.17856	0.0411228	1.30289e-06	0.36348	0.0623247	1.30289e-06	-0.46394	1.30289e-06	1.30289e-06	-0.25323	1.30289e-06	1.30289e-06	0.2477	0.0234368	1.30289e-06
SRL	0.28173	1.30289e-06	1.30289e-06	0.48126	0.0411228	1.30289e-06	0.84715	0.181484	1.30289e-06	-0.59984	1.30289e-06	0.761771	0.4447	0.132362	1.30289e-06	0.41099	0.026505	1.30289e-06
APOBEC3B-AS1	0.088979	1.30289e-06	1.30289e-06	0.63018	0.0411228	1.30289e-06	0.4412	1.30289e-06	1.30289e-06	-0.87153	1.30289e-06	0.85271	0.54037	0.296282	1.30289e-06	0.18988	1.30289e-06	1.30289e-06
ARL17A	-0.021423	1.30289e-06	1.30289e-06	0.34364	0.0411228	1.30289e-06	0.15524	1.30289e-06	1.30289e-06	0.066292	1.30289e-06	1.30289e-06	-0.032046	1.30289e-06	1.30289e-06	0.089578	1.30289e-06	1.30289e-06
TAPBPL	0.088701	0.0875351	1.30289e-06	-0.18795	0.0402657	1.30289e-06	0.20481	1.30289e-06	1.30289e-06	-0.24423	1.30289e-06	1.30289e-06	0.29549	0.0194803	1.30289e-06	-0.21179	1.30289e-06	1.30289e-06
SLC26A1	0.3924	0.0303656	1.30289e-06	0.43409	0.0388182	1.30289e-06	0.082724	1.30289e-06	1.30289e-06	0.20356	0.00634998	1.30289e-06	0.31518	0.0194803	1.30289e-06	-0.13628	1.30289e-06	1.30289e-06
CD151	0.072	1.30289e-06	1.30289e-06	0.60709	0.0388182	1.30289e-06	-0.19447	1.30289e-06	0.245579	-0.24222	1.30289e-06	0.301485	-1.1153	1.30289e-06	1.63592	-1.1241	1.30289e-06	1.79951
RP4-591N18.2	0.27564	0.204324	1.30289e-06	0.69129	0.0381979	1.30289e-06	0.76072	0.181484	1.30289e-06	0.18173	1.30289e-06	1.30289e-06	0.73661	0.168661	1.30289e-06	0.61636	0.0732631	1.30289e-06
ZNRF3	0.42313	0.0419285	1.30289e-06	0.63551	0.0381979	1.30289e-06	0.57181	0.183374	1.30289e-06	0.37789	0.173956	1.30289e-06	0.60553	0.342607	1.30289e-06	0.54529	0.185662	1.30289e-06
RP11-552O4.1	0.15998	1.30289e-06	1.30289e-06	0.56026	0.0381979	1.30289e-06	0.48583	0.0812506	1.30289e-06	0.55212	0.0873933	1.30289e-06	0.20288	1.30289e-06	1.30289e-06	0.37603	0.00258129	1.30289e-06
RP13-463N16.6	0.37775	0.0653783	0.180799	0.35604	0.0360257	1.30289e-06	0.45688	0.181484	0.123891	0.52015	0.318562	0.214111	-0.25025	1.30289e-06	0.0306069	0.26182	1.30289e-06	0.097118
RP11-863K10.2	0.35206	0.0351146	1.30289e-06	0.44553	0.0360257	1.30289e-06	0.5373	0.170481	1.30289e-06	0.19745	0.00769175	1.30289e-06	0.62752	0.182684	1.30289e-06	0.71428	0.163689	1.30289e-06
HPSE	0.30708	0.00224807	1.30289e-06	0.67255	0.0360257	1.30289e-06	-0.3052	1.30289e-06	1.30289e-06	0.3006	0.0109531	1.30289e-06	-0.12942	1.30289e-06	1.30289e-06	0.45387	0.0494589	1.30289e-06
BORCS8-MEF2B	-0.1875	1.30289e-06	1.30289e-06	0.72515	0.0360257	1.30289e-06	-0.47789	1.30289e-06	0.0123378	-1.1883	1.30289e-06	0.229135	-0.81168	1.30289e-06	0.11865	0.11623	1.30289e-06	1.30289e-06
CTD-3032H12.2	0.21108	1.30289e-06	1.30289e-06	0.32285	0.0349682	1.30289e-06	0.29127	0.00814156	1.30289e-06	0.5231	0.417815	1.30289e-06	0.24854	0.00705257	1.30289e-06	0.19307	1.30289e-06	1.30289e-06
IL15RA	-0.14979	1.30289e-06	1.30289e-06	0.29789	0.0346365	1.30289e-06	0.36158	0.181484	1.30289e-06	0.56448	0.428602	1.30289e-06	0.35376	0.0814575	1.30289e-06	0.37096	0.164868	1.30289e-06
OR2A7	-0.43601	1.30289e-06	1.30289e-06	-0.31042	0.0346365	1.30289e-06	0.3755	0.0812506	1.30289e-06	0.37581	0.0409324	1.30289e-06	0.12294	1.30289e-06	1.30289e-06	0.40879	0.143507	1.30289e-06
RP11-1082L8.4	0.55011	0.220867	1.30289e-06	0.29549	0.0310102	1.30289e-06	0.3441	0.181484	1.30289e-06	0.47604	0.393293	1.30289e-06	0.75701	0.423603	1.30289e-06	0.37244	0.143507	1.30289e-06
CTD-2659N19.10	-0.17954	1.30289e-06	1.30289e-06	0.28778	0.0310102	1.30289e-06	0.080609	1.30289e-06	1.30289e-06	0.042988	1.30289e-06	1.30289e-06	0.20948	1.30289e-06	1.30289e-06	-0.21686	1.30289e-06	1.30289e-06
NSUN2	0.34426	0.147702	1.30289e-06	0.44977	0.0305044	1.30289e-06	0.29147	1.30289e-06	1.30289e-06	-0.21632	1.30289e-06	0.138165	0.085785	1.30289e-06	1.30289e-06	0.20999	1.30289e-06	1.30289e-06
AKR1C8P	0.46424	0.139997	1.30289e-06	0.40221	0.0305044	1.30289e-06	0.68599	0.281585	1.30289e-06	0.49451	0.310537	1.30289e-06	0.90327	0.54327	1.30289e-06	0.029431	0.0494589	1.30289e-06
TLR10	0.34986	0.0458255	1.30289e-06	0.49066	0.0305044	1.30289e-06	0.1293	1.30289e-06	1.30289e-06	0.31477	0.362337	1.30289e-06	0.23913	1.30289e-06	1.30289e-06	0.017757	1.30289e-06	1.30289e-06
RNA5SP264	0.0040714	1.30289e-06	1.30289e-06	0.2992	0.0305044	1.30289e-06	0.86005	0.200718	1.30289e-06	-0.0251	1.30289e-06	0.0519457	0.31669	1.30289e-06	1.30289e-06	0.14857	1.30289e-06	1.30289e-06
SLC25A17	0.1536	1.30289e-06	1.30289e-06	0.36341	0.0305044	1.30289e-06	0.28948	0.00868973	1.30289e-06	-0.52358	1.30289e-06	0.298995	0.14541	0.180864	1.30289e-06	0.27097	0.164868	1.30289e-06
FAM208B	0.39096	1.30289e-06	1.30289e-06	0.58205	0.0305044	1.30289e-06	0.12674	1.30289e-06	1.30289e-06	0.29691	0.272576	1.30289e-06	0.038798	1.30289e-06	1.30289e-06	0.24396	0.026505	1.30289e-06
SAMSN1	-0.042806	1.30289e-06	1.30289e-06	0.58353	0.0305044	1.30289e-06	0.023559	1.30289e-06	1.30289e-06	0.11354	1.30289e-06	1.30289e-06	0.14551	0.0296001	1.30289e-06	0.24026	0.026505	1.30289e-06
GTPBP1	0.079364	1.30289e-06	1.30289e-06	0.30396	0.0305044	1.30289e-06	0.16381	1.30289e-06	1.30289e-06	-0.60998	1.30289e-06	1.04294	0.42451	0.121879	1.30289e-06	0.2804	0.0262793	1.30289e-06
FKBP8	-0.20333	1.30289e-06	1.30289e-06	0.19577	0.0305044	1.30289e-06	-0.19351	1.30289e-06	1.30289e-06	-0.76766	1.30289e-06	1.8553	-0.66227	1.30289e-06	0.920218	-0.048225	1.30289e-06	1.30289e-06
PITPNB	0.15592	1.30289e-06	1.30289e-06	0.42709	0.0305044	1.30289e-06	-0.53176	1.30289e-06	0.495238	0.19778	1.30289e-06	1.30289e-06	-0.22951	1.30289e-06	1.30289e-06	-0.19272	1.30289e-06	1.30289e-06
CTD-2552K11.2	0.44677	0.392106	1.30289e-06	0.54412	0.0302794	1.30289e-06	0.3762	0.027457	1.30289e-06	0.51876	0.318562	1.30289e-06	0.55083	0.306714	1.30289e-06	0.38379	0.0732631	1.30289e-06
RP11-419C23.1	0.48173	0.220867	1.30289e-06	0.28655	0.0302794	1.30289e-06	0.57057	0.474042	1.30289e-06	0.55827	0.374675	1.30289e-06	0.46077	0.423603	1.30289e-06	0.80268	1.87602	1.30289e-06
SP3	0.62915	0.220867	1.30289e-06	0.54105	0.0302794	1.30289e-06	0.26069	0.0313714	1.30289e-06	0.29879	0.144646	1.30289e-06	-0.6041	1.30289e-06	0.568606	0.36546	0.0965654	1.30289e-06
RASSF7	0.4517	0.220867	1.30289e-06	0.1891	0.0302794	1.30289e-06	0.24939	1.30289e-06	1.30289e-06	-0.098377	1.30289e-06	1.30289e-06	0.20329	0.167561	1.30289e-06	0.83974	0.429147	1.30289e-06
HCG14	0.50539	0.203152	1.30289e-06	0.6118	0.0302794	1.30289e-06	-0.084338	1.30289e-06	1.30289e-06	0.20693	1.30289e-06	1.30289e-06	0.4528	0.0918411	1.30289e-06	0.41033	0.164868	1.30289e-06
HIPK1	0.24361	0.0351146	1.30289e-06	0.44838	0.0302794	1.30289e-06	0.5324	0.183374	1.30289e-06	-0.065125	1.30289e-06	1.30289e-06	0.26307	0.0682168	1.30289e-06	0.28388	0.246179	1.30289e-06
NMNAT1	0.514	0.0351146	1.30289e-06	0.62211	0.0302794	1.30289e-06	0.14497	1.30289e-06	1.30289e-06	-0.35185	1.30289e-06	0.724322	0.22438	1.30289e-06	1.30289e-06	0.4244	0.163689	1.30289e-06
TMEM237	0.27836	0.0303656	1.30289e-06	0.34661	0.0302794	1.30289e-06	0.19672	1.30289e-06	1.30289e-06	0.60933	0.482391	1.30289e-06	0.027272	1.30289e-06	1.30289e-06	0.31668	1.30289e-06	1.30289e-06
TSTA3	0.17804	0.0267534	1.30289e-06	0.50404	0.0302794	1.30289e-06	-0.098761	1.30289e-06	1.30289e-06	0.23131	1.30289e-06	1.30289e-06	0.14562	0.00713159	1.30289e-06	0.23466	0.026505	1.30289e-06
DNAJC1	0.23657	0.00855152	1.30289e-06	0.43104	0.0302794	1.30289e-06	0.33421	0.0726358	1.30289e-06	0.45988	0.193599	1.30289e-06	0.31297	1.30289e-06	1.30289e-06	0.36767	0.026505	1.30289e-06
RN7SKP201	0.21303	0.00224807	1.30289e-06	0.65756	0.0302794	1.30289e-06	0.64573	0.324071	1.30289e-06	0.33078	0.1003	1.30289e-06	0.26647	0.00705257	1.30289e-06	-0.023416	1.30289e-06	1.30289e-06
XPNPEP3	0.22468	0.00224807	1.30289e-06	0.26453	0.0302794	1.30289e-06	0.010376	1.30289e-06	1.30289e-06	-1.0203	1.30289e-06	0.752658	0.13466	0.00831771	1.30289e-06	0.37817	0.138966	1.30289e-06
PVR	0.035436	1.30289e-06	1.30289e-06	0.38919	0.0302794	1.30289e-06	0.59904	0.625116	1.30289e-06	0.54093	0.494083	1.30289e-06	0.39837	0.0194803	1.30289e-06	0.28323	0.026505	1.30289e-06
ALS2CR11	-0.056625	1.30289e-06	1.30289e-06	0.41579	0.0302794	1.30289e-06	0.2909	0.0726358	1.30289e-06	0.574	0.318562	1.30289e-06	0.15776	1.30289e-06	1.30289e-06	0.017747	1.30289e-06	1.30289e-06
IFT172	0.12588	1.30289e-06	1.30289e-06	0.035181	0.0302794	1.30289e-06	0.46858	0.0342552	1.30289e-06	0.69439	0.320136	1.30289e-06	-0.12124	1.30289e-06	1.30289e-06	-0.13371	1.30289e-06	1.30289e-06
CMSS1	0.19729	1.30289e-06	1.30289e-06	0.56431	0.0302794	1.30289e-06	0.29564	0.0313714	1.30289e-06	0.33455	0.118254	1.30289e-06	0.43383	0.0919248	1.30289e-06	0.32753	0.026505	1.30289e-06
RP11-322N21.2	-0.019119	1.30289e-06	1.30289e-06	0.21205	0.0302794	1.30289e-06	0.19324	0.0313714	1.30289e-06	-0.13375	1.30289e-06	1.30289e-06	0.12136	1.30289e-06	1.30289e-06	0.34498	1.30289e-06	1.30289e-06
CCDC91	0.1983	1.30289e-06	1.30289e-06	-0.023115	0.0302794	1.30289e-06	0.32322	0.027457	1.30289e-06	0.80906	0.362337	1.30289e-06	0.54657	0.107227	1.30289e-06	0.47036	0.143507	1.30289e-06
COL26A1	-0.36868	1.30289e-06	1.30289e-06	0.69486	0.0302794	1.30289e-06	0.094609	0.00213066	1.30289e-06	-0.063592	1.30289e-06	1.30289e-06	0.26826	1.30289e-06	1.30289e-06	0.40026	0.0238202	1.30289e-06
RP1-69D17.3	0.17129	1.30289e-06	1.30289e-06	0.57226	0.0302794	1.30289e-06	0.13246	1.30289e-06	1.30289e-06	0.80356	0.535101	1.30289e-06	0.45224	0.167561	1.30289e-06	0.49655	0.470575	1.30289e-06
GSTM1	0.14507	1.30289e-06	1.30289e-06	0.60736	0.0302794	1.30289e-06	0.20426	1.30289e-06	1.30289e-06	0.13979	0.064532	1.30289e-06	0.26971	1.30289e-06	1.30289e-06	0.16817	1.30289e-06	1.30289e-06
C1QTNF1	-0.11856	1.30289e-06	1.30289e-06	0.83937	0.0302794	1.30289e-06	0.11879	1.30289e-06	1.30289e-06	0.51028	0.0285975	1.30289e-06	0.062486	0.00713159	1.30289e-06	0.61719	0.026505	1.30289e-06
TCF7L2	-0.10347	1.30289e-06	1.30289e-06	0.57218	0.0302794	1.30289e-06	0.13459	1.30289e-06	1.30289e-06	0.33991	1.30289e-06	1.30289e-06	0.35978	1.30289e-06	1.30289e-06	0.49244	0.185662	1.30289e-06
SLC38A10	0.31421	1.30289e-06	1.30289e-06	0.66166	0.0302794	1.30289e-06	0.34358	1.30289e-06	1.30289e-06	0.037897	1.30289e-06	1.30289e-06	-0.30515	1.30289e-06	1.30289e-06	0.57003	0.163689	1.30289e-06
RTBDN	0.42634	1.30289e-06	1.30289e-06	0.45392	0.0302794	1.30289e-06	0.15791	1.30289e-06	1.30289e-06	-0.26529	1.30289e-06	0.214111	0.13318	1.30289e-06	1.30289e-06	0.27728	0.0494589	1.30289e-06
CTA-292E10.6	-0.070122	1.30289e-06	1.30289e-06	0.1405	0.0302794	1.30289e-06	0.15917	1.30289e-06	1.30289e-06	-0.036613	1.30289e-06	1.30289e-06	0.33144	0.0194803	1.30289e-06	0.095545	1.30289e-06	1.30289e-06
ALK	0.25823	1.30289e-06	1.30289e-06	0.45172	0.0302794	1.30289e-06	-0.27012	1.30289e-06	1.30289e-06	0.2689	1.30289e-06	1.30289e-06	0.24569	1.30289e-06	1.30289e-06	0.26955	1.30289e-06	1.30289e-06
RAD51B	0.31008	0.00855152	1.30289e-06	0.16341	0.0302147	1.30289e-06	-0.39	1.30289e-06	0.337703	-0.5079	1.30289e-06	0.94091	-0.62927	1.30289e-06	0.0364058	-0.40883	1.30289e-06	1.30289e-06
RP11-14D22.1	0.65073	0.147702	1.30289e-06	0.37229	0.0301537	1.30289e-06	0.57786	0.0313714	1.30289e-06	0.5904	0.0501598	1.30289e-06	0.12347	1.30289e-06	1.30289e-06	1.0904	0.328535	1.30289e-06
ZSCAN31	0.40642	0.0351146	1.30289e-06	0.82572	0.0301537	1.30289e-06	0.68497	0.474042	1.30289e-06	0.32186	0.0256435	1.30289e-06	0.64659	0.201791	1.30289e-06	0.6175	0.716959	1.30289e-06
EVI2B	0.21984	1.30289e-06	1.30289e-06	0.21046	0.0301537	1.30289e-06	0.3707	0.183374	1.30289e-06	0.38954	0.148958	1.30289e-06	0.2166	0.00705257	1.30289e-06	0.18562	0.0732631	1.30289e-06
IRGQ	0.56934	0.0419285	1.30289e-06	0.2878	0.0275269	1.30289e-06	0.56367	0.170481	1.30289e-06	-0.045091	1.30289e-06	1.30289e-06	0.048401	1.30289e-06	1.30289e-06	0.141	1.30289e-06	1.30289e-06
CTD-2196P11.2	-0.11348	1.30289e-06	1.30289e-06	0.069438	0.0275269	1.30289e-06	0.30421	1.30289e-06	1.30289e-06	0.12401	1.30289e-06	1.30289e-06	0.8042	0.38081	1.30289e-06	0.44889	0.0494589	1.30289e-06
MUC6	0.28832	1.30289e-06	1.30289e-06	0.37241	0.0267733	1.30289e-06	0.56169	0.0313714	1.30289e-06	-0.086395	1.30289e-06	1.30289e-06	0.51971	0.0834455	1.30289e-06	0.27543	1.30289e-06	1.30289e-06
RP5-933E2.1	0.30072	0.185731	1.30289e-06	0.5072	0.0266495	1.30289e-06	0.41025	0.074056	1.30289e-06	0.55012	0.304615	1.30289e-06	0.18365	0.000675854	1.30289e-06	0.23237	0.0537605	1.30289e-06
NIF3L1	0.45704	0.0336212	1.30289e-06	0.023334	0.0266495	1.30289e-06	-0.30994	1.30289e-06	1.30289e-06	0.91792	0.584875	1.30289e-06	0.13303	0.115996	1.30289e-06	-0.32036	1.30289e-06	1.30289e-06
RP11-486M23.2	0.31862	0.0305505	1.30289e-06	0.49661	0.0266495	1.30289e-06	-0.10305	1.30289e-06	1.30289e-06	0.32683	0.124539	1.30289e-06	0.25992	0.00602355	1.30289e-06	-0.17673	1.30289e-06	0.100809
SNORD14	0.31356	0.0290314	1.30289e-06	0.49611	0.0266495	1.30289e-06	0.01563	1.30289e-06	1.30289e-06	0.4504	0.0799602	1.30289e-06	-0.24819	1.30289e-06	1.30289e-06	0.31044	1.30289e-06	1.30289e-06
MIR92B	-0.083145	0.00855152	0.0335715	0.027911	0.0266495	1.30289e-06	0.3455	1.30289e-06	1.30289e-06	-0.89481	1.30289e-06	0.0944734	0.16606	1.30289e-06	1.30289e-06	0.040224	0.0115298	1.30289e-06
C11orf44	0.12888	1.30289e-06	1.30289e-06	0.37069	0.0266495	1.30289e-06	0.5502	0.181484	1.30289e-06	-0.068298	1.30289e-06	1.30289e-06	0.30916	1.30289e-06	1.30289e-06	0.40895	0.026505	1.30289e-06
AC005162.5	0.1508	1.30289e-06	1.30289e-06	0.45134	0.0266495	1.30289e-06	0.45445	0.0726358	1.30289e-06	0.53702	0.362337	1.30289e-06	0.21687	1.30289e-06	1.30289e-06	-0.17935	1.30289e-06	1.30289e-06
ZNF714	0.065227	1.30289e-06	1.30289e-06	0.55758	0.0266495	1.30289e-06	0.21842	0.0544605	1.30289e-06	-0.2351	1.30289e-06	1.30289e-06	-0.1314	0.0852962	1.30289e-06	-0.067842	1.30289e-06	1.30289e-06
RP11-317O24.2	0.30314	1.30289e-06	1.30289e-06	0.21268	0.0266495	1.30289e-06	0.30774	0.0518179	1.30289e-06	0.42072	0.2927	1.30289e-06	0.047213	0.0682168	1.30289e-06	-0.071998	1.30289e-06	1.30289e-06
PTGER1	0.3869	1.30289e-06	1.30289e-06	0.6488	0.0266495	1.30289e-06	0.55061	0.0454141	1.30289e-06	-0.10502	1.30289e-06	1.30289e-06	0.097148	1.30289e-06	1.30289e-06	0.57698	0.0877142	1.30289e-06
WDR66	0.17806	1.30289e-06	1.30289e-06	-0.43052	0.0266495	0.351549	0.015465	1.30289e-06	1.30289e-06	0.054429	1.30289e-06	1.30289e-06	0.24475	0.00831771	1.30289e-06	0.31918	0.026505	1.30289e-06
TMEM184B	0.18288	1.30289e-06	1.30289e-06	0.39566	0.0266495	1.30289e-06	0.27612	1.30289e-06	1.30289e-06	-0.71182	1.30289e-06	0.576631	-0.062918	1.30289e-06	1.30289e-06	0.339	1.30289e-06	1.30289e-06
TRMT12	0.020738	1.30289e-06	1.30289e-06	0.4072	0.0266495	1.30289e-06	0.24795	1.30289e-06	1.30289e-06	0.11102	1.30289e-06	1.30289e-06	0.018493	1.30289e-06	1.30289e-06	-0.23523	1.30289e-06	1.30289e-06
CHML	0.22816	1.30289e-06	1.30289e-06	0.71619	0.0266495	1.30289e-06	0.10961	1.30289e-06	1.30289e-06	0.20231	1.30289e-06	1.30289e-06	0.051201	1.30289e-06	1.30289e-06	0.060702	1.30289e-06	1.30289e-06
C19orf60	0.052289	1.30289e-06	1.30289e-06	0.54439	0.0266495	1.30289e-06	-0.026368	1.30289e-06	1.30289e-06	-0.10529	1.30289e-06	1.30289e-06	-0.043881	1.30289e-06	1.30289e-06	-0.074897	1.30289e-06	1.30289e-06
GDF15	-0.21314	1.30289e-06	1.30289e-06	0.2132	0.0266495	1.30289e-06	0.13088	1.30289e-06	1.30289e-06	-0.46057	1.30289e-06	0.191572	0.18928	1.30289e-06	1.30289e-06	0.14705	1.30289e-06	1.30289e-06
SLC6A2	0.15228	1.30289e-06	1.30289e-06	0.37148	0.0260316	1.30289e-06	0.0015127	1.30289e-06	1.30289e-06	0.20299	1.30289e-06	1.30289e-06	0.26895	1.30289e-06	1.30289e-06	0.35608	1.30289e-06	1.30289e-06
B2M	0.37604	0.347468	1.30289e-06	0.29156	0.0258887	1.30289e-06	0.45058	0.164406	1.30289e-06	-0.072675	0.183476	1.30289e-06	0.23199	0.0502802	1.30289e-06	0.14637	0.026505	1.30289e-06
RN7SL365P	0.35425	0.220867	1.30289e-06	0.42559	0.0258887	1.30289e-06	0.0098447	1.30289e-06	1.30289e-06	0.19616	1.30289e-06	1.30289e-06	0.2178	1.30289e-06	1.30289e-06	0.087138	1.30289e-06	1.30289e-06
MCC	0.22131	0.00855152	1.30289e-06	0.22033	0.0258887	1.30289e-06	0.08197	1.30289e-06	1.30289e-06	0.34959	1.30289e-06	1.30289e-06	0.01363	1.30289e-06	1.30289e-06	0.50806	0.0723125	1.30289e-06
IRX6	0.1846	1.30289e-06	1.30289e-06	0.47989	0.0258887	1.30289e-06	0.79409	0.324071	1.30289e-06	0.13781	0.0819356	1.30289e-06	0.27488	0.0194803	1.30289e-06	0.24411	0.0331565	1.30289e-06
PRSS46	-0.065568	1.30289e-06	1.30289e-06	-0.10092	0.0258887	1.30289e-06	0.36451	0.0130327	1.30289e-06	0.053083	1.30289e-06	1.30289e-06	0.43726	0.00713159	1.30289e-06	0.26008	1.30289e-06	1.30289e-06
FILIP1L	0.071166	1.30289e-06	1.30289e-06	0.35871	0.0258887	1.30289e-06	0.37862	0.00868973	1.30289e-06	0.48417	0.417453	1.30289e-06	0.24392	1.30289e-06	1.30289e-06	0.35925	0.0115298	1.30289e-06
AC005013.5	0.40219	0.00855152	1.30289e-06	0.45209	0.0251739	1.30289e-06	0.22037	0.0362301	1.30289e-06	0.39775	0.313379	1.30289e-06	0.10439	1.30289e-06	1.30289e-06	0.55793	0.429147	1.30289e-06
RP11-563J2.2	-0.11576	1.30289e-06	1.03787	0.31393	0.0251739	0.939714	-0.067787	0.00814156	0.853357	0.14764	1.30289e-06	0.752921	0.18682	1.30289e-06	0.880899	-0.0054008	1.30289e-06	0.948898
TRIP6	0.39072	0.0653783	1.30289e-06	0.62015	0.0247994	1.30289e-06	0.37201	0.249209	1.30289e-06	0.16347	0.00470623	1.30289e-06	0.61403	0.306714	1.30289e-06	1.3786	3.34679	1.30289e-06
HDDC3	0.21212	0.0653783	1.30289e-06	0.0099365	0.0247994	1.30289e-06	0.43663	0.12053	1.30289e-06	0.11965	1.30289e-06	1.30289e-06	0.70899	0.304961	1.30289e-06	0.34583	0.026505	1.30289e-06
CTD-2325P2.4	0.53751	0.00855152	1.30289e-06	0.42079	0.0247994	1.30289e-06	0.3904	0.00140373	1.30289e-06	0.19377	0.0842388	1.30289e-06	0.00369	1.30289e-06	1.30289e-06	-0.0063099	1.30289e-06	1.30289e-06
TRIP13	0.19363	0.00335876	1.30289e-06	0.61564	0.0247994	1.30289e-06	0.35378	1.30289e-06	1.30289e-06	-1.1269	1.30289e-06	0.942532	0.17911	1.30289e-06	1.30289e-06	0.41013	0.213551	1.30289e-06
AC068831.6	0.15548	0.00224807	1.30289e-06	0.67922	0.0247994	1.30289e-06	-0.30779	1.30289e-06	0.169025	0.063234	1.30289e-06	1.30289e-06	-0.073741	1.30289e-06	1.30289e-06	0.043213	1.30289e-06	1.30289e-06
ID4	0.018721	1.30289e-06	1.30289e-06	0.40697	0.0247994	1.30289e-06	-0.021125	0.181484	1.30289e-06	0.55154	0.323835	1.30289e-06	0.92784	0.118833	1.30289e-06	0.47745	0.429147	1.30289e-06
ARHGEF34P	0.11622	1.30289e-06	1.30289e-06	0.56161	0.0247994	1.30289e-06	0.27978	0.156827	1.30289e-06	0.48904	0.289472	1.30289e-06	0.36771	1.30289e-06	1.30289e-06	0.86385	0.502455	1.30289e-06
MAN2C1	0.22158	1.30289e-06	1.30289e-06	0.17349	0.0247994	1.30289e-06	0.2409	0.0983499	1.30289e-06	0.21105	1.30289e-06	1.30289e-06	0.44902	0.0776234	1.30289e-06	0.43634	0.163689	1.30289e-06
SAMD9	-0.012215	1.30289e-06	1.30289e-06	0.28357	0.0247994	1.30289e-06	0.30296	0.079978	1.30289e-06	0.41502	0.362337	1.30289e-06	0.38027	0.0972201	1.30289e-06	0.45693	0.0864998	1.30289e-06
SLC14A2	0.34033	1.30289e-06	1.30289e-06	0.65428	0.0247994	1.30289e-06	0.041193	1.30289e-06	1.30289e-06	0.29943	0.2927	1.30289e-06	-0.58426	0.00705257	1.30289e-06	0.011345	1.30289e-06	1.30289e-06
RP11-1055B8.4	0.28733	1.30289e-06	1.30289e-06	0.70843	0.0247994	1.30289e-06	0.14054	1.30289e-06	1.30289e-06	0.38366	0.0522625	1.30289e-06	0.81288	0.167561	1.30289e-06	0.35302	0.026505	1.30289e-06
BECN1	-0.15844	1.30289e-06	0.0164738	-0.018671	0.0247994	1.30289e-06	-0.3067	1.30289e-06	1.30289e-06	-0.26741	1.30289e-06	1.30289e-06	-0.23237	0.0442863	0.00144556	-0.59558	1.30289e-06	0.131261
ARRDC3-AS1	-0.19694	1.30289e-06	1.30289e-06	-0.61758	0.0247994	1.30289e-06	0.040886	1.30289e-06	1.30289e-06	0.21196	1.30289e-06	1.30289e-06	-0.13818	0.0194803	1.30289e-06	-0.25706	1.30289e-06	1.30289e-06
AC007566.10	-0.064296	1.30289e-06	1.30289e-06	0.34292	0.0247994	1.30289e-06	-0.097132	1.30289e-06	1.30289e-06	0.10823	1.30289e-06	1.30289e-06	-0.29093	1.30289e-06	0.0948001	0.068778	1.30289e-06	1.30289e-06
POLR3GL	0.097422	1.30289e-06	1.30289e-06	-0.34338	0.0247994	1.30289e-06	0.12587	1.30289e-06	1.30289e-06	-0.10665	1.30289e-06	1.30289e-06	0.056433	1.30289e-06	1.30289e-06	0.089559	1.30289e-06	1.30289e-06
MIR3155A	0.20367	0.00370684	1.30289e-06	0.45087	0.0247098	1.30289e-06	0.42022	0.0905986	1.30289e-06	0.84143	0.320136	1.30289e-06	0.34888	0.115996	1.30289e-06	0.45219	0.0531932	1.30289e-06
HIST1H4L	0.02823	0.00224807	1.30289e-06	0.55131	0.0247098	1.30289e-06	0.11309	1.30289e-06	1.30289e-06	0.26033	0.0375369	1.30289e-06	0.5526	0.149805	1.30289e-06	0.42497	0.026505	1.30289e-06
CTD-2176I21.2	0.10393	1.30289e-06	1.30289e-06	0.38789	0.0247098	1.30289e-06	0.6202	0.575156	1.30289e-06	0.34557	0.0184904	1.30289e-06	0.037439	0.05039	1.30289e-06	0.14385	1.30289e-06	1.30289e-06
RP11-1024P17.1	0.1553	1.30289e-06	1.30289e-06	0.33995	0.0247098	1.30289e-06	0.35703	0.181484	1.30289e-06	0.40205	0.32193	1.30289e-06	-0.078088	1.30289e-06	1.30289e-06	0.2579	0.026505	1.30289e-06
RNU6-813P	-1.0227	1.30289e-06	0.203727	-1.1867	0.0247098	0.238717	-1.7553	0.0485522	0.291271	-2.294	0.361173	0.37373	-0.66599	0.129529	0.0724295	-1.0303	0.026505	0.20235
KANSL1-AS1	-0.040167	1.30289e-06	1.30289e-06	0.18942	0.0247098	1.30289e-06	0.40884	0.0266421	1.30289e-06	0.10309	1.30289e-06	1.30289e-06	0.47522	0.0194803	1.30289e-06	0.039556	1.30289e-06	1.30289e-06
ABRAXAS1	0.19045	1.30289e-06	1.30289e-06	0.829	0.0247098	1.30289e-06	0.23628	0.0102548	1.30289e-06	0.1392	1.30289e-06	1.30289e-06	-0.22166	1.30289e-06	0.132064	0.16961	0.0681589	1.30289e-06
AC005037.3	0.1003	1.30289e-06	1.30289e-06	-0.27171	0.0247098	1.30289e-06	-0.27164	1.30289e-06	1.30289e-06	0.65323	0.364867	1.30289e-06	0.15726	1.30289e-06	1.30289e-06	0.4881	0.0734461	1.30289e-06
CTD-2265O21.7	-0.16013	1.30289e-06	1.30289e-06	0.44	0.0247098	1.30289e-06	-0.29453	1.30289e-06	1.30289e-06	-0.82382	1.30289e-06	0.834607	0.35513	0.0502802	1.30289e-06	-0.31571	1.30289e-06	1.30289e-06
MTHFD1L	-0.19786	1.30289e-06	1.30289e-06	0.11967	0.0247098	1.30289e-06	-0.024545	1.30289e-06	1.30289e-06	0.13064	1.30289e-06	1.30289e-06	0.31693	0.00312861	1.30289e-06	-0.14808	1.30289e-06	1.30289e-06
UPF1	-2.0014	1.30289e-06	0.681878	-0.05966	0.0246826	0.546041	-2.4762	1.30289e-06	1.65318	-2.3327	1.30289e-06	1.32857	-2.4021	1.30289e-06	1.63592	-1.633	1.30289e-06	1.02821
PILRB	-0.10108	1.30289e-06	1.30289e-06	-0.24454	0.0243293	1.30289e-06	0.50349	0.0726358	1.30289e-06	0.33017	0.289472	1.30289e-06	0.27216	1.30289e-06	1.30289e-06	0.89756	0.875098	1.30289e-06
ZNF101	0.068459	1.30289e-06	1.30289e-06	0.74639	0.0229476	1.30289e-06	0.23928	0.15999	1.30289e-06	-0.19693	1.30289e-06	1.30289e-06	0.31956	1.30289e-06	1.30289e-06	0.25099	0.0732631	1.30289e-06
TRMT61B	-0.062879	1.30289e-06	1.30289e-06	0.17818	0.0228725	1.30289e-06	0.40505	0.00814156	1.30289e-06	-0.04061	1.30289e-06	1.30289e-06	0.15608	1.30289e-06	1.30289e-06	0.407	0.026505	1.30289e-06
PPM1K	0.27658	0.220867	1.30289e-06	0.66856	0.0222279	1.30289e-06	0.10518	1.30289e-06	1.30289e-06	0.33512	0.42798	1.30289e-06	-0.0070591	1.30289e-06	1.30289e-06	0.147	1.30289e-06	1.30289e-06
LUCAT1	0.53111	0.147702	1.30289e-06	0.37066	0.0222279	1.30289e-06	0.083988	1.30289e-06	1.30289e-06	0.20986	1.30289e-06	1.30289e-06	0.24803	0.0194803	1.30289e-06	0.23517	0.0203997	1.30289e-06
ESRRG	0.55113	0.0351146	1.30289e-06	0.28362	0.0222279	1.30289e-06	0.55265	0.188921	1.30289e-06	0.032231	0.28687	1.30289e-06	0.51443	0.0972201	1.30289e-06	0.52508	0.213551	1.30289e-06
CARD10	0.39621	0.019459	1.30289e-06	0.3477	0.0222279	1.30289e-06	0.94005	0.287722	1.30289e-06	-0.49582	1.30289e-06	0.821426	0.581	0.306714	1.30289e-06	0.49641	0.198481	1.30289e-06
PAX9	0.2188	0.00224807	1.30289e-06	0.29873	0.0222279	1.30289e-06	0.51149	0.0652062	1.30289e-06	0.31452	1.30289e-06	1.30289e-06	0.46854	0.296282	1.30289e-06	-0.29594	1.30289e-06	1.30289e-06
MED13L	-0.22969	1.30289e-06	1.30289e-06	-0.23123	0.0222279	1.30289e-06	0.20274	0.0726358	1.30289e-06	0.18524	1.30289e-06	1.30289e-06	-0.35523	1.30289e-06	1.00354	0.12154	1.30289e-06	1.30289e-06
RNU4-90P	0.014099	1.30289e-06	1.30289e-06	0.54756	0.0222279	1.30289e-06	0.24179	0.000956936	1.30289e-06	0.09842	1.30289e-06	1.30289e-06	-0.086943	1.30289e-06	1.30289e-06	-0.33998	1.30289e-06	0.100809
CIB4	-0.19017	1.30289e-06	1.30289e-06	0.28558	0.0222279	1.30289e-06	0.057596	1.30289e-06	1.30289e-06	0.51987	0.374675	1.30289e-06	-0.024298	1.30289e-06	1.30289e-06	0.25446	0.12733	1.30289e-06
JAZF1-AS1	0.37156	1.30289e-06	1.30289e-06	0.38071	0.0222279	1.30289e-06	-0.064529	1.30289e-06	1.30289e-06	0.42369	0.0886602	1.30289e-06	0.26664	1.30289e-06	1.30289e-06	-0.22858	1.30289e-06	1.30289e-06
CALR	0.19004	1.30289e-06	1.30289e-06	0.11257	0.0222279	1.30289e-06	0.16154	1.30289e-06	1.30289e-06	-0.47527	1.30289e-06	0.226466	-0.15398	1.30289e-06	1.30289e-06	0.5854	0.120972	1.30289e-06
RP11-150O12.6	0.19944	1.30289e-06	1.30289e-06	0.2113	0.0217355	1.30289e-06	0.47277	0.170233	1.30289e-06	0.2145	0.00239216	1.30289e-06	0.10498	1.30289e-06	1.30289e-06	0.41443	0.12733	1.30289e-06
LPCAT1	0.4428	0.147702	1.30289e-06	0.51632	0.0212887	1.30289e-06	0.57473	0.0812506	1.30289e-06	0.61163	0.438745	1.30289e-06	0.44018	0.0965698	1.30289e-06	0.29424	0.026505	1.30289e-06
PTPN4	0.27711	0.0303656	1.30289e-06	0.36196	0.0212887	1.30289e-06	0.43383	0.183374	1.30289e-06	0.61864	0.584875	1.30289e-06	0.18866	1.30289e-06	1.30289e-06	0.48289	0.0626542	1.30289e-06
BTN2A1	0.15561	0.0136955	1.30289e-06	0.49547	0.0212887	1.30289e-06	0.29096	1.30289e-06	1.30289e-06	-0.032368	1.30289e-06	1.30289e-06	0.23054	0.00713159	1.30289e-06	0.53239	0.429147	1.30289e-06
RP11-95P2.3	0.3487	0.00370684	1.30289e-06	0.44759	0.0212887	1.30289e-06	0.12216	1.30289e-06	1.30289e-06	-0.14534	1.30289e-06	1.30289e-06	0.7151	0.141926	1.30289e-06	1.0525	0.775863	1.30289e-06
ZMIZ1-AS1	-0.071126	0.00224807	1.30289e-06	0.27902	0.0212887	1.30289e-06	0.28574	0.0726358	1.30289e-06	0.58652	0.436898	1.30289e-06	0.16908	1.30289e-06	1.30289e-06	0.21578	1.30289e-06	1.30289e-06
SCAMP5	0.15025	0.00224807	1.30289e-06	0.23616	0.0212887	1.30289e-06	0.19277	0.00868973	1.30289e-06	0.052972	1.30289e-06	1.30289e-06	0.15992	1.30289e-06	1.30289e-06	-0.072571	1.30289e-06	1.30289e-06
CLK1	-0.053667	1.30289e-06	1.30289e-06	0.68652	0.0212887	1.30289e-06	-0.14028	0.0985253	1.30289e-06	0.35139	0.0399237	1.30289e-06	-0.074913	1.30289e-06	1.30289e-06	0.42433	1.30289e-06	1.30289e-06
ZNF506	-0.54467	1.30289e-06	0.149794	-0.24928	0.0212887	1.30289e-06	-0.25857	0.00967358	1.30289e-06	-0.59289	1.30289e-06	0.152118	-0.29112	1.30289e-06	1.30289e-06	-0.57759	1.30289e-06	1.30289e-06
ZNF283	0.33415	1.30289e-06	1.30289e-06	-0.051236	0.0212887	1.30289e-06	0.52497	0.00213066	1.30289e-06	0.21188	1.30289e-06	1.30289e-06	0.30848	1.30289e-06	1.30289e-06	-0.22104	1.30289e-06	1.30289e-06
NIT2	0.065484	1.30289e-06	1.30289e-06	0.5746	0.0212887	1.30289e-06	0.14431	1.30289e-06	1.30289e-06	0.3084	0.129816	1.30289e-06	-0.19353	1.30289e-06	1.30289e-06	-0.2894	1.30289e-06	0.00574137
MIR548AT	-0.067863	1.30289e-06	1.30289e-06	0.43864	0.0212887	1.30289e-06	-0.19244	1.30289e-06	1.30289e-06	0.44889	0.0842388	1.30289e-06	-0.45463	1.30289e-06	1.30289e-06	-0.30616	1.30289e-06	1.30289e-06
TTC28-AS1	-0.076602	1.30289e-06	1.30289e-06	0.65325	0.0212887	1.30289e-06	0.064621	1.30289e-06	1.30289e-06	-0.077191	1.30289e-06	1.30289e-06	0.65855	0.0393285	1.30289e-06	0.31932	0.026505	1.30289e-06
RAB35	-0.46492	1.30289e-06	0.183694	0.42349	0.0212887	1.30289e-06	-0.19071	1.30289e-06	1.30289e-06	-0.20024	1.30289e-06	1.30289e-06	-0.75887	1.30289e-06	0.556371	-1.5225	1.30289e-06	1.7921
KIAA1683	-0.32851	1.30289e-06	0.142148	0.29985	0.0194744	1.30289e-06	0.19374	1.30289e-06	1.30289e-06	-0.90011	1.30289e-06	0.747028	-0.2706	1.30289e-06	1.30289e-06	-0.21924	1.30289e-06	1.30289e-06
NACC1	-0.31382	1.30289e-06	1.30289e-06	-0.51329	0.0194744	0.0250906	-0.31712	1.30289e-06	1.30289e-06	0.079667	1.30289e-06	1.30289e-06	0.072941	1.30289e-06	1.30289e-06	-0.5089	1.30289e-06	0.382881
MIR4295	0.2956	0.147702	1.30289e-06	0.28448	0.0191684	1.30289e-06	-0.051975	0.181484	1.30289e-06	0.36494	0.280495	1.30289e-06	1.0442	1.3687	1.30289e-06	0.48385	0.026505	1.30289e-06
RP11-81F13.2	0.16868	0.0351146	1.30289e-06	0.32202	0.0191684	1.30289e-06	0.33382	0.027457	1.30289e-06	0.66828	0.482391	1.30289e-06	0.406	0.0782532	1.30289e-06	0.40366	0.213551	1.30289e-06
MACROD1	0.34536	0.0208697	1.30289e-06	0.61483	0.0191684	1.30289e-06	0.078345	1.30289e-06	1.30289e-06	-0.093244	1.30289e-06	1.30289e-06	-0.32318	1.30289e-06	0.123575	0.44794	0.0732631	1.30289e-06
LGR6	0.29843	0.00855152	1.30289e-06	0.54945	0.0191684	1.30289e-06	0.33404	0.181484	1.30289e-06	0.29397	1.30289e-06	1.30289e-06	0.29142	0.05039	1.30289e-06	0.37327	0.026505	1.30289e-06
RFX1	0.17462	1.30289e-06	1.30289e-06	0.24856	0.0191684	1.30289e-06	0.3953	1.30289e-06	1.30289e-06	-0.47284	1.30289e-06	0.165247	0.37338	0.00705257	1.30289e-06	-0.17306	1.30289e-06	1.30289e-06
CCDC130	-1.8133	1.30289e-06	0.775799	-0.74975	0.0191684	0.386362	-1.9511	1.30289e-06	0.469034	-1.2901	1.30289e-06	0.261942	-0.95598	1.30289e-06	0.147958	-0.38834	1.30289e-06	0.010161
PIAS3	-0.1999	1.30289e-06	1.30289e-06	0.15574	0.0191684	1.30289e-06	-0.090524	1.30289e-06	1.30289e-06	-0.30154	1.30289e-06	0.250789	0.14305	1.30289e-06	1.30289e-06	0.13964	1.30289e-06	1.30289e-06
GOT1L1	0.37263	0.0653783	1.30289e-06	0.022648	0.0181963	1.30289e-06	0.11965	1.30289e-06	1.30289e-06	0.47441	1.30289e-06	1.30289e-06	0.46064	0.0194803	1.30289e-06	0.44409	0.277194	1.30289e-06
CPLX1	0.34482	0.0458255	1.30289e-06	0.22063	0.0178776	1.30289e-06	0.26829	0.0102548	1.30289e-06	-0.078541	1.30289e-06	1.30289e-06	0.099585	1.30289e-06	1.30289e-06	0.65254	0.164868	1.30289e-06
PSMD5-AS1	-0.0026369	1.30289e-06	1.30289e-06	0.24714	0.0178423	1.30289e-06	0.44364	0.147048	1.30289e-06	0.078774	1.30289e-06	1.30289e-06	-0.069522	1.30289e-06	1.30289e-06	0.079614	1.30289e-06	1.30289e-06
ABHD8	-0.51748	0.00855152	0.0911784	0.55442	0.0177446	1.30289e-06	-0.46693	1.30289e-06	0.0648894	-0.13054	1.30289e-06	1.30289e-06	-0.074166	1.30289e-06	1.30289e-06	0.11742	0.026505	1.30289e-06
TAP2	0.0054445	1.30289e-06	1.30289e-06	0.22003	0.0177446	1.30289e-06	0.10775	1.30289e-06	1.30289e-06	-0.17063	1.30289e-06	1.30289e-06	0.13259	0.00705257	1.30289e-06	0.54463	0.0897054	1.30289e-06
STK38L	0.21444	1.30289e-06	1.30289e-06	0.48724	0.0177446	1.30289e-06	0.34904	1.30289e-06	1.30289e-06	-0.46068	1.30289e-06	1.30289e-06	0.68531	0.19962	1.30289e-06	0.35274	0.026505	1.30289e-06
AC004012.1	0.23868	1.30289e-06	1.30289e-06	-0.07145	0.0177446	1.30289e-06	0.10093	1.30289e-06	1.30289e-06	0.29241	1.30289e-06	1.30289e-06	0.14627	1.30289e-06	1.30289e-06	0.37248	0.026505	1.30289e-06
RP11-848P1.2	-0.091188	1.30289e-06	1.30289e-06	0.21768	0.0177446	1.30289e-06	0.18934	1.30289e-06	1.30289e-06	0.22721	1.30289e-06	1.30289e-06	-0.31206	1.30289e-06	0.262344	-0.64662	1.30289e-06	0.27786
RP11-263K19.4	0.36551	0.131376	1.30289e-06	0.37055	0.0169879	1.30289e-06	0.41128	0.181484	1.30289e-06	-0.15947	0.231887	1.30289e-06	0.58913	0.202558	1.30289e-06	0.42411	0.164868	1.30289e-06
APOBEC3F	0.44202	0.0582442	1.30289e-06	0.59821	0.0169879	1.30289e-06	0.30724	0.0301966	1.30289e-06	-0.69008	1.30289e-06	0.545559	0.48474	0.000675854	1.30289e-06	0.2958	1.30289e-06	1.30289e-06
ZNF75A	0.028407	0.00855152	1.30289e-06	0.30601	0.0169879	1.30289e-06	0.025976	1.30289e-06	1.30289e-06	-0.93593	1.30289e-06	0.45419	-0.18733	1.30289e-06	1.30289e-06	-0.015831	1.30289e-06	1.30289e-06
ANKLE1	0.52028	0.00810129	1.30289e-06	0.22921	0.0169879	1.30289e-06	-0.039986	1.30289e-06	1.30289e-06	-0.12695	1.30289e-06	1.30289e-06	0.15929	1.30289e-06	1.30289e-06	-0.026015	1.30289e-06	1.30289e-06
IRX3	-0.3063	0.00224807	1.30289e-06	0.26444	0.0169879	1.30289e-06	-0.002788	1.30289e-06	1.30289e-06	0.29918	0.0599335	1.30289e-06	0.3522	0.0442863	1.30289e-06	0.28675	0.143507	1.30289e-06
INSL3	0.24092	1.30289e-06	1.30289e-06	0.26571	0.0169879	1.30289e-06	0.55966	0.131909	1.30289e-06	0.14544	1.30289e-06	1.30289e-06	0.16536	1.30289e-06	1.30289e-06	0.37838	0.0732631	1.30289e-06
TUBAL3	0.18522	1.30289e-06	1.30289e-06	0.30317	0.0169879	1.30289e-06	0.20307	0.000328016	1.30289e-06	0.7784	0.584875	1.30289e-06	0.68146	0.21602	1.30289e-06	0.61484	0.026505	1.30289e-06
ARCN1	-0.03819	1.30289e-06	0.136102	-1.6226	0.0169879	0.432636	-1.4543	1.30289e-06	0.824711	-2.2167	1.30289e-06	1.26354	-1.1914	1.30289e-06	0.870616	-0.5925	1.30289e-06	0.251307
UQCRH	-0.85601	1.30289e-06	0.638125	-0.98647	0.0169879	0.408306	-0.99316	1.30289e-06	0.679827	-1.3053	1.30289e-06	1.58816	-0.35404	1.30289e-06	0.271654	-0.37585	1.30289e-06	1.30289e-06
MAP1LC3B	-0.32541	1.30289e-06	0.331381	0.45278	0.0169879	1.30289e-06	0.01241	1.30289e-06	1.30289e-06	0.027714	1.30289e-06	1.30289e-06	-0.095794	1.30289e-06	1.30289e-06	0.0061124	1.30289e-06	1.30289e-06
ADGRD2	0.18176	0.220867	1.30289e-06	0.40813	0.0163137	1.30289e-06	0.49187	0.183374	1.30289e-06	0.17345	1.30289e-06	1.30289e-06	0.081766	0.05039	1.30289e-06	0.57939	0.026505	1.30289e-06
PPP1R9A	0.31208	0.00855152	1.30289e-06	0.47014	0.0163137	1.30289e-06	0.021578	0.0812506	1.30289e-06	0.37314	0.173956	1.30289e-06	0.26247	1.30289e-06	1.30289e-06	0.5157	0.0852687	1.30289e-06
PIDD1	0.13885	1.30289e-06	1.30289e-06	0.24465	0.0163137	1.30289e-06	0.37227	0.16153	1.30289e-06	-0.15722	1.30289e-06	1.30289e-06	0.26142	1.30289e-06	1.30289e-06	0.54049	0.0494589	1.30289e-06
GOSR1	-0.099629	1.30289e-06	1.30289e-06	0.41287	0.0163137	1.30289e-06	0.068805	1.30289e-06	1.30289e-06	0.4907	0.0409324	1.30289e-06	-0.062026	1.30289e-06	1.30289e-06	0.38974	0.00563313	1.30289e-06
CBX2	0.032139	1.30289e-06	1.30289e-06	0.24641	0.0163137	1.30289e-06	0.30821	1.30289e-06	1.30289e-06	0.37981	0.0256435	1.30289e-06	0.14312	1.30289e-06	1.30289e-06	-0.23225	1.30289e-06	1.30289e-06
ATE1	0.45336	1.30289e-06	1.30289e-06	0.27657	0.0163137	1.30289e-06	-0.2173	1.30289e-06	1.30289e-06	0.2142	1.30289e-06	1.30289e-06	0.0098607	1.30289e-06	1.30289e-06	0.10952	1.30289e-06	1.30289e-06
TMEM244	0.69122	0.147702	1.30289e-06	0.54546	0.0158288	1.30289e-06	0.31675	0.0115057	1.30289e-06	0.14737	1.30289e-06	1.30289e-06	0.14854	0.12716	1.30289e-06	-0.084309	1.30289e-06	1.30289e-06
RP11-414H23.2	0.39457	0.0449697	1.30289e-06	-0.16109	0.0158288	1.30289e-06	-0.10094	1.30289e-06	1.30289e-06	0.25119	1.30289e-06	1.30289e-06	0.067251	1.30289e-06	1.30289e-06	0.098905	1.30289e-06	1.30289e-06
KB-1930G5.4	0.39345	0.0351146	1.30289e-06	0.34804	0.0158288	1.30289e-06	0.72969	0.136145	1.30289e-06	0.44373	0.352782	1.30289e-06	0.55373	0.168661	1.30289e-06	0.5424	0.449057	1.30289e-06
AP001362.1	0.52642	0.0267534	1.30289e-06	0.22569	0.0158288	1.30289e-06	0.12911	1.30289e-06	1.30289e-06	0.066859	1.30289e-06	1.30289e-06	0.011115	0.05039	1.30289e-06	0.46917	0.026505	1.30289e-06
RP11-73O6.3	-0.012974	0.0208697	1.30289e-06	0.46966	0.0158288	1.30289e-06	0.40858	0.0978083	1.30289e-06	0.26476	0.494083	1.30289e-06	0.53417	0.167561	1.30289e-06	-0.17799	0.026505	1.30289e-06
CST6	0.26582	0.0204721	1.30289e-06	0.37088	0.0158288	1.30289e-06	0.18433	1.30289e-06	1.30289e-06	-0.05671	1.30289e-06	1.30289e-06	0.092347	0.0682168	1.30289e-06	0.33076	0.026505	1.30289e-06
DFNA5	0.4727	0.00855152	1.30289e-06	0.26126	0.0158288	1.30289e-06	-0.31152	1.30289e-06	1.30289e-06	0.48571	0.318562	1.30289e-06	0.11171	1.30289e-06	1.30289e-06	0.022722	1.30289e-06	1.30289e-06
CDHR5	0.28991	0.00855152	1.30289e-06	0.17168	0.0158288	1.30289e-06	0.13375	1.30289e-06	1.30289e-06	-0.22095	1.30289e-06	1.30289e-06	0.12895	1.30289e-06	1.30289e-06	0.24557	0.026505	1.30289e-06
COL8A1	0.14986	1.30289e-06	1.30289e-06	0.67212	0.0158288	1.30289e-06	0.56395	0.181484	1.30289e-06	0.24075	0.041097	1.30289e-06	0.098291	1.30289e-06	1.30289e-06	-0.16147	1.30289e-06	1.30289e-06
AP4B1	0.020975	1.30289e-06	1.30289e-06	0.28668	0.0158288	1.30289e-06	0.25796	0.181484	1.30289e-06	-0.12669	1.30289e-06	1.30289e-06	0.15625	1.30289e-06	1.30289e-06	0.078773	1.30289e-06	1.30289e-06
AC005253.4	0.071855	1.30289e-06	1.30289e-06	0.31741	0.0158288	1.30289e-06	0.71787	0.138133	1.30289e-06	-0.022422	0.0992523	1.30289e-06	0.4526	0.00713159	1.30289e-06	0.15458	1.30289e-06	1.30289e-06
PKP1	0.11666	1.30289e-06	1.30289e-06	0.26675	0.0158288	1.30289e-06	0.17257	0.0726358	1.30289e-06	0.35591	1.30289e-06	1.30289e-06	0.43219	0.109398	1.30289e-06	0.32064	0.0494589	1.30289e-06
CTD-2278I10.4	-0.12432	1.30289e-06	1.30289e-06	0.30032	0.0158288	1.30289e-06	0.13561	0.0634546	1.30289e-06	-0.20831	1.30289e-06	0.210961	0.1381	1.30289e-06	1.30289e-06	0.2794	0.026505	1.30289e-06
AZI2	0.32238	1.30289e-06	1.30289e-06	0.15653	0.0158288	1.30289e-06	0.53572	0.0342552	1.30289e-06	0.24929	1.30289e-06	1.30289e-06	0.8495	0.085797	1.30289e-06	0.40166	0.026505	1.30289e-06
HOOK2	0.32964	1.30289e-06	1.30289e-06	0.4871	0.0158288	1.30289e-06	0.37695	0.027457	1.30289e-06	-0.25833	1.30289e-06	1.30289e-06	0.22914	0.00713159	1.30289e-06	0.44564	0.0494589	1.30289e-06
SREBF2	-1.4371	1.30289e-06	1.42857	0.24264	0.0158288	1.30289e-06	-1.0653	1.30289e-06	1.52862	0.20661	0.00769175	1.30289e-06	0.68679	0.689175	1.30289e-06	0.51022	0.429147	1.30289e-06
CCDC40	-0.29566	1.30289e-06	0.23985	0.23676	0.0158288	1.30289e-06	-0.12113	1.30289e-06	1.30289e-06	0.24528	0.00470623	1.30289e-06	0.12906	1.30289e-06	1.30289e-06	0.10964	1.30289e-06	1.30289e-06
HIST1H2BD	-0.55285	1.30289e-06	0.331242	-0.3294	0.0158288	0.380037	-0.92935	1.30289e-06	0.725346	-0.84656	1.30289e-06	1.01024	-0.22168	1.30289e-06	0.116513	0.15788	0.0203997	1.30289e-06
PSMC3IP	-0.25459	1.30289e-06	1.30289e-06	0.34831	0.0158288	1.30289e-06	-0.54372	1.30289e-06	0.188073	0.23175	1.30289e-06	1.30289e-06	-0.38635	0.202558	0.295589	0.074654	1.30289e-06	1.30289e-06
CDC40	-1.2072	1.30289e-06	0.920352	-0.51501	0.0158288	0.243367	-1.9336	1.30289e-06	1.16754	-2.1602	1.30289e-06	0.301485	-1.4959	1.30289e-06	1.17024	-1.5195	1.30289e-06	0.460812
RNA5SP276	0.12044	1.30289e-06	1.30289e-06	0.46048	0.0158288	1.30289e-06	0.23037	1.30289e-06	1.30289e-06	0.037665	1.30289e-06	1.30289e-06	0.06039	1.30289e-06	1.30289e-06	-0.19247	1.30289e-06	1.30289e-06
RN7SL445P	0.74287	0.220867	1.30289e-06	0.42459	0.0153548	1.30289e-06	0.39305	0.0726358	1.30289e-06	0.40943	0.112326	0.110581	0.12561	1.30289e-06	1.30289e-06	-0.43749	0.0494589	1.30289e-06
APOBEC3D	0.50701	0.147702	1.30289e-06	0.22475	0.0153548	1.30289e-06	0.49019	0.126716	1.30289e-06	-0.22857	1.30289e-06	0.100338	0.5062	0.366968	1.30289e-06	0.41765	0.026505	1.30289e-06
ETNK2	0.40986	0.0585825	1.30289e-06	0.079178	0.0153548	1.30289e-06	0.44662	0.0949098	1.30289e-06	0.35934	0.0977158	1.30289e-06	0.24188	0.118833	1.30289e-06	0.20097	1.30289e-06	1.30289e-06
HLA-A	0.42313	0.0406247	1.30289e-06	0.26666	0.0153548	1.30289e-06	0.43184	0.0401895	1.30289e-06	0.14871	1.30289e-06	1.30289e-06	0.53274	0.19962	1.30289e-06	0.34767	0.164868	1.30289e-06
LINC-PINT	0.020317	0.0351146	1.30289e-06	0.44575	0.0153548	1.30289e-06	0.10421	1.30289e-06	1.30289e-06	0.47466	0.192234	1.30289e-06	0.0565	1.30289e-06	1.30289e-06	0.067083	0.00645444	1.30289e-06
RN7SL383P	0.2747	0.0351146	1.30289e-06	0.19143	0.0153548	1.30289e-06	0.20796	1.30289e-06	1.30289e-06	0.0058007	1.30289e-06	1.30289e-06	0.50671	0.0682168	1.30289e-06	0.023075	1.30289e-06	1.30289e-06
KLHL38	0.020823	1.30289e-06	1.30289e-06	0.017043	0.0153548	1.30289e-06	0.094845	0.0812506	1.30289e-06	0.45748	0.240813	1.30289e-06	-0.12879	1.30289e-06	1.30289e-06	-0.21365	0.0613077	1.30289e-06
C1orf127	0.27004	1.30289e-06	1.30289e-06	0.24051	0.0153548	1.30289e-06	0.30724	0.0566777	1.30289e-06	0.34246	1.30289e-06	1.30289e-06	0.39346	1.30289e-06	1.30289e-06	0.64679	0.429147	1.30289e-06
GATA3	0.37346	1.30289e-06	1.30289e-06	0.20428	0.0153548	1.30289e-06	0.12446	0.00814156	1.30289e-06	0.53153	0.298886	1.30289e-06	0.1125	1.30289e-06	1.30289e-06	0.059341	1.30289e-06	1.30289e-06
CES1	0.11449	1.30289e-06	1.30289e-06	0.37582	0.0150346	1.30289e-06	0.18633	1.30289e-06	1.30289e-06	0.30425	0.0873933	1.30289e-06	0.27976	0.0168452	1.30289e-06	0.38727	0.0946516	1.30289e-06
HRK	0.086985	1.30289e-06	1.30289e-06	-0.758	0.0145129	1.30289e-06	0.31056	1.30289e-06	1.30289e-06	0.065946	0.28687	1.30289e-06	-0.59235	1.30289e-06	0.0153705	0.14082	1.30289e-06	1.30289e-06
SGCE	-0.057547	0.147702	1.30289e-06	0.45034	0.0140331	1.30289e-06	0.33294	0.0812506	1.30289e-06	0.097669	1.30289e-06	1.30289e-06	-0.2895	0.118833	1.30289e-06	0.48157	0.0732631	1.30289e-06
SLC25A12	0.32682	0.0208697	1.30289e-06	0.020441	0.0140331	1.30289e-06	0.05927	0.0232663	1.30289e-06	0.47416	0.147502	1.30289e-06	0.076927	1.30289e-06	1.30289e-06	-0.21826	1.30289e-06	1.30289e-06
CR536603.1	0.31368	0.0208697	1.30289e-06	0.49004	0.0140331	1.30289e-06	0.052739	1.30289e-06	1.30289e-06	-0.19292	1.30289e-06	1.30289e-06	0.70421	0.0918411	1.30289e-06	0.35867	0.026505	1.30289e-06
C9orf3	0.12879	0.00224807	1.30289e-06	0.2415	0.0140331	1.30289e-06	0.31444	0.0652062	1.30289e-06	0.11224	0.0675836	1.30289e-06	0.23925	0.0272364	1.30289e-06	0.1644	1.30289e-06	1.30289e-06
RP5-1042K10.13	0.051964	1.30289e-06	1.30289e-06	0.58636	0.0140331	1.30289e-06	0.91424	0.359988	1.30289e-06	-0.32656	1.30289e-06	0.202047	0.90353	0.660944	1.30289e-06	0.26839	0.026505	1.30289e-06
ADAMTS15	0.39201	1.30289e-06	1.30289e-06	0.66381	0.0140331	1.30289e-06	0.06939	0.0892225	1.30289e-06	0.2536	0.0570212	1.30289e-06	0.029043	1.30289e-06	1.30289e-06	0.67431	0.429147	1.30289e-06
RP11-57H14.3	0.039208	1.30289e-06	0.516336	-0.11076	0.0140331	0.479545	0.20386	1.30289e-06	0.519367	-0.055363	0.0636295	0.468726	-0.68115	0.00705257	0.658684	-0.8971	1.30289e-06	0.517425
CENPO	-0.17555	1.30289e-06	1.30289e-06	0.22297	0.0140331	1.30289e-06	-0.48798	1.30289e-06	0.318866	0.0466	1.30289e-06	1.30289e-06	-0.56121	1.30289e-06	0.41652	-0.576	1.30289e-06	0.197855
RFXANK	-0.076623	1.30289e-06	1.30289e-06	0.16991	0.0140331	1.30289e-06	-0.092065	1.30289e-06	1.30289e-06	-0.58634	1.30289e-06	0.718006	-0.054342	1.30289e-06	1.30289e-06	0.15458	1.30289e-06	1.30289e-06
SHISA8	0.20115	0.00224807	1.30289e-06	0.56324	0.0139134	1.30289e-06	0.1223	1.30289e-06	1.30289e-06	-0.28594	1.30289e-06	0.218204	0.49696	0.0442863	1.30289e-06	0.33283	0.0389754	1.30289e-06
ZKSCAN8	0.44181	0.22469	1.30289e-06	0.25191	0.0134146	1.30289e-06	0.45865	0.270527	1.30289e-06	0.51822	0.244784	1.30289e-06	0.32733	1.30289e-06	1.30289e-06	0.87507	1.09584	1.30289e-06
UBD	0.54401	0.0653783	1.30289e-06	0.25121	0.0134146	1.30289e-06	0.23333	0.0401895	1.30289e-06	0.53306	0.0277643	1.30289e-06	-0.079223	0.0194803	1.30289e-06	0.35414	0.164868	1.30289e-06
ANXA13	0.3615	0.0424071	1.30289e-06	0.22703	0.0134146	1.30289e-06	0.28249	1.30289e-06	1.30289e-06	0.1833	1.30289e-06	1.30289e-06	0.22465	0.21602	1.30289e-06	-0.18784	1.30289e-06	1.30289e-06
TLK1	0.39628	0.00855152	1.30289e-06	0.10397	0.0134146	1.30289e-06	-0.068568	1.30289e-06	1.30289e-06	0.58866	0.397627	1.30289e-06	0.24662	1.30289e-06	1.30289e-06	-0.31367	1.30289e-06	1.30289e-06
KYAT3	0.28933	0.00335876	1.30289e-06	0.2771	0.0134146	1.30289e-06	0.34875	0.0905986	1.30289e-06	0.68784	0.294556	1.30289e-06	0.36095	0.00133359	1.30289e-06	-0.088102	1.30289e-06	1.30289e-06
HEPACAM2	0.034408	1.30289e-06	1.30289e-06	0.13371	0.0134146	1.30289e-06	0.62534	0.250855	1.30289e-06	0.15007	0.00769175	1.30289e-06	0.53854	0.167817	1.30289e-06	0.60055	0.429147	1.30289e-06
MKRN1	0.29078	1.30289e-06	1.30289e-06	0.24112	0.0134146	1.30289e-06	0.67688	0.181484	1.30289e-06	0.25657	0.00470623	1.30289e-06	0.81319	0.306714	1.30289e-06	0.62116	0.327585	1.30289e-06
OPTC	-0.20443	1.30289e-06	1.30289e-06	0.21588	0.0134146	1.30289e-06	0.43993	0.170481	1.30289e-06	0.085311	1.30289e-06	1.30289e-06	0.099048	1.30289e-06	1.30289e-06	0.41526	0.0389754	1.30289e-06
RPS6KA5	-0.11896	1.30289e-06	1.30289e-06	0.38724	0.0134146	1.30289e-06	0.37944	0.131627	1.30289e-06	0.055131	1.30289e-06	1.30289e-06	0.4802	0.0369	1.30289e-06	0.089168	1.30289e-06	1.30289e-06
AMFR	-0.0097534	1.30289e-06	1.30289e-06	0.23733	0.0134146	1.30289e-06	0.42715	0.0978083	1.30289e-06	0.33394	0.115989	1.30289e-06	0.010937	0.00831771	1.30289e-06	0.01681	1.30289e-06	1.30289e-06
RP11-553A10.1	0.25749	1.30289e-06	1.30289e-06	0.438	0.0134146	1.30289e-06	0.34798	0.0726358	1.30289e-06	0.52722	0.390528	1.30289e-06	0.35596	0.05039	1.30289e-06	0.070469	1.30289e-06	1.30289e-06
ERAP1	0.088031	1.30289e-06	1.30289e-06	0.15782	0.0134146	1.30289e-06	0.53554	0.0611732	1.30289e-06	0.11912	1.30289e-06	1.30289e-06	0.39291	1.30289e-06	1.30289e-06	0.462	0.143507	1.30289e-06
AC008940.1	-0.034248	1.30289e-06	1.30289e-06	0.46292	0.0134146	1.30289e-06	0.10622	1.30289e-06	1.30289e-06	0.21801	0.0341565	1.30289e-06	0.23376	1.30289e-06	1.30289e-06	0.29096	0.0203997	1.30289e-06
BZW1	-0.078887	1.30289e-06	1.30289e-06	0.21473	0.0134146	1.30289e-06	0.063411	1.30289e-06	1.30289e-06	0.096376	1.30289e-06	1.30289e-06	-0.043753	1.30289e-06	1.30289e-06	0.64469	0.143507	1.30289e-06
NEBL	0.2635	1.30289e-06	1.30289e-06	0.017872	0.0134146	1.30289e-06	0.42837	1.30289e-06	1.30289e-06	0.016735	1.30289e-06	1.30289e-06	0.51545	0.0194803	1.30289e-06	-0.024237	1.30289e-06	1.30289e-06
RP11-432I5.1	-0.18398	1.30289e-06	1.30289e-06	0.63053	0.0134146	1.30289e-06	-0.055323	1.30289e-06	0.474318	0.060544	1.30289e-06	0.45419	0.31661	1.30289e-06	1.30289e-06	-0.077523	1.30289e-06	1.30289e-06
RAMP2-AS1	0.43344	0.0351146	1.30289e-06	0.16568	0.0126198	1.30289e-06	0.49031	0.00814156	1.30289e-06	0.32838	0.318562	1.30289e-06	0.4863	0.00705257	1.30289e-06	0.12074	1.30289e-06	1.30289e-06
SIVA1	0.10365	1.30289e-06	1.30289e-06	0.22131	0.0126198	1.30289e-06	0.024825	1.30289e-06	1.30289e-06	-0.427	1.30289e-06	1.42053	0.15116	1.30289e-06	1.30289e-06	0.3566	0.0904236	1.30289e-06
AC097724.3	-0.13129	1.30289e-06	1.30289e-06	0.52331	0.00951685	1.30289e-06	0.34067	1.30289e-06	1.30289e-06	0.071072	1.30289e-06	1.30289e-06	-0.1665	1.30289e-06	1.30289e-06	0.32778	0.0531932	1.30289e-06
MAP1LC3B2	0.00081612	1.30289e-06	1.30289e-06	0.53789	0.00841999	1.30289e-06	-0.14941	1.30289e-06	1.30289e-06	-0.22046	1.30289e-06	1.30289e-06	0.33709	1.30289e-06	1.30289e-06	-0.059337	1.30289e-06	1.30289e-06
PTHLH	0.3024	0.00417314	1.30289e-06	0.5396	0.00840847	1.30289e-06	-0.057846	1.30289e-06	1.30289e-06	0.58557	0.318562	1.30289e-06	-0.12019	1.30289e-06	1.30289e-06	0.085209	0.026505	1.30289e-06
RP11-218M22.1	0.47391	0.392086	1.30289e-06	0.39202	0.00788321	1.30289e-06	0.18051	1.30289e-06	1.30289e-06	0.30996	0.0873933	1.30289e-06	0.29379	0.00705257	1.30289e-06	0.46065	0.280295	1.30289e-06
RP11-116N8.2	0.35612	0.22469	1.30289e-06	0.38745	0.00788321	1.30289e-06	0.35512	0.181484	1.30289e-06	0.69503	0.405581	1.30289e-06	0.16768	1.30289e-06	1.30289e-06	0.32239	0.026505	1.30289e-06
RP11-445P17.8	0.29744	0.160989	1.30289e-06	0.2596	0.00788321	1.30289e-06	0.56032	0.181484	1.30289e-06	0.52862	0.261415	1.30289e-06	0.38421	0.141281	1.30289e-06	-0.040953	1.30289e-06	1.30289e-06
KDELC2	0.12675	0.0351146	1.30289e-06	0.3106	0.00788321	1.30289e-06	-0.13044	1.30289e-06	1.30289e-06	0.17199	1.30289e-06	1.30289e-06	-0.029561	1.30289e-06	1.30289e-06	0.048154	1.30289e-06	1.30289e-06
MIR1909	0.67744	0.0351146	1.30289e-06	-0.00051309	0.00788321	1.30289e-06	-0.24031	1.30289e-06	1.30289e-06	-0.57329	1.30289e-06	0.249894	0.052134	1.30289e-06	1.30289e-06	0.26255	1.30289e-06	1.30289e-06
NDUFB1	0.36217	0.0208697	1.30289e-06	0.51865	0.00788321	1.30289e-06	-0.20896	1.30289e-06	1.30289e-06	0.33182	1.30289e-06	1.30289e-06	0.14042	1.30289e-06	1.30289e-06	0.061515	1.30289e-06	1.30289e-06
RP11-357N13.2	0.2158	0.00810129	1.30289e-06	0.21781	0.00788321	1.30289e-06	-0.046912	1.30289e-06	1.30289e-06	0.32484	0.397627	1.30289e-06	0.2424	1.30289e-06	1.30289e-06	0.19508	0.026505	1.30289e-06
RP11-467J12.4	0.17284	0.00370684	1.30289e-06	0.1803	0.00788321	1.30289e-06	0.48055	0.183374	1.30289e-06	0.67744	0.535101	1.30289e-06	0.5454	0.0682168	1.30289e-06	0.26237	0.213551	1.30289e-06
ERAP2	0.19085	0.00370684	1.30289e-06	0.13189	0.00788321	1.30289e-06	0.44689	0.0652062	1.30289e-06	0.14691	1.30289e-06	1.30289e-06	0.025243	1.30289e-06	1.30289e-06	0.20971	1.30289e-06	1.30289e-06
RP5-1139B12.4	0.16004	0.00370684	1.30289e-06	0.19129	0.00788321	1.30289e-06	0.024557	1.30289e-06	1.30289e-06	0.52439	1.30289e-06	1.30289e-06	0.40658	0.0194803	1.30289e-06	0.30994	1.30289e-06	1.30289e-06
TPP2	0.14425	0.00224807	1.30289e-06	0.32261	0.00788321	1.30289e-06	0.50157	0.181484	1.30289e-06	0.514	0.405581	1.30289e-06	-0.20265	1.30289e-06	1.30289e-06	-0.024423	1.30289e-06	1.30289e-06
SYNPR	0.15047	1.30289e-06	1.30289e-06	0.23805	0.00788321	1.30289e-06	0.57132	0.336547	1.30289e-06	0.69942	0.17219	1.30289e-06	0.88162	0.306714	1.30289e-06	0.44452	0.213551	1.30289e-06
RP11-357N13.1	0.033387	1.30289e-06	1.30289e-06	0.4496	0.00788321	1.30289e-06	0.45332	0.183374	1.30289e-06	0.99639	0.393293	1.30289e-06	0.17199	0.0194803	1.30289e-06	0.38013	0.126274	1.30289e-06
FBXO8	0.22856	1.30289e-06	1.30289e-06	0.27187	0.00788321	1.30289e-06	0.42931	0.170481	1.30289e-06	0.59262	0.280495	1.30289e-06	-0.076333	1.30289e-06	1.30289e-06	0.17961	0.026505	1.30289e-06
MEP1B	0.22148	1.30289e-06	1.30289e-06	0.20601	0.00788321	1.30289e-06	0.45772	0.0623247	1.30289e-06	0.69364	0.371585	1.30289e-06	0.073372	0.00705257	1.30289e-06	0.2562	1.30289e-06	1.30289e-06
ARHGAP27	-0.20375	1.30289e-06	0.72978	0.13802	0.00788321	1.30289e-06	-0.32677	0.030414	1.30289e-06	-0.058246	1.30289e-06	1.30289e-06	-0.1078	1.30289e-06	1.30289e-06	-0.10125	1.30289e-06	1.30289e-06
AL359693.1	0.32171	1.30289e-06	1.30289e-06	0.2387	0.00788321	1.30289e-06	0.057126	1.30289e-06	1.30289e-06	0.24168	0.280495	1.30289e-06	0.17323	1.30289e-06	1.30289e-06	-0.095506	1.30289e-06	1.30289e-06
ZNF155	-0.43956	1.30289e-06	0.385657	0.51352	0.00788321	1.30289e-06	0.13414	1.30289e-06	1.30289e-06	0.30871	0.0502842	1.30289e-06	0.12175	1.30289e-06	1.30289e-06	0.00084914	1.30289e-06	1.30289e-06
ZNF90	-0.13745	1.30289e-06	0.12601	0.15235	0.00788321	1.30289e-06	-0.10053	1.30289e-06	1.30289e-06	0.1009	1.30289e-06	1.30289e-06	-0.32202	1.30289e-06	0.133817	0.36269	0.026505	1.30289e-06
CTD-2089N3.3	0.0934	1.30289e-06	1.30289e-06	0.22283	0.00788321	1.30289e-06	0.17135	1.30289e-06	1.30289e-06	-0.1009	1.30289e-06	1.30289e-06	0.54634	0.0718972	1.30289e-06	0.29077	1.30289e-06	1.30289e-06
GCDH	-0.36049	1.30289e-06	1.30289e-06	0.22277	0.00788321	1.30289e-06	0.091819	1.30289e-06	1.30289e-06	-0.20241	1.30289e-06	1.30289e-06	0.39054	1.30289e-06	1.30289e-06	0.077358	1.30289e-06	1.30289e-06
CYP51A1-AS1	0.098007	1.30289e-06	1.30289e-06	0.14589	0.00788321	1.30289e-06	0.14663	1.30289e-06	1.30289e-06	-0.036436	1.30289e-06	1.30289e-06	0.0012992	1.30289e-06	1.30289e-06	0.073079	1.30289e-06	1.30289e-06
INHBB	-0.0076179	1.30289e-06	1.30289e-06	0.35876	0.00707729	1.30289e-06	-0.1054	0.000732403	1.30289e-06	0.42583	0.28687	1.30289e-06	0.090622	1.30289e-06	1.30289e-06	0.1086	1.30289e-06	1.30289e-06
RP11-315I20.1	0.052056	1.30289e-06	1.30289e-06	0.23582	0.00707729	1.30289e-06	-0.10924	1.30289e-06	1.30289e-06	-0.26719	1.30289e-06	1.30289e-06	-0.50465	1.30289e-06	1.30289e-06	0.12196	1.30289e-06	1.30289e-06
CASZ1	0.083603	1.30289e-06	1.30289e-06	0.43216	0.00637554	1.30289e-06	0.097275	1.30289e-06	1.30289e-06	-0.12109	1.30289e-06	0.169943	-0.17348	1.30289e-06	1.30289e-06	1.0288	1.34106	1.30289e-06
RP11-116G8.5	0.039596	1.30289e-06	1.30289e-06	0.52986	0.00637554	1.30289e-06	0.24198	1.30289e-06	1.30289e-06	0.050015	1.30289e-06	1.30289e-06	0.18373	1.30289e-06	1.30289e-06	0.55788	0.164868	1.30289e-06
RCCD1	0.0022658	1.30289e-06	1.30289e-06	0.33564	0.00637554	1.30289e-06	0.2054	1.30289e-06	1.30289e-06	0.016504	1.30289e-06	1.30289e-06	0.36665	0.0682168	1.30289e-06	0.34726	0.145356	1.30289e-06
C14orf79	0.29441	1.30289e-06	1.30289e-06	0.3038	0.00637554	1.30289e-06	0.35716	1.30289e-06	1.30289e-06	0.1337	1.30289e-06	1.30289e-06	-0.044466	1.30289e-06	1.30289e-06	0.26131	0.025288	1.30289e-06
CSDE1	-0.60899	1.30289e-06	0.876799	0.3647	0.00637554	1.30289e-06	-1.0021	1.30289e-06	1.85805	-1.2068	1.30289e-06	1.78267	-0.39735	1.30289e-06	1.0531	-1.0923	1.30289e-06	1.7716
ADAM15	-0.23459	1.30289e-06	0.0174384	-0.73127	0.00637554	0.0785268	0.0097476	1.30289e-06	1.30289e-06	-0.026249	1.30289e-06	1.30289e-06	-0.10464	1.30289e-06	1.30289e-06	0.092695	1.30289e-06	1.30289e-06
MIR3148	0.3537	0.0653783	1.30289e-06	0.41959	0.00548972	1.30289e-06	0.27073	9.2949e-05	1.30289e-06	0.48628	0.362337	1.30289e-06	0.14	1.30289e-06	1.30289e-06	0.11071	0.116057	1.30289e-06
ADAMTS9	0.316	0.051324	1.30289e-06	0.11492	0.00475409	1.30289e-06	0.33787	1.30289e-06	1.30289e-06	0.41339	0.323835	1.30289e-06	0.64363	0.358374	1.30289e-06	0.46001	0.35432	1.30289e-06
TNS1	0.36106	0.0267534	1.30289e-06	0.043104	0.00475409	1.30289e-06	0.18401	1.30289e-06	1.30289e-06	0.42675	0.098351	1.30289e-06	-0.0034463	0.00705257	1.30289e-06	0.59166	0.0732631	1.30289e-06
LINC00692	0.25371	1.30289e-06	1.30289e-06	0.31582	0.00475409	1.30289e-06	0.52891	0.00868973	1.30289e-06	0.11414	1.30289e-06	1.30289e-06	0.31844	0.149805	1.30289e-06	0.1058	0.026505	1.30289e-06
CXXC4	-0.12942	1.30289e-06	1.30289e-06	-0.5161	0.00430734	0.133937	0.31111	0.0623247	1.30289e-06	-0.0035649	0.0371304	1.30289e-06	0.31484	0.196231	1.30289e-06	0.18431	0.026505	1.30289e-06
CTC-350I8.1	-0.056323	1.30289e-06	1.30289e-06	0.13544	0.00430734	1.30289e-06	0.37977	1.30289e-06	1.30289e-06	0.19989	1.30289e-06	1.30289e-06	-0.017801	1.30289e-06	1.30289e-06	-0.05548	1.30289e-06	1.30289e-06
AC005088.1	-3.0707	1.30289e-06	2.23374	-0.66145	0.00386237	0.34927	-5.2912	1.30289e-06	2.31185	-5.2637	1.30289e-06	2.16679	-3.5568	1.30289e-06	1.91375	-2.9863	1.30289e-06	2.00833
LMX1B	-0.19438	1.30289e-06	1.30289e-06	0.11552	0.00318942	1.30289e-06	0.61986	0.0385931	1.30289e-06	0.081572	1.30289e-06	1.30289e-06	0.29491	1.30289e-06	1.30289e-06	0.022438	1.30289e-06	1.30289e-06
MAST3	0.18958	0.00855152	1.30289e-06	0.23962	0.00316973	1.30289e-06	0.21252	0.183374	1.30289e-06	-0.35397	1.30289e-06	0.25727	0.079945	0.00705257	1.30289e-06	0.070066	1.30289e-06	1.30289e-06
CTD-2192J16.24	0.24514	1.30289e-06	1.30289e-06	0.41428	0.00316973	1.30289e-06	0.42665	0.126716	1.30289e-06	0.041251	1.30289e-06	1.30289e-06	0.16199	1.30289e-06	1.30289e-06	0.41281	0.026505	1.30289e-06
RP11-527N22.1	0.5354	0.147702	1.30289e-06	0.21203	0.00281377	1.30289e-06	0.62347	0.429623	1.30289e-06	0.15478	0.0285975	1.30289e-06	0.26716	0.0571748	1.30289e-06	0.34315	0.026505	1.30289e-06
RP11-342M3.5	0.26151	0.0088373	1.30289e-06	-0.095245	0.00268396	1.30289e-06	-0.057379	1.30289e-06	1.30289e-06	0.37305	1.30289e-06	1.30289e-06	0.45201	0.0682168	1.30289e-06	0.071497	1.30289e-06	1.30289e-06
CRNDE	0.16233	1.30289e-06	1.30289e-06	0.23009	0.00268396	1.30289e-06	-0.077585	1.30289e-06	1.30289e-06	0.70924	0.32193	1.30289e-06	0.14541	1.30289e-06	1.30289e-06	0.12115	1.30289e-06	1.30289e-06
MBLAC2	0.097065	0.00855152	1.30289e-06	0.48208	0.00116504	1.30289e-06	0.31961	0.013795	1.30289e-06	-0.22248	1.30289e-06	1.30289e-06	-0.30559	1.30289e-06	1.30289e-06	0.20942	1.30289e-06	1.30289e-06
RP1-111D6.3	0.33464	0.0585825	1.30289e-06	0.33203	0.000893829	1.30289e-06	0.23289	0.0232663	1.30289e-06	0.61202	0.361851	1.30289e-06	0.24364	0.0194803	1.30289e-06	-0.07904	1.30289e-06	1.30289e-06
SPDEF	0.33755	0.0267534	1.30289e-06	0.60473	0.000893829	1.30289e-06	0.16554	1.30289e-06	1.30289e-06	0.34972	1.30289e-06	1.30289e-06	0.45132	1.30289e-06	1.30289e-06	0.54763	0.164868	1.30289e-06
RNA5SP115	0.25358	0.0088373	1.30289e-06	0.36717	0.000893829	1.30289e-06	0.049647	1.30289e-06	1.30289e-06	0.61708	0.584875	1.30289e-06	0.30507	1.30289e-06	1.30289e-06	0.1714	0.026505	1.30289e-06
CBY1	0.14823	0.00855152	1.30289e-06	0.3174	0.000893829	1.30289e-06	0.31393	0.0978083	1.30289e-06	-0.35545	1.30289e-06	0.0542297	0.40395	0.275096	1.30289e-06	0.34207	0.0494589	1.30289e-06
RP11-482M8.1	0.1738	0.00855152	1.30289e-06	-0.1329	0.000893829	1.30289e-06	-0.30854	1.30289e-06	0.0726543	0.029606	0.0061015	1.30289e-06	-0.39545	1.30289e-06	0.827257	-0.40177	1.30289e-06	0.2523
CALML5	0.40697	0.00370684	1.30289e-06	0.14284	0.000893829	1.30289e-06	0.54277	0.027457	1.30289e-06	0.57774	0.352782	1.30289e-06	0.27627	1.30289e-06	1.30289e-06	0.055512	1.30289e-06	1.30289e-06
ZSCAN29	0.26765	0.00335876	1.30289e-06	0.25063	0.000893829	1.30289e-06	0.0055927	1.30289e-06	1.30289e-06	0.046201	1.30289e-06	1.30289e-06	0.1489	1.30289e-06	1.30289e-06	0.0835	0.026505	1.30289e-06
SAMD3	0.29336	0.00224807	1.30289e-06	0.37018	0.000893829	1.30289e-06	0.18645	0.146977	1.30289e-06	-0.021132	1.30289e-06	1.30289e-06	0.05696	1.30289e-06	1.30289e-06	-0.047677	1.30289e-06	1.30289e-06
PILRA	-0.02064	1.30289e-06	1.30289e-06	0.45228	0.000893829	1.30289e-06	0.63409	0.249209	1.30289e-06	0.24758	1.30289e-06	1.30289e-06	0.49892	0.0972201	1.30289e-06	0.78303	0.429147	1.30289e-06
ABI3BP	-0.08399	1.30289e-06	1.30289e-06	0.26084	0.000893829	1.30289e-06	0.83504	0.183374	1.30289e-06	0.65913	0.584875	1.30289e-06	0.20913	1.30289e-06	1.30289e-06	0.042305	1.30289e-06	1.30289e-06
ADRB3	-0.16821	1.30289e-06	1.30289e-06	0.33346	0.000893829	1.30289e-06	0.49642	0.181484	1.30289e-06	0.53905	0.362337	1.30289e-06	0.62863	0.296282	1.30289e-06	0.54675	0.185662	1.30289e-06
RP11-536K7.3	0.050774	1.30289e-06	1.30289e-06	0.42951	0.000893829	1.30289e-06	0.4515	0.181484	1.30289e-06	0.4943	0.343268	1.30289e-06	0.50964	0.189216	1.30289e-06	0.43923	0.103964	1.30289e-06
LINC01007	0.13874	1.30289e-06	1.30289e-06	-0.26887	0.000893829	1.30289e-06	0.49444	0.164406	1.30289e-06	0.23681	1.30289e-06	1.30289e-06	0.30662	0.0682168	1.30289e-06	0.4455	0.102551	1.30289e-06
RP11-293E1.2	-0.14179	1.30289e-06	1.30289e-06	0.56297	0.000893829	1.30289e-06	-0.051819	1.30289e-06	1.30289e-06	0.1045	0.248386	1.30289e-06	0.31628	0.00705257	1.30289e-06	0.040875	1.30289e-06	1.30289e-06
AC012363.13	0.047559	1.30289e-06	1.30289e-06	0.44832	0.000893829	1.30289e-06	0.0025538	1.30289e-06	1.30289e-06	0.47885	0.133292	1.30289e-06	0.26221	1.30289e-06	1.30289e-06	-0.14878	1.30289e-06	1.30289e-06
ZCCHC10	0.17324	1.30289e-06	1.30289e-06	-0.44341	0.000893829	0.0840359	-0.19392	1.30289e-06	0.171265	-0.29419	0.0298173	1.30289e-06	-0.011205	1.30289e-06	1.30289e-06	-0.14324	1.30289e-06	0.143418
COX6A1	-0.23471	1.30289e-06	1.30289e-06	0.030708	0.000893829	1.30289e-06	-0.34551	1.30289e-06	1.30289e-06	0.17523	1.30289e-06	1.30289e-06	0.45679	0.115545	1.30289e-06	0.36074	0.0837593	1.30289e-06
NRBF2	-0.5142	1.30289e-06	0.344279	-0.4632	0.000893829	0.0516178	-0.73004	1.30289e-06	0.0648894	0.15147	1.30289e-06	1.30289e-06	-0.17525	1.30289e-06	1.30289e-06	-0.17041	1.30289e-06	0.126424
MIR4298	-0.010266	1.30289e-06	1.30289e-06	0.5438	0.000893829	1.30289e-06	0.06959	1.30289e-06	1.30289e-06	-0.025809	1.30289e-06	1.30289e-06	-0.1475	1.30289e-06	1.30289e-06	0.19335	1.30289e-06	1.30289e-06
CTB-5E10.3	0.67538	0.304336	1.30289e-06	-0.20908	0.000346705	1.30289e-06	0.66706	0.181484	1.30289e-06	-0.022081	1.30289e-06	1.30289e-06	0.47235	0.077748	1.30289e-06	0.11762	0.026505	1.30289e-06
CCDC127	0.59149	0.220867	1.30289e-06	0.5363	0.000346705	1.30289e-06	0.47344	0.0313714	1.30289e-06	0.21142	1.30289e-06	1.30289e-06	-0.22717	1.30289e-06	1.30289e-06	0.53052	0.026505	1.30289e-06
SLC30A8	0.36397	0.218692	1.30289e-06	0.44569	0.000346705	1.30289e-06	0.19377	0.0313714	1.30289e-06	0.3435	0.397627	1.30289e-06	-0.06212	1.30289e-06	1.30289e-06	0.42787	0.131097	1.30289e-06
PLEKHF1	0.61035	0.139997	1.30289e-06	0.44338	0.000346705	1.30289e-06	0.73741	0.474042	1.30289e-06	0.083958	1.30289e-06	1.30289e-06	0.063918	1.30289e-06	1.30289e-06	0.45491	0.026505	1.30289e-06
RP11-150O12.1	0.65321	0.0966414	1.30289e-06	0.57811	0.000346705	1.30289e-06	0.56462	0.269877	1.30289e-06	0.40454	0.0427759	1.30289e-06	0.2989	0.0194803	1.30289e-06	0.52635	0.143507	1.30289e-06
WNT3	0.40513	0.0875351	1.30289e-06	0.21686	0.000346705	1.30289e-06	0.24665	0.0978083	1.30289e-06	0.095581	1.30289e-06	1.30289e-06	0.48949	0.106169	1.30289e-06	0.25658	1.30289e-06	1.30289e-06
MIR1285-1	0.50002	0.0853845	1.30289e-06	0.20444	0.000346705	1.30289e-06	0.22357	0.0812506	1.30289e-06	0.11702	1.30289e-06	1.30289e-06	0.26531	0.0194803	1.30289e-06	0.68956	0.598975	1.30289e-06
ARL17B	0.3687	0.0746436	1.30289e-06	0.30538	0.000346705	1.30289e-06	0.13673	1.30289e-06	1.30289e-06	0.19145	1.30289e-06	1.30289e-06	0.36315	0.0194803	1.30289e-06	0.49482	0.440859	1.30289e-06
NFE2L1	0.24295	0.070856	1.30289e-06	0.17877	0.000346705	1.30289e-06	0.12537	1.30289e-06	1.30289e-06	0.054442	1.30289e-06	1.30289e-06	0.21004	0.0194803	1.30289e-06	-0.083044	1.30289e-06	1.30289e-06
AC068499.10	0.38454	0.0653783	1.30289e-06	0.46049	0.000346705	1.30289e-06	0.083746	1.30289e-06	1.30289e-06	-0.13613	1.30289e-06	1.30289e-06	0.24601	0.0194803	1.30289e-06	0.20591	0.0203997	1.30289e-06
RN7SL563P	0.33607	0.0582442	1.30289e-06	0.34242	0.000346705	1.30289e-06	0.43415	0.0485522	1.30289e-06	0.45207	0.115989	1.30289e-06	0.51374	0.306714	1.30289e-06	0.065252	1.30289e-06	1.30289e-06
ZNF703	0.42974	0.0449697	1.30289e-06	0.45677	0.000346705	1.30289e-06	0.72274	0.181484	1.30289e-06	0.60398	0.291687	1.30289e-06	0.22895	1.30289e-06	1.30289e-06	0.6756	0.429147	1.30289e-06
BTN2A2	0.30866	0.0351146	1.30289e-06	0.51986	0.000346705	1.30289e-06	0.12557	1.30289e-06	1.30289e-06	0.25126	1.30289e-06	1.30289e-06	0.58398	0.0918411	1.30289e-06	0.56759	0.265713	1.30289e-06
LYL1	0.61107	0.0267534	1.30289e-06	0.52394	0.000346705	1.30289e-06	-0.055025	1.30289e-06	1.30289e-06	-0.31343	1.30289e-06	1.30289e-06	0.37373	0.0254961	1.30289e-06	0.30489	0.026505	1.30289e-06
ASTN2-AS1	0.3228	0.00855152	1.30289e-06	0.38784	0.000346705	1.30289e-06	0.3204	0.00302713	1.30289e-06	0.24549	1.30289e-06	1.30289e-06	-0.21055	1.30289e-06	1.30289e-06	0.23247	1.30289e-06	1.30289e-06
LRRC14B	0.40305	0.00855152	1.30289e-06	0.10055	0.000346705	1.30289e-06	0.13308	1.30289e-06	1.30289e-06	-0.26166	1.30289e-06	1.30289e-06	0.40301	0.0194803	1.30289e-06	0.72939	0.155848	1.30289e-06
IFNGR1	0.22495	0.00417314	1.30289e-06	0.45042	0.000346705	1.30289e-06	0.50042	0.0812506	1.30289e-06	0.55167	0.318562	1.30289e-06	0.43563	0.183514	1.30289e-06	0.25794	1.30289e-06	1.30289e-06
RP11-74C13.3	0.26578	0.00370684	1.30289e-06	0.2129	0.000346705	1.30289e-06	0.49609	0.148108	1.30289e-06	0.17743	0.280495	1.30289e-06	0.24489	0.00713159	1.30289e-06	0.40943	0.216759	1.30289e-06
SYNE1	0.47564	0.00224807	1.30289e-06	0.45689	0.000346705	1.30289e-06	0.83262	0.183374	1.30289e-06	0.114	1.30289e-06	1.30289e-06	-0.065665	1.30289e-06	1.30289e-06	0.30631	0.0630512	1.30289e-06
DLX2	0.15503	1.30289e-06	1.30289e-06	0.5097	0.000346705	1.30289e-06	0.36441	0.181484	1.30289e-06	0.29989	0.0675836	1.30289e-06	0.15518	1.30289e-06	1.30289e-06	0.54345	0.026505	1.30289e-06
STX10	0.17077	1.30289e-06	1.30289e-06	0.37767	0.000346705	1.30289e-06	0.34314	0.0726358	1.30289e-06	0.080195	1.30289e-06	1.30289e-06	0.21669	1.30289e-06	1.30289e-06	0.0070762	0.026505	1.30289e-06
STK10	0.08177	1.30289e-06	1.30289e-06	0.56472	0.000346705	1.30289e-06	0.2959	0.0726358	1.30289e-06	0.19495	1.30289e-06	1.30289e-06	0.12798	1.30289e-06	1.30289e-06	0.22301	0.0238202	1.30289e-06
MDM4	0.19455	1.30289e-06	1.30289e-06	0.49945	0.000346705	1.30289e-06	0.21417	0.0186875	1.30289e-06	0.027472	1.30289e-06	1.30289e-06	0.11376	1.30289e-06	1.30289e-06	-0.0074875	1.30289e-06	1.30289e-06
RP11-193M21.1	0.20076	1.30289e-06	1.30289e-06	0.46843	0.000346705	1.30289e-06	0.16609	0.00814156	1.30289e-06	0.18836	0.0174448	1.30289e-06	-0.054395	1.30289e-06	1.30289e-06	-0.020914	1.30289e-06	1.30289e-06
XBP1	-0.16467	1.30289e-06	1.30289e-06	-0.37697	0.000346705	0.13104	0.39224	0.00814156	1.30289e-06	-0.12423	1.30289e-06	1.30289e-06	0.29177	0.0369	1.30289e-06	-0.14471	1.30289e-06	1.30289e-06
EHBP1L1	-0.43121	1.30289e-06	0.013196	-0.10027	0.000346705	1.30289e-06	-0.52861	0.000328016	1.30289e-06	-0.30431	1.30289e-06	0.030702	-0.44666	1.30289e-06	1.30289e-06	-0.067243	0.0890631	1.30289e-06
AC100791.2	0.28889	1.30289e-06	1.30289e-06	0.4723	0.000346705	1.30289e-06	0.0605	1.30289e-06	1.30289e-06	0.64619	0.318562	1.30289e-06	0.44565	0.188405	1.30289e-06	0.1501	1.30289e-06	1.30289e-06
LPCAT2	0.067526	1.30289e-06	1.30289e-06	0.43526	0.000346705	1.30289e-06	-0.05797	1.30289e-06	1.30289e-06	0.51352	0.284812	1.30289e-06	-0.14749	1.30289e-06	1.30289e-06	0.31529	0.0115298	1.30289e-06
TMEM30C	0.22566	1.30289e-06	1.30289e-06	0.13395	0.000346705	1.30289e-06	0.11386	1.30289e-06	1.30289e-06	0.35911	0.232631	1.30289e-06	0.30774	1.30289e-06	1.30289e-06	0.25857	1.30289e-06	1.30289e-06
CCDC38	-0.26047	1.30289e-06	1.30289e-06	0.3296	0.000346705	1.30289e-06	0.29727	1.30289e-06	1.30289e-06	-0.29596	1.30289e-06	1.30289e-06	-0.17112	1.30289e-06	1.30289e-06	-0.17752	0.0162547	1.30289e-06
CBX4	0.33903	1.30289e-06	1.30289e-06	0.082077	0.000346705	1.30289e-06	0.0041173	1.30289e-06	1.30289e-06	0.16256	1.30289e-06	1.30289e-06	0.24076	0.0682168	1.30289e-06	0.18482	0.0131047	1.30289e-06
FSCN2	0.37301	1.30289e-06	1.30289e-06	0.11427	0.000346705	1.30289e-06	0.11361	1.30289e-06	1.30289e-06	-0.092102	1.30289e-06	1.30289e-06	0.21195	0.00705257	1.30289e-06	0.38618	0.0115298	1.30289e-06
PLVAP	-0.31099	1.30289e-06	1.30289e-06	0.033239	0.000346705	1.30289e-06	0.073747	1.30289e-06	1.30289e-06	-0.35934	1.30289e-06	0.278438	0.22344	0.00647472	1.30289e-06	-0.25562	1.30289e-06	1.30289e-06
KLF5	-0.15872	1.30289e-06	1.30289e-06	0.45187	0.000346705	1.30289e-06	-0.5427	1.30289e-06	0.364832	0.22508	1.30289e-06	1.30289e-06	-1.9705	1.30289e-06	1.74485	-2.8006	1.30289e-06	2.71829
APLNR	-0.046627	1.30289e-06	1.30289e-06	-0.13732	0.000346705	1.30289e-06	0.14886	1.30289e-06	1.30289e-06	0.38038	1.30289e-06	1.30289e-06	-0.17986	1.30289e-06	0.0938331	-0.43237	1.30289e-06	1.30289e-06
GPATCH2	-0.34355	1.30289e-06	0.230926	-0.0496	0.000346705	1.30289e-06	0.16645	1.30289e-06	1.30289e-06	0.01552	1.30289e-06	1.30289e-06	-0.17525	1.30289e-06	0.093478	-0.31897	1.30289e-06	0.27864
ATP6V0A1	-0.35484	1.30289e-06	0.113195	0.50196	0.000346705	1.30289e-06	-0.29891	1.30289e-06	1.30289e-06	-0.17537	1.30289e-06	1.30289e-06	-0.28905	1.30289e-06	1.30289e-06	-0.39699	1.30289e-06	0.126424
ZNF404	-0.16526	1.30289e-06	1.30289e-06	0.50782	0.000346705	1.30289e-06	0.067268	1.30289e-06	1.30289e-06	-0.0035208	1.30289e-06	1.30289e-06	0.28093	1.30289e-06	1.30289e-06	-0.27352	1.30289e-06	1.30289e-06
CTC-448F2.4	0.24227	1.30289e-06	1.30289e-06	0.43542	0.000346705	1.30289e-06	0.20497	1.30289e-06	1.30289e-06	0.083034	1.30289e-06	1.30289e-06	-0.01418	1.30289e-06	1.30289e-06	-0.13268	1.30289e-06	1.30289e-06
PLEKHH1	0.021313	1.30289e-06	1.30289e-06	0.30997	0.000346705	1.30289e-06	0.056291	1.30289e-06	1.30289e-06	0.059426	1.30289e-06	1.30289e-06	0.22006	1.30289e-06	1.30289e-06	0.087877	1.30289e-06	1.30289e-06
NEBL-AS1	-0.14753	1.30289e-06	1.30289e-06	0.49001	0.000346705	1.30289e-06	-0.28786	1.30289e-06	1.30289e-06	-0.095464	1.30289e-06	1.30289e-06	0.38576	1.30289e-06	1.30289e-06	0.4491	1.30289e-06	1.30289e-06
BHLHE40	0.5293	0.532663	1.30289e-06	0.23789	1.30289e-06	1.30289e-06	0.49429	0.00814156	1.30289e-06	0.68287	0.584875	1.30289e-06	-0.15786	1.30289e-06	1.30289e-06	0.42397	0.00645444	1.30289e-06
BTN3A2	0.42718	0.304336	1.30289e-06	0.051989	1.30289e-06	1.30289e-06	0.22735	1.30289e-06	1.30289e-06	0.23899	0.320136	1.30289e-06	0.65616	0.21602	1.30289e-06	0.75727	0.429147	1.30289e-06
TTLL12	0.32345	0.283559	1.30289e-06	0.15195	1.30289e-06	1.30289e-06	-0.015051	0.0252029	1.30289e-06	-0.18189	1.30289e-06	1.30289e-06	0.3752	0.106169	1.30289e-06	0.1492	0.0234368	1.30289e-06
PTDSS2	0.13308	0.282661	1.30289e-06	0.25954	1.30289e-06	1.30289e-06	0.22561	1.30289e-06	1.30289e-06	-0.030777	1.30289e-06	1.30289e-06	0.44127	0.000675854	1.30289e-06	0.077601	1.30289e-06	1.30289e-06
STK11	0.73581	0.280998	1.30289e-06	-0.71655	1.30289e-06	0.96662	0.29228	0.00767142	1.30289e-06	0.014313	1.30289e-06	1.30289e-06	1.6808	2.50948	1.30289e-06	1.9171	3.34679	1.30289e-06
SYT8	0.61758	0.220867	1.30289e-06	0.11041	1.30289e-06	1.30289e-06	0.35835	0.118986	1.30289e-06	0.3658	0.237711	1.30289e-06	0.42627	0.502252	1.30289e-06	-0.081761	1.30289e-06	1.30289e-06
HCN1	0.57691	0.220867	1.30289e-06	0.047154	1.30289e-06	1.30289e-06	0.36504	0.074056	1.30289e-06	0.027957	1.30289e-06	1.30289e-06	0.077711	1.30289e-06	1.30289e-06	0.17912	1.30289e-06	1.30289e-06
MIR4277	0.30955	0.220867	1.30289e-06	0.086681	1.30289e-06	1.30289e-06	0.33112	0.0313714	1.30289e-06	0.6347	0.293636	1.30289e-06	0.61865	0.151932	1.30289e-06	0.30588	0.026505	1.30289e-06
ZCCHC24	0.66716	0.220867	1.30289e-06	0.16362	1.30289e-06	1.30289e-06	0.10168	1.30289e-06	1.30289e-06	0.42081	0.198703	1.30289e-06	0.32431	0.151932	1.30289e-06	0.60396	0.143507	1.30289e-06
SCT	0.55778	0.218692	1.30289e-06	0.2314	1.30289e-06	1.30289e-06	0.20238	1.30289e-06	1.30289e-06	-0.49626	1.30289e-06	0.775193	0.18157	1.30289e-06	1.30289e-06	0.20052	0.0203997	1.30289e-06
LINC00886	0.23437	0.196177	1.30289e-06	0.3338	1.30289e-06	1.30289e-06	0.40183	0.0666226	1.30289e-06	0.64188	0.371585	1.30289e-06	-0.053402	0.117783	1.30289e-06	0.39452	0.026505	1.30289e-06
PSORS1C1	0.27113	0.168003	1.30289e-06	0.14055	1.30289e-06	1.30289e-06	0.52052	0.249209	1.30289e-06	0.31047	0.397627	1.30289e-06	0.44772	0.373624	1.30289e-06	0.61004	1.12327	1.30289e-06
PRSS45	0.4439	0.152833	1.30289e-06	0.13084	1.30289e-06	1.30289e-06	0.14899	1.30289e-06	1.30289e-06	0.38502	0.32193	1.30289e-06	0.31816	0.05039	1.30289e-06	0.11779	1.30289e-06	1.30289e-06
RP11-162N7.1	0.48579	0.147702	1.30289e-06	0.23795	1.30289e-06	1.30289e-06	0.46888	0.0978083	1.30289e-06	0.86583	0.494083	1.30289e-06	0.54627	0.0502802	1.30289e-06	0.38933	0.0502573	1.30289e-06
MCHR1	0.22504	0.147702	1.30289e-06	0.00083753	1.30289e-06	1.30289e-06	0.58804	0.0812506	1.30289e-06	-0.4813	1.30289e-06	0.804848	0.50767	0.117783	1.30289e-06	0.45064	0.0732631	1.30289e-06
SH3TC2	0.53652	0.147702	1.30289e-06	0.010881	1.30289e-06	1.30289e-06	0.41666	0.0429691	1.30289e-06	0.7215	0.365303	1.30289e-06	0.36526	0.0918411	1.30289e-06	0.57387	0.0732631	1.30289e-06
ASCL2	0.4323	0.147702	1.30289e-06	0.23484	1.30289e-06	1.30289e-06	0.3897	0.0115057	1.30289e-06	0.29915	1.30289e-06	1.30289e-06	0.32017	1.30289e-06	1.30289e-06	0.53738	0.126274	1.30289e-06
SLC6A19	0.47825	0.147702	1.30289e-06	-0.33286	1.30289e-06	0.092414	0.2697	0.00814156	1.30289e-06	0.2059	1.30289e-06	1.30289e-06	0.75959	0.246656	1.30289e-06	0.5393	0.246179	1.30289e-06
HCFC1R1	0.50391	0.147702	1.30289e-06	-0.11125	1.30289e-06	1.30289e-06	0.0015774	9.2949e-05	1.30289e-06	-0.76171	1.30289e-06	0.94091	0.077838	1.30289e-06	1.30289e-06	0.25152	0.0732631	1.30289e-06
VEZT	-0.74692	0.147702	0.0550063	-2.0034	1.30289e-06	0.280361	-1.5182	1.30289e-06	0.258195	-0.68022	0.158862	1.30289e-06	-0.56644	1.30289e-06	1.02599	-0.86083	1.30289e-06	0.836269
EOMES	0.33121	0.147702	1.30289e-06	0.2911	1.30289e-06	1.30289e-06	0.12763	1.30289e-06	1.30289e-06	0.6461	0.0592878	1.30289e-06	0.4857	0.0194803	1.30289e-06	0.19883	1.30289e-06	1.30289e-06
GATD1	0.25145	0.147702	1.30289e-06	-0.03184	1.30289e-06	1.30289e-06	-0.25552	1.30289e-06	0.197551	0.11334	1.30289e-06	1.30289e-06	0.3293	0.019384	1.30289e-06	0.58598	0.0852687	1.30289e-06
MYEOV	0.61197	0.147702	1.30289e-06	-0.77843	1.30289e-06	0.000333666	-0.30137	1.30289e-06	0.0939323	-0.15729	1.30289e-06	1.30289e-06	0.089651	0.0194803	1.30289e-06	-0.025352	0.0494589	1.30289e-06
POMGNT1	0.51537	0.147702	1.30289e-06	0.31041	1.30289e-06	1.30289e-06	0.29922	1.30289e-06	1.30289e-06	0.060222	1.30289e-06	1.30289e-06	0.89715	0.798267	1.30289e-06	0.24664	0.026505	1.30289e-06
CTD-2026K11.2	0.3249	0.147702	1.30289e-06	-0.029952	1.30289e-06	1.30289e-06	0.18644	1.30289e-06	1.30289e-06	0.0024407	1.30289e-06	1.30289e-06	0.26321	0.0393285	1.30289e-06	-0.05933	1.30289e-06	1.30289e-06
POLR2D	-2.495	0.147702	0.845804	-3.0635	1.30289e-06	0.856133	-0.8118	1.30289e-06	0.153352	-1.6136	1.30289e-06	1.21587	-0.82558	1.30289e-06	0.148751	-1.5613	1.30289e-06	0.511806
AC000120.7	0.41947	0.145205	1.30289e-06	0.23629	1.30289e-06	1.30289e-06	0.037621	1.30289e-06	1.30289e-06	0.20674	0.0891105	1.30289e-06	0.24615	1.30289e-06	1.30289e-06	0.37527	0.187994	1.30289e-06
ERLIN2	0.3528	0.139997	1.30289e-06	0.042749	1.30289e-06	1.30289e-06	0.56013	0.131627	1.30289e-06	0.39051	0.327224	1.30289e-06	0.33956	0.0194803	1.30289e-06	0.45653	0.0732631	1.30289e-06
PLA2G6	0.35311	0.139997	1.30289e-06	0.27511	1.30289e-06	1.30289e-06	0.27195	0.0130327	1.30289e-06	-0.34138	1.30289e-06	1.30289e-06	0.56018	0.145425	1.30289e-06	0.34756	0.163689	1.30289e-06
SLC50A1	0.38382	0.139997	1.30289e-06	-0.25249	1.30289e-06	1.30289e-06	0.19382	1.30289e-06	1.30289e-06	-0.17315	1.30289e-06	1.30289e-06	-0.092213	1.30289e-06	1.30289e-06	0.036092	0.00181305	1.30289e-06
RP11-399F2.2	0.38773	0.123746	1.30289e-06	0.078551	1.30289e-06	1.30289e-06	0.16762	1.30289e-06	1.30289e-06	-0.015225	1.30289e-06	1.30289e-06	0.10034	1.30289e-06	1.30289e-06	0.53503	0.227249	1.30289e-06
SRGAP2C	0.32356	0.106562	1.30289e-06	0.35963	1.30289e-06	1.30289e-06	0.1451	0.287722	1.30289e-06	-0.48143	1.30289e-06	0.507978	-0.32033	0.206523	1.30289e-06	0.40789	0.0494589	1.30289e-06
DEAF1	0.61499	0.106562	1.30289e-06	0.23877	1.30289e-06	1.30289e-06	0.41482	0.0385931	1.30289e-06	-0.21481	1.30289e-06	1.30289e-06	0.13526	0.0837646	1.30289e-06	0.34618	1.30289e-06	1.30289e-06
SYCE2	0.48919	0.0989707	1.30289e-06	-0.064003	1.30289e-06	1.30289e-06	0.6932	0.181484	1.30289e-06	-0.070033	0.118254	1.30289e-06	0.30466	0.00713159	1.30289e-06	0.45134	0.0389754	1.30289e-06
CTSW	-0.06545	0.0966414	1.30289e-06	-0.8683	1.30289e-06	0.408306	0.38624	0.0518179	1.30289e-06	-0.26757	0.041097	1.30289e-06	0.28296	1.30289e-06	1.30289e-06	0.44139	0.0494589	1.30289e-06
SUN2	0.50234	0.0953202	1.30289e-06	0.04859	1.30289e-06	1.30289e-06	0.14799	0.0645814	1.30289e-06	-0.45334	1.30289e-06	0.382743	0.21098	0.0194803	1.30289e-06	0.0086307	0.026505	1.30289e-06
RN7SKP11	0.067399	0.0909604	1.30289e-06	-0.083395	1.30289e-06	1.30289e-06	0.27994	1.30289e-06	1.30289e-06	0.14624	1.30289e-06	1.30289e-06	-0.1248	0.0736812	1.30289e-06	-0.058931	0.00454295	1.30289e-06
ATP2B4	-0.40457	0.0888131	0.0174384	0.27946	1.30289e-06	1.30289e-06	0.033619	0.0232663	1.30289e-06	0.0078453	1.30289e-06	1.30289e-06	0.30391	0.0194803	1.30289e-06	0.029595	1.30289e-06	1.30289e-06
BAG3	0.14251	0.0853845	1.30289e-06	0.30184	1.30289e-06	1.30289e-06	0.33888	0.106372	1.30289e-06	0.44869	0.304615	1.30289e-06	0.65092	0.114956	1.30289e-06	0.29165	0.026505	1.30289e-06
AP5B1	0.56541	0.0653783	1.30289e-06	0.065089	1.30289e-06	1.30289e-06	0.94364	1.11854	1.30289e-06	0.69022	0.206012	1.30289e-06	0.1318	1.30289e-06	1.30289e-06	0.54151	0.143507	1.30289e-06
ASB13	0.53245	0.0653783	1.30289e-06	0.26221	1.30289e-06	1.30289e-06	0.5973	0.249209	1.30289e-06	0.67702	0.32193	1.30289e-06	0.53935	0.151932	1.30289e-06	0.31223	0.0732631	1.30289e-06
RNF139-AS1	0.43662	0.0653783	1.30289e-06	0.10567	1.30289e-06	1.30289e-06	0.4531	0.181484	1.30289e-06	0.33861	0.00634998	1.30289e-06	0.30926	0.0442863	1.30289e-06	0.28595	0.0852687	1.30289e-06
CDCA7	0.38308	0.0653783	1.30289e-06	0.1681	1.30289e-06	1.30289e-06	0.40351	0.12053	1.30289e-06	0.5333	0.32193	1.30289e-06	0.64612	0.306714	1.30289e-06	-0.21702	1.30289e-06	1.30289e-06
CTB-49A3.4	0.097757	0.0653783	1.30289e-06	-0.27824	1.30289e-06	1.30289e-06	0.54788	0.0812506	1.30289e-06	0.070129	1.30289e-06	1.30289e-06	0.4637	0.0682168	1.30289e-06	-0.03604	1.30289e-06	1.30289e-06
RP11-419K12.1	-0.32723	0.0653783	1.30289e-06	0.17408	1.30289e-06	1.30289e-06	0.47578	0.0769084	1.30289e-06	0.33412	0.064532	1.30289e-06	0.0034219	1.30289e-06	1.30289e-06	0.24323	0.0238202	1.30289e-06
AL031594.1	0.39066	0.0653783	1.30289e-06	-0.089778	1.30289e-06	1.30289e-06	0.2962	0.0232663	1.30289e-06	-0.17456	1.30289e-06	1.30289e-06	0.65065	0.188405	1.30289e-06	0.17817	1.30289e-06	1.30289e-06
GTF3C4	-0.12619	0.0653783	1.30289e-06	-1.3281	1.30289e-06	0.493287	-2.6559	0.00102571	1.23277	-1.9683	1.30289e-06	1.13184	-2.0965	1.30289e-06	0.854449	-1.4668	1.30289e-06	0.354134
RP11-26L20.3	0.41649	0.0653783	1.30289e-06	0.20943	1.30289e-06	1.30289e-06	-0.08364	1.30289e-06	1.30289e-06	0.49006	0.248386	1.30289e-06	0.12556	1.30289e-06	1.30289e-06	0.40531	0.026505	1.30289e-06
PGLS	-0.60957	0.0653783	0.0581041	0.014045	1.30289e-06	1.30289e-06	0.10298	1.30289e-06	1.30289e-06	-1.1644	0.192234	0.577609	-0.59403	1.30289e-06	0.178765	-0.014985	0.0732631	1.30289e-06
KMO	-0.041582	0.0653783	1.30289e-06	-0.10952	1.30289e-06	1.30289e-06	0.043504	1.30289e-06	1.30289e-06	0.43797	0.0298173	1.30289e-06	-0.3656	1.30289e-06	0.0908025	0.20453	1.30289e-06	1.30289e-06
TERT	0.57877	0.0653783	1.30289e-06	0.263	1.30289e-06	1.30289e-06	-0.26851	1.30289e-06	1.30289e-06	0.20045	0.00882445	1.30289e-06	0.073864	1.30289e-06	1.30289e-06	0.94214	0.26753	1.30289e-06
SLC25A26	-0.83093	0.0653783	0.198227	-0.821	1.30289e-06	0.236669	-2.0337	1.30289e-06	2.07562	-0.97971	1.30289e-06	1.29161	-1.1982	1.30289e-06	0.148751	-0.29846	0.026505	1.30289e-06
IYD	0.39758	0.0653783	1.30289e-06	0.41839	1.30289e-06	1.30289e-06	0.072347	1.30289e-06	1.30289e-06	0.028674	1.30289e-06	1.30289e-06	0.33186	0.0168452	1.30289e-06	0.095341	1.30289e-06	1.30289e-06
ZCCHC9	-0.68067	0.0653783	0.000869894	-0.81578	1.30289e-06	0.0785268	-1.8141	1.30289e-06	0.995786	-1.6413	1.30289e-06	1.11429	-1.449	1.30289e-06	0.255121	-0.874	1.30289e-06	0.549987
NNT-AS1	0.42276	0.0653783	1.30289e-06	-0.1125	1.30289e-06	1.30289e-06	0.20653	1.30289e-06	1.30289e-06	0.11471	1.30289e-06	1.30289e-06	0.14121	1.30289e-06	1.30289e-06	-0.05102	1.30289e-06	1.30289e-06
AJ009632.3	0.42978	0.0585825	1.30289e-06	0.22109	1.30289e-06	1.30289e-06	0.3629	0.0812506	1.30289e-06	0.29501	0.078922	1.30289e-06	0.41464	0.00705257	1.30289e-06	0.029084	0.026505	1.30289e-06
OVOL1	0.24555	0.0585825	1.30289e-06	0.34078	1.30289e-06	1.30289e-06	0.2106	1.30289e-06	1.30289e-06	-1.1416	1.30289e-06	0.39952	0.13955	1.30289e-06	1.30289e-06	0.63322	0.185662	1.30289e-06
ACTN1	0.40262	0.0582442	1.30289e-06	0.36141	1.30289e-06	1.30289e-06	0.49677	0.118017	1.30289e-06	-0.19152	1.30289e-06	0.171176	0.18551	1.30289e-06	1.30289e-06	0.14243	0.0234368	1.30289e-06
RBM4B	0.40379	0.0582442	1.30289e-06	0.089678	1.30289e-06	1.30289e-06	0.1274	1.30289e-06	1.30289e-06	0.26679	1.30289e-06	1.30289e-06	0.29354	1.30289e-06	1.30289e-06	0.054215	1.30289e-06	1.30289e-06
CRIP2	0.11493	0.051324	1.30289e-06	0.27757	1.30289e-06	1.30289e-06	0.35745	0.000732403	1.30289e-06	0.2524	0.085751	1.30289e-06	0.1496	0.00705257	1.30289e-06	0.31481	0.0502954	1.30289e-06
LRRC2	0.35714	0.0458255	1.30289e-06	-0.13253	1.30289e-06	1.30289e-06	0.20072	1.30289e-06	1.30289e-06	0.30689	0.291687	1.30289e-06	0.056307	1.30289e-06	1.30289e-06	0.52044	0.0941388	1.30289e-06
CTD-2015G9.2	0.48925	0.0424349	1.30289e-06	0.046919	1.30289e-06	1.30289e-06	0.12081	1.30289e-06	1.30289e-06	0.37886	0.286509	1.30289e-06	-0.061474	1.30289e-06	1.30289e-06	0.022317	1.30289e-06	1.30289e-06
AP006621.5	0.55168	0.0424071	1.30289e-06	0.16094	1.30289e-06	1.30289e-06	-0.069236	0.0652062	1.30289e-06	0.14655	1.30289e-06	1.30289e-06	0.11585	1.30289e-06	1.30289e-06	0.26002	1.30289e-06	1.30289e-06
DYNLRB2	0.44907	0.0419285	1.30289e-06	-0.061615	1.30289e-06	1.30289e-06	0.34355	0.0726358	1.30289e-06	0.33822	0.352782	1.30289e-06	0.076222	1.30289e-06	1.30289e-06	0.094194	1.30289e-06	1.30289e-06
GTPBP10	0.45487	0.0419285	1.30289e-06	-0.070084	1.30289e-06	1.30289e-06	0.093603	1.30289e-06	1.30289e-06	0.11581	1.30289e-06	1.30289e-06	0.21431	1.30289e-06	1.30289e-06	0.29248	0.0494589	1.30289e-06
NEK10	0.47843	0.0413071	1.30289e-06	-0.011132	1.30289e-06	1.30289e-06	0.33201	0.027457	1.30289e-06	0.3443	0.0454893	1.30289e-06	0.51689	0.395364	1.30289e-06	0.61503	0.272443	1.30289e-06
MIR4489	0.31969	0.0351146	1.30289e-06	0.098639	1.30289e-06	1.30289e-06	0.54894	0.212387	1.30289e-06	-0.029255	0.28687	1.30289e-06	0.17234	1.30289e-06	1.30289e-06	0.234	0.026505	1.30289e-06
ALS2CL	0.17644	0.0351146	1.30289e-06	-0.64963	1.30289e-06	0.0372179	0.32758	0.181484	1.30289e-06	0.30341	1.30289e-06	1.30289e-06	0.18088	0.05039	1.30289e-06	0.28293	0.0494589	1.30289e-06
AC007563.5	0.44899	0.0351146	1.30289e-06	0.0079298	1.30289e-06	1.30289e-06	0.24711	0.159057	1.30289e-06	0.59699	0.436898	1.30289e-06	0.51995	0.0776234	1.30289e-06	0.42027	0.026505	1.30289e-06
PODXL	0.35197	0.0351146	1.30289e-06	0.17703	1.30289e-06	1.30289e-06	0.57371	0.0812506	1.30289e-06	-0.20902	0.32193	1.30289e-06	0.71887	0.296282	1.30289e-06	0.66591	0.835528	1.30289e-06
POMC	0.36735	0.0351146	1.30289e-06	0.40527	1.30289e-06	1.30289e-06	0.18349	1.30289e-06	1.30289e-06	0.53583	0.28687	1.30289e-06	0.17614	1.30289e-06	1.30289e-06	0.35962	0.0260957	1.30289e-06
RN7SL709P	0.44098	0.0351146	1.30289e-06	0.122	1.30289e-06	1.30289e-06	-0.020419	1.30289e-06	1.30289e-06	0.38254	0.0796669	1.30289e-06	0.2385	1.30289e-06	1.30289e-06	0.33678	0.0890631	1.30289e-06
ENDOV	0.44417	0.0351146	1.30289e-06	0.34971	1.30289e-06	1.30289e-06	-0.0186	1.30289e-06	1.30289e-06	0.15447	0.00239216	1.30289e-06	0.19258	1.30289e-06	1.30289e-06	0.3683	0.0630512	1.30289e-06
IL10RB-AS1	0.26509	0.0351146	1.30289e-06	-0.21185	1.30289e-06	1.30289e-06	0.070364	1.30289e-06	1.30289e-06	-0.36615	1.30289e-06	1.30289e-06	0.27394	0.167688	1.30289e-06	0.087225	1.30289e-06	1.30289e-06
DDR1	0.31358	0.0351146	1.30289e-06	0.25939	1.30289e-06	1.30289e-06	0.07159	1.30289e-06	1.30289e-06	0.15956	1.30289e-06	1.30289e-06	0.42333	0.0254961	1.30289e-06	0.33322	1.30289e-06	1.30289e-06
NFASC	0.3621	0.0351146	1.30289e-06	-0.12892	1.30289e-06	1.30289e-06	-0.11881	1.30289e-06	1.30289e-06	0.09058	1.30289e-06	1.30289e-06	-0.2536	1.30289e-06	1.30289e-06	-0.28256	1.30289e-06	1.30289e-06
NNT	0.38651	0.0351146	1.30289e-06	0.026098	1.30289e-06	1.30289e-06	-0.24482	1.30289e-06	1.30289e-06	-0.084824	1.30289e-06	1.30289e-06	-0.12396	1.30289e-06	1.30289e-06	-0.2517	1.30289e-06	1.30289e-06
EHD1	0.36909	0.0351146	1.30289e-06	0.037662	1.30289e-06	1.30289e-06	0.10118	1.30289e-06	1.30289e-06	0.065359	1.30289e-06	1.30289e-06	0.11547	1.30289e-06	1.30289e-06	0.1545	1.30289e-06	1.30289e-06
YBEY	0.10831	0.0351146	1.30289e-06	-0.23688	1.30289e-06	0.133937	-0.63103	1.30289e-06	1.36623	-0.15804	1.30289e-06	1.30289e-06	-0.016248	1.30289e-06	1.30289e-06	-0.049863	1.30289e-06	1.30289e-06
CRIPAK	0.072061	0.0303656	1.30289e-06	-0.009295	1.30289e-06	1.30289e-06	0.66497	0.181484	1.30289e-06	0.31185	0.0842388	1.30289e-06	0.41722	0.121879	1.30289e-06	0.75495	0.112548	1.30289e-06
TRPT1	0.38376	0.0303656	1.30289e-06	0.029569	1.30289e-06	1.30289e-06	-0.69255	0.0313714	0.148958	-0.44467	1.30289e-06	0.0309678	-0.11796	1.30289e-06	1.30289e-06	-0.1202	1.30289e-06	1.30289e-06
GSTM2	0.40651	0.0303656	1.30289e-06	-0.36061	1.30289e-06	0.0081035	-0.093555	0.0198284	1.30289e-06	-0.43412	1.30289e-06	0.275129	0.23877	1.30289e-06	1.30289e-06	-0.021501	1.30289e-06	1.30289e-06
RP11-336A10.5	0.43652	0.0303656	1.30289e-06	0.20801	1.30289e-06	1.30289e-06	0.06159	1.30289e-06	1.30289e-06	0.33052	0.0277643	1.30289e-06	0.25554	0.00705257	1.30289e-06	0.20894	1.30289e-06	1.30289e-06
PSORS1C2	0.56887	0.0303656	1.30289e-06	-0.16804	1.30289e-06	1.30289e-06	-0.18955	1.30289e-06	1.30289e-06	-0.077785	1.30289e-06	1.30289e-06	0.19612	0.0168452	1.30289e-06	0.46257	0.0238202	1.30289e-06
CTD-2228K2.7	0.27794	0.0303656	1.30289e-06	0.16388	1.30289e-06	1.30289e-06	0.13835	1.30289e-06	1.30289e-06	-0.10015	1.30289e-06	1.30289e-06	0.22013	0.202558	1.30289e-06	0.14396	1.30289e-06	1.30289e-06
E2F3	0.22949	0.0303656	1.30289e-06	-0.0097554	1.30289e-06	1.30289e-06	0.14687	1.30289e-06	1.30289e-06	-0.076818	1.30289e-06	1.30289e-06	-0.52494	1.30289e-06	0.0406833	-0.046767	1.30289e-06	1.30289e-06
ARHGDIB	0.3967	0.0267534	1.30289e-06	-0.066238	1.30289e-06	1.30289e-06	0.44159	0.12053	1.30289e-06	0.48735	0.482391	1.30289e-06	0.68524	0.21602	1.30289e-06	0.39395	0.026505	1.30289e-06
RP11-414H17.5	0.27663	0.0267534	1.30289e-06	0.21546	1.30289e-06	1.30289e-06	0.12266	0.117473	1.30289e-06	0.27392	0.224991	1.30289e-06	0.35511	0.115545	1.30289e-06	0.12811	0.026505	1.30289e-06
LINC00609	0.19189	0.0261954	1.30289e-06	0.096846	1.30289e-06	1.30289e-06	0.15291	0.00814156	1.30289e-06	0.10812	1.30289e-06	1.30289e-06	-0.18268	1.30289e-06	1.30289e-06	0.048975	1.30289e-06	1.30289e-06
KLHL18	0.24928	0.0261954	1.30289e-06	-0.35345	1.30289e-06	0.133937	-0.73264	1.30289e-06	0.0871564	-0.14722	0.0141722	1.30289e-06	0.3555	1.30289e-06	1.30289e-06	0.10522	1.30289e-06	1.30289e-06
MEI1	0.33625	0.0259002	1.30289e-06	0.39842	1.30289e-06	1.30289e-06	0.3694	0.181484	1.30289e-06	-0.1213	1.30289e-06	1.30289e-06	0.51085	0.277153	1.30289e-06	0.31608	0.026505	1.30289e-06
PLD1	0.21432	0.0249682	1.30289e-06	0.20354	1.30289e-06	1.30289e-06	0.69312	0.115506	1.30289e-06	0.098227	1.30289e-06	1.30289e-06	0.018731	1.30289e-06	1.30289e-06	0.16703	0.026505	1.30289e-06
RNU6-979P	0.33442	0.0232764	0.23985	-0.022248	1.30289e-06	0.199778	0.22881	1.30289e-06	0.220462	0.23087	0.041097	0.261942	0.18546	1.30289e-06	0.255121	-0.060378	1.30289e-06	0.269903
RPGRIP1L	0.3211	0.0232764	1.30289e-06	0.096572	1.30289e-06	0.0232984	0.1213	1.30289e-06	1.30289e-06	0.25099	0.0285975	1.30289e-06	0.15223	1.30289e-06	1.30289e-06	-0.12563	1.30289e-06	1.30289e-06
CTD-3051D23.1	0.30895	0.0230561	1.30289e-06	0.085987	1.30289e-06	1.30289e-06	0.51294	0.287722	1.30289e-06	-0.073315	1.30289e-06	1.30289e-06	0.36923	1.30289e-06	1.30289e-06	0.064965	1.30289e-06	1.30289e-06
PRICKLE2-AS2	0.17225	0.0208697	1.30289e-06	0.031887	1.30289e-06	1.30289e-06	0.27686	0.181484	1.30289e-06	0.4112	0.405581	1.30289e-06	0.66789	0.660944	1.30289e-06	0.57551	1.21721	1.30289e-06
ANKRD55	0.23646	0.0208697	1.30289e-06	0.23164	1.30289e-06	1.30289e-06	0.19393	0.181484	1.30289e-06	0.061086	1.30289e-06	1.30289e-06	0.29048	1.30289e-06	1.30289e-06	0.66407	0.163689	1.30289e-06
CTD-2278I10.6	0.32467	0.0208697	1.30289e-06	0.13468	1.30289e-06	1.30289e-06	0.64693	0.164406	1.30289e-06	0.62026	0.167867	1.30289e-06	0.37936	0.174891	1.30289e-06	0.4195	1.30289e-06	1.30289e-06
CTD-2538G9.5	0.25389	0.0208697	1.30289e-06	0.0052629	1.30289e-06	1.30289e-06	0.48812	0.0726358	1.30289e-06	-0.14458	1.30289e-06	1.30289e-06	-0.17498	1.30289e-06	1.30289e-06	0.28505	0.026505	1.30289e-06
NBEAL2	0.3445	0.0208697	1.30289e-06	0.20952	1.30289e-06	1.30289e-06	0.22015	0.00814156	1.30289e-06	0.063805	1.30289e-06	1.30289e-06	0.29854	1.30289e-06	1.30289e-06	0.44419	0.145356	1.30289e-06
DGKQ	0.51415	0.0208697	1.30289e-06	0.21467	1.30289e-06	1.30289e-06	0.38716	0.00697533	1.30289e-06	0.42929	0.42861	1.30289e-06	0.54581	0.560053	1.30289e-06	0.55619	0.0732631	1.30289e-06
CASC8	-0.32166	0.0208697	1.30289e-06	0.012281	1.30289e-06	1.30289e-06	-0.35516	1.30289e-06	1.30289e-06	0.27129	0.0285975	1.30289e-06	0.045084	1.30289e-06	1.30289e-06	-0.30508	1.30289e-06	1.30289e-06
RP5-1039K5.13	0.34205	0.0208697	1.30289e-06	-0.10013	1.30289e-06	1.30289e-06	-0.1718	1.30289e-06	1.30289e-06	0.11108	1.30289e-06	1.30289e-06	0.39807	0.00841202	1.30289e-06	0.0098812	1.30289e-06	1.30289e-06
RP11-25C19.3	0.01065	0.0158518	1.30289e-06	0.27656	1.30289e-06	1.30289e-06	-0.16585	1.30289e-06	1.30289e-06	0.43472	0.436898	1.30289e-06	0.3555	1.30289e-06	1.30289e-06	0.53588	0.0732631	1.30289e-06
UVSSA	0.47098	0.014336	1.30289e-06	-0.036486	1.30289e-06	1.30289e-06	-0.020617	0.0726358	1.30289e-06	0.14284	1.30289e-06	1.30289e-06	0.37645	0.0194803	1.30289e-06	0.0090345	1.30289e-06	1.30289e-06
APOBEC3B	0.39826	0.0136955	1.30289e-06	0.31563	1.30289e-06	1.30289e-06	0.28664	0.0266421	1.30289e-06	-0.27126	1.30289e-06	0.29916	0.77416	0.264298	1.30289e-06	0.5972	0.113034	1.30289e-06
RNF115	0.1005	0.0136955	1.30289e-06	0.043141	1.30289e-06	1.30289e-06	0.49104	0.0127691	1.30289e-06	-0.56179	1.30289e-06	0.060339	-0.13434	1.30289e-06	1.30289e-06	-0.43196	1.30289e-06	0.13624
CYBRD1	0.31996	0.0088373	1.30289e-06	0.16299	1.30289e-06	1.30289e-06	0.74459	0.181484	1.30289e-06	0.95231	0.494083	1.30289e-06	0.15069	0.141926	1.30289e-06	0.20005	1.30289e-06	1.30289e-06
SMN2	-1.6949	0.0088373	0.687353	-1.6363	1.30289e-06	0.576271	-1.4867	1.30289e-06	1.20704	-1.7625	1.30289e-06	0.769768	-1.0094	1.30289e-06	0.517271	-1.3618	1.30289e-06	0.655358
RP11-110L15.1	0.2734	0.00855152	1.30289e-06	0.50193	1.30289e-06	1.30289e-06	0.78971	0.238461	1.30289e-06	0.69692	0.42798	1.30289e-06	0.34664	0.358374	1.30289e-06	0.4924	0.164868	1.30289e-06
ZHX2	0.41502	0.00855152	1.30289e-06	0.20635	1.30289e-06	1.30289e-06	0.73668	0.181484	1.30289e-06	0.40721	0.397627	1.30289e-06	0.52727	0.0972201	1.30289e-06	0.34745	0.00548928	1.30289e-06
AC105914.1	0.27419	0.00855152	1.30289e-06	0.072631	1.30289e-06	1.30289e-06	0.65855	0.181484	1.30289e-06	0.67344	0.323835	1.30289e-06	0.57047	0.1411	1.30289e-06	0.29741	0.026505	1.30289e-06
PLEKHD1	0.47241	0.00855152	1.30289e-06	-0.37885	1.30289e-06	1.30289e-06	0.6363	0.181484	1.30289e-06	0.048515	0.0112908	1.30289e-06	0.20409	0.106169	1.30289e-06	0.7338	0.143507	1.30289e-06
SP5	0.36928	0.00855152	1.30289e-06	0.41402	1.30289e-06	1.30289e-06	0.59453	0.117473	1.30289e-06	1.0247	0.568676	1.30289e-06	0.1679	1.30289e-06	1.30289e-06	0.38587	0.00548928	1.30289e-06
HTRA1	0.482	0.00855152	1.30289e-06	0.40767	1.30289e-06	1.30289e-06	0.47005	0.0726358	1.30289e-06	0.10183	1.30289e-06	1.30289e-06	-0.017201	0.0168452	1.30289e-06	-0.22144	1.30289e-06	1.30289e-06
MIR1207	0.090061	0.00855152	1.30289e-06	0.34738	1.30289e-06	1.30289e-06	-0.079887	0.00213066	1.30289e-06	0.31143	0.148958	1.30289e-06	-0.16688	1.30289e-06	1.30289e-06	0.035823	1.30289e-06	1.30289e-06
FAM126B	0.20461	0.00855152	1.30289e-06	-0.053607	1.30289e-06	1.30289e-06	0.046953	1.30289e-06	1.30289e-06	0.67535	0.722405	1.30289e-06	0.19575	1.30289e-06	1.30289e-06	-0.011473	1.30289e-06	1.30289e-06
COMMD3	-0.29024	0.00855152	0.185423	-0.17483	1.30289e-06	1.30289e-06	-1.7313	1.30289e-06	1.56292	-0.2603	1.30289e-06	0.160889	-2.2683	1.30289e-06	1.02329	-1.2894	1.30289e-06	1.13204
FNDC3B	0.22721	0.00855152	1.30289e-06	-1.0336	1.30289e-06	0.933689	0.07483	1.30289e-06	1.30289e-06	-1.3383	1.30289e-06	2.07743	-0.28485	1.30289e-06	0.83954	-1.5185	1.30289e-06	2.3974
CKMT2-AS1	0.33211	0.00855152	1.30289e-06	0.34644	1.30289e-06	1.30289e-06	0.0020657	1.30289e-06	1.30289e-06	0.11642	1.30289e-06	1.30289e-06	0.16833	1.30289e-06	1.30289e-06	-0.01304	1.30289e-06	1.30289e-06
LINC00303	0.19623	0.00417314	1.30289e-06	0.30874	1.30289e-06	1.30289e-06	0.45048	0.0726358	1.30289e-06	0.40111	1.30289e-06	1.30289e-06	-0.030898	1.30289e-06	1.30289e-06	0.14594	1.30289e-06	1.30289e-06
ZNF311	0.19232	0.00417314	1.30289e-06	0.068832	1.30289e-06	1.30289e-06	0.34715	0.0115057	1.30289e-06	0.26282	1.30289e-06	1.30289e-06	0.45498	0.0970686	1.30289e-06	0.22183	1.30289e-06	1.30289e-06
SETD9	-0.1794	0.00417314	1.30289e-06	-0.14081	1.30289e-06	1.30289e-06	0.52799	0.00814156	1.30289e-06	0.085546	1.30289e-06	1.30289e-06	0.09488	1.30289e-06	1.30289e-06	0.039373	1.30289e-06	1.30289e-06
EEF1AKMT2	0.2698	0.00417314	1.30289e-06	-0.060067	1.30289e-06	1.30289e-06	0.18238	1.30289e-06	1.30289e-06	0.35612	0.205274	1.30289e-06	-0.042399	1.30289e-06	1.30289e-06	0.085891	1.30289e-06	1.30289e-06
DRD4	0.45014	0.00370684	1.30289e-06	0.33306	1.30289e-06	1.30289e-06	0.75458	0.181484	1.30289e-06	-0.1677	1.30289e-06	1.30289e-06	0.32462	1.30289e-06	1.30289e-06	0.20678	0.026505	1.30289e-06
RP11-414H23.3	0.074386	0.00370684	1.30289e-06	0.34995	1.30289e-06	1.30289e-06	0.52812	0.159057	1.30289e-06	0.24572	0.201129	1.30289e-06	0.2963	1.30289e-06	1.30289e-06	0.37558	0.026505	1.30289e-06
FOXC2	0.17855	0.00370684	1.30289e-06	0.3432	1.30289e-06	1.30289e-06	0.23119	0.106372	1.30289e-06	0.46424	0.494083	1.30289e-06	0.31947	0.0442863	1.30289e-06	-0.02694	1.30289e-06	1.30289e-06
ZMIZ1	0.26889	0.00370684	1.30289e-06	0.31931	1.30289e-06	1.30289e-06	0.13593	0.0336297	1.30289e-06	0.7108	0.116816	1.30289e-06	-1.1365	1.30289e-06	0.58838	0.51532	1.30289e-06	1.30289e-06
CTD-2249K22.1	0.11679	0.00370684	1.30289e-06	-0.11583	1.30289e-06	1.30289e-06	0.30639	0.027457	1.30289e-06	0.26195	0.085751	1.30289e-06	-0.1143	1.30289e-06	1.30289e-06	0.082421	1.30289e-06	1.30289e-06
RP4-676L2.1	0.17438	0.00370684	1.30289e-06	0.14155	1.30289e-06	1.30289e-06	0.21159	0.0262396	1.30289e-06	0.32933	0.361173	1.30289e-06	0.65754	0.296282	1.30289e-06	0.53055	0.334813	1.30289e-06
MIR33A	0.23041	0.00370684	1.30289e-06	0.02665	1.30289e-06	1.30289e-06	0.23494	0.00814156	1.30289e-06	-0.10482	1.30289e-06	1.30289e-06	0.46263	0.119473	1.30289e-06	0.24762	0.0721853	1.30289e-06
RAB3A	0.17323	0.00370684	1.30289e-06	0.45507	1.30289e-06	1.30289e-06	0.23771	0.00814156	1.30289e-06	-0.58335	1.30289e-06	0.601048	0.17276	1.30289e-06	1.30289e-06	0.47179	0.0494589	1.30289e-06
CTC-236F12.4	0.19622	0.00370684	1.30289e-06	0.31987	1.30289e-06	1.30289e-06	0.056221	1.30289e-06	1.30289e-06	-0.048478	1.30289e-06	1.30289e-06	0.10168	1.30289e-06	1.30289e-06	-0.22421	0.026505	1.30289e-06
AKR1C3	0.18244	0.00370684	1.30289e-06	-0.1882	1.30289e-06	1.30289e-06	-0.22015	1.30289e-06	1.30289e-06	0.12755	1.30289e-06	1.30289e-06	0.28463	0.0528149	1.30289e-06	0.1664	0.0203997	1.30289e-06
IFI30	0.37531	0.00370684	1.30289e-06	0.036479	1.30289e-06	1.30289e-06	0.072079	1.30289e-06	1.30289e-06	-0.41073	1.30289e-06	0.327036	0.12173	1.30289e-06	1.30289e-06	-0.13716	1.30289e-06	1.30289e-06
RP13-46H24.1	0.44527	0.00370684	1.30289e-06	-0.090771	1.30289e-06	1.30289e-06	-0.20564	1.30289e-06	1.30289e-06	0.17232	1.30289e-06	1.30289e-06	0.27493	1.30289e-06	1.30289e-06	0.42489	1.30289e-06	1.30289e-06
LGMN	0.30461	0.00335876	1.30289e-06	0.18853	1.30289e-06	1.30289e-06	0.47969	0.0726358	1.30289e-06	0.39332	0.151761	1.30289e-06	0.12433	1.30289e-06	1.30289e-06	0.18281	1.30289e-06	1.30289e-06
NSUN4	-1.0351	0.00335876	0.156098	-0.45017	1.30289e-06	1.30289e-06	-1.223	1.30289e-06	0.470135	-0.44548	0.0859267	0.188098	-0.7336	1.30289e-06	0.785999	-0.42983	1.30289e-06	1.30289e-06
SDHA	0.21359	0.00335876	1.30289e-06	0.064435	1.30289e-06	1.30289e-06	-0.9017	1.30289e-06	0.495238	-0.34027	1.30289e-06	0.0485479	0.6362	0.246656	1.30289e-06	0.11852	1.30289e-06	1.30289e-06
HIST2H2BA	-1.0513	0.00335876	0.505008	-1.1485	1.30289e-06	0.852293	-1.1371	1.30289e-06	0.40862	-1.3487	1.30289e-06	0.805627	-1.0736	1.30289e-06	0.568364	-0.62039	1.30289e-06	0.789219
RP11-788H18.1	0.16799	0.00335876	1.30289e-06	0.23983	1.30289e-06	1.30289e-06	0.0040315	1.30289e-06	1.30289e-06	0.31685	1.30289e-06	1.30289e-06	0.2247	1.30289e-06	1.30289e-06	0.20912	1.30289e-06	1.30289e-06
PLOD2	0.13399	0.00224807	1.30289e-06	-0.19279	1.30289e-06	1.30289e-06	0.25177	0.0232663	1.30289e-06	0.338	0.0445716	1.30289e-06	0.34709	1.30289e-06	1.30289e-06	0.087016	1.30289e-06	1.30289e-06
TMEM59L	0.21688	0.00224807	1.30289e-06	0.20078	1.30289e-06	1.30289e-06	0.34606	0.0232663	1.30289e-06	0.1651	1.30289e-06	1.30289e-06	-0.27378	1.30289e-06	1.30289e-06	0.3439	0.489168	1.30289e-06
EDEM1	0.19109	0.00224807	1.30289e-06	0.14699	1.30289e-06	1.30289e-06	0.44896	0.00868973	1.30289e-06	0.75925	0.494083	1.30289e-06	0.33655	0.151932	1.30289e-06	0.091518	1.30289e-06	1.30289e-06
NLRC5	0.21001	0.00224807	1.30289e-06	0.064055	1.30289e-06	1.30289e-06	0.0077498	1.30289e-06	1.30289e-06	0.59551	0.365303	1.30289e-06	0.0098386	1.30289e-06	1.30289e-06	0.03057	1.30289e-06	1.30289e-06
C11orf65	0.13995	0.00224807	1.30289e-06	0.022191	1.30289e-06	1.30289e-06	-0.16304	1.30289e-06	0.153352	0.38263	0.0741328	1.30289e-06	-0.32941	1.30289e-06	1.30289e-06	-0.38725	1.30289e-06	1.30289e-06
RP11-315I20.3	0.23576	0.00224807	1.30289e-06	0.060537	1.30289e-06	1.30289e-06	-0.19762	1.30289e-06	1.30289e-06	0.18694	0.0184904	1.30289e-06	0.41491	0.0194803	1.30289e-06	0.57774	0.0630512	1.30289e-06
RIN3	0.23401	0.00224807	1.30289e-06	0.38414	1.30289e-06	1.30289e-06	0.0074632	1.30289e-06	1.30289e-06	-0.097889	1.30289e-06	1.30289e-06	0.057961	1.30289e-06	1.30289e-06	0.2526	0.026505	1.30289e-06
NTHL1	-0.069155	0.00224807	1.30289e-06	0.28804	1.30289e-06	1.30289e-06	0.39867	1.30289e-06	1.30289e-06	0.35409	1.30289e-06	1.30289e-06	-0.091784	1.30289e-06	1.30289e-06	0.17644	0.026505	1.30289e-06
PSMC1	-2.6551	0.00224807	1.1248	-2.8759	1.30289e-06	1.22045	-3.4817	1.30289e-06	1.37454	-4.1892	1.30289e-06	1.39025	-4.1507	1.30289e-06	1.46232	-2.7584	1.30289e-06	0.813061
FRY-AS1	-0.04422	0.00224807	1.30289e-06	-0.2061	1.30289e-06	1.30289e-06	0.10177	1.30289e-06	1.30289e-06	-0.097417	1.30289e-06	1.30289e-06	-0.2278	1.30289e-06	0.148751	-0.29278	1.30289e-06	0.100809
MAST1	0.021427	0.00224807	1.30289e-06	-0.0087374	1.30289e-06	1.30289e-06	-0.43085	1.30289e-06	0.759918	-0.63341	1.30289e-06	0.452108	-0.3001	1.30289e-06	0.112446	-0.29968	1.30289e-06	1.30289e-06
RP11-439A17.7	0.040286	0.00224807	1.30289e-06	0.1099	1.30289e-06	1.30289e-06	-1.1818	1.30289e-06	0.953345	-1.01	1.30289e-06	0.267201	-0.20664	1.30289e-06	1.30289e-06	-0.44083	1.30289e-06	1.30289e-06
RHOD	0.21483	0.00140896	1.30289e-06	-0.022949	1.30289e-06	1.30289e-06	0.34592	0.0726358	1.30289e-06	-0.19475	1.30289e-06	0.214111	0.076198	1.30289e-06	1.30289e-06	0.34458	1.30289e-06	1.30289e-06
RAPGEF4	-0.069803	0.00140896	1.30289e-06	-0.12694	1.30289e-06	1.30289e-06	0.21389	0.0313714	1.30289e-06	0.50557	0.327224	1.30289e-06	-0.087663	1.30289e-06	1.30289e-06	0.29873	1.30289e-06	1.30289e-06
RP11-496I9.1	0.06941	0.00140896	1.30289e-06	0.30947	1.30289e-06	1.30289e-06	0.17234	1.30289e-06	1.30289e-06	-0.010047	1.30289e-06	1.30289e-06	0.27312	1.30289e-06	1.30289e-06	-0.23786	1.30289e-06	1.30289e-06
LRRC3B	0.064058	1.30289e-06	1.30289e-06	0.089861	1.30289e-06	1.30289e-06	0.62238	0.415117	1.30289e-06	0.59803	0.403086	1.30289e-06	0.16085	1.30289e-06	1.30289e-06	0.56609	0.128691	1.30289e-06
IFNE	0.12217	1.30289e-06	1.30289e-06	0.31107	1.30289e-06	1.30289e-06	0.91337	0.281585	1.30289e-06	0.61072	0.397627	1.30289e-06	0.24028	0.00705257	1.30289e-06	0.48868	0.145356	1.30289e-06
LYPD5	0.33143	1.30289e-06	1.30289e-06	0.080265	1.30289e-06	1.30289e-06	0.57329	0.281585	1.30289e-06	0.51885	0.256772	1.30289e-06	0.036071	0.0194803	1.30289e-06	0.14285	1.30289e-06	1.30289e-06
HNF4G	-0.066795	1.30289e-06	1.30289e-06	0.15893	1.30289e-06	1.30289e-06	0.50214	0.281585	1.30289e-06	0.36917	0.133332	1.30289e-06	0.21044	1.30289e-06	1.30289e-06	0.1697	0.026505	1.30289e-06
GSTM5	-0.48729	1.30289e-06	0.0825486	-0.2197	1.30289e-06	1.30289e-06	0.80926	0.281585	1.30289e-06	-0.43476	1.30289e-06	0.0339785	0.18704	1.30289e-06	1.30289e-06	-0.0053766	1.30289e-06	1.30289e-06
TEF	-0.020124	1.30289e-06	1.30289e-06	0.0266	1.30289e-06	1.30289e-06	0.6703	0.276364	1.30289e-06	-0.38632	1.30289e-06	0.0264187	0.45705	1.30289e-06	1.30289e-06	0.53361	0.143507	1.30289e-06
AC007163.6	0.00058569	1.30289e-06	1.30289e-06	0.15539	1.30289e-06	1.30289e-06	0.68103	0.249209	1.30289e-06	0.59265	0.482391	1.30289e-06	0.29134	1.30289e-06	1.30289e-06	0.36448	0.0732631	1.30289e-06
PDE4D	-0.00058004	1.30289e-06	1.30289e-06	-0.11375	1.30289e-06	1.30289e-06	0.91737	0.249209	1.30289e-06	0.42842	0.0922018	1.30289e-06	0.86533	0.188405	1.30289e-06	1.0666	0.835528	1.30289e-06
GHR	0.16477	1.30289e-06	1.30289e-06	-0.058384	1.30289e-06	1.30289e-06	0.47393	0.249209	1.30289e-06	0.071811	1.30289e-06	1.30289e-06	0.47555	0.151024	1.30289e-06	0.2241	0.026505	1.30289e-06
PIK3C2B	0.10109	1.30289e-06	1.30289e-06	-0.1207	1.30289e-06	1.30289e-06	0.43577	0.249209	1.30289e-06	0.043037	1.30289e-06	1.30289e-06	0.45934	0.0194803	1.30289e-06	0.19616	0.00645444	1.30289e-06
SMG9	0.04226	1.30289e-06	1.30289e-06	-1.1603	1.30289e-06	1.25222	0.5266	0.249209	1.30289e-06	-0.10136	1.30289e-06	1.30289e-06	-0.024456	1.30289e-06	1.30289e-06	-0.15039	1.30289e-06	0.725992
GSTM3	0.1879	1.30289e-06	1.30289e-06	0.072394	1.30289e-06	1.30289e-06	0.12191	0.212387	1.30289e-06	0.32916	0.147502	1.30289e-06	0.053133	1.30289e-06	1.30289e-06	0.19808	0.0203997	1.30289e-06
RP13-20L14.1	0.15534	1.30289e-06	1.30289e-06	0.07966	1.30289e-06	1.30289e-06	0.45187	0.183374	1.30289e-06	0.31206	0.0277643	1.30289e-06	-0.10455	1.30289e-06	1.30289e-06	0.25855	0.026505	1.30289e-06
RP11-15A1.7	0.02925	1.30289e-06	1.30289e-06	-0.16886	1.30289e-06	1.30289e-06	0.81609	0.183374	1.30289e-06	0.093446	1.30289e-06	1.30289e-06	-0.18176	1.30289e-06	1.30289e-06	0.24593	0.026505	1.30289e-06
RP11-1049H7.2	0.12402	1.30289e-06	1.30289e-06	0.22674	1.30289e-06	1.30289e-06	0.51337	0.181484	1.30289e-06	0.88398	0.584875	1.30289e-06	0.56163	0.189216	1.30289e-06	0.56679	0.0848852	1.30289e-06
RP11-74C13.4	0.082083	1.30289e-06	1.30289e-06	-0.010916	1.30289e-06	1.30289e-06	0.43478	0.181484	1.30289e-06	0.39978	0.42798	1.30289e-06	0.094352	1.30289e-06	1.30289e-06	0.26262	0.026505	1.30289e-06
AHI1	0.31972	1.30289e-06	1.30289e-06	0.035039	1.30289e-06	1.30289e-06	0.77867	0.181484	1.30289e-06	0.49378	0.32193	1.30289e-06	-0.27067	1.30289e-06	1.30289e-06	0.061768	1.30289e-06	1.30289e-06
EXPH5	0.14166	1.30289e-06	1.30289e-06	0.11985	1.30289e-06	1.30289e-06	0.43332	0.181484	1.30289e-06	0.64282	0.318562	1.30289e-06	0.18939	1.30289e-06	1.30289e-06	0.41469	0.026505	1.30289e-06
ANKRD34B	-0.20451	1.30289e-06	1.30289e-06	0.24073	1.30289e-06	1.30289e-06	0.31962	0.181484	1.30289e-06	0.17955	0.242706	1.30289e-06	-0.26064	1.30289e-06	1.30289e-06	-0.20021	1.30289e-06	1.30289e-06
LRRIQ1	-0.16736	1.30289e-06	1.30289e-06	-0.27854	1.30289e-06	0.133937	0.44859	0.181484	1.30289e-06	0.37839	0.144646	1.30289e-06	0.0065743	1.30289e-06	1.30289e-06	-0.12892	1.30289e-06	1.30289e-06
COL1A2	0.17867	1.30289e-06	1.30289e-06	-0.022676	1.30289e-06	1.30289e-06	0.54176	0.181484	1.30289e-06	0.32604	0.108611	1.30289e-06	0.45067	0.206523	1.30289e-06	0.61765	0.133685	1.30289e-06
CALML3	0.4455	1.30289e-06	1.30289e-06	0.41893	1.30289e-06	1.30289e-06	0.80375	0.181484	1.30289e-06	0.63387	0.0298173	1.30289e-06	0.21325	1.30289e-06	1.30289e-06	0.17209	0.0238202	1.30289e-06
PICK1	0.25073	1.30289e-06	1.30289e-06	0.45178	1.30289e-06	1.30289e-06	0.22852	0.181484	1.30289e-06	0.26	1.30289e-06	1.30289e-06	0.4089	0.00705257	1.30289e-06	0.47113	0.0852687	1.30289e-06
RP13-870H17.3	0.157	1.30289e-06	1.30289e-06	-0.072391	1.30289e-06	1.30289e-06	0.29046	0.181484	1.30289e-06	0.05025	1.30289e-06	1.30289e-06	0.50147	0.296282	1.30289e-06	0.67202	0.0732631	1.30289e-06
LSP1	0.14185	1.30289e-06	1.30289e-06	0.31529	1.30289e-06	1.30289e-06	0.73669	0.181484	1.30289e-06	0.18671	1.30289e-06	1.30289e-06	0.26607	1.30289e-06	1.30289e-06	0.41424	0.0732631	1.30289e-06
ZNF93	-0.19843	1.30289e-06	1.30289e-06	-0.033165	1.30289e-06	1.30289e-06	0.46032	0.181484	1.30289e-06	0.21393	1.30289e-06	1.30289e-06	0.16747	0.0194803	1.30289e-06	-0.050548	0.026505	1.30289e-06
RP4-736L20.3	0.16508	1.30289e-06	1.30289e-06	0.13936	1.30289e-06	1.30289e-06	0.41606	0.181484	1.30289e-06	-0.047119	1.30289e-06	1.30289e-06	0.54103	0.019384	1.30289e-06	0.32228	0.026505	1.30289e-06
CCNE1	0.22079	1.30289e-06	1.30289e-06	-0.36864	1.30289e-06	1.30289e-06	0.3979	0.181484	1.30289e-06	0.31422	1.30289e-06	1.30289e-06	-0.23786	1.30289e-06	1.30289e-06	0.17335	0.026505	1.30289e-06
ZNF334	0.065117	1.30289e-06	1.30289e-06	0.53359	1.30289e-06	1.30289e-06	0.66152	0.181484	1.30289e-06	0.20569	1.30289e-06	1.30289e-06	0.20276	0.0109125	1.30289e-06	0.19589	0.0203997	1.30289e-06
BEST2	0.29236	1.30289e-06	1.30289e-06	-0.040891	1.30289e-06	1.30289e-06	0.51532	0.181484	1.30289e-06	-0.33944	1.30289e-06	0.188051	0.007014	1.30289e-06	1.30289e-06	0.14695	0.0115298	1.30289e-06
SCAMP3	0.07166	1.30289e-06	1.30289e-06	-0.17775	1.30289e-06	1.30289e-06	0.40254	0.181484	1.30289e-06	-0.033691	1.30289e-06	1.30289e-06	0.34368	0.0194803	1.30289e-06	0.020485	1.30289e-06	1.30289e-06
GAPT	0.002784	1.30289e-06	1.30289e-06	-0.26303	1.30289e-06	1.30289e-06	0.39	0.181484	1.30289e-06	0.2581	1.30289e-06	1.30289e-06	0.38709	0.00705257	1.30289e-06	0.032394	1.30289e-06	1.30289e-06
RP5-1073O3.2	0.053356	1.30289e-06	1.30289e-06	0.020882	1.30289e-06	1.30289e-06	0.77303	0.181484	1.30289e-06	-0.18598	1.30289e-06	1.30289e-06	0.15054	1.30289e-06	1.30289e-06	-0.1039	1.30289e-06	1.30289e-06
AC068831.10	0.19076	1.30289e-06	1.30289e-06	0.13972	1.30289e-06	1.30289e-06	0.34884	0.181484	1.30289e-06	0.1539	1.30289e-06	1.30289e-06	0.076434	1.30289e-06	1.30289e-06	0.10275	1.30289e-06	1.30289e-06
G6PC3	-0.37739	1.30289e-06	1.30289e-06	-0.22386	1.30289e-06	1.30289e-06	0.091769	0.181484	1.30289e-06	-0.42712	1.30289e-06	1.30289e-06	0.0804	1.30289e-06	1.30289e-06	0.13734	1.30289e-06	1.30289e-06
MMD	0.25218	1.30289e-06	1.30289e-06	0.23549	1.30289e-06	1.30289e-06	0.55458	0.181484	1.30289e-06	-0.037863	1.30289e-06	1.30289e-06	0.05685	1.30289e-06	1.30289e-06	0.019282	1.30289e-06	1.30289e-06
IRF1	-0.32336	1.30289e-06	0.331242	-0.58951	1.30289e-06	0.142241	0.48074	0.181484	1.30289e-06	-0.027889	1.30289e-06	1.30289e-06	-0.075678	1.30289e-06	1.30289e-06	-0.047012	1.30289e-06	1.30289e-06
VPS33B	-0.024494	1.30289e-06	1.30289e-06	0.10926	1.30289e-06	1.30289e-06	0.22133	0.181484	1.30289e-06	0.26104	1.30289e-06	1.30289e-06	-0.013266	1.30289e-06	1.30289e-06	-0.053665	1.30289e-06	1.30289e-06
PLEKHO1	0.061262	1.30289e-06	1.30289e-06	-0.23063	1.30289e-06	0.0372179	0.33316	0.181484	1.30289e-06	0.16493	1.30289e-06	1.30289e-06	0.066597	1.30289e-06	1.30289e-06	0.14877	1.30289e-06	1.30289e-06
KIF7	0.025381	1.30289e-06	1.30289e-06	-0.45022	1.30289e-06	1.30289e-06	0.74782	0.170481	1.30289e-06	0.22866	1.30289e-06	1.30289e-06	-0.050195	0.151932	1.30289e-06	0.40741	0.0620009	1.30289e-06
CTD-2659N19.9	0.069433	1.30289e-06	1.30289e-06	0.31717	1.30289e-06	1.30289e-06	0.37127	0.170481	1.30289e-06	-0.019934	1.30289e-06	1.30289e-06	0.31711	0.0682168	1.30289e-06	0.22142	0.0494589	1.30289e-06
RHBDD3	-0.077186	1.30289e-06	1.30289e-06	0.20698	1.30289e-06	1.30289e-06	0.62169	0.170481	1.30289e-06	-0.32377	1.30289e-06	0.235057	0.63843	0.05039	1.30289e-06	-0.021637	1.30289e-06	1.30289e-06
RP11-993B23.3	0.075566	1.30289e-06	0.224106	0.23559	1.30289e-06	0.158263	0.37539	0.170481	0.111505	-0.01914	1.30289e-06	0.180762	-0.032799	1.30289e-06	0.0958646	0.077509	1.30289e-06	0.10035
STAT1	-0.028669	1.30289e-06	1.30289e-06	0.28242	1.30289e-06	1.30289e-06	0.39519	0.170233	1.30289e-06	0.45612	0.305234	1.30289e-06	-0.15473	1.30289e-06	1.30289e-06	-0.26541	1.30289e-06	1.30289e-06
KCNN4	0.44175	1.30289e-06	1.30289e-06	0.41539	1.30289e-06	1.30289e-06	0.55083	0.164406	1.30289e-06	0.17822	0.0290319	1.30289e-06	0.20109	1.30289e-06	1.30289e-06	-0.056924	0.026505	1.30289e-06
CCR2	0.095205	1.30289e-06	1.30289e-06	-0.50963	1.30289e-06	0.0246711	0.73938	0.164406	1.30289e-06	0.19932	1.30289e-06	1.30289e-06	0.17412	1.30289e-06	1.30289e-06	0.38178	0.0389754	1.30289e-06
SNORA31	0.22816	1.30289e-06	1.30289e-06	0.12857	1.30289e-06	1.30289e-06	0.21625	0.161539	1.30289e-06	-0.064625	1.30289e-06	1.30289e-06	-0.20341	1.30289e-06	1.30289e-06	-0.099	1.30289e-06	1.30289e-06
RP1-111D6.2	0.12412	1.30289e-06	1.30289e-06	0.22663	1.30289e-06	1.30289e-06	0.076172	0.15367	1.30289e-06	0.41311	0.362337	1.30289e-06	0.49949	0.0919248	1.30289e-06	0.085252	1.30289e-06	1.30289e-06
CRISPLD1	-0.11486	1.30289e-06	1.30289e-06	0.12691	1.30289e-06	1.30289e-06	0.49331	0.15367	1.30289e-06	-0.20115	1.30289e-06	1.30289e-06	-0.087977	1.30289e-06	1.30289e-06	-0.30421	1.30289e-06	1.30289e-06
NUDT13	-0.22672	1.30289e-06	1.30289e-06	0.055118	1.30289e-06	1.30289e-06	0.45529	0.147048	1.30289e-06	0.48034	0.192234	1.30289e-06	0.18461	1.30289e-06	1.30289e-06	-0.14788	1.30289e-06	1.30289e-06
DESI1	0.25404	1.30289e-06	1.30289e-06	0.22076	1.30289e-06	1.30289e-06	0.22361	0.147048	1.30289e-06	-0.34415	1.30289e-06	0.226466	0.30551	0.138748	1.30289e-06	0.30365	0.0494589	1.30289e-06
PAIP1	-0.025939	1.30289e-06	1.30289e-06	0.14895	1.30289e-06	1.30289e-06	0.44613	0.147048	1.30289e-06	0.091855	1.30289e-06	1.30289e-06	-0.23872	1.30289e-06	1.30289e-06	0.28014	0.026505	1.30289e-06
PPP1R13L	-0.14011	1.30289e-06	1.30289e-06	0.15904	1.30289e-06	1.30289e-06	0.30469	0.138133	1.30289e-06	0.22937	1.30289e-06	1.30289e-06	0.13976	1.30289e-06	1.30289e-06	0.59355	1.07002	1.30289e-06
PSMB9	-0.21559	1.30289e-06	1.30289e-06	-0.088065	1.30289e-06	1.30289e-06	0.74572	0.134192	1.30289e-06	0.30847	1.30289e-06	1.30289e-06	0.51644	0.118833	1.30289e-06	0.83372	0.450498	1.30289e-06
GATAD1	-0.084833	1.30289e-06	1.30289e-06	-0.012539	1.30289e-06	1.30289e-06	0.37328	0.131627	1.30289e-06	0.56415	0.294	1.30289e-06	-0.94848	1.30289e-06	1.38699	-0.2198	1.30289e-06	0.105196
RP11-739N20.2	-0.014235	1.30289e-06	1.30289e-06	-0.13994	1.30289e-06	1.30289e-06	-0.092106	0.117473	1.30289e-06	-0.27129	0.064532	1.30289e-06	0.13319	1.30289e-06	1.30289e-06	0.020972	1.30289e-06	1.30289e-06
GDF9	-0.46624	1.30289e-06	1.30289e-06	-0.27084	1.30289e-06	1.30289e-06	-0.16342	0.117473	1.30289e-06	0.14826	0.0256435	1.30289e-06	0.041398	1.30289e-06	1.30289e-06	-0.012537	1.30289e-06	1.30289e-06
FAM46C	0.0015246	1.30289e-06	1.30289e-06	0.2731	1.30289e-06	1.30289e-06	0.34558	0.102945	1.30289e-06	-0.23549	1.30289e-06	1.30289e-06	0.53879	0.0447333	1.30289e-06	0.13376	0.0494589	1.30289e-06
ADIPOR1	-0.56483	1.30289e-06	0.490149	-0.26764	1.30289e-06	0.268691	0.44282	0.0972348	1.30289e-06	0.20438	0.0581458	1.30289e-06	-0.32193	1.30289e-06	0.123959	-0.028352	1.30289e-06	1.30289e-06
ASTN2	0.2226	1.30289e-06	1.30289e-06	0.29438	1.30289e-06	1.30289e-06	0.21108	0.096802	1.30289e-06	0.26053	0.0842388	1.30289e-06	-0.15162	1.30289e-06	1.30289e-06	-0.51112	1.30289e-06	0.110905
CCDC26	-0.050808	1.30289e-06	1.30289e-06	-0.12137	1.30289e-06	1.30289e-06	0.15108	0.0892225	1.30289e-06	0.22112	1.30289e-06	1.30289e-06	0.33329	1.30289e-06	1.30289e-06	0.32829	1.30289e-06	1.30289e-06
RP11-485M7.3	0.16199	1.30289e-06	1.30289e-06	0.066307	1.30289e-06	1.30289e-06	0.43619	0.0887374	1.30289e-06	0.30693	1.30289e-06	1.30289e-06	0.087245	1.30289e-06	1.30289e-06	0.064041	1.30289e-06	1.30289e-06
HELQ	0.11044	1.30289e-06	1.30289e-06	0.13344	1.30289e-06	1.30289e-06	0.12479	0.0829106	1.30289e-06	0.94882	0.205905	1.30289e-06	-0.030382	1.30289e-06	1.30289e-06	0.32537	0.026505	1.30289e-06
ANKIB1	0.061867	1.30289e-06	1.30289e-06	-0.31662	1.30289e-06	0.155977	0.35717	0.0829106	1.30289e-06	0.40318	0.182916	1.30289e-06	0.41438	0.0194803	1.30289e-06	0.64812	0.246179	1.30289e-06
KB-1507C5.2	0.14796	1.30289e-06	1.30289e-06	0.063128	1.30289e-06	1.30289e-06	0.41619	0.0812506	1.30289e-06	0.60391	0.223531	1.30289e-06	0.4709	0.272599	1.30289e-06	0.36512	0.0630512	1.30289e-06
KIF9-AS1	-0.021952	1.30289e-06	1.30289e-06	-0.010443	1.30289e-06	1.30289e-06	0.40798	0.0812506	1.30289e-06	0.33264	0.142862	1.30289e-06	0.47763	0.167561	1.30289e-06	0.18291	1.30289e-06	1.30289e-06
AC068580.1	0.17434	1.30289e-06	1.30289e-06	-0.15971	1.30289e-06	1.30289e-06	0.47814	0.0812506	1.30289e-06	0.41737	1.30289e-06	1.30289e-06	0.066292	0.0718972	1.30289e-06	0.68908	0.185662	1.30289e-06
KLF4	0.09209	1.30289e-06	1.30289e-06	-0.18724	1.30289e-06	1.30289e-06	0.2068	0.0812506	1.30289e-06	0.052583	1.30289e-06	1.30289e-06	0.56622	0.527381	1.30289e-06	0.58826	0.143507	1.30289e-06
ELK3	-0.11217	1.30289e-06	1.30289e-06	-1.3369	1.30289e-06	2.26728	0.29031	0.0812506	1.30289e-06	0.0018274	1.30289e-06	1.30289e-06	0.093611	1.30289e-06	1.30289e-06	0.068252	0.0474017	1.30289e-06
CORO7	0.10954	1.30289e-06	1.30289e-06	0.15669	1.30289e-06	1.30289e-06	0.57398	0.0812506	1.30289e-06	-0.59405	1.30289e-06	1.04451	0.21395	0.145425	1.30289e-06	0.23956	0.026505	1.30289e-06
JUNB	-0.99552	1.30289e-06	0.203727	-0.58613	1.30289e-06	0.133937	0.28719	0.0812506	1.30289e-06	-0.39227	1.30289e-06	0.229135	0.69999	0.0918411	1.30289e-06	0.060522	1.30289e-06	1.30289e-06
FRY	0.19431	1.30289e-06	1.30289e-06	-0.12016	1.30289e-06	1.30289e-06	0.48137	0.0812506	1.30289e-06	0.3368	1.30289e-06	1.30289e-06	0.0045226	1.30289e-06	1.30289e-06	0.05923	1.30289e-06	1.30289e-06
AC138430.4	0.15513	1.30289e-06	1.30289e-06	-0.0013285	1.30289e-06	1.30289e-06	0.40923	0.0811046	1.30289e-06	-0.75101	1.30289e-06	0.209779	-0.21632	1.30289e-06	1.30289e-06	-0.26673	1.30289e-06	1.30289e-06
MASP2	-0.18661	1.30289e-06	1.30289e-06	-0.45878	1.30289e-06	1.30289e-06	0.52972	0.0780639	1.30289e-06	-0.10063	1.30289e-06	1.30289e-06	0.32661	0.0194803	1.30289e-06	0.30186	0.026505	1.30289e-06
RP11-73M18.7	0.023833	1.30289e-06	1.30289e-06	-0.047797	1.30289e-06	1.30289e-06	0.61871	0.0771661	1.30289e-06	0.13641	1.30289e-06	1.30289e-06	0.099599	1.30289e-06	1.30289e-06	-0.095567	1.30289e-06	1.30289e-06
EPB41L5	-0.19536	1.30289e-06	1.30289e-06	-0.0021502	1.30289e-06	1.30289e-06	0.29804	0.0738053	1.30289e-06	0.35701	0.375261	1.30289e-06	0.47423	0.19962	1.30289e-06	-0.079805	0.0115298	1.30289e-06
SOX13	0.28978	1.30289e-06	1.30289e-06	0.075224	1.30289e-06	1.30289e-06	0.32378	0.0738053	1.30289e-06	0.24442	0.0173046	1.30289e-06	0.26394	0.167561	1.30289e-06	0.49437	0.201685	1.30289e-06
IPO9-AS1	0.17503	1.30289e-06	1.30289e-06	-0.11336	1.30289e-06	1.30289e-06	0.51186	0.0726358	1.30289e-06	0.6167	0.294556	1.30289e-06	0.40259	0.0194803	1.30289e-06	0.33031	0.026505	1.30289e-06
SUB1	-0.0059248	1.30289e-06	1.30289e-06	-0.29664	1.30289e-06	1.30289e-06	0.13998	0.0726358	1.30289e-06	0.46592	0.0936493	1.30289e-06	0.18659	1.30289e-06	1.30289e-06	-0.12106	1.30289e-06	1.30289e-06
CTB-161K23.1	-0.1817	1.30289e-06	1.30289e-06	0.12795	1.30289e-06	1.30289e-06	0.32108	0.0726358	1.30289e-06	0.3652	0.0484342	1.30289e-06	0.22019	1.30289e-06	1.30289e-06	0.57318	0.675769	1.30289e-06
PON2	-0.11027	1.30289e-06	1.30289e-06	0.16632	1.30289e-06	1.30289e-06	0.32669	0.0726358	1.30289e-06	0.029964	1.30289e-06	1.30289e-06	0.47425	0.0464491	1.30289e-06	0.38541	0.143507	1.30289e-06
INF2	0.098056	1.30289e-06	1.30289e-06	-0.33186	1.30289e-06	1.30289e-06	0.029706	0.0726358	1.30289e-06	0.080622	1.30289e-06	1.30289e-06	0.59474	0.262304	1.30289e-06	0.35753	0.026505	1.30289e-06
CTD-3216D2.5	0.036796	1.30289e-06	1.30289e-06	0.11787	1.30289e-06	1.30289e-06	0.32088	0.0726358	1.30289e-06	-0.79987	1.30289e-06	0.253911	0.29216	1.30289e-06	1.30289e-06	0.16151	0.00790045	1.30289e-06
LURAP1	-0.1241	1.30289e-06	1.30289e-06	0.10863	1.30289e-06	1.30289e-06	0.75849	0.0726358	1.30289e-06	0.040357	1.30289e-06	1.30289e-06	0.43223	1.30289e-06	1.30289e-06	0.44387	0.00051364	1.30289e-06
FURIN	-0.8454	1.30289e-06	0.898363	-0.88986	1.30289e-06	0.577213	-0.10565	0.0726358	1.30289e-06	-0.49409	1.30289e-06	0.92384	-1.1888	1.30289e-06	1.04646	-1.1692	1.30289e-06	1.23845
GABPB1-AS1	-0.096849	1.30289e-06	1.30289e-06	0.32067	1.30289e-06	1.30289e-06	0.11639	0.0726358	1.30289e-06	0.25408	1.30289e-06	1.30289e-06	0.053038	1.30289e-06	1.30289e-06	-0.026271	1.30289e-06	1.30289e-06
BAIAP2L2	0.084927	1.30289e-06	1.30289e-06	-0.021738	1.30289e-06	1.30289e-06	0.36191	0.0726358	1.30289e-06	-0.022069	1.30289e-06	1.30289e-06	0.039226	1.30289e-06	1.30289e-06	-0.074125	1.30289e-06	1.30289e-06
IER2	-0.10926	1.30289e-06	1.30289e-06	-0.26387	1.30289e-06	1.30289e-06	0.44623	0.0726358	1.30289e-06	-0.065641	1.30289e-06	1.30289e-06	0.023014	1.30289e-06	1.30289e-06	-0.064286	1.30289e-06	1.30289e-06
MRPL23-AS1	0.26517	1.30289e-06	1.30289e-06	-0.11739	1.30289e-06	1.30289e-06	0.52461	0.0652062	1.30289e-06	0.45189	0.00882445	1.30289e-06	0.14844	1.30289e-06	1.30289e-06	0.017498	0.0193259	1.30289e-06
ZBTB2	0.031905	1.30289e-06	1.30289e-06	-0.056497	1.30289e-06	1.30289e-06	0.19584	0.0652062	1.30289e-06	-0.32247	1.30289e-06	0.539481	-0.73623	1.30289e-06	1.25845	-0.38604	1.30289e-06	0.699881
NR2F6	-0.54468	1.30289e-06	1.30289e-06	-0.36663	1.30289e-06	1.30289e-06	-0.13028	0.0652062	1.30289e-06	-0.76805	1.30289e-06	1.51025	-0.48138	1.30289e-06	1.30289e-06	0.23231	1.30289e-06	1.30289e-06
RP11-150O12.4	0.098104	1.30289e-06	1.30289e-06	-0.10798	1.30289e-06	1.30289e-06	0.21748	0.0625649	1.30289e-06	0.53149	0.385959	1.30289e-06	0.40946	0.383128	1.30289e-06	0.41526	0.0732631	1.30289e-06
RP11-213H15.1	-0.019253	1.30289e-06	1.30289e-06	-0.16579	1.30289e-06	1.30289e-06	0.55171	0.0625649	1.30289e-06	0.17177	0.0873933	1.30289e-06	-0.09962	1.30289e-06	1.30289e-06	0.017602	1.30289e-06	1.30289e-06
DUSP4	0.019118	1.30289e-06	1.30289e-06	-0.34462	1.30289e-06	1.30289e-06	0.089017	0.0614888	1.30289e-06	0.37786	0.304615	1.30289e-06	0.23529	0.00705257	1.30289e-06	0.056489	1.30289e-06	1.30289e-06
KRIT1	0.16206	1.30289e-06	1.30289e-06	-0.13028	1.30289e-06	1.30289e-06	0.0075916	0.0611732	1.30289e-06	0.070542	1.30289e-06	1.30289e-06	-0.10745	1.30289e-06	1.30289e-06	-0.23291	1.30289e-06	1.30289e-06
CASP10	-0.014895	1.30289e-06	1.30289e-06	-0.38906	1.30289e-06	1.30289e-06	0.19467	0.0566777	1.30289e-06	0.43646	0.134023	1.30289e-06	0.15002	1.30289e-06	1.30289e-06	0.20563	0.026505	1.30289e-06
RP11-245J9.6	0.31652	1.30289e-06	1.30289e-06	-0.031983	1.30289e-06	1.30289e-06	0.25958	0.0547974	1.30289e-06	0.062138	1.30289e-06	1.30289e-06	-0.0011859	1.30289e-06	1.30289e-06	0.27172	1.30289e-06	1.30289e-06
BDH2	0.012596	1.30289e-06	1.30289e-06	0.13759	1.30289e-06	1.30289e-06	0.18738	0.0544605	1.30289e-06	0.068776	1.30289e-06	1.30289e-06	0.28386	1.30289e-06	1.30289e-06	0.19941	0.0164662	1.30289e-06
IGSF21	0.08186	1.30289e-06	1.30289e-06	0.20457	1.30289e-06	1.30289e-06	0.35213	0.0518179	1.30289e-06	0.29743	0.385298	1.30289e-06	0.08081	1.30289e-06	1.30289e-06	0.68661	0.570687	1.30289e-06
ALX1	0.31234	1.30289e-06	1.30289e-06	0.17174	1.30289e-06	1.30289e-06	0.44684	0.0518179	1.30289e-06	0.01614	1.30289e-06	1.30289e-06	0.13109	1.30289e-06	1.30289e-06	0.7504	0.164868	1.30289e-06
CDK4	-0.57241	1.30289e-06	0.137356	-0.99175	1.30289e-06	1.22045	0.32061	0.0518179	1.30289e-06	-0.23139	1.30289e-06	1.30289e-06	-0.45998	1.30289e-06	1.12033	-0.44844	1.30289e-06	0.2066
TSPAN19	-0.098437	1.30289e-06	1.30289e-06	-0.35081	1.30289e-06	1.30289e-06	0.07535	0.0401895	1.30289e-06	0.31613	0.0448113	1.30289e-06	-0.13712	1.30289e-06	1.30289e-06	0.4335	0.026505	1.30289e-06
TAP1	0.15316	1.30289e-06	1.30289e-06	0.19516	1.30289e-06	1.30289e-06	0.3828	0.0401895	1.30289e-06	0.19585	1.30289e-06	1.30289e-06	0.71571	0.168661	1.30289e-06	0.7874	0.265713	1.30289e-06
MIR3175	0.059164	1.30289e-06	1.30289e-06	-0.041516	1.30289e-06	1.30289e-06	0.42596	0.0388624	1.30289e-06	0.3721	0.0326519	1.30289e-06	0.56721	0.239091	1.30289e-06	0.50219	0.0630512	1.30289e-06
CTC-459F4.1	-0.091709	1.30289e-06	1.30289e-06	-0.11336	1.30289e-06	1.30289e-06	0.33649	0.0388624	1.30289e-06	0.19846	1.30289e-06	1.30289e-06	-0.50379	1.30289e-06	0.298224	0.080138	1.30289e-06	1.30289e-06
RP11-457M11.5	-0.2464	1.30289e-06	1.30289e-06	0.37259	1.30289e-06	1.30289e-06	0.34671	0.0348388	1.30289e-06	-0.28479	1.30289e-06	1.30289e-06	0.32945	1.30289e-06	1.30289e-06	0.69602	0.352721	1.30289e-06
METAP2	-1.4334	1.30289e-06	2.86614	-1.8395	1.30289e-06	2.85824	0.23321	0.0348388	1.30289e-06	-2.784	1.30289e-06	2.4603	-1.6867	1.30289e-06	2.83209	-1.7742	1.30289e-06	2.78252
FAR2	-0.15711	1.30289e-06	1.30289e-06	-0.21774	1.30289e-06	1.30289e-06	0.42924	0.0342552	1.30289e-06	0.29487	0.318562	1.30289e-06	0.13723	1.30289e-06	1.30289e-06	0.19359	1.30289e-06	1.30289e-06
AL450992.2	-0.077796	1.30289e-06	1.30289e-06	-0.59395	1.30289e-06	0.0421931	0.10948	0.0313714	1.30289e-06	-0.38326	0.365303	0.00208745	-0.2671	1.30289e-06	0.22452	0.047257	1.30289e-06	1.30289e-06
ADCY3	-0.097474	1.30289e-06	1.30289e-06	-0.064231	1.30289e-06	1.30289e-06	0.33312	0.0313714	1.30289e-06	0.53038	0.313379	1.30289e-06	0.81098	0.0965698	1.30289e-06	0.3323	0.164868	1.30289e-06
C21orf91	0.29444	1.30289e-06	1.30289e-06	0.22881	1.30289e-06	1.30289e-06	0.44405	0.0313714	1.30289e-06	0.40004	1.30289e-06	1.30289e-06	0.39764	0.200644	1.30289e-06	0.40645	0.026505	1.30289e-06
MTERF1	-0.14883	1.30289e-06	1.30289e-06	-0.067699	1.30289e-06	1.30289e-06	0.31023	0.0313714	1.30289e-06	0.12624	1.30289e-06	1.30289e-06	0.040721	1.30289e-06	1.30289e-06	0.24489	0.0115298	1.30289e-06
SLC27A1	0.15386	1.30289e-06	1.30289e-06	-0.0018684	1.30289e-06	1.30289e-06	0.2944	0.0313714	1.30289e-06	-0.49475	1.30289e-06	1.30289e-06	0.4733	0.0682168	1.30289e-06	0.19133	1.30289e-06	1.30289e-06
ITPK1	0.20714	1.30289e-06	1.30289e-06	0.072984	1.30289e-06	1.30289e-06	0.48802	0.0313714	1.30289e-06	-0.27957	1.30289e-06	1.30289e-06	0.22886	0.00133359	1.30289e-06	0.061258	1.30289e-06	1.30289e-06
RP11-105N13.4	-0.3797	1.30289e-06	1.30289e-06	0.20616	1.30289e-06	1.30289e-06	-0.51374	0.0313714	0.294103	0.16432	1.30289e-06	1.30289e-06	0.17109	1.30289e-06	1.30289e-06	-0.33388	1.30289e-06	0.153399
AHRR	-0.028279	1.30289e-06	1.30289e-06	0.17625	1.30289e-06	1.30289e-06	0.34603	0.0313714	1.30289e-06	-0.0072572	1.30289e-06	1.30289e-06	0.17421	1.30289e-06	1.30289e-06	-0.021194	1.30289e-06	1.30289e-06
RP11-116D17.1	-0.48502	1.30289e-06	0.0719782	-0.10627	1.30289e-06	1.30289e-06	-0.2909	0.0311632	1.30289e-06	-0.26126	1.30289e-06	1.30289e-06	-0.06557	1.30289e-06	1.30289e-06	-0.33841	1.30289e-06	0.1359
RUSC1-AS1	0.047954	1.30289e-06	1.30289e-06	-0.082841	1.30289e-06	1.30289e-06	0.3046	0.0311632	1.30289e-06	-0.36439	1.30289e-06	0.359618	0.083211	1.30289e-06	1.30289e-06	0.0525	1.30289e-06	1.30289e-06
LRRN2	-0.058214	1.30289e-06	1.30289e-06	-0.054907	1.30289e-06	1.30289e-06	0.41203	0.0302268	1.30289e-06	-0.10558	1.30289e-06	1.30289e-06	0.31469	0.00602355	1.30289e-06	0.33769	0.026505	1.30289e-06
GATAD2A	-0.44796	1.30289e-06	1.23434	-0.32173	1.30289e-06	1.30289e-06	-0.35955	0.0301966	1.30289e-06	-0.89164	1.30289e-06	1.63041	0.057078	1.30289e-06	1.30289e-06	-0.58966	1.30289e-06	0.624988
TRAK2	-0.15781	1.30289e-06	1.30289e-06	-0.063905	1.30289e-06	1.30289e-06	0.39161	0.027457	1.30289e-06	0.50024	0.280495	1.30289e-06	0.12313	1.30289e-06	1.30289e-06	0.47504	0.0389754	1.30289e-06
TRIM4	0.13372	1.30289e-06	1.30289e-06	0.25835	1.30289e-06	1.30289e-06	0.10664	0.027457	1.30289e-06	0.21135	1.30289e-06	1.30289e-06	0.13747	1.30289e-06	1.30289e-06	0.31524	0.0732631	1.30289e-06
AC007096.1	0.12622	1.30289e-06	0.775019	0.077812	1.30289e-06	0.727017	0.48722	0.027457	1.16754	-0.16511	1.30289e-06	1.05499	-0.25179	1.30289e-06	0.861053	-0.53653	1.30289e-06	0.793528
MAP1LC3A	0.15596	1.30289e-06	1.30289e-06	-0.29864	1.30289e-06	1.30289e-06	0.32455	0.027457	1.30289e-06	-0.97125	1.30289e-06	1.25912	-0.41731	1.30289e-06	1.30289e-06	-0.24598	1.30289e-06	1.30289e-06
RP11-266N13.2	0.13024	1.30289e-06	1.30289e-06	-0.26132	1.30289e-06	1.30289e-06	0.306	0.027457	1.30289e-06	0.095479	1.30289e-06	1.30289e-06	0.038023	1.30289e-06	1.30289e-06	-0.15334	1.30289e-06	1.30289e-06
NBPF12	0.023383	1.30289e-06	1.30289e-06	0.072377	1.30289e-06	1.30289e-06	-0.48227	0.0273145	1.30289e-06	0.3803	0.224991	1.30289e-06	0.39497	0.00705257	1.30289e-06	-0.47089	1.30289e-06	1.30289e-06
RNA5SP74	-0.027171	1.30289e-06	0.278134	-0.53554	1.30289e-06	0.395999	-0.47211	0.0259288	0.552179	-1.5957	1.30289e-06	0.610186	-0.25638	1.30289e-06	0.580353	-1.0236	1.30289e-06	0.603911
PBRM1	-0.93589	1.30289e-06	0.224106	-0.47087	1.30289e-06	1.30289e-06	-0.19363	0.0249903	1.30289e-06	0.20429	1.30289e-06	1.30289e-06	-0.47201	1.30289e-06	0.04931	-0.41228	1.30289e-06	0.0148368
LNP1	-0.033987	1.30289e-06	1.30289e-06	-0.36508	1.30289e-06	1.30289e-06	0.32511	0.0237996	1.30289e-06	0.71837	1.0231	1.30289e-06	0.029281	1.30289e-06	1.30289e-06	0.040699	1.30289e-06	1.30289e-06
EXO1	0.061873	1.30289e-06	1.30289e-06	0.0020136	1.30289e-06	1.30289e-06	0.18761	0.0232663	1.30289e-06	0.40778	0.0484342	1.30289e-06	0.218	1.30289e-06	1.30289e-06	-0.060267	1.30289e-06	1.30289e-06
TACC2	0.19439	1.30289e-06	1.30289e-06	0.26015	1.30289e-06	1.30289e-06	0.39181	0.0198284	1.30289e-06	0.58256	0.261415	1.30289e-06	0.79714	0.358374	1.30289e-06	0.051443	1.30289e-06	1.30289e-06
OR2A20P	-0.3048	1.30289e-06	0.240756	0.1836	1.30289e-06	1.30289e-06	0.46505	0.0198016	1.30289e-06	0.54201	0.327224	1.30289e-06	0.28063	0.00705257	1.30289e-06	0.15219	0.0203997	1.30289e-06
TOP2B	-0.24622	1.30289e-06	1.30289e-06	-1.1995	1.30289e-06	1.01428	0.31215	0.0198016	1.30289e-06	0.39625	0.0277643	1.30289e-06	-0.72361	1.30289e-06	0.768671	-0.80583	1.30289e-06	0.618715
TRIM32	0.37214	1.30289e-06	1.30289e-06	0.47297	1.30289e-06	1.30289e-06	0.37827	0.0187347	1.30289e-06	0.21245	1.30289e-06	1.30289e-06	0.3236	0.149805	1.30289e-06	0.00034527	1.30289e-06	1.30289e-06
FBXO16	0.20522	1.30289e-06	1.30289e-06	-0.099289	1.30289e-06	1.30289e-06	0.061053	0.0149397	1.30289e-06	0.47664	0.289472	1.30289e-06	0.23802	1.30289e-06	1.30289e-06	0.33753	0.213551	1.30289e-06
ZNF230	-0.049536	1.30289e-06	1.30289e-06	-0.55614	1.30289e-06	0.184865	0.28917	0.0141915	1.30289e-06	0.21105	1.30289e-06	1.30289e-06	0.0072654	1.30289e-06	1.30289e-06	0.25993	0.0681589	1.30289e-06
TMEM161A	-0.50962	1.30289e-06	0.0613492	0.31219	1.30289e-06	1.30289e-06	0.27564	0.013795	1.30289e-06	-0.82223	1.30289e-06	0.643634	-0.093883	1.30289e-06	1.30289e-06	-0.05068	1.30289e-06	1.30289e-06
VCAN	-0.25382	1.30289e-06	0.798122	-0.55189	1.30289e-06	0.133937	0.15715	0.0130327	1.30289e-06	0.29344	1.30289e-06	1.30289e-06	-0.058911	1.30289e-06	1.30289e-06	-0.27325	1.30289e-06	0.00234194
RP11-14D22.2	-0.095756	1.30289e-06	1.30289e-06	-0.1151	1.30289e-06	1.30289e-06	0.19161	0.0102548	1.30289e-06	0.56014	0.0873933	1.30289e-06	1.0179	0.59107	1.30289e-06	0.58537	0.185493	1.30289e-06
RNU6-351P	-1.2409	1.30289e-06	1.08448	-0.8748	1.30289e-06	1.04528	-0.73715	0.0102548	1.16754	-1.7577	1.30289e-06	1.52809	-0.70559	1.30289e-06	0.855731	-0.68272	1.30289e-06	1.0659
COMMD3-BMI1	0.20307	1.30289e-06	1.30289e-06	0.34707	1.30289e-06	1.30289e-06	-1.1034	0.0102548	0.123891	0.028112	1.30289e-06	1.30289e-06	-0.27156	1.30289e-06	1.30289e-06	-0.13945	1.30289e-06	1.30289e-06
TAX1BP1	0.34094	1.30289e-06	1.30289e-06	0.090827	1.30289e-06	1.30289e-06	0.44301	0.00954082	1.30289e-06	0.48958	0.147502	1.30289e-06	0.39626	1.30289e-06	1.30289e-06	0.21584	1.30289e-06	1.30289e-06
RP4-533D7.4	0.05822	1.30289e-06	1.30289e-06	-0.031043	1.30289e-06	1.30289e-06	0.4196	0.00931891	1.30289e-06	0.0011985	1.30289e-06	1.30289e-06	0.37132	1.30289e-06	1.30289e-06	0.38427	0.120972	1.30289e-06
TBC1D1	0.24849	1.30289e-06	1.30289e-06	0.28384	1.30289e-06	1.30289e-06	0.27562	0.00894989	1.30289e-06	0.094368	1.30289e-06	1.30289e-06	0.35641	0.180864	1.30289e-06	0.12622	1.30289e-06	1.30289e-06
ZNF165	0.36411	1.30289e-06	1.30289e-06	0.23112	1.30289e-06	1.30289e-06	0.3665	0.00868973	1.30289e-06	0.36236	0.0873933	1.30289e-06	0.56964	0.171613	1.30289e-06	0.50827	0.143507	1.30289e-06
CTB-181H17.1	-0.21769	1.30289e-06	1.30289e-06	0.12655	1.30289e-06	1.30289e-06	0.16322	0.00868973	1.30289e-06	0.11589	1.30289e-06	1.30289e-06	0.26504	1.30289e-06	1.30289e-06	0.68144	0.334813	1.30289e-06
RETREG3	-0.080486	1.30289e-06	1.30289e-06	0.044021	1.30289e-06	1.30289e-06	0.19828	0.00868973	1.30289e-06	0.17241	1.30289e-06	1.30289e-06	0.090294	1.30289e-06	1.30289e-06	0.63671	0.132153	1.30289e-06
CD2	-0.41932	1.30289e-06	0.76972	-0.05519	1.30289e-06	1.30289e-06	0.13066	0.00868973	1.30289e-06	-0.24249	1.30289e-06	0.229376	-0.28977	1.30289e-06	1.30289e-06	0.068229	1.30289e-06	1.30289e-06
MMP24	-0.10618	1.30289e-06	1.30289e-06	-0.011222	1.30289e-06	1.30289e-06	0.3522	0.00868973	1.30289e-06	-1.3054	1.30289e-06	1.0758	0.076875	1.30289e-06	1.30289e-06	0.049913	1.30289e-06	1.30289e-06
SLC22A5	-0.53044	1.30289e-06	0.574119	-0.38828	1.30289e-06	0.476038	0.24365	0.008676	1.30289e-06	-0.33239	1.30289e-06	1.30289e-06	0.0021511	1.30289e-06	1.30289e-06	-0.18633	1.30289e-06	1.30289e-06
ARID2	-0.466	1.30289e-06	0.145897	-0.29725	1.30289e-06	0.0372179	0.35123	0.00814156	1.30289e-06	0.51012	0.147502	1.30289e-06	-0.62908	1.30289e-06	0.484316	-0.33422	1.30289e-06	0.500324
SLC6A15	0.015546	1.30289e-06	1.30289e-06	-0.088515	1.30289e-06	1.30289e-06	0.19885	0.00814156	1.30289e-06	0.53975	0.112326	1.30289e-06	0.49972	0.118833	1.30289e-06	0.065657	1.30289e-06	1.30289e-06
C11orf68	0.072988	1.30289e-06	1.30289e-06	0.10183	1.30289e-06	1.30289e-06	0.048883	0.00814156	1.30289e-06	-0.069334	1.30289e-06	1.30289e-06	-0.055647	1.30289e-06	1.30289e-06	0.73149	0.112443	1.30289e-06
MOAP1	0.32983	1.30289e-06	1.30289e-06	0.31372	1.30289e-06	1.30289e-06	0.4556	0.00814156	1.30289e-06	0.12125	1.30289e-06	1.30289e-06	0.22818	1.30289e-06	1.30289e-06	0.10958	0.026505	1.30289e-06
RP11-353N14.1	0.028894	1.30289e-06	1.30289e-06	0.21179	1.30289e-06	1.30289e-06	0.26852	0.00814156	1.30289e-06	-0.27925	1.30289e-06	1.30289e-06	0.24419	0.00898403	1.30289e-06	0.11679	1.30289e-06	1.30289e-06
PRC1-AS1	0.20391	1.30289e-06	1.30289e-06	0.056818	1.30289e-06	1.30289e-06	0.0046822	0.00814156	1.30289e-06	-0.17814	1.30289e-06	1.30289e-06	-0.053774	1.30289e-06	1.30289e-06	-0.13965	1.30289e-06	0.117909
MICALL1	0.033862	1.30289e-06	1.30289e-06	0.36232	1.30289e-06	1.30289e-06	0.18764	0.00814156	1.30289e-06	-0.32713	1.30289e-06	1.30289e-06	0.0051647	1.30289e-06	1.30289e-06	0.13044	1.30289e-06	1.30289e-06
HRAS	0.033771	1.30289e-06	1.30289e-06	0.094635	1.30289e-06	1.30289e-06	0.19269	0.00767142	1.30289e-06	0.25752	0.284812	1.30289e-06	-0.2343	1.30289e-06	1.30289e-06	0.35963	0.0732631	1.30289e-06
FES	0.23038	1.30289e-06	1.30289e-06	0.044574	1.30289e-06	1.30289e-06	0.18893	0.00767142	1.30289e-06	-0.035174	0.0136422	1.30289e-06	0.063793	1.30289e-06	1.30289e-06	-0.21741	1.30289e-06	1.30289e-06
RP11-245J9.4	-0.11335	1.30289e-06	1.30289e-06	0.03817	1.30289e-06	1.30289e-06	0.18962	0.00767142	1.30289e-06	0.094765	1.30289e-06	1.30289e-06	-0.048	1.30289e-06	1.30289e-06	0.58405	0.0723125	1.30289e-06
RP11-89K10.1	0.010349	1.30289e-06	1.30289e-06	-0.076204	1.30289e-06	1.30289e-06	0.3236	0.00727465	1.30289e-06	0.60078	0.304615	1.30289e-06	0.057349	1.30289e-06	1.30289e-06	0.37817	0.128162	1.30289e-06
MTX1	-0.64484	1.30289e-06	0.778656	-0.49526	1.30289e-06	1.30289e-06	-0.29683	0.00534637	1.30289e-06	-0.6455	1.30289e-06	0.0705382	-0.12681	1.30289e-06	1.30289e-06	0.18912	0.00645444	1.30289e-06
ARHGAP32	0.10144	1.30289e-06	1.30289e-06	-0.15893	1.30289e-06	1.30289e-06	0.18425	0.00534637	1.30289e-06	0.028899	1.30289e-06	1.30289e-06	0.55649	0.2494	1.30289e-06	-0.20637	1.30289e-06	0.253228
PEX1	-0.055907	1.30289e-06	1.30289e-06	-0.21146	1.30289e-06	1.30289e-06	0.32994	0.00505101	1.30289e-06	-0.15945	1.30289e-06	1.30289e-06	-0.1198	1.30289e-06	1.30289e-06	0.555	0.164868	1.30289e-06
MAP3K1	0.010437	1.30289e-06	1.30289e-06	0.23985	1.30289e-06	1.30289e-06	0.39491	0.00505101	1.30289e-06	-0.044781	1.30289e-06	1.30289e-06	0.44497	1.30289e-06	1.30289e-06	-0.20054	1.30289e-06	1.30289e-06
NR2F1-AS1	-0.10506	1.30289e-06	1.30289e-06	0.47198	1.30289e-06	1.30289e-06	-0.050963	0.00385886	1.30289e-06	0.66649	0.158862	1.30289e-06	0.23688	1.30289e-06	1.30289e-06	0.21851	0.026505	1.30289e-06
ERGIC2	0.15202	1.30289e-06	1.30289e-06	0.073421	1.30289e-06	1.30289e-06	0.15338	0.00385886	1.30289e-06	0.40874	0.112062	1.30289e-06	0.12767	1.30289e-06	1.30289e-06	-0.10693	1.30289e-06	1.30289e-06
CASD1	0.33193	1.30289e-06	1.30289e-06	0.17017	1.30289e-06	1.30289e-06	0.18572	0.00207785	1.30289e-06	0.53824	0.209777	1.30289e-06	0.21022	1.30289e-06	1.30289e-06	0.45756	0.0626542	1.30289e-06
TNPO2	-0.75054	1.30289e-06	0.0847052	-0.1485	1.30289e-06	1.30289e-06	0.16156	0.00192645	1.30289e-06	0.032468	1.30289e-06	1.30289e-06	0.42003	0.00713159	1.30289e-06	0.49486	0.026505	1.30289e-06
LRRC37A2	-1.1929	1.30289e-06	0.463014	-0.28371	1.30289e-06	1.30289e-06	-1.0279	0.00140373	0.864432	-1.2231	1.30289e-06	0.331187	0.17543	1.30289e-06	1.30289e-06	-0.37083	1.30289e-06	0.0206497
ZFPM2	0.078247	1.30289e-06	1.30289e-06	0.094088	1.30289e-06	1.30289e-06	0.23	0.00102571	1.30289e-06	0.4124	0.374675	1.30289e-06	0.27139	0.171613	1.30289e-06	-0.081183	1.30289e-06	1.30289e-06
JOSD1	0.0089023	1.30289e-06	1.30289e-06	-0.13676	1.30289e-06	1.30289e-06	0.24855	0.000732403	1.30289e-06	-0.30866	1.30289e-06	0.250814	0.14045	0.0972201	1.30289e-06	-0.027112	1.30289e-06	1.30289e-06
RP11-174G6.5	0.26652	1.30289e-06	1.30289e-06	0.20353	1.30289e-06	1.30289e-06	0.17112	0.000335839	1.30289e-06	0.24632	0.00634998	1.30289e-06	-0.014992	1.30289e-06	1.30289e-06	0.019929	1.30289e-06	1.30289e-06
MIR640	0.11432	1.30289e-06	1.30289e-06	0.1458	1.30289e-06	1.30289e-06	0.28013	0.000328016	1.30289e-06	-0.063655	1.30289e-06	1.30289e-06	0.48179	0.167561	1.30289e-06	0.07985	1.30289e-06	1.30289e-06
AC015933.2	0.09175	1.30289e-06	1.30289e-06	0.14648	1.30289e-06	1.30289e-06	0.14631	9.2949e-05	1.30289e-06	0.41285	0.310107	1.30289e-06	0.15448	1.30289e-06	1.30289e-06	0.70206	0.26753	1.30289e-06
STXBP4	-0.091661	1.30289e-06	1.30289e-06	0.25981	1.30289e-06	1.30289e-06	0.12118	1.30289e-06	1.30289e-06	0.6337	0.584875	1.30289e-06	0.13275	0.00831771	1.30289e-06	0.37095	1.30289e-06	1.30289e-06
GRHL2	-0.16529	1.30289e-06	0.0202145	0.17558	1.30289e-06	1.30289e-06	-0.088063	1.30289e-06	1.30289e-06	0.63611	0.482391	1.30289e-06	-0.14424	1.30289e-06	1.30289e-06	0.41376	0.349954	1.30289e-06
ALS2CR12	0.22317	1.30289e-06	1.30289e-06	0.31274	1.30289e-06	1.30289e-06	0.23746	1.30289e-06	1.30289e-06	0.51665	0.482391	1.30289e-06	0.22472	1.30289e-06	1.30289e-06	0.34206	0.138966	1.30289e-06
RP11-26L20.4	0.088381	1.30289e-06	1.30289e-06	0.24206	1.30289e-06	1.30289e-06	0.19362	1.30289e-06	1.30289e-06	0.86549	0.482391	1.30289e-06	0.27133	0.0194803	1.30289e-06	0.73396	0.0380135	1.30289e-06
UBLCP1	-0.20025	1.30289e-06	1.30289e-06	-0.32226	1.30289e-06	1.30289e-06	0.15245	1.30289e-06	1.30289e-06	0.46487	0.436898	1.30289e-06	0.25165	0.00705257	1.30289e-06	0.31387	0.0732631	1.30289e-06
RP11-62L18.3	0.12055	1.30289e-06	1.30289e-06	-0.292	1.30289e-06	1.30289e-06	0.065824	1.30289e-06	1.30289e-06	0.51594	0.436898	1.30289e-06	0.076056	1.30289e-06	1.30289e-06	0.36747	0.025288	1.30289e-06
TMEM45A	0.095521	1.30289e-06	1.30289e-06	0.24028	1.30289e-06	1.30289e-06	0.093	1.30289e-06	1.30289e-06	0.58358	0.436898	1.30289e-06	0.2663	0.000675854	1.30289e-06	0.24887	1.30289e-06	1.30289e-06
ZHX1	-0.18611	1.30289e-06	0.0284927	0.12102	1.30289e-06	1.30289e-06	0.27692	1.30289e-06	1.30289e-06	0.50775	0.397627	1.30289e-06	-0.028132	1.30289e-06	1.30289e-06	0.054324	1.30289e-06	1.30289e-06
TMEM185B	0.041146	1.30289e-06	1.30289e-06	-0.026152	1.30289e-06	1.30289e-06	-0.065837	1.30289e-06	1.30289e-06	0.75417	0.364867	1.30289e-06	0.045973	1.30289e-06	1.30289e-06	-0.46461	1.30289e-06	1.30289e-06
CCR10	-0.19793	1.30289e-06	1.30289e-06	0.15786	1.30289e-06	1.30289e-06	0.11141	1.30289e-06	1.30289e-06	0.78518	0.361173	1.30289e-06	0.12345	1.30289e-06	1.30289e-06	0.11109	0.0234368	1.30289e-06
CTLA4	-0.00082557	1.30289e-06	1.30289e-06	-0.23582	1.30289e-06	1.30289e-06	-0.1311	1.30289e-06	1.30289e-06	0.81287	0.361173	1.30289e-06	0.10019	1.30289e-06	1.30289e-06	-0.19868	1.30289e-06	1.30289e-06
AC004549.6	0.13476	1.30289e-06	1.30289e-06	0.028008	1.30289e-06	1.30289e-06	0.058247	1.30289e-06	1.30289e-06	0.59036	0.348087	1.30289e-06	0.15968	1.30289e-06	1.30289e-06	0.00069026	1.30289e-06	1.30289e-06
JAZF1	-0.36243	1.30289e-06	1.30289e-06	0.059506	1.30289e-06	1.30289e-06	0.31291	1.30289e-06	1.30289e-06	0.39798	0.318562	1.30289e-06	0.41805	0.0829758	1.30289e-06	0.07087	1.30289e-06	1.30289e-06
KB-1930G5.3	0.34696	1.30289e-06	1.30289e-06	0.18442	1.30289e-06	1.30289e-06	-0.030285	1.30289e-06	1.30289e-06	0.27332	0.312553	1.30289e-06	0.068681	1.30289e-06	1.30289e-06	0.096578	1.30289e-06	1.30289e-06
ITGA6	-0.85436	1.30289e-06	0.505008	-0.068728	1.30289e-06	1.30289e-06	-0.3398	1.30289e-06	1.30289e-06	0.80104	0.304615	1.30289e-06	-0.28991	1.30289e-06	0.148751	0.28452	1.30289e-06	1.30289e-06
RP11-212I21.2	0.14556	1.30289e-06	1.30289e-06	0.11586	1.30289e-06	1.30289e-06	-0.010587	1.30289e-06	1.30289e-06	0.42508	0.289472	1.30289e-06	-0.013666	0.0132408	1.30289e-06	0.22037	1.30289e-06	1.30289e-06
EFNA1	-0.025917	1.30289e-06	1.30289e-06	-0.060497	1.30289e-06	1.30289e-06	-0.14941	1.30289e-06	1.30289e-06	0.67369	0.284812	1.30289e-06	0.73751	0.12216	1.30289e-06	0.1699	1.30289e-06	1.30289e-06
AC022431.3	-0.069632	1.30289e-06	1.30289e-06	0.11989	1.30289e-06	1.30289e-06	0.15902	1.30289e-06	1.30289e-06	0.18876	0.284627	1.30289e-06	0.24337	1.30289e-06	1.30289e-06	0.19452	1.30289e-06	1.30289e-06
CDCA7L	-0.16838	1.30289e-06	1.30289e-06	-0.26241	1.30289e-06	1.30289e-06	0.13674	1.30289e-06	1.30289e-06	0.34393	0.277327	1.30289e-06	-0.02889	1.30289e-06	1.30289e-06	0.011557	1.30289e-06	1.30289e-06
NR2F1	0.011881	1.30289e-06	1.30289e-06	-0.17149	1.30289e-06	1.30289e-06	0.080694	1.30289e-06	1.30289e-06	0.23504	0.252298	1.30289e-06	-0.28996	0.0682168	1.30289e-06	-0.24328	1.30289e-06	1.30289e-06
DLX1	-0.17183	1.30289e-06	1.30289e-06	-0.02159	1.30289e-06	1.30289e-06	0.14082	1.30289e-06	1.30289e-06	0.44975	0.242828	1.30289e-06	0.31504	0.00705257	1.30289e-06	-0.28274	1.30289e-06	0.372835
MTHFSD	-0.18688	1.30289e-06	1.30289e-06	0.16664	1.30289e-06	1.30289e-06	-0.073814	1.30289e-06	1.30289e-06	0.53933	0.242706	1.30289e-06	-0.20832	1.30289e-06	1.30289e-06	0.18978	1.30289e-06	1.30289e-06
CHD1L	-0.30004	1.30289e-06	1.30289e-06	0.23904	1.30289e-06	1.30289e-06	-0.23983	1.30289e-06	1.30289e-06	0.34408	0.242706	1.30289e-06	0.095436	1.30289e-06	1.30289e-06	-0.073313	1.30289e-06	1.30289e-06
RP11-967K21.1	-0.1399	1.30289e-06	1.30289e-06	-0.30332	1.30289e-06	0.221277	0.17185	1.30289e-06	1.30289e-06	0.46754	0.232255	1.30289e-06	0.18367	1.30289e-06	1.30289e-06	-0.048439	1.30289e-06	1.30289e-06
NUTM2B-AS1	0.085849	1.30289e-06	1.30289e-06	0.17332	1.30289e-06	1.30289e-06	0.18519	1.30289e-06	1.30289e-06	0.62892	0.207905	1.30289e-06	0.31852	1.30289e-06	1.30289e-06	-0.041178	1.30289e-06	1.30289e-06
RP11-109P11.1	0.30516	1.30289e-06	1.30289e-06	0.029808	1.30289e-06	1.30289e-06	0.11529	1.30289e-06	1.30289e-06	0.29065	0.183694	1.30289e-06	0.16816	1.30289e-06	1.30289e-06	0.28847	1.30289e-06	1.30289e-06
CAPNS2	0.06897	1.30289e-06	1.30289e-06	0.15091	1.30289e-06	1.30289e-06	0.42513	1.30289e-06	1.30289e-06	0.56746	0.182966	1.30289e-06	0.19957	0.0194803	1.30289e-06	0.25849	1.30289e-06	1.30289e-06
CRLF3	-0.30556	1.30289e-06	0.226666	0.2347	1.30289e-06	1.30289e-06	-0.36094	1.30289e-06	1.30289e-06	0.35168	0.149423	1.30289e-06	0.045158	1.30289e-06	1.30289e-06	-0.059632	1.30289e-06	1.30289e-06
CTD-2061E19.6	0.099463	1.30289e-06	1.30289e-06	0.17378	1.30289e-06	1.30289e-06	0.23549	1.30289e-06	1.30289e-06	0.36478	0.147782	1.30289e-06	0.33283	0.0194803	1.30289e-06	0.23267	1.30289e-06	1.30289e-06
AC026202.3	0.25565	1.30289e-06	1.30289e-06	0.1574	1.30289e-06	1.30289e-06	0.030293	1.30289e-06	1.30289e-06	0.44971	0.144646	1.30289e-06	0.25867	0.239647	1.30289e-06	0.34377	0.0420342	1.30289e-06
FMOD	0.10091	1.30289e-06	1.30289e-06	-0.31581	1.30289e-06	1.30289e-06	0.2013	1.30289e-06	1.30289e-06	0.23915	0.144646	1.30289e-06	0.17094	1.30289e-06	1.30289e-06	0.43227	0.026505	1.30289e-06
CTA-109P11.4	0.20576	1.30289e-06	1.30289e-06	-0.10483	1.30289e-06	1.30289e-06	0.21215	1.30289e-06	1.30289e-06	0.37619	0.144646	1.30289e-06	0.41133	0.00705257	1.30289e-06	0.32208	1.30289e-06	1.30289e-06
AC026202.1	0.12681	1.30289e-06	1.30289e-06	-0.17752	1.30289e-06	1.30289e-06	0.32875	1.30289e-06	1.30289e-06	0.54351	0.142862	1.30289e-06	0.64758	0.0194803	1.30289e-06	-0.0207	1.30289e-06	1.30289e-06
SETBP1	-0.048212	1.30289e-06	1.30289e-06	0.27322	1.30289e-06	1.30289e-06	0.46364	1.30289e-06	1.30289e-06	0.40216	0.133292	1.30289e-06	-0.11554	1.30289e-06	1.30289e-06	0.38628	0.0494589	1.30289e-06
DIRC3	0.15124	1.30289e-06	1.30289e-06	0.39364	1.30289e-06	1.30289e-06	-0.010837	1.30289e-06	1.30289e-06	0.4466	0.133292	1.30289e-06	0.74523	0.107299	1.30289e-06	0.1844	0.026505	1.30289e-06
AKAP9	0.047686	1.30289e-06	1.30289e-06	0.016679	1.30289e-06	1.30289e-06	0.038428	1.30289e-06	1.30289e-06	0.26246	0.119015	1.30289e-06	0.36461	0.151024	1.30289e-06	0.41358	0.0494589	1.30289e-06
FGFR2	0.33823	1.30289e-06	1.30289e-06	0.059703	1.30289e-06	1.30289e-06	0.11665	1.30289e-06	1.30289e-06	0.74267	0.118254	1.30289e-06	0.30935	1.30289e-06	1.30289e-06	-0.18839	1.30289e-06	1.30289e-06
TMEM245	-0.037879	1.30289e-06	1.30289e-06	-0.31268	1.30289e-06	1.30289e-06	0.22418	1.30289e-06	1.30289e-06	0.2813	0.112326	1.30289e-06	-0.256	1.30289e-06	1.30289e-06	0.31394	0.026505	1.30289e-06
ZBTB38	-0.084831	1.30289e-06	1.30289e-06	-0.3646	1.30289e-06	0.427804	-0.16331	1.30289e-06	1.30289e-06	0.25433	0.102358	1.30289e-06	-0.48213	1.30289e-06	0.0500638	-0.76466	1.30289e-06	1.2694
IGFBP5	-0.080429	1.30289e-06	1.30289e-06	-0.1815	1.30289e-06	1.30289e-06	0.15776	1.30289e-06	1.30289e-06	0.48983	0.0873933	1.30289e-06	0.42358	0.0800495	1.30289e-06	0.45792	0.0494589	1.30289e-06
ARL8B	0.33242	1.30289e-06	1.30289e-06	0.38987	1.30289e-06	1.30289e-06	0.23374	1.30289e-06	1.30289e-06	0.39004	0.0873933	1.30289e-06	0.31565	0.00705257	1.30289e-06	0.31967	0.0389754	1.30289e-06
FH	0.095815	1.30289e-06	1.30289e-06	0.15228	1.30289e-06	1.30289e-06	-1.57	1.30289e-06	1.16754	0.32421	0.0873933	1.30289e-06	0.88195	1.38021	1.30289e-06	0.085627	1.30289e-06	1.30289e-06
HIBADH	0.12986	1.30289e-06	1.30289e-06	-0.52407	1.30289e-06	0.277175	0.043413	1.30289e-06	1.30289e-06	0.44708	0.0842388	1.30289e-06	0.3785	0.00831771	1.30289e-06	-0.02916	0.026505	1.30289e-06
CCDC170	0.32178	1.30289e-06	1.30289e-06	0.1775	1.30289e-06	1.30289e-06	0.24373	1.30289e-06	1.30289e-06	0.30375	0.0842388	1.30289e-06	0.13668	1.30289e-06	1.30289e-06	0.18161	0.026505	1.30289e-06
AF127577.12	0.076155	1.30289e-06	1.30289e-06	0.10998	1.30289e-06	1.30289e-06	0.22924	1.30289e-06	1.30289e-06	0.23616	0.0842388	1.30289e-06	-0.075449	1.30289e-06	1.30289e-06	0.068115	1.30289e-06	1.30289e-06
AHSA2	0.18217	1.30289e-06	1.30289e-06	0.19609	1.30289e-06	1.30289e-06	-0.17375	1.30289e-06	1.30289e-06	0.18065	0.0796669	1.30289e-06	-0.31056	1.30289e-06	1.30289e-06	-0.33934	1.30289e-06	0.160647
METTL5	-0.098721	1.30289e-06	1.30289e-06	-0.39247	1.30289e-06	0.0851467	-0.24644	1.30289e-06	1.30289e-06	0.20894	0.0781372	1.30289e-06	-0.32968	1.30289e-06	0.732003	-0.57579	1.30289e-06	1.19629
CCND1	-0.41416	1.30289e-06	0.131381	-0.84308	1.30289e-06	1.51261	0.0986	1.30289e-06	1.30289e-06	0.30201	0.0617535	1.30289e-06	-1.2562	1.30289e-06	1.37828	-0.76071	1.30289e-06	1.58137
ZNF234	-0.18984	1.30289e-06	1.30289e-06	0.2026	1.30289e-06	1.30289e-06	-0.0037339	1.30289e-06	1.30289e-06	-0.020628	0.0599335	1.30289e-06	-0.22461	0.00705257	1.30289e-06	0.009545	1.30289e-06	1.30289e-06
LRRC37A4P	-0.4768	1.30289e-06	1.30289e-06	0.068299	1.30289e-06	1.30289e-06	0.18014	1.30289e-06	1.30289e-06	0.38215	0.0581458	1.30289e-06	0.071143	1.30289e-06	1.30289e-06	0.26463	0.0238202	1.30289e-06
ZNF652	0.25871	1.30289e-06	1.30289e-06	0.27469	1.30289e-06	1.30289e-06	0.37658	1.30289e-06	1.30289e-06	0.47736	0.0484342	1.30289e-06	0.18726	1.30289e-06	1.30289e-06	-0.12375	1.30289e-06	1.30289e-06
AC018816.3	-0.18049	1.30289e-06	1.30289e-06	-0.14783	1.30289e-06	1.30289e-06	0.086566	1.30289e-06	1.30289e-06	0.24647	0.041097	1.30289e-06	0.59527	0.225369	1.30289e-06	0.74553	0.185662	1.30289e-06
FOXI1	0.16827	1.30289e-06	1.30289e-06	0.094144	1.30289e-06	1.30289e-06	-0.034862	1.30289e-06	1.30289e-06	0.37539	0.041097	1.30289e-06	-0.090904	1.30289e-06	1.30289e-06	0.077928	1.30289e-06	1.30289e-06
TMC4	0.139	1.30289e-06	1.30289e-06	-0.24363	1.30289e-06	1.30289e-06	0.23207	1.30289e-06	1.30289e-06	0.053926	0.041097	1.30289e-06	0.19448	1.30289e-06	1.30289e-06	0.18489	1.30289e-06	1.30289e-06
IST1	-1.1504	1.30289e-06	1.17072	-0.75344	1.30289e-06	0.0372179	-0.45472	1.30289e-06	0.153352	0.28487	0.0387811	1.30289e-06	0.11216	1.30289e-06	1.30289e-06	-0.34364	1.30289e-06	1.30289e-06
IGKV2D-24	-0.028962	1.30289e-06	1.30289e-06	0.43344	1.30289e-06	1.30289e-06	0.018717	1.30289e-06	1.30289e-06	-0.13054	0.03235	1.30289e-06	0.011339	1.30289e-06	1.30289e-06	-0.2891	1.30289e-06	1.30289e-06
RP11-500G22.2	-0.063904	1.30289e-06	1.30289e-06	-0.32652	1.30289e-06	1.30289e-06	0.27969	1.30289e-06	1.30289e-06	0.58822	0.0298173	1.30289e-06	0.28716	1.30289e-06	1.30289e-06	0.15403	1.30289e-06	1.30289e-06
MIR1208	-0.17413	1.30289e-06	1.30289e-06	-0.34359	1.30289e-06	0.896651	-0.09192	1.30289e-06	1.30289e-06	-0.18466	0.0285975	1.30289e-06	0.18264	1.30289e-06	1.30289e-06	0.43536	0.026505	1.30289e-06
RP11-37B2.1	0.11279	1.30289e-06	1.30289e-06	0.2562	1.30289e-06	1.30289e-06	-0.19132	1.30289e-06	1.30289e-06	0.52986	0.0285975	1.30289e-06	0.96166	0.306714	1.30289e-06	-0.23055	1.30289e-06	1.30289e-06
PAPPA	0.12399	1.30289e-06	1.30289e-06	-0.29989	1.30289e-06	0.193886	0.17759	1.30289e-06	1.30289e-06	0.29518	0.0285975	1.30289e-06	0.057548	0.0502802	1.30289e-06	0.13574	1.30289e-06	1.30289e-06
LINC01101	-0.011734	1.30289e-06	1.30289e-06	0.1522	1.30289e-06	1.30289e-06	0.08727	1.30289e-06	1.30289e-06	0.26876	0.0285975	1.30289e-06	-0.24474	1.30289e-06	1.30289e-06	-0.44347	1.30289e-06	0.371116
WDYHV1	-0.0090332	1.30289e-06	1.30289e-06	-0.50753	1.30289e-06	0.338227	0.27056	1.30289e-06	1.30289e-06	0.39669	0.0277643	1.30289e-06	0.38279	1.30289e-06	1.30289e-06	0.56517	0.026505	1.30289e-06
CTD-3110H11.1	0.12445	1.30289e-06	1.30289e-06	0.22632	1.30289e-06	1.30289e-06	0.06086	1.30289e-06	1.30289e-06	0.24076	0.0153863	1.30289e-06	0.18469	1.30289e-06	1.30289e-06	0.18001	1.30289e-06	1.30289e-06
RP11-438D8.2	-0.083225	1.30289e-06	1.30289e-06	0.048828	1.30289e-06	1.30289e-06	0.083942	1.30289e-06	1.30289e-06	0.12227	0.00882445	1.30289e-06	0.11062	1.30289e-06	1.30289e-06	-0.14	1.30289e-06	0.0184831
CDH1	-0.34924	1.30289e-06	1.30289e-06	0.22486	1.30289e-06	1.30289e-06	-0.35755	1.30289e-06	1.30289e-06	0.43056	0.00769175	1.30289e-06	0.46355	0.0194803	1.30289e-06	0.31452	0.0115298	0.010161
BBS1	-0.11892	1.30289e-06	1.30289e-06	-0.15268	1.30289e-06	0.092414	0.15682	1.30289e-06	1.30289e-06	0.20003	0.00769175	1.30289e-06	-0.34672	1.30289e-06	1.30289e-06	0.011377	1.30289e-06	1.30289e-06
TFPI2	-0.6484	1.30289e-06	0.650524	-0.010331	1.30289e-06	1.30289e-06	0.13712	1.30289e-06	1.30289e-06	-0.011636	0.00634998	1.30289e-06	0.3987	0.00602355	1.30289e-06	0.96897	0.297932	1.30289e-06
PSMD6-AS2	0.11506	1.30289e-06	1.30289e-06	0.22733	1.30289e-06	1.30289e-06	0.09926	1.30289e-06	1.30289e-06	0.17155	0.00634998	1.30289e-06	0.35734	0.171613	1.30289e-06	0.33657	0.163689	1.30289e-06
ATAD2	0.18964	1.30289e-06	1.30289e-06	-0.28928	1.30289e-06	1.30289e-06	-0.35393	1.30289e-06	0.0871564	0.21743	0.00634998	1.30289e-06	-0.3967	1.30289e-06	1.30289e-06	-0.19234	1.30289e-06	1.30289e-06
EBF1	0.13898	1.30289e-06	1.30289e-06	0.042426	1.30289e-06	1.30289e-06	0.41051	1.30289e-06	1.30289e-06	0.17343	0.00470623	1.30289e-06	-0.23752	0.110108	1.30289e-06	0.12086	1.30289e-06	1.30289e-06
KISS1	-0.34153	1.30289e-06	1.30289e-06	0.41637	1.30289e-06	1.30289e-06	0.061849	1.30289e-06	1.30289e-06	0.32007	0.00470623	1.30289e-06	0.49956	1.30289e-06	1.30289e-06	0.24841	1.30289e-06	1.30289e-06
ACOT12	-0.1328	1.30289e-06	1.30289e-06	-0.15016	1.30289e-06	1.30289e-06	0.10054	1.30289e-06	1.30289e-06	-0.24421	0.00376116	1.30289e-06	-0.35354	1.30289e-06	1.30289e-06	0.20553	1.30289e-06	1.30289e-06
ZNF697	0.12054	1.30289e-06	1.30289e-06	0.52221	1.30289e-06	1.30289e-06	0.09953	1.30289e-06	1.30289e-06	0.27656	0.00303151	1.30289e-06	0.7131	0.146953	1.30289e-06	0.38854	0.026505	1.30289e-06
VPS45	-0.0061235	1.30289e-06	1.30289e-06	-0.43292	1.30289e-06	0.377291	0.22289	1.30289e-06	1.30289e-06	0.18546	0.00239216	1.30289e-06	-0.52069	1.30289e-06	0.446848	-0.91593	1.30289e-06	1.12032
FANCC	-0.1905	1.30289e-06	1.30289e-06	0.086945	1.30289e-06	1.30289e-06	0.1274	1.30289e-06	1.30289e-06	0.22774	8.64332e-05	1.30289e-06	0.044448	1.30289e-06	1.30289e-06	-0.46537	1.30289e-06	0.27864
MAN1A2	-0.26844	1.30289e-06	1.30289e-06	0.069173	1.30289e-06	1.30289e-06	-0.00056469	1.30289e-06	1.30289e-06	-0.32875	1.30289e-06	0.0256984	0.36334	0.00713159	1.30289e-06	0.86996	0.775863	1.30289e-06
PRICKLE2-AS3	0.070164	1.30289e-06	1.30289e-06	0.038216	1.30289e-06	1.30289e-06	0.24591	1.30289e-06	1.30289e-06	0.40349	1.30289e-06	1.30289e-06	0.40787	0.189216	1.30289e-06	0.59295	0.429147	1.30289e-06
KIAA0907	-0.39832	1.30289e-06	0.289801	-0.050136	1.30289e-06	1.30289e-06	-0.18354	1.30289e-06	1.30289e-06	0.074764	1.30289e-06	1.30289e-06	0.83789	0.151932	1.30289e-06	0.70779	0.429147	1.30289e-06
AP006621.6	0.030942	1.30289e-06	1.30289e-06	-0.35914	1.30289e-06	0.120495	0.12359	1.30289e-06	1.30289e-06	-0.24737	1.30289e-06	1.30289e-06	0.24338	1.30289e-06	1.30289e-06	0.44008	0.393463	1.30289e-06
RNASEH2A	-0.7318	1.30289e-06	0.115132	0.20731	1.30289e-06	1.30289e-06	-0.2235	1.30289e-06	1.30289e-06	-1.8971	1.30289e-06	1.14777	0.72879	1.10605	1.30289e-06	0.71923	0.213551	1.30289e-06
TET2	-0.33236	1.30289e-06	0.142148	0.37494	1.30289e-06	1.30289e-06	0.011266	1.30289e-06	1.30289e-06	0.33554	1.30289e-06	1.30289e-06	0.2965	0.00705257	1.30289e-06	0.55582	0.213551	1.30289e-06
CCHCR1	-0.068258	1.30289e-06	1.30289e-06	0.089063	1.30289e-06	1.30289e-06	0.35402	1.30289e-06	1.30289e-06	0.10325	1.30289e-06	1.30289e-06	0.37946	0.262304	1.30289e-06	0.7744	0.212098	1.30289e-06
RHOF	-0.22726	1.30289e-06	1.30289e-06	-0.72858	1.30289e-06	0.215944	-0.031466	1.30289e-06	1.30289e-06	-0.2383	1.30289e-06	0.153598	0.39041	0.0776234	1.30289e-06	0.29153	0.143507	1.30289e-06
RP11-222K16.2	0.32795	1.30289e-06	1.30289e-06	-0.45129	1.30289e-06	1.30289e-06	0.3357	1.30289e-06	1.30289e-06	0.54017	1.30289e-06	1.30289e-06	0.34915	0.0393285	1.30289e-06	0.54509	0.143507	1.30289e-06
CTD-3137H5.1	0.28124	1.30289e-06	1.30289e-06	0.076591	1.30289e-06	1.30289e-06	0.070615	1.30289e-06	1.30289e-06	-0.8622	1.30289e-06	0.170576	0.17962	1.30289e-06	1.30289e-06	0.76023	0.143507	1.30289e-06
CTB-113I20.2	0.036413	1.30289e-06	1.30289e-06	0.18699	1.30289e-06	1.30289e-06	0.024697	1.30289e-06	1.30289e-06	-0.20231	1.30289e-06	1.30289e-06	-0.05775	1.30289e-06	1.30289e-06	0.36645	0.143507	1.30289e-06
CTD-2529O21.1	0.026327	1.30289e-06	1.30289e-06	0.35758	1.30289e-06	1.30289e-06	0.28979	1.30289e-06	1.30289e-06	0.016349	1.30289e-06	1.30289e-06	0.010864	1.30289e-06	1.30289e-06	0.28989	0.143507	1.30289e-06
MKLN1	0.13419	1.30289e-06	1.30289e-06	0.27108	1.30289e-06	1.30289e-06	-0.3405	1.30289e-06	0.224674	-0.1654	1.30289e-06	1.30289e-06	0.45016	0.264298	1.30289e-06	0.59754	0.126274	1.30289e-06
MIER3	-0.017583	1.30289e-06	1.30289e-06	0.088488	1.30289e-06	1.30289e-06	0.27585	1.30289e-06	1.30289e-06	0.21218	1.30289e-06	1.30289e-06	0.29922	0.296282	1.30289e-06	0.47915	0.112548	1.30289e-06
ANKRD35	-0.23449	1.30289e-06	1.30289e-06	-0.53629	1.30289e-06	1.30289e-06	-0.16443	1.30289e-06	1.30289e-06	-0.095767	1.30289e-06	1.30289e-06	0.17255	1.30289e-06	1.30289e-06	-0.15677	0.0910997	1.30289e-06
KCNQ1	0.19907	1.30289e-06	1.30289e-06	-0.014741	1.30289e-06	1.30289e-06	0.26573	1.30289e-06	1.30289e-06	-0.60404	1.30289e-06	0.0731561	0.50582	0.129529	1.30289e-06	-0.13861	0.0897054	1.30289e-06
CTC-425F1.4	0.15672	1.30289e-06	1.30289e-06	0.25639	1.30289e-06	1.30289e-06	-0.13687	1.30289e-06	1.30289e-06	-0.27606	1.30289e-06	0.135382	-0.060191	1.30289e-06	1.30289e-06	0.32421	0.0864998	1.30289e-06
TOB2	0.26503	1.30289e-06	1.30289e-06	-0.16445	1.30289e-06	1.30289e-06	0.41075	1.30289e-06	1.30289e-06	-0.039666	1.30289e-06	1.30289e-06	0.73405	0.134307	1.30289e-06	0.4901	0.0859876	1.30289e-06
TNNI1	0.15551	1.30289e-06	1.30289e-06	-0.083061	1.30289e-06	1.30289e-06	-0.016903	1.30289e-06	1.30289e-06	-0.30634	1.30289e-06	0.142583	0.56033	0.118833	1.30289e-06	0.4331	0.0848852	1.30289e-06
SMIM8	-0.20374	1.30289e-06	1.30289e-06	0.29273	1.30289e-06	1.30289e-06	0.051962	1.30289e-06	1.30289e-06	0.17185	1.30289e-06	1.30289e-06	-0.045275	1.30289e-06	1.30289e-06	0.20121	0.0848852	1.30289e-06
VGLL3	-0.047491	1.30289e-06	1.30289e-06	0.15413	1.30289e-06	1.30289e-06	0.31387	1.30289e-06	1.30289e-06	0.33168	1.30289e-06	1.30289e-06	0.47008	0.0462364	1.30289e-06	0.47067	0.0796904	1.30289e-06
MUTYH	-0.36036	1.30289e-06	0.145897	-0.4194	1.30289e-06	1.30289e-06	-0.61482	1.30289e-06	0.40862	0.13902	1.30289e-06	1.30289e-06	0.14493	1.30289e-06	1.30289e-06	0.30926	0.0732631	1.30289e-06
RP11-245J9.5	0.0072815	1.30289e-06	1.30289e-06	-0.36466	1.30289e-06	0.0175361	0.081197	1.30289e-06	1.30289e-06	0.24298	1.30289e-06	1.30289e-06	0.096741	1.30289e-06	1.30289e-06	0.24136	0.0732631	1.30289e-06
FBXW12	0.18918	1.30289e-06	1.30289e-06	0.010022	1.30289e-06	1.30289e-06	-0.14502	1.30289e-06	1.30289e-06	-0.10276	1.30289e-06	1.30289e-06	0.11276	1.30289e-06	1.30289e-06	0.42248	0.0732631	1.30289e-06
CATSPERB	-0.1826	1.30289e-06	1.30289e-06	0.22136	1.30289e-06	1.30289e-06	0.13462	1.30289e-06	1.30289e-06	-0.26833	1.30289e-06	0.212955	-0.042356	1.30289e-06	1.30289e-06	0.25092	0.0721853	1.30289e-06
LINC02210	-0.049653	1.30289e-06	1.30289e-06	-0.13676	1.30289e-06	1.30289e-06	-0.49706	1.30289e-06	0.122762	-0.45602	1.30289e-06	1.30289e-06	-0.36826	1.30289e-06	1.30289e-06	0.18467	0.0681589	1.30289e-06
MIR5695	0.17701	1.30289e-06	1.30289e-06	-0.089797	1.30289e-06	1.30289e-06	0.14922	1.30289e-06	1.30289e-06	-0.51103	1.30289e-06	0.239589	-0.071591	1.30289e-06	1.30289e-06	0.17569	0.0681589	1.30289e-06
LRRC56	0.35765	1.30289e-06	1.30289e-06	-0.59018	1.30289e-06	0.0238207	0.10922	1.30289e-06	1.30289e-06	0.17638	1.30289e-06	1.30289e-06	0.10697	1.30289e-06	1.30289e-06	0.5079	0.0681589	1.30289e-06
MAGI3	-0.17417	1.30289e-06	1.30289e-06	-0.44292	1.30289e-06	0.312846	-0.26889	1.30289e-06	1.30289e-06	-0.27012	1.30289e-06	1.30289e-06	-0.14702	1.30289e-06	1.30289e-06	0.40294	0.0630512	1.30289e-06
LRRC25	0.10981	1.30289e-06	1.30289e-06	-0.22713	1.30289e-06	1.30289e-06	0.4145	1.30289e-06	1.30289e-06	-0.17881	1.30289e-06	1.30289e-06	0.23102	1.30289e-06	1.30289e-06	0.52551	0.0630512	1.30289e-06
CENPS	-0.13282	1.30289e-06	1.30289e-06	-0.78892	1.30289e-06	0.566986	0.024958	1.30289e-06	1.30289e-06	-0.15763	1.30289e-06	1.30289e-06	0.051421	1.30289e-06	1.30289e-06	0.36067	0.0630512	1.30289e-06
ZSCAN23	-0.017102	1.30289e-06	1.30289e-06	-0.19611	1.30289e-06	1.30289e-06	-0.040113	1.30289e-06	1.30289e-06	-0.11401	1.30289e-06	1.30289e-06	0.45707	1.30289e-06	1.30289e-06	0.36642	0.0531932	1.30289e-06
AC005387.2	0.15061	1.30289e-06	1.30289e-06	0.16559	1.30289e-06	1.30289e-06	0.1423	1.30289e-06	1.30289e-06	-0.25437	1.30289e-06	0.214111	-0.21022	1.30289e-06	1.30289e-06	0.43156	0.0494589	1.30289e-06
AC005387.3	0.1272	1.30289e-06	1.30289e-06	0.29108	1.30289e-06	1.30289e-06	0.11598	1.30289e-06	1.30289e-06	-0.17528	1.30289e-06	1.30289e-06	-0.059727	0.366968	1.30289e-06	0.39788	0.026505	1.30289e-06
RP11-661C8.2	-0.0009127	1.30289e-06	1.30289e-06	-0.019682	1.30289e-06	1.30289e-06	0.13161	1.30289e-06	1.30289e-06	0.23595	1.30289e-06	1.30289e-06	0.76384	0.31052	1.30289e-06	0.43778	0.026505	1.30289e-06
FIBP	-0.38472	1.30289e-06	1.30289e-06	-0.086876	1.30289e-06	1.30289e-06	-0.23648	1.30289e-06	1.30289e-06	0.21184	1.30289e-06	1.30289e-06	0.60531	0.296282	1.30289e-06	0.13851	0.026505	1.30289e-06
PACS1	-0.22846	1.30289e-06	1.30289e-06	-1.1565	1.30289e-06	0.252838	0.12101	1.30289e-06	1.30289e-06	-0.094414	1.30289e-06	1.30289e-06	0.59765	0.246656	1.30289e-06	0.15305	0.026505	1.30289e-06
PEG10	0.35324	1.30289e-06	1.30289e-06	0.20754	1.30289e-06	1.30289e-06	0.27676	1.30289e-06	1.30289e-06	0.13997	1.30289e-06	1.30289e-06	0.44854	0.104988	1.30289e-06	0.44188	0.026505	1.30289e-06
ZC3H11A	-0.30305	1.30289e-06	1.30289e-06	-0.0379	1.30289e-06	1.30289e-06	-0.22899	1.30289e-06	1.30289e-06	0.20115	1.30289e-06	1.30289e-06	0.34774	0.0800495	1.30289e-06	-0.059147	0.026505	1.30289e-06
STAG3L5P-PVRIG2P-PILRB	-0.16815	1.30289e-06	0.574119	-0.13705	1.30289e-06	1.30289e-06	-0.2786	1.30289e-06	0.781291	0.24663	1.30289e-06	1.42414	0.51786	0.0776234	1.30289e-06	0.49443	0.026505	1.30289e-06
MEFV	0.20857	1.30289e-06	1.30289e-06	0.019178	1.30289e-06	1.30289e-06	0.1032	1.30289e-06	1.30289e-06	-0.85143	1.30289e-06	0.953985	0.3245	0.0475132	1.30289e-06	0.31985	0.026505	1.30289e-06
KLHDC10	-0.17649	1.30289e-06	1.30289e-06	0.12627	1.30289e-06	1.30289e-06	-0.27466	1.30289e-06	1.30289e-06	-0.14785	1.30289e-06	1.30289e-06	-0.064562	0.0194803	1.30289e-06	0.38759	0.026505	1.30289e-06
CENPS-CORT	-0.078449	1.30289e-06	1.30289e-06	-0.16561	1.30289e-06	0.0081035	-0.03535	1.30289e-06	1.30289e-06	-0.086381	1.30289e-06	1.30289e-06	0.19079	0.0194803	1.30289e-06	0.25614	0.026505	1.30289e-06
ADSSL1	0.27567	1.30289e-06	1.30289e-06	-0.012715	1.30289e-06	1.30289e-06	0.0043312	1.30289e-06	1.30289e-06	-0.24726	1.30289e-06	1.30289e-06	0.3501	0.0194803	1.30289e-06	0.057397	0.026505	1.30289e-06
MAP1S	-0.48974	1.30289e-06	1.30289e-06	0.31933	1.30289e-06	1.30289e-06	-0.044235	1.30289e-06	1.30289e-06	-0.10349	1.30289e-06	1.30289e-06	0.38384	0.0194803	1.30289e-06	0.50008	0.026505	1.30289e-06
RP11-155L15.1	0.11988	1.30289e-06	1.30289e-06	0.076055	1.30289e-06	1.30289e-06	0.056256	1.30289e-06	1.30289e-06	0.1895	1.30289e-06	1.30289e-06	0.1197	0.00705257	1.30289e-06	0.41676	0.026505	1.30289e-06
CANT1	-0.021431	1.30289e-06	1.30289e-06	-0.027577	1.30289e-06	1.30289e-06	-0.68476	1.30289e-06	0.712205	0.18968	1.30289e-06	1.30289e-06	-1.531	1.30289e-06	1.30519	-0.75556	0.026505	0.30026
RP1-166H1.2	-0.34557	1.30289e-06	1.30289e-06	-0.3834	1.30289e-06	1.30289e-06	-1.1523	1.30289e-06	0.130239	0.31986	1.30289e-06	1.30289e-06	-0.33733	1.30289e-06	0.385225	-0.086365	0.026505	1.30289e-06
RP11-358B23.5	-0.20565	1.30289e-06	1.30289e-06	0.16402	1.30289e-06	1.30289e-06	-0.63273	1.30289e-06	0.364832	-0.063362	1.30289e-06	1.30289e-06	-0.43503	1.30289e-06	0.2989	-0.47775	0.026505	1.30289e-06
AC002306.1	-0.16673	1.30289e-06	0.387301	0.36882	1.30289e-06	0.307728	0.12535	1.30289e-06	0.380353	-0.15818	1.30289e-06	0.39952	0.19016	1.30289e-06	0.22452	0.25655	0.026505	0.261006
RP11-962G15.1	0.092361	1.30289e-06	1.30289e-06	-0.041583	1.30289e-06	1.30289e-06	0.21544	1.30289e-06	1.30289e-06	-0.0052662	1.30289e-06	1.30289e-06	-0.27047	1.30289e-06	0.139452	0.34792	0.026505	1.30289e-06
RP11-708J19.1	-0.2713	1.30289e-06	1.30289e-06	0.013088	1.30289e-06	1.30289e-06	-0.086053	1.30289e-06	1.30289e-06	0.092292	1.30289e-06	1.30289e-06	-0.49523	1.30289e-06	0.0203697	0.33503	0.026505	1.30289e-06
DNMT3A	0.2096	1.30289e-06	1.30289e-06	0.23177	1.30289e-06	1.30289e-06	0.25771	1.30289e-06	1.30289e-06	-0.065718	1.30289e-06	1.30289e-06	-0.27148	1.30289e-06	1.30289e-06	0.22882	0.026505	1.30289e-06
TNC	-0.2805	1.30289e-06	1.30289e-06	-0.032521	1.30289e-06	1.30289e-06	0.098659	1.30289e-06	1.30289e-06	-0.2318	1.30289e-06	1.30289e-06	-0.29503	1.30289e-06	1.30289e-06	-0.13031	0.026505	1.30289e-06
ZSWIM5	-0.24358	1.30289e-06	1.30289e-06	-0.25955	1.30289e-06	1.30289e-06	-0.026604	1.30289e-06	1.30289e-06	-0.38356	1.30289e-06	0.239203	-0.072555	1.30289e-06	1.30289e-06	0.27142	0.026505	1.30289e-06
TRIM27	0.30281	1.30289e-06	1.30289e-06	0.17865	1.30289e-06	1.30289e-06	0.29727	1.30289e-06	1.30289e-06	0.05002	1.30289e-06	1.30289e-06	-0.14723	1.30289e-06	1.30289e-06	0.26275	0.026505	1.30289e-06
PIK3R3	-0.29669	1.30289e-06	1.30289e-06	-0.1662	1.30289e-06	1.30289e-06	0.11535	1.30289e-06	1.30289e-06	-0.53484	1.30289e-06	0.0327301	-0.010301	1.30289e-06	1.30289e-06	0.28762	0.026505	1.30289e-06
BRMS1	-0.021331	1.30289e-06	1.30289e-06	0.12102	1.30289e-06	1.30289e-06	0.16413	1.30289e-06	1.30289e-06	-0.0070562	1.30289e-06	1.30289e-06	0.01519	1.30289e-06	1.30289e-06	0.23257	0.026505	1.30289e-06
SPDYA	0.13129	1.30289e-06	1.30289e-06	0.092294	1.30289e-06	1.30289e-06	-0.04044	1.30289e-06	1.30289e-06	0.12237	1.30289e-06	1.30289e-06	0.29231	1.30289e-06	1.30289e-06	0.14169	0.026505	1.30289e-06
REN	0.24674	1.30289e-06	1.30289e-06	-0.20831	1.30289e-06	1.30289e-06	0.23637	1.30289e-06	1.30289e-06	-0.021372	1.30289e-06	1.30289e-06	-0.046376	1.30289e-06	1.30289e-06	0.24978	0.026505	1.30289e-06
PRDX2	0.12534	1.30289e-06	1.30289e-06	-0.11211	1.30289e-06	1.30289e-06	-0.40432	1.30289e-06	1.30289e-06	-0.42292	1.30289e-06	1.30289e-06	0.27442	1.30289e-06	1.30289e-06	0.42353	0.026505	1.30289e-06
COX11	-0.94695	1.30289e-06	0.251921	0.14208	1.30289e-06	1.30289e-06	-2.0472	1.30289e-06	0.598076	0.060764	1.30289e-06	1.30289e-06	-0.038783	1.30289e-06	1.30289e-06	0.11854	0.026505	1.30289e-06
USHBP1	0.42391	1.30289e-06	1.30289e-06	0.17039	1.30289e-06	1.30289e-06	0.18205	1.30289e-06	1.30289e-06	-0.50805	1.30289e-06	0.474682	0.0062897	1.30289e-06	1.30289e-06	0.22576	0.026505	1.30289e-06
MAN2B1	-0.15711	1.30289e-06	1.30289e-06	-0.063015	1.30289e-06	1.30289e-06	-0.21653	1.30289e-06	1.30289e-06	-0.50732	1.30289e-06	0.782624	0.26524	1.30289e-06	1.30289e-06	0.2527	0.026505	1.30289e-06
COQ5	0.12426	1.30289e-06	1.30289e-06	0.038574	1.30289e-06	1.30289e-06	-0.96542	1.30289e-06	0.757958	-0.09736	1.30289e-06	1.30289e-06	0.20504	1.30289e-06	1.30289e-06	0.38755	0.026505	1.30289e-06
HCG11	0.054928	1.30289e-06	1.30289e-06	0.15331	1.30289e-06	1.30289e-06	0.2341	1.30289e-06	1.30289e-06	-0.059557	1.30289e-06	1.30289e-06	0.021423	1.30289e-06	1.30289e-06	0.31121	0.026505	1.30289e-06
AC145110.1	0.13552	1.30289e-06	1.30289e-06	-0.10881	1.30289e-06	1.30289e-06	-0.048658	1.30289e-06	1.30289e-06	-0.016184	1.30289e-06	1.30289e-06	0.16039	1.30289e-06	1.30289e-06	0.3391	0.026505	1.30289e-06
HLF	-0.23093	1.30289e-06	1.30289e-06	-0.1545	1.30289e-06	1.30289e-06	0.054263	1.30289e-06	1.30289e-06	0.12627	1.30289e-06	1.30289e-06	0.33686	0.0194803	1.30289e-06	0.18844	0.0249383	1.30289e-06
RAMP2	0.13625	1.30289e-06	1.30289e-06	0.13311	1.30289e-06	1.30289e-06	0.15723	1.30289e-06	1.30289e-06	0.22921	1.30289e-06	1.30289e-06	0.0041656	1.30289e-06	1.30289e-06	0.23071	0.0249383	1.30289e-06
HAO2	-0.46565	1.30289e-06	0.198227	0.10853	1.30289e-06	1.30289e-06	-0.49121	1.30289e-06	0.781538	-0.28191	1.30289e-06	1.30289e-06	0.065618	1.30289e-06	1.30289e-06	0.28137	0.0238202	1.30289e-06
CRACR2B	-0.16702	1.30289e-06	1.30289e-06	-0.68143	1.30289e-06	0.516658	0.0066619	1.30289e-06	1.30289e-06	-0.46189	1.30289e-06	0.734018	-0.41474	1.30289e-06	0.020154	0.15485	0.0234368	1.30289e-06
TFG	-0.50265	1.30289e-06	0.678447	-0.038549	1.30289e-06	1.30289e-06	-0.39393	1.30289e-06	0.13277	0.31617	1.30289e-06	1.30289e-06	-0.6241	1.30289e-06	1.0425	-0.09367	0.0203997	1.30289e-06
HIST4H4	-0.097526	1.30289e-06	1.30289e-06	-0.70362	1.30289e-06	0.206501	0.10184	1.30289e-06	1.30289e-06	0.21981	1.30289e-06	1.30289e-06	-0.056468	1.30289e-06	1.30289e-06	0.16443	0.0203997	1.30289e-06
MIR4498	-0.14547	1.30289e-06	1.30289e-06	-0.063397	1.30289e-06	1.30289e-06	-0.15154	1.30289e-06	1.30289e-06	-0.079818	1.30289e-06	1.30289e-06	-0.22558	0.189216	1.30289e-06	-0.49032	0.0115298	1.30289e-06
SNU13	-3.9389	1.30289e-06	2.14935	-3.32	1.30289e-06	2.17451	-5.0543	1.30289e-06	2.41341	-4.5669	1.30289e-06	2.36381	-4.7168	1.30289e-06	2.48852	-3.3964	0.0115298	2.40528
TBC1D24	0.17098	1.30289e-06	1.30289e-06	0.21987	1.30289e-06	1.30289e-06	0.44397	1.30289e-06	1.30289e-06	-0.25296	1.30289e-06	1.30289e-06	0.011892	1.30289e-06	1.30289e-06	0.54446	0.0115298	1.30289e-06
THOC7-AS1	-0.069549	1.30289e-06	1.30289e-06	-0.51029	1.30289e-06	1.30289e-06	-0.033858	1.30289e-06	1.30289e-06	-0.0015713	1.30289e-06	1.30289e-06	0.33394	0.0194803	1.30289e-06	0.36047	0.00645444	1.30289e-06
LRRC41	-0.31897	1.30289e-06	0.289801	-0.51427	1.30289e-06	1.30289e-06	-0.059646	1.30289e-06	1.30289e-06	-0.64184	1.30289e-06	0.462967	-0.77959	1.30289e-06	0.399615	0.42228	0.00645444	1.30289e-06
RP4-635E18.8	0.1719	1.30289e-06	1.30289e-06	-0.033646	1.30289e-06	1.30289e-06	0.13388	1.30289e-06	1.30289e-06	0.12581	1.30289e-06	1.30289e-06	-0.10525	1.30289e-06	1.30289e-06	0.32114	0.00645444	1.30289e-06
HOMER3	0.11653	1.30289e-06	1.30289e-06	0.035257	1.30289e-06	1.30289e-06	0.005377	1.30289e-06	1.30289e-06	-0.74301	1.30289e-06	0.774918	0.10465	0.307143	1.30289e-06	0.049892	1.30289e-06	1.30289e-06
SCTR	0.18114	1.30289e-06	1.30289e-06	-0.026087	1.30289e-06	1.30289e-06	-0.15835	1.30289e-06	1.30289e-06	-0.1051	1.30289e-06	1.30289e-06	0.28827	0.262304	1.30289e-06	0.14211	1.30289e-06	1.30289e-06
DNAL4	0.01941	1.30289e-06	1.30289e-06	-0.29964	1.30289e-06	1.30289e-06	0.18074	1.30289e-06	1.30289e-06	-0.73881	1.30289e-06	1.09732	0.88916	0.19962	1.30289e-06	0.48443	1.30289e-06	1.30289e-06
FAT4	-0.38566	1.30289e-06	0.0197039	-0.11674	1.30289e-06	1.30289e-06	-0.091455	1.30289e-06	1.30289e-06	0.22354	1.30289e-06	1.30289e-06	-0.15394	0.188405	1.30289e-06	-0.10066	1.30289e-06	1.30289e-06
EFNA3	0.40264	1.30289e-06	1.30289e-06	-0.18171	1.30289e-06	1.30289e-06	-0.35115	1.30289e-06	1.30289e-06	-0.50208	1.30289e-06	0.327036	0.039633	0.167561	1.30289e-06	-0.13861	1.30289e-06	0.0514804
SNORA3	0.099832	1.30289e-06	1.30289e-06	0.16877	1.30289e-06	1.30289e-06	0.15671	1.30289e-06	1.30289e-06	0.16429	1.30289e-06	1.30289e-06	0.27957	0.141281	1.30289e-06	0.14459	1.30289e-06	1.30289e-06
AC000032.2	-0.014276	1.30289e-06	1.30289e-06	-0.41863	1.30289e-06	0.0564051	0.17164	1.30289e-06	1.30289e-06	-0.62811	1.30289e-06	0.679983	-0.14132	0.115545	1.30289e-06	-0.23951	1.30289e-06	1.30289e-06
IFNGR2	0.075838	1.30289e-06	1.30289e-06	-0.35161	1.30289e-06	0.852293	0.1209	1.30289e-06	1.30289e-06	-0.066733	1.30289e-06	1.30289e-06	0.72417	0.115545	1.30289e-06	-0.041753	1.30289e-06	1.30289e-06
TBC1D31	-0.22375	1.30289e-06	1.30289e-06	-0.37577	1.30289e-06	0.34927	-0.083874	1.30289e-06	1.30289e-06	0.041625	1.30289e-06	1.30289e-06	-0.12859	0.112562	1.30289e-06	-0.26109	1.30289e-06	0.0148368
BCL2L15	-0.35756	1.30289e-06	0.341726	-0.45764	1.30289e-06	0.0883955	0.27412	1.30289e-06	1.30289e-06	-0.10064	1.30289e-06	1.30289e-06	0.31745	0.0965698	1.30289e-06	0.043686	1.30289e-06	1.30289e-06
HCG16	0.16386	1.30289e-06	1.30289e-06	-0.11073	1.30289e-06	1.30289e-06	0.043775	1.30289e-06	1.30289e-06	0.17065	1.30289e-06	1.30289e-06	0.037099	0.0918411	1.30289e-06	0.18058	1.30289e-06	1.30289e-06
GBAP1	-0.21295	1.30289e-06	0.147475	-0.20948	1.30289e-06	1.30289e-06	0.16907	1.30289e-06	1.30289e-06	0.024425	1.30289e-06	1.30289e-06	0.34036	0.0820074	1.30289e-06	0.22011	1.30289e-06	1.30289e-06
NCOA1	-0.064989	1.30289e-06	1.30289e-06	-0.3141	1.30289e-06	1.30289e-06	0.13681	1.30289e-06	1.30289e-06	0.0043899	1.30289e-06	1.30289e-06	-0.211	0.0800495	1.30289e-06	-0.29275	1.30289e-06	1.30289e-06
PCBD2	-0.092549	1.30289e-06	1.30289e-06	-0.43718	1.30289e-06	1.30289e-06	0.045302	1.30289e-06	1.30289e-06	0.274	1.30289e-06	1.30289e-06	0.47411	0.0776234	1.30289e-06	-0.00079822	1.30289e-06	1.30289e-06
GOLT1A	-0.035547	1.30289e-06	1.30289e-06	-0.043183	1.30289e-06	1.30289e-06	0.007327	1.30289e-06	1.30289e-06	0.083856	1.30289e-06	1.30289e-06	0.63463	0.0682168	1.30289e-06	-0.30114	1.30289e-06	1.30289e-06
CACNA1A	-0.22027	1.30289e-06	1.30289e-06	-0.19049	1.30289e-06	1.30289e-06	-0.056092	1.30289e-06	1.30289e-06	-0.099697	1.30289e-06	1.30289e-06	0.5193	0.05039	1.30289e-06	0.26461	1.30289e-06	1.30289e-06
NBPF10	-0.61933	1.30289e-06	0.299375	-1.0806	1.30289e-06	0.116768	0.24811	1.30289e-06	1.30289e-06	-0.40171	1.30289e-06	1.30289e-06	0.3129	0.0502802	1.30289e-06	-0.12545	1.30289e-06	1.30289e-06
SOX4	-0.29208	1.30289e-06	1.30289e-06	0.089302	1.30289e-06	1.30289e-06	0.29172	1.30289e-06	1.30289e-06	-0.018654	1.30289e-06	1.30289e-06	0.073063	0.0458197	1.30289e-06	-0.32169	1.30289e-06	1.30289e-06
C12orf49	-0.26648	1.30289e-06	1.30289e-06	-0.15684	1.30289e-06	1.30289e-06	0.12871	1.30289e-06	1.30289e-06	0.028206	1.30289e-06	1.30289e-06	-0.23739	0.0447333	1.30289e-06	-0.67073	1.30289e-06	0.452188
CCDC18	-0.15839	1.30289e-06	1.30289e-06	-0.013146	1.30289e-06	1.30289e-06	0.0098844	1.30289e-06	1.30289e-06	-0.090002	1.30289e-06	1.30289e-06	0.59672	0.0447333	1.30289e-06	-0.37596	1.30289e-06	1.30289e-06
NXF1	-4.5373	1.30289e-06	1.65269	-4.5037	1.30289e-06	1.72296	-3.7504	1.30289e-06	1.44253	-4.67	1.30289e-06	1.49716	-3.8147	0.0433807	1.66029	-3.7791	1.30289e-06	1.57823
NUP54	-0.43084	1.30289e-06	0.18717	-0.57288	1.30289e-06	0.0373769	-0.49382	1.30289e-06	0.3303	-0.99607	1.30289e-06	1.06208	-0.35516	0.0393285	0.24252	-0.47966	1.30289e-06	0.371116
TMEM75	-0.81559	1.30289e-06	0.28643	-1.2507	1.30289e-06	0.199778	0.22177	1.30289e-06	1.30289e-06	-0.0051036	1.30289e-06	1.30289e-06	0.57092	0.0362296	1.30289e-06	-0.42139	1.30289e-06	0.00399252
MRPS18C	-1.3579	1.30289e-06	1.20859	-1.1314	1.30289e-06	0.777141	-2.8271	1.30289e-06	1.58334	-0.90919	1.30289e-06	0.468977	-0.39863	0.0314755	0.0451677	-0.58124	1.30289e-06	0.272243
EFEMP2	-0.14441	1.30289e-06	1.30289e-06	-0.19887	1.30289e-06	1.30289e-06	0.28909	1.30289e-06	1.30289e-06	-0.23708	1.30289e-06	1.30289e-06	0.27436	0.0303717	1.30289e-06	0.027531	1.30289e-06	1.30289e-06
TSPAN1	-0.19562	1.30289e-06	1.30289e-06	-0.23979	1.30289e-06	1.30289e-06	0.33868	1.30289e-06	1.30289e-06	-0.4883	1.30289e-06	1.14777	0.31538	0.0272364	1.30289e-06	0.073319	1.30289e-06	1.30289e-06
AP006621.8	0.22337	1.30289e-06	1.30289e-06	-0.020376	1.30289e-06	1.30289e-06	0.15447	1.30289e-06	1.30289e-06	-0.45954	1.30289e-06	0.204181	0.36149	0.0194803	1.30289e-06	0.31226	1.30289e-06	1.30289e-06
CTD-2026K11.3	0.34792	1.30289e-06	1.30289e-06	0.11668	1.30289e-06	1.30289e-06	0.24444	1.30289e-06	1.30289e-06	0.070483	1.30289e-06	1.30289e-06	0.62797	0.0194803	1.30289e-06	0.085713	1.30289e-06	1.30289e-06
GPR37L1	0.070879	1.30289e-06	1.30289e-06	-0.13644	1.30289e-06	0.133648	0.039406	1.30289e-06	1.30289e-06	0.11524	1.30289e-06	1.30289e-06	0.22663	0.0194803	1.30289e-06	0.2125	1.30289e-06	1.30289e-06
MAFF	0.20898	1.30289e-06	1.30289e-06	0.1258	1.30289e-06	1.30289e-06	-0.01224	1.30289e-06	1.30289e-06	-0.099348	1.30289e-06	1.30289e-06	0.47111	0.0194803	1.30289e-06	0.0051736	1.30289e-06	1.30289e-06
FAM114A1	-0.091418	1.30289e-06	1.30289e-06	-0.067743	1.30289e-06	1.30289e-06	-0.28755	1.30289e-06	1.30289e-06	0.54307	1.30289e-06	1.30289e-06	0.35735	0.0194803	1.30289e-06	-0.028926	1.30289e-06	1.30289e-06
SLC25A22	0.34318	1.30289e-06	1.30289e-06	-0.099505	1.30289e-06	1.30289e-06	0.18641	1.30289e-06	1.30289e-06	0.17804	1.30289e-06	1.30289e-06	0.28924	0.00831771	1.30289e-06	-0.18034	1.30289e-06	1.30289e-06
CBX6	-0.29272	1.30289e-06	1.30289e-06	-0.20002	1.30289e-06	1.30289e-06	-0.20309	1.30289e-06	0.13385	-0.81003	1.30289e-06	1.04294	0.52386	0.00831771	1.30289e-06	0.26666	1.30289e-06	1.30289e-06
BANF1	-0.94296	1.30289e-06	0.213225	-1.1672	1.30289e-06	0.22958	-2.4722	1.30289e-06	0.689538	-4.2918	1.30289e-06	0.995735	-2.6187	0.00705257	0.746907	-1.4275	1.30289e-06	0.470299
MRPS31	-0.4419	1.30289e-06	0.14677	-0.69785	1.30289e-06	0.127155	-1.5465	1.30289e-06	1.64292	-0.4242	1.30289e-06	0.207402	0.088072	0.00705257	1.30289e-06	-0.41015	1.30289e-06	1.30289e-06
FAM129C	-0.16823	1.30289e-06	1.30289e-06	0.027276	1.30289e-06	1.30289e-06	0.20975	1.30289e-06	1.30289e-06	-0.12106	1.30289e-06	1.30289e-06	0.52827	0.00705257	1.30289e-06	0.10783	1.30289e-06	1.30289e-06
LINC00092	-0.10283	1.30289e-06	1.30289e-06	0.23628	1.30289e-06	1.30289e-06	0.18735	1.30289e-06	1.30289e-06	0.060737	1.30289e-06	1.30289e-06	0.23219	0.00705257	1.30289e-06	-0.48782	1.30289e-06	1.30289e-06
CTC-250I14.6	-0.53804	1.30289e-06	0.0174384	-0.20959	1.30289e-06	1.30289e-06	-0.050973	1.30289e-06	1.30289e-06	-0.70524	1.30289e-06	0.293804	0.41433	0.00705257	1.30289e-06	0.018363	1.30289e-06	1.30289e-06
DKFZP667F0711	0.050237	1.30289e-06	1.30289e-06	0.39818	1.30289e-06	1.30289e-06	0.27263	1.30289e-06	1.30289e-06	0.064223	1.30289e-06	1.30289e-06	0.26208	0.00647472	1.30289e-06	0.089705	1.30289e-06	1.30289e-06
ATG10	-0.099044	1.30289e-06	1.30289e-06	-0.38629	1.30289e-06	0.11469	0.047638	1.30289e-06	1.30289e-06	0.026315	1.30289e-06	1.30289e-06	0.15606	0.000675854	1.30289e-06	-0.037016	1.30289e-06	1.30289e-06
CLK2	-0.42675	1.30289e-06	0.046996	-0.61986	1.30289e-06	0.0422591	0.20325	1.30289e-06	1.30289e-06	-0.44953	1.30289e-06	0.477663	0.38463	0.000596696	1.30289e-06	0.065123	1.30289e-06	1.30289e-06
U2AF1	-3.4723	1.30289e-06	3.08355	-4.2954	1.30289e-06	3.25964	-5.2067	1.30289e-06	2.78252	-5.6318	1.30289e-06	3.20831	-4.2637	1.30289e-06	3.00436	-3.6005	1.30289e-06	2.90728
CCT6A	-3.2909	1.30289e-06	2.86614	-4.3793	1.30289e-06	2.85636	-4.2969	1.30289e-06	2.78252	-4.8559	1.30289e-06	3.20831	-4.7152	1.30289e-06	3.00436	-3.5077	1.30289e-06	2.90728
RN7SL694P	-6.3342	1.30289e-06	3.08355	-5.807	1.30289e-06	3.25964	-5.7842	1.30289e-06	2.78252	-5.8975	1.30289e-06	3.20831	-5.8925	1.30289e-06	3.00436	-4.33	1.30289e-06	2.90728
SRSF1	-3.1232	1.30289e-06	2.86614	-3.9929	1.30289e-06	2.86967	-4.8771	1.30289e-06	2.76904	-5.0772	1.30289e-06	2.82016	-5.2126	1.30289e-06	3.00436	-3.546	1.30289e-06	2.78252
RPS3A	-1.7713	1.30289e-06	1.15654	-2.1743	1.30289e-06	2.55517	-2.372	1.30289e-06	2.76904	-3.9633	1.30289e-06	3.20831	-3.1043	1.30289e-06	3.00436	-2.4155	1.30289e-06	2.90728
RPS17	-3.4772	1.30289e-06	2.4973	-4.6275	1.30289e-06	2.70708	-3.8967	1.30289e-06	2.76904	-4.846	1.30289e-06	2.82016	-5.0649	1.30289e-06	2.83209	-4.0677	1.30289e-06	2.78252
POLR2J	-4.1511	1.30289e-06	1.74302	-4.0695	1.30289e-06	2.83476	-4.0216	1.30289e-06	2.76904	-4.8072	1.30289e-06	2.82016	-5.0567	1.30289e-06	2.83209	-3.941	1.30289e-06	2.75252
PHB	-2.8197	1.30289e-06	2.86614	-3.3422	1.30289e-06	2.86967	-4.5476	1.30289e-06	2.76904	-4.5381	1.30289e-06	3.20831	-4.2189	1.30289e-06	2.83209	-3.6838	1.30289e-06	2.78252
PSMD11	-1.7715	1.30289e-06	2.35458	-2.839	1.30289e-06	2.38269	-3.1941	1.30289e-06	2.34161	-2.7845	1.30289e-06	2.82016	-4.0638	1.30289e-06	2.83209	-2.8304	1.30289e-06	2.78252
WDR43	-2.6201	1.30289e-06	2.86614	-4.3837	1.30289e-06	3.25964	-2.576	1.30289e-06	2.76904	-3.6706	1.30289e-06	2.82016	-4.2895	1.30289e-06	2.83209	-2.5812	1.30289e-06	2.78252
PSMA6	-5.2063	1.30289e-06	3.08355	-5.3911	1.30289e-06	3.25964	-4.0631	1.30289e-06	2.76904	-5.2837	1.30289e-06	3.20831	-4.3741	1.30289e-06	2.83209	-3.8525	1.30289e-06	2.78252
SF3B5	-4.493	1.30289e-06	3.08355	-5.6314	1.30289e-06	3.25964	-5.1948	1.30289e-06	2.76904	-4.1378	1.30289e-06	2.39946	-4.6493	1.30289e-06	2.83209	-4.6543	1.30289e-06	2.78252
CCT4	-2.1927	1.30289e-06	2.86614	-5.4441	1.30289e-06	2.85824	-3.0954	1.30289e-06	2.73542	-3.5412	1.30289e-06	2.82016	-3.8499	1.30289e-06	2.83209	-3.094	1.30289e-06	2.78252
PSMB7	-3.5753	1.30289e-06	3.08355	-4.5899	1.30289e-06	3.25964	-3.4143	1.30289e-06	2.76904	-4.9855	1.30289e-06	2.82016	-3.7117	1.30289e-06	2.83209	-3.3909	1.30289e-06	2.78252
GNL3	-2.1232	1.30289e-06	2.07998	-3.0884	1.30289e-06	2.85636	-2.2628	1.30289e-06	2.48466	-4.3181	1.30289e-06	2.82016	-4.0708	1.30289e-06	2.83209	-2.9674	1.30289e-06	2.78252
RPS23	-1.5831	1.30289e-06	1.80841	-2.1503	1.30289e-06	2.0511	-2.4092	1.30289e-06	2.45051	-4.8077	1.30289e-06	3.20831	-4.0375	1.30289e-06	2.83209	-2.5066	1.30289e-06	2.34989
XPO1	-5.4414	1.30289e-06	2.86614	-4.1654	1.30289e-06	2.529	-4.8906	1.30289e-06	2.76904	-5.0965	1.30289e-06	2.82016	-5.3648	1.30289e-06	2.83209	-3.5073	1.30289e-06	2.78252
VPS25	-3.4709	1.30289e-06	2.86614	-3.309	1.30289e-06	2.85824	-5.3053	1.30289e-06	2.76904	-2.8974	1.30289e-06	2.40318	-3.5325	1.30289e-06	2.83209	-3.7866	1.30289e-06	2.78252
AC020934.1	-5.2075	1.30289e-06	2.86614	-4.9192	1.30289e-06	2.85511	-5.8633	1.30289e-06	2.76904	-5.9934	1.30289e-06	2.82016	-5.6782	1.30289e-06	2.83209	-5.1175	1.30289e-06	2.78252
PHB2	-3.7643	1.30289e-06	2.4973	-5.1085	1.30289e-06	2.73142	-5.3555	1.30289e-06	2.76904	-5.5607	1.30289e-06	2.82016	-4.7702	1.30289e-06	2.83209	-4.6282	1.30289e-06	2.78252
SKIV2L2	-1.8105	1.30289e-06	2.86614	-3.6121	1.30289e-06	2.85511	-3.5687	1.30289e-06	2.67695	-4.585	1.30289e-06	2.82016	-3.1857	1.30289e-06	2.83209	-2.4266	1.30289e-06	2.78252
SF3B4	-3.2185	1.30289e-06	2.86614	-3.8643	1.30289e-06	2.85824	-4.5056	1.30289e-06	2.73542	-4.9849	1.30289e-06	2.82016	-3.0474	1.30289e-06	2.83209	-2.9615	1.30289e-06	2.7597
RPL36	-1.8871	1.30289e-06	1.8663	-4.3977	1.30289e-06	2.10963	-1.5736	1.30289e-06	2.07608	-4.2559	1.30289e-06	2.82016	-3.2204	1.30289e-06	2.83209	-2.7254	1.30289e-06	2.52143
HSPE1	-3.492	1.30289e-06	2.86614	-5.7186	1.30289e-06	2.65208	-5.0733	1.30289e-06	1.82481	-5.077	1.30289e-06	2.77263	-4.6967	1.30289e-06	2.83209	-3.234	1.30289e-06	2.7597
CTD-2659N19.4	-4.1098	1.30289e-06	2.86614	-4.5989	1.30289e-06	2.55517	-5.2905	1.30289e-06	2.76904	-4.3435	1.30289e-06	2.77263	-4.9824	1.30289e-06	2.83209	-2.3497	1.30289e-06	1.96642
AC008391.1	-5.5438	1.30289e-06	2.86614	-4.7199	1.30289e-06	2.85511	-5.7478	1.30289e-06	2.76904	-5.8381	1.30289e-06	2.7469	-5.9114	1.30289e-06	2.83209	-5.6298	1.30289e-06	2.78252
RUVBL2	-2.613	1.30289e-06	2.86614	-3.4468	1.30289e-06	2.85824	-3.3308	1.30289e-06	2.76904	-4.5006	1.30289e-06	2.82016	-3.1859	1.30289e-06	2.83209	-2.2107	1.30289e-06	2.52143
PPIE	-1.9744	1.30289e-06	2.4973	-1.4257	1.30289e-06	1.61279	-2.2985	1.30289e-06	2.73542	-2.1714	1.30289e-06	2.03882	-1.9999	1.30289e-06	2.83209	-1.7318	1.30289e-06	1.72306
PHF5A	-2.8552	1.30289e-06	2.4973	-3.9829	1.30289e-06	2.85511	-4.4534	1.30289e-06	2.76904	-5.7414	1.30289e-06	2.82016	-4.3168	1.30289e-06	2.83209	-2.8739	1.30289e-06	2.39556
RPL26	-2.0969	1.30289e-06	1.0003	-2.6209	1.30289e-06	2.27992	-3.2329	1.30289e-06	2.48466	-4.1621	1.30289e-06	2.61439	-3.3942	1.30289e-06	2.83209	-2.4919	1.30289e-06	2.14789
XRCC6	-2.7021	1.30289e-06	2.86614	-3.5207	1.30289e-06	2.85636	-2.4818	1.30289e-06	2.48466	-2.5674	1.30289e-06	2.5236	-3.516	1.30289e-06	2.83209	-1.7678	1.30289e-06	2.45149
EIF3A	-2.8007	1.30289e-06	2.4973	-3.5069	1.30289e-06	2.73142	-2.9193	1.30289e-06	2.72033	-3.8905	1.30289e-06	2.65956	-3.7762	1.30289e-06	2.83209	-2.8749	1.30289e-06	2.52143
POLR2L	-4.5604	1.30289e-06	2.86614	-2.7582	1.30289e-06	1.36525	-4.8416	1.30289e-06	2.76904	-4.7893	1.30289e-06	2.67325	-4.7903	1.30289e-06	2.83209	-4.0535	1.30289e-06	2.78252
TRIAP1	-2.3706	1.30289e-06	1.06273	-2.6111	1.30289e-06	1.50646	-4.1387	1.30289e-06	2.18555	-3.9796	1.30289e-06	2.77263	-3.9701	1.30289e-06	2.83209	-3.3712	1.30289e-06	2.7597
SNRPD1	-4.5514	1.30289e-06	2.86614	-6.1423	1.30289e-06	2.85824	-4.2839	1.30289e-06	2.48466	-5.1856	1.30289e-06	2.53298	-5.0484	1.30289e-06	2.83209	-4.4781	1.30289e-06	2.78252
AC092069.1	-7.0506	1.30289e-06	2.86614	-5.743	1.30289e-06	2.65208	-6.0343	1.30289e-06	2.55083	-5.6864	1.30289e-06	2.59108	-5.6846	1.30289e-06	2.78252	-5.428	1.30289e-06	2.78252
RBM8A	-2.9512	1.30289e-06	2.86614	-3.0492	1.30289e-06	2.55517	-3.7675	1.30289e-06	2.48466	-4.5071	1.30289e-06	2.78252	-3.487	1.30289e-06	2.78252	-2.9776	1.30289e-06	2.75252
HSPA9	-4.2014	1.30289e-06	2.86614	-5.2512	1.30289e-06	2.79915	-5.3453	1.30289e-06	2.57708	-5.1438	1.30289e-06	2.7469	-4.643	1.30289e-06	2.7469	-3.7427	1.30289e-06	2.75252
RPL27	-4.1946	1.30289e-06	2.37315	-4.1352	1.30289e-06	2.27663	-4.5606	1.30289e-06	2.60642	-4.9715	1.30289e-06	2.53298	-4.5606	1.30289e-06	2.7469	-4.2529	1.30289e-06	2.78252
PRPF38A	-4.3507	1.30289e-06	1.77214	-5.0624	1.30289e-06	1.42426	-4.2387	1.30289e-06	2.08656	-4.7849	1.30289e-06	2.53298	-4.7267	1.30289e-06	2.7469	-4.0888	1.30289e-06	2.75252
THOC5	-3.353	1.30289e-06	2.86614	-4.1475	1.30289e-06	2.85824	-2.4671	1.30289e-06	2.35783	-2.2893	1.30289e-06	2.42748	-4.3351	1.30289e-06	2.7469	-2.2924	1.30289e-06	2.53313
NUDT21	-3.3506	1.30289e-06	2.53313	-4.4354	1.30289e-06	2.85636	-5.5198	1.30289e-06	2.72033	-5.1067	1.30289e-06	2.34199	-4.5887	1.30289e-06	2.7469	-3.4495	1.30289e-06	2.54607
WDR12	-2.4077	1.30289e-06	2.41987	-3.3484	1.30289e-06	2.83476	-3.6885	1.30289e-06	2.76904	-4.1609	1.30289e-06	2.82016	-3.7789	1.30289e-06	2.7469	-3.1933	1.30289e-06	2.78252
RUVBL1	-3.108	1.30289e-06	2.86614	-5.5603	1.30289e-06	2.85824	-4.0083	1.30289e-06	2.76904	-5.4921	1.30289e-06	2.78252	-4.4617	1.30289e-06	2.7469	-4.1543	1.30289e-06	2.78252
XAB2	-3.1733	1.30289e-06	2.76271	-4.0701	1.30289e-06	2.79915	-4.3343	1.30289e-06	2.48466	-3.6184	1.30289e-06	2.63979	-3.5679	1.30289e-06	2.7469	-2.5174	1.30289e-06	2.52143
NSMCE2	-1.7994	1.30289e-06	1.65269	-1.9688	1.30289e-06	2.03395	-1.5714	1.30289e-06	1.9692	-1.787	1.30289e-06	2.26922	-1.9281	1.30289e-06	2.64264	-1.5805	1.30289e-06	1.73245
EIF4A3	-3.8329	1.30289e-06	1.71598	-3.8959	1.30289e-06	1.72296	-4.5282	1.30289e-06	2.76904	-4.3823	1.30289e-06	2.78252	-4.2644	1.30289e-06	2.64264	-3.5282	1.30289e-06	2.78252
RPL19	-3.2296	1.30289e-06	2.09366	-4.621	1.30289e-06	2.55517	-3.1658	1.30289e-06	2.48466	-5.0396	1.30289e-06	2.53298	-4.415	1.30289e-06	2.64264	-4.2211	1.30289e-06	2.45149
RPL18	-3.4461	1.30289e-06	2.4725	-5.5429	1.30289e-06	2.70708	-3.6156	1.30289e-06	1.91009	-4.3939	1.30289e-06	2.42748	-4.5792	1.30289e-06	2.59007	-4.0163	1.30289e-06	2.78252
AL713997.1	-4.1133	1.30289e-06	2.86614	-3.8558	1.30289e-06	2.85824	-5.1589	1.30289e-06	2.5367	-5.8256	1.30289e-06	2.82016	-5.5409	1.30289e-06	2.59007	-5.1051	1.30289e-06	2.60642
RPL34	-2.9309	1.30289e-06	2.4973	-3.9252	1.30289e-06	2.85824	-3.374	1.30289e-06	2.45051	-5.2563	1.30289e-06	2.53298	-4.2858	1.30289e-06	2.57528	-3.8602	1.30289e-06	2.53313
PSMC4	-2.2349	1.30289e-06	2.15764	-3.0943	1.30289e-06	1.3491	-2.793	1.30289e-06	2.1346	-3.3839	1.30289e-06	1.03621	-3.5961	1.30289e-06	2.57528	-3.0202	1.30289e-06	2.35154
EIF3D	-1.9273	1.30289e-06	1.83911	-2.5176	1.30289e-06	2.27992	-1.1123	1.30289e-06	1.05596	-3.6159	1.30289e-06	2.82016	-2.3525	1.30289e-06	2.54424	-1.6731	1.30289e-06	2.12182
MED21	-2.0533	1.30289e-06	2.30539	-3.6361	1.30289e-06	1.61473	-2.3516	1.30289e-06	2.45051	-1.7644	1.30289e-06	2.10095	-3.5886	1.30289e-06	2.54424	-1.9387	1.30289e-06	2.35154
SRSF3	-3.1009	1.30289e-06	1.15557	-4.1894	1.30289e-06	1.53943	-3.3303	1.30289e-06	2.35783	-4.5516	1.30289e-06	2.82016	-4.0464	1.30289e-06	2.54424	-3.4309	1.30289e-06	2.78252
MSTO1	-1.3278	1.30289e-06	1.142	-3.7813	1.30289e-06	1.315	-3.3924	1.30289e-06	1.82481	-4.937	1.30289e-06	2.53298	-3.8598	1.30289e-06	2.54424	-3.6695	1.30289e-06	2.39373
RPS6	-2.2169	1.30289e-06	1.30319	-4.4636	1.30289e-06	1.37377	-3.9703	1.30289e-06	1.27168	-5.0357	1.30289e-06	2.36381	-4.6753	1.30289e-06	2.54424	-3.3655	1.30289e-06	2.45149
RPLP0	-3.0523	1.30289e-06	2.86614	-5.4682	1.30289e-06	2.83476	-4.562	1.30289e-06	2.48466	-5.2842	1.30289e-06	2.51159	-4.5854	1.30289e-06	2.54424	-4.0413	1.30289e-06	2.52143
RRM1	-5.0361	1.30289e-06	2.41987	-4.9558	1.30289e-06	2.55517	-5.0197	1.30289e-06	1.63886	-5.665	1.30289e-06	2.53298	-4.2801	1.30289e-06	2.54424	-4.3463	1.30289e-06	2.7597
PRPF19	-3.9362	1.30289e-06	1.82074	-4.7348	1.30289e-06	2.30539	-4.71	1.30289e-06	2.48466	-5.4662	1.30289e-06	2.41162	-4.3524	1.30289e-06	2.54424	-4.0336	1.30289e-06	2.52143
URI1	-1.7157	1.30289e-06	2.4973	-1.2559	1.30289e-06	2.19887	-1.9351	1.30289e-06	2.33273	-1.3552	1.30289e-06	1.36367	-1.6168	1.30289e-06	2.54424	-1.8253	1.30289e-06	2.3974
HEATR1	-2.9236	1.30289e-06	2.60642	-5.1159	1.30289e-06	2.85636	-2.5847	1.30289e-06	2.48466	-2.915	1.30289e-06	2.53298	-3.8623	1.30289e-06	2.54424	-1.6205	1.30289e-06	2.3267
SEC22B	-3.5859	1.30289e-06	2.4973	-4.5301	1.30289e-06	2.41094	-4.0698	1.30289e-06	2.48466	-2.1763	1.30289e-06	2.36381	-2.9589	1.30289e-06	2.54424	-2.8452	1.30289e-06	2.41454
RP11-26N15.2	-6.0053	1.30289e-06	2.4973	-5.3517	1.30289e-06	2.55517	-5.8768	1.30289e-06	2.45051	-5.5748	1.30289e-06	2.4603	-5.5001	1.30289e-06	2.54424	-4.9756	1.30289e-06	2.52143
ORAOV1	-3.4246	1.30289e-06	2.34056	-3.6075	1.30289e-06	2.73142	-4.9987	1.30289e-06	2.76904	-5.1082	1.30289e-06	3.20831	-3.0356	1.30289e-06	2.54424	-2.9521	1.30289e-06	2.78252
EFTUD2	-2.2178	1.30289e-06	1.97997	-3.7166	1.30289e-06	2.4443	-3.6407	1.30289e-06	2.48452	-4.0083	1.30289e-06	2.53298	-3.4035	1.30289e-06	2.54424	-1.9815	1.30289e-06	2.04857
DNM2	-1.1158	1.30289e-06	1.97082	-0.34074	1.30289e-06	0.330121	-1.4505	1.30289e-06	1.79409	-1.4487	1.30289e-06	1.41134	-3.5966	1.30289e-06	2.54424	-1.9685	1.30289e-06	1.63476
VPS51	-1.7476	1.30289e-06	2.41987	-1.9243	1.30289e-06	2.30945	-2.035	1.30289e-06	1.73302	-2.0416	1.30289e-06	2.41386	-2.4117	1.30289e-06	2.54424	-2.9358	1.30289e-06	2.45149
AC004812.1	-4.6589	1.30289e-06	2.86614	-3.9881	1.30289e-06	2.85824	-5.7574	1.30289e-06	2.45051	-5.8387	1.30289e-06	2.4603	-5.6653	1.30289e-06	2.54424	-5.3597	1.30289e-06	2.52143
PRPF31	-2.9285	1.30289e-06	2.86614	-3.6882	1.30289e-06	2.81051	-2.6193	1.30289e-06	1.60066	-2.9847	1.30289e-06	2.53298	-2.5458	1.30289e-06	2.54424	-2.8167	1.30289e-06	2.26249
EIF3G	-2.5828	1.30289e-06	1.61919	-3.3213	1.30289e-06	1.68392	-2.0274	1.30289e-06	2.16165	-2.8319	1.30289e-06	2.42748	-3.1643	1.30289e-06	2.54424	-2.3785	1.30289e-06	2.35067
RPS18	-3.1614	1.30289e-06	2.63639	-5.268	1.30289e-06	2.55517	-4.4476	1.30289e-06	2.41341	-4.8507	1.30289e-06	2.40318	-4.7076	1.30289e-06	2.54424	-4.1137	1.30289e-06	2.48413
RPS8	-4.4503	1.30289e-06	2.4973	-5.1215	1.30289e-06	2.85824	-5.4579	1.30289e-06	2.48466	-5.1871	1.30289e-06	2.5236	-4.8992	1.30289e-06	2.54424	-3.9296	1.30289e-06	2.52143
PSMB2	-2.8083	1.30289e-06	2.31912	-3.1699	1.30289e-06	2.81051	-3.7817	1.30289e-06	2.41341	-4.6794	1.30289e-06	2.82016	-3.1297	1.30289e-06	2.54424	-2.5836	1.30289e-06	2.06829
RPS24	-2.9773	1.30289e-06	2.4973	-4.2318	1.30289e-06	2.55517	-2.7216	1.30289e-06	2.48466	-4.2933	1.30289e-06	2.42748	-3.8186	1.30289e-06	2.54424	-2.4568	1.30289e-06	2.52143
RP11-357N13.3	-5.0057	1.30289e-06	2.54607	-4.4657	1.30289e-06	2.57922	-5.5832	1.30289e-06	2.45051	-5.7819	1.30289e-06	2.42748	-5.5761	1.30289e-06	2.54424	-4.7845	1.30289e-06	2.45149
NUP205	-1.9989	1.30289e-06	2.48452	-3.1513	1.30289e-06	2.81051	-1.899	1.30289e-06	2.40727	-2.3747	1.30289e-06	2.53298	-2.3885	1.30289e-06	2.54166	-2.0175	1.30289e-06	2.45149
SNRPD2	-3.391	1.30289e-06	2.86614	-4.8769	1.30289e-06	2.85824	-4.9913	1.30289e-06	2.60642	-5.5568	1.30289e-06	2.77263	-4.896	1.30289e-06	2.54166	-3.654	1.30289e-06	2.63639
KARS	-4.4428	1.30289e-06	2.00261	-3.798	1.30289e-06	2.16794	-5.0188	1.30289e-06	2.72033	-4.9957	1.30289e-06	2.18649	-4.439	1.30289e-06	2.54166	-4.1921	1.30289e-06	2.45149
RPS13	-3.8199	1.30289e-06	2.41987	-3.8268	1.30289e-06	2.55517	-4.191	1.30289e-06	2.45051	-5.0883	1.30289e-06	2.42748	-4.1287	1.30289e-06	2.5394	-3.8168	1.30289e-06	2.52143
CHMP6	-2.6281	1.30289e-06	2.01655	-3.3996	1.30289e-06	2.17613	-3.0907	1.30289e-06	2.2146	-1.8826	1.30289e-06	2.20957	-3.1873	1.30289e-06	2.5394	-2.52	1.30289e-06	1.28147
RPS15	-1.6306	1.30289e-06	1.81716	-3.6251	1.30289e-06	2.03744	-3.9001	1.30289e-06	2.44672	-4.6548	1.30289e-06	2.4603	-4.9223	1.30289e-06	2.5394	-3.0738	1.30289e-06	2.52143
RPS11	-3.3057	1.30289e-06	2.4973	-4.5835	1.30289e-06	2.79915	-4.2763	1.30289e-06	2.41341	-5.2649	1.30289e-06	2.53298	-3.3334	1.30289e-06	2.53224	-3.6349	1.30289e-06	2.52143
MYC	-2.8026	1.30289e-06	2.4973	-3.0391	1.30289e-06	2.48413	-2.7205	1.30289e-06	2.18409	-2.8424	1.30289e-06	2.33989	-3.891	1.30289e-06	2.53224	-4.3298	1.30289e-06	2.51414
IPO9	-0.62488	1.30289e-06	1.142	-1.1508	1.30289e-06	1.7101	-1.1066	1.30289e-06	1.88786	-1.4552	1.30289e-06	2.33989	-1.8756	1.30289e-06	2.52057	-1.1537	1.30289e-06	1.7716
PRPF8	-2.7953	1.30289e-06	3.08355	-3.9288	1.30289e-06	3.25964	-4.6813	1.30289e-06	2.76904	-3.6157	1.30289e-06	2.82016	-2.8007	1.30289e-06	2.50948	-2.6294	1.30289e-06	2.78252
RPL12	-3.3943	1.30289e-06	2.4973	-3.76	1.30289e-06	2.85636	-3.3764	1.30289e-06	2.48466	-4.8837	1.30289e-06	2.82016	-3.8513	1.30289e-06	2.4988	-3.8562	1.30289e-06	2.52143
RP11-353N14.2	-5.9567	1.30289e-06	2.17751	-5.6837	1.30289e-06	2.79915	-5.8283	1.30289e-06	2.42262	-5.9494	1.30289e-06	2.40132	-5.6446	1.30289e-06	2.48879	-5.4848	1.30289e-06	2.50724
PSMD6	-2.3499	1.30289e-06	1.25105	-4.3873	1.30289e-06	2.43545	-2.5843	1.30289e-06	2.25173	-4.0409	1.30289e-06	2.40132	-3.075	1.30289e-06	2.48852	-2.2887	1.30289e-06	2.37417
ARPC2	-1.008	1.30289e-06	1.8717	-2.0571	1.30289e-06	2.529	-1.4871	1.30289e-06	2.33273	-1.782	1.30289e-06	1.30297	-2.4383	1.30289e-06	2.48852	-1.838	1.30289e-06	2.31903
UBA52	-1.8999	1.30289e-06	1.20569	-4.0778	1.30289e-06	2.55517	-4.0102	1.30289e-06	2.45051	-3.7043	1.30289e-06	2.33989	-3.2915	1.30289e-06	2.47912	-4.1023	1.30289e-06	2.41454
RPL11	-3.3841	1.30289e-06	2.86614	-4.6257	1.30289e-06	2.83476	-4.1418	1.30289e-06	2.41341	-4.5018	1.30289e-06	2.33989	-5.126	1.30289e-06	2.47018	-3.4298	1.30289e-06	2.32267
DDX18	-1.4862	1.30289e-06	1.83911	-1.8468	1.30289e-06	1.12169	-1.372	1.30289e-06	2.04058	-2.96	1.30289e-06	2.03372	-2.5218	1.30289e-06	2.45333	-1.703	1.30289e-06	1.55415
HNRNPC	-4.6311	1.30289e-06	2.22286	-5.1524	1.30289e-06	2.15212	-4.5316	1.30289e-06	2.76904	-5.6801	1.30289e-06	2.53298	-4.6278	1.30289e-06	2.45333	-4.0625	1.30289e-06	1.54731
SNRNP200	-4.1524	1.30289e-06	2.86614	-4.3761	1.30289e-06	2.55517	-4.1135	1.30289e-06	2.45051	-5.2272	1.30289e-06	1.85143	-4.2074	1.30289e-06	2.44527	-4.0228	1.30289e-06	2.52143
QARS	-3.3087	1.30289e-06	1.83911	-5.2849	1.30289e-06	1.59447	-4.2156	1.30289e-06	2.48452	-3.8105	1.30289e-06	1.76298	-3.6677	1.30289e-06	2.44418	-3.3903	1.30289e-06	2.50724
FARSA	-2.1698	1.30289e-06	1.1563	-2.3375	1.30289e-06	2.05488	-2.6043	1.30289e-06	2.37551	-4.9126	1.30289e-06	2.34256	-2.1793	1.30289e-06	2.44418	-3.0076	1.30289e-06	2.32267
RAD51C	-1.6381	1.30289e-06	2.3397	-2.3584	1.30289e-06	2.32221	-3.9513	1.30289e-06	2.45051	-1.8747	1.30289e-06	1.98569	-2.6245	1.30289e-06	2.44418	-2.4869	1.30289e-06	2.52143
PSMD1	-0.57059	1.30289e-06	1.06194	-0.87816	1.30289e-06	1.20767	-1.914	1.30289e-06	2.41341	-1.9172	1.30289e-06	2.42748	-1.5389	1.30289e-06	2.44418	-1.4971	1.30289e-06	2.40528
RBX1	-2.3055	1.30289e-06	2.4973	-1.9699	1.30289e-06	2.41094	-3.3895	1.30289e-06	2.48452	-4.5006	1.30289e-06	2.36381	-2.3284	1.30289e-06	2.44418	-2.9077	1.30289e-06	2.28946
RPL10A	-1.6797	1.30289e-06	1.70266	-2.3773	1.30289e-06	1.61422	-2.7343	1.30289e-06	2.44672	-2.6452	1.30289e-06	2.2324	-2.3962	1.30289e-06	2.44418	-1.9316	1.30289e-06	2.52143
NEDD8	-3.8167	1.30289e-06	2.4973	-5.7116	1.30289e-06	2.85511	-5.066	1.30289e-06	2.45051	-5.6139	1.30289e-06	2.42748	-3.8598	1.30289e-06	2.44418	-3.2626	1.30289e-06	2.45149
POLR2I	-5.1974	1.30289e-06	2.53313	-4.5643	1.30289e-06	2.01493	-3.9771	1.30289e-06	2.39556	-3.912	1.30289e-06	2.39946	-4.4336	1.30289e-06	2.44418	-5.1485	1.30289e-06	2.52143
RPL3	-3.8702	1.30289e-06	2.76271	-4.7545	1.30289e-06	2.83476	-3.5403	1.30289e-06	2.34094	-4.8772	1.30289e-06	2.53298	-4.1606	1.30289e-06	2.4262	-4.1241	1.30289e-06	1.73091
POLR3C	-2.0917	1.30289e-06	2.33894	-2.3441	1.30289e-06	2.12396	-3.608	1.30289e-06	2.4383	-2.3172	1.30289e-06	1.79727	-3.2008	1.30289e-06	2.42125	-4.1302	1.30289e-06	2.41454
RPL37A	-2.6062	1.30289e-06	1.82824	-3.2496	1.30289e-06	2.79915	-4.3395	1.30289e-06	2.0882	-4.8813	1.30289e-06	2.65956	-4.2026	1.30289e-06	2.42125	-3.6231	1.30289e-06	2.52143
DNAJA3	-1.7883	1.30289e-06	2.41987	-2.2707	1.30289e-06	2.30539	-3.2594	1.30289e-06	2.48466	-4.357	1.30289e-06	2.82016	-1.868	1.30289e-06	2.42125	-2.0793	1.30289e-06	2.52143
VCP	-4.4828	1.30289e-06	2.4973	-4.9172	1.30289e-06	2.37592	-5.3465	1.30289e-06	2.39556	-5.2448	1.30289e-06	2.35448	-4.1982	1.30289e-06	2.42125	-3.444	1.30289e-06	2.2053
SPC24	-2.7977	1.30289e-06	2.34824	-2.5775	1.30289e-06	2.19887	-4.218	1.30289e-06	2.45506	-3.446	1.30289e-06	2.40318	-2.126	1.30289e-06	2.38605	-1.5968	1.30289e-06	2.00833
RPL13	-2.7752	1.30289e-06	2.28075	-4.9527	1.30289e-06	1.61473	-3.0433	1.30289e-06	1.96313	-4.4532	1.30289e-06	2.11691	-5.1812	1.30289e-06	2.3807	-4.0279	1.30289e-06	2.12182
SMC3	-0.964	1.30289e-06	1.20881	-1.0387	1.30289e-06	1.25222	-2.0003	1.30289e-06	2.76904	-1.6444	1.30289e-06	2.56992	-1.6618	1.30289e-06	2.33236	-1.5638	1.30289e-06	2.52143
CHD4	-2.8479	1.30289e-06	1.8629	-1.7718	1.30289e-06	0.827499	-1.7422	1.30289e-06	2.33273	-2.2197	1.30289e-06	2.10095	-2.9885	1.30289e-06	2.33236	-2.7794	1.30289e-06	2.12182
TIMM10	-3.0491	1.30289e-06	2.34056	-4.3415	1.30289e-06	1.6482	-3.9223	1.30289e-06	2.37417	-4.5225	1.30289e-06	2.27712	-4.4651	1.30289e-06	2.33236	-3.3307	1.30289e-06	2.41454
DYNC1H1	-2.0012	1.30289e-06	2.31912	-3.3142	1.30289e-06	2.37592	-3.2984	1.30289e-06	2.41341	-3.5246	1.30289e-06	2.36381	-3.3312	1.30289e-06	2.32818	-1.9841	1.30289e-06	1.7716
AQR	-3.0574	1.30289e-06	2.41987	-5.2344	1.30289e-06	2.55517	-4.0277	1.30289e-06	2.35783	-3.4566	1.30289e-06	2.35863	-3.1949	1.30289e-06	2.3165	-2.5354	1.30289e-06	2.30865
PRPF3	-1.7287	1.30289e-06	2.76271	-3.3444	1.30289e-06	2.85511	-1.0638	1.30289e-06	2.24934	-2.3015	1.30289e-06	2.5236	-1.6097	1.30289e-06	2.29826	-1.6881	1.30289e-06	2.03362
MAEA	-1.5299	1.30289e-06	1.83115	-2.5343	1.30289e-06	2.39137	-1.5454	1.30289e-06	1.91464	-2.0895	1.30289e-06	2.33989	-2.464	1.30289e-06	2.29826	-2.2055	1.30289e-06	2.33059
EIF3I	-3.3543	1.30289e-06	2.4973	-5.0483	1.30289e-06	2.62819	-4.5551	1.30289e-06	2.45051	-5.3152	1.30289e-06	2.40938	-4.4174	1.30289e-06	2.29826	-3.3223	1.30289e-06	2.52143
PPP1CB	-1.5551	1.30289e-06	1.30357	-3.478	1.30289e-06	1.87491	-2.665	1.30289e-06	2.45051	-3.5223	1.30289e-06	2.7469	-2.875	1.30289e-06	2.29482	-3.0378	1.30289e-06	2.71829
RPS9	-3.3892	1.30289e-06	2.3397	-4.4861	1.30289e-06	2.33143	-5.0146	1.30289e-06	2.41341	-5.4777	1.30289e-06	2.41162	-3.2212	1.30289e-06	2.29149	-3.9259	1.30289e-06	2.48413
ECT2	-3.8301	1.30289e-06	2.30539	-2.4795	1.30289e-06	0.920974	-3.7167	1.30289e-06	2.21268	-1.6169	1.30289e-06	0.86454	-4.327	1.30289e-06	2.21983	-3.8871	1.30289e-06	1.45973
TOMM70	-1.1149	1.30289e-06	1.42561	-1.3447	1.30289e-06	1.31101	-3.1065	1.30289e-06	2.76904	-1.3537	1.30289e-06	1.52337	-1.1692	1.30289e-06	2.20635	-0.81846	1.30289e-06	1.21061
RPN2	-1.7105	1.30289e-06	1.90609	-2.5205	1.30289e-06	2.30539	-1.8046	1.30289e-06	1.69804	-2.2874	1.30289e-06	1.43279	-4.0442	1.30289e-06	2.20433	-2.2562	1.30289e-06	1.60324
DDX10	-2.219	1.30289e-06	2.27704	-2.5648	1.30289e-06	2.81051	-2.7246	1.30289e-06	2.25987	-3.0693	1.30289e-06	2.5236	-3.5375	1.30289e-06	2.19695	-2.6398	1.30289e-06	2.41454
INTS9	-3.8648	1.30289e-06	2.34218	-4.5083	1.30289e-06	2.30539	-4.1451	1.30289e-06	2.45051	-5.4376	1.30289e-06	2.53298	-4.4212	1.30289e-06	2.17954	-3.739	1.30289e-06	1.87034
RPL32	-2.4154	1.30289e-06	2.41987	-2.5355	1.30289e-06	2.85824	-1.9785	1.30289e-06	1.85774	-3.5071	1.30289e-06	2.18649	-3.239	1.30289e-06	2.1779	-2.8081	1.30289e-06	2.40528
PSMD7	-2.0123	1.30289e-06	1.06373	-2.1311	1.30289e-06	1.15396	-1.3405	1.30289e-06	1.82481	-3.3914	1.30289e-06	2.06875	-3.1773	1.30289e-06	2.1698	-2.4544	1.30289e-06	1.11432
SART3	-3.4427	1.30289e-06	2.41987	-3.8539	1.30289e-06	2.85511	-2.799	1.30289e-06	2.06374	-1.8927	1.30289e-06	2.20957	-3.1794	1.30289e-06	2.1698	-2.8367	1.30289e-06	1.24042
RPL6	-1.4453	1.30289e-06	1.15654	-2.7685	1.30289e-06	2.29022	-2.8105	1.30289e-06	2.14484	-3.3835	1.30289e-06	2.63979	-4.0417	1.30289e-06	2.16349	-3.0405	1.30289e-06	2.52143
ELL	-2.7369	1.30289e-06	1.71456	-2.106	1.30289e-06	1.90351	-2.1205	1.30289e-06	2.48466	-1.7899	1.30289e-06	2.36381	-1.3349	1.30289e-06	2.14819	-1.8402	1.30289e-06	2.14789
PSMA1	-1.3493	1.30289e-06	1.15557	-1.7527	1.30289e-06	2.55517	-1.9847	1.30289e-06	2.33273	-4.0221	1.30289e-06	2.82016	-2.2217	1.30289e-06	2.14243	-1.4963	1.30289e-06	2.52143
RPS27A	-2.1844	1.30289e-06	2.05046	-1.9908	1.30289e-06	1.99123	-2.9315	1.30289e-06	2.38998	-3.4336	1.30289e-06	2.35863	-2.3736	1.30289e-06	2.14122	-3.0255	1.30289e-06	2.45149
GCN1	-1.0185	1.30289e-06	2.09366	-0.49083	1.30289e-06	0.802606	-1.8803	1.30289e-06	2.04125	-0.83964	1.30289e-06	1.09512	-2.2203	1.30289e-06	2.14002	-1.5586	1.30289e-06	1.96642
SHFM1	-1.782	1.30289e-06	1.42857	-2.5056	1.30289e-06	1.59447	-1.9395	1.30289e-06	2.35783	-2.3002	1.30289e-06	2.53298	-3.0936	1.30289e-06	2.11368	-2.5675	1.30289e-06	2.08181
RP11-13J8.1	-5.0657	1.30289e-06	2.4973	-4.5595	1.30289e-06	2.32221	-5.6964	1.30289e-06	2.35783	-5.8121	1.30289e-06	2.34256	-4.774	1.30289e-06	2.11278	-4.701	1.30289e-06	2.40771
RPLP2	-2.0164	1.30289e-06	1.45679	-3.6525	1.30289e-06	2.3362	-2.4918	1.30289e-06	1.95086	-3.6317	1.30289e-06	2.10095	-2.98	1.30289e-06	2.0962	-2.6655	1.30289e-06	1.68973
DDX46	-3.086	1.30289e-06	2.33894	-3.9666	1.30289e-06	1.25222	-4.3611	1.30289e-06	2.48466	-3.4976	1.30289e-06	1.90441	-3.5694	1.30289e-06	2.07676	-2.2531	1.30289e-06	2.22988
LSM6	-2.0253	1.30289e-06	2.41987	-4.8883	1.30289e-06	2.85636	-3.4128	1.30289e-06	2.14382	-4.9803	1.30289e-06	2.36381	-2.5515	1.30289e-06	2.06895	-2.4526	1.30289e-06	1.37086
COPA	-3.2984	1.30289e-06	1.8341	-3.9229	1.30289e-06	2.1359	-3.3793	1.30289e-06	1.89531	-3.5044	1.30289e-06	2.33989	-4.4268	1.30289e-06	2.06849	-1.8995	1.30289e-06	2.30539
LSM4	-2.5865	1.30289e-06	1.60401	-4.5498	1.30289e-06	2.37592	-4.0716	1.30289e-06	1.94935	-4.9853	1.30289e-06	2.4603	-4.2474	1.30289e-06	2.03419	-3.7204	1.30289e-06	2.05497
CTDNEP1	-0.52718	1.30289e-06	0.230926	-2.3615	1.30289e-06	1.55021	-0.86189	1.30289e-06	1.12476	-0.51697	1.30289e-06	0.734018	-2.5437	1.30289e-06	2.03395	-2.5038	1.30289e-06	2.16948
RPS5	-1.6023	1.30289e-06	2.15764	-2.0259	1.30289e-06	2.55517	-1.6938	1.30289e-06	2.41341	-3.523	1.30289e-06	2.53298	-2.2947	1.30289e-06	2.03376	-1.8578	1.30289e-06	2.39556
DDX51	-0.89907	1.30289e-06	0.45232	-2.2061	1.30289e-06	1.04261	-3.8807	1.30289e-06	2.41341	-3.3496	1.30289e-06	1.81192	-2.3048	1.30289e-06	2.02724	-2.1686	1.30289e-06	2.19688
RP5-1022P6.5	-5.1286	1.30289e-06	1.44614	-5.9932	1.30289e-06	1.34195	-5.83	1.30289e-06	1.9846	-5.9708	1.30289e-06	1.96533	-5.6122	1.30289e-06	2.02692	-5.4274	1.30289e-06	2.14789
EIF3H	-1.4542	1.30289e-06	1.35638	-1.7806	1.30289e-06	1.80911	-1.6153	1.30289e-06	1.81149	-2.4473	1.30289e-06	2.28525	-2.4879	1.30289e-06	2.02692	-2.0241	1.30289e-06	1.97074
DDB1	-3.6735	1.30289e-06	1.64969	-3.544	1.30289e-06	1.70759	-2.8219	1.30289e-06	2.08656	-3.3511	1.30289e-06	2.42748	-2.7841	1.30289e-06	2.02063	-2.8383	1.30289e-06	1.85933
XRCC5	-1.5879	1.30289e-06	1.77214	-1.9866	1.30289e-06	1.36525	-3.2393	1.30289e-06	2.34094	-2.2802	1.30289e-06	1.66266	-2.8515	1.30289e-06	2.01457	-2.752	1.30289e-06	2.45149
DYNC1I2	-0.90019	1.30289e-06	1.39938	-2.0393	1.30289e-06	1.25391	-2.1766	1.30289e-06	2.18257	-2.5843	1.30289e-06	2.2304	-1.4451	1.30289e-06	1.99719	-0.96853	1.30289e-06	1.67815
SYMPK	-1.575	1.30289e-06	2.01646	-1.071	1.30289e-06	1.25905	-2.5298	1.30289e-06	1.27296	-3.0616	1.30289e-06	1.30109	-1.4541	1.30289e-06	1.98068	-1.8662	1.30289e-06	2.23747
NAPA	-2.6197	1.30289e-06	1.14423	-3.9247	1.30289e-06	1.56379	-4.1337	1.30289e-06	2.45051	-3.745	1.30289e-06	2.53298	-4.5563	1.30289e-06	1.97831	-2.9156	1.30289e-06	1.76498
PSMC2	-1.9946	1.30289e-06	1.66065	-3.0971	1.30289e-06	1.82734	-2.1231	1.30289e-06	1.39454	-3.0269	1.30289e-06	1.29397	-4.1573	1.30289e-06	1.97831	-1.893	1.30289e-06	1.29132
COPZ1	-2.2595	1.30289e-06	1.35638	-3.09	1.30289e-06	2.13472	-2.2784	1.30289e-06	1.85774	-2.3735	1.30289e-06	2.20957	-2.5131	1.30289e-06	1.97584	-2.0325	1.30289e-06	1.11855
NPAT	-0.74677	1.30289e-06	0.684792	-0.86735	1.30289e-06	0.816434	-0.76945	1.30289e-06	0.824711	-0.7201	1.30289e-06	0.364082	-1.3809	1.30289e-06	1.96827	-0.91653	1.30289e-06	1.27561
CSE1L	-2.0436	1.30289e-06	2.86614	-2.6493	1.30289e-06	2.41375	-2.544	1.30289e-06	2.76904	-4.0183	1.30289e-06	2.77263	-1.53	1.30289e-06	1.93464	-1.6118	1.30289e-06	2.75252
IRF2	0.37228	1.30289e-06	1.30289e-06	0.26886	1.30289e-06	1.30289e-06	-0.61789	1.30289e-06	0.668883	0.19185	1.30289e-06	1.30289e-06	-3.2257	1.30289e-06	1.93464	-1.1456	1.30289e-06	0.800651
KANSL1	-1.6525	1.30289e-06	2.86614	-1.8736	1.30289e-06	3.25964	-1.8342	1.30289e-06	2.48466	-0.92594	1.30289e-06	1.74851	-0.6707	1.30289e-06	1.92581	-0.9941	1.30289e-06	1.94958
PMF1	-2.8634	1.30289e-06	1.60401	-2.6365	1.30289e-06	1.63285	-2.8749	1.30289e-06	1.51302	-2.3517	1.30289e-06	1.82339	-1.4567	1.30289e-06	1.91952	-2.8892	1.30289e-06	2.32267
DHFR	-0.38034	1.30289e-06	0.028534	-0.55667	1.30289e-06	1.30289e-06	-1.7688	1.30289e-06	1.80701	-0.42766	1.30289e-06	0.250789	-0.96996	1.30289e-06	1.91375	-1.3222	1.30289e-06	1.16344
ATXN10	-1.6012	1.30289e-06	2.22286	-1.0014	1.30289e-06	1.61138	-2.3989	1.30289e-06	2.21653	-2.0823	1.30289e-06	2.16071	-1.4488	1.30289e-06	1.91375	-1.5412	1.30289e-06	1.56309
DRAP1	-0.56699	1.30289e-06	0.504224	-0.32329	1.30289e-06	0.0376027	-1.678	1.30289e-06	1.10132	-0.32019	1.30289e-06	0.154131	-1.0463	1.30289e-06	1.91375	-0.96602	1.30289e-06	1.97074
DHPS	-2.2877	1.30289e-06	1.24574	-2.9024	1.30289e-06	2.29388	-4.336	1.30289e-06	2.31194	-4.4513	1.30289e-06	2.28525	-2.9914	1.30289e-06	1.91375	-2.9386	1.30289e-06	1.89932
BRIX1	-0.94966	1.30289e-06	1.11975	-1.7171	1.30289e-06	1.87228	-1.6731	1.30289e-06	2.05502	-2.5408	1.30289e-06	1.41524	-1.2542	1.30289e-06	1.91375	-2.0054	1.30289e-06	2.19321
PFDN2	-3.1817	1.30289e-06	1.28632	-4.1546	1.30289e-06	1.77034	-3.1126	1.30289e-06	1.92347	-4.5218	1.30289e-06	1.76155	-4.5413	1.30289e-06	1.89674	-2.9417	1.30289e-06	1.89609
RPS15A	-1.2232	1.30289e-06	1.22665	-2.5399	1.30289e-06	1.41919	-3.999	1.30289e-06	1.88786	-4.3417	1.30289e-06	1.84469	-3.0864	1.30289e-06	1.89674	-3.5605	1.30289e-06	1.92698
RPSA	-2.1537	1.30289e-06	0.902847	-3.1371	1.30289e-06	2.19887	-3.6978	1.30289e-06	2.15571	-4.4506	1.30289e-06	2.21925	-2.6092	1.30289e-06	1.89674	-2.1532	1.30289e-06	1.7716
NSF	-2.4103	1.30289e-06	1.7922	-3.3541	1.30289e-06	1.30941	-4.275	1.30289e-06	2.18555	-2.8958	1.30289e-06	1.68254	-3.7497	1.30289e-06	1.874	-2.9519	1.30289e-06	1.70695
CFLAR	-0.93977	1.30289e-06	0.658981	-0.53771	1.30289e-06	0.142241	-1.5218	1.30289e-06	1.2807	0.075722	1.30289e-06	1.30289e-06	-4.0714	1.30289e-06	1.87089	-3.9509	1.30289e-06	1.8911
CKS1B	-0.72689	1.30289e-06	0.621907	-2.5643	1.30289e-06	2.11873	-2.6989	1.30289e-06	2.35783	-2.0404	1.30289e-06	1.74851	-1.7756	1.30289e-06	1.8493	-1.183	1.30289e-06	1.84701
HAUS8	-1.9497	1.30289e-06	0.955954	-1.6074	1.30289e-06	0.778951	-1.806	1.30289e-06	0.816463	-3.695	1.30289e-06	0.761608	-2.1402	1.30289e-06	1.8493	-1.2147	1.30289e-06	0.756506
PIK3CA	-0.33039	1.30289e-06	1.30289e-06	-0.70004	1.30289e-06	0.425313	-0.76492	1.30289e-06	1.25201	-0.31231	1.30289e-06	1.30289e-06	-2.17	1.30289e-06	1.8493	-2.146	1.30289e-06	2.30865
RP11-360F5.1	-2.9868	1.30289e-06	2.28075	-2.7943	1.30289e-06	2.07676	-4.4133	1.30289e-06	2.04082	-4.3172	1.30289e-06	1.77671	-2.7118	1.30289e-06	1.8493	-2.1748	1.30289e-06	1.90595
PTPN23	-1.1112	1.30289e-06	1.19311	-0.76682	1.30289e-06	1.04889	-1.416	1.30289e-06	2.14588	-0.44132	1.30289e-06	0.394304	-1.2399	1.30289e-06	1.8493	-1.2901	1.30289e-06	1.23786
ZFP36L1	-0.17545	1.30289e-06	1.30289e-06	-0.084291	1.30289e-06	1.30289e-06	0.19179	1.30289e-06	1.30289e-06	0.069705	1.30289e-06	1.30289e-06	-1.5798	1.30289e-06	1.84832	-1.4189	1.30289e-06	1.86643
AC107993.1	-2.6118	1.30289e-06	1.77214	-2.2374	1.30289e-06	1.63954	-3.7446	1.30289e-06	2.08603	-4.5708	1.30289e-06	2.08255	-2.5027	1.30289e-06	1.84397	-2.6079	1.30289e-06	1.92332
SNRPE	-1.9374	1.30289e-06	1.49824	-3.2526	1.30289e-06	1.89103	-1.2172	1.30289e-06	1.36419	-3.2696	1.30289e-06	2.18649	-1.9999	1.30289e-06	1.83971	-2.5665	1.30289e-06	2.19321
RPS20	-3.7809	1.30289e-06	1.15654	-3.9877	1.30289e-06	0.917595	-2.9004	1.30289e-06	2.16165	-4.4179	1.30289e-06	2.36381	-5.0181	1.30289e-06	1.81633	-3.8744	1.30289e-06	2.40528
KPNB1	-4.4274	1.30289e-06	2.86614	-4.7371	1.30289e-06	3.25964	-4.5995	1.30289e-06	2.48466	-5.2871	1.30289e-06	2.42748	-3.3118	1.30289e-06	1.78851	-3.1632	1.30289e-06	2.44309
TARDBP	-0.69244	1.30289e-06	1.31157	-1.9976	1.30289e-06	2.37592	-1.8862	1.30289e-06	2.12662	-3.8803	1.30289e-06	2.65956	-1.0743	1.30289e-06	1.78749	-1.5749	1.30289e-06	2.41454
RPS3	-4.1176	1.30289e-06	0.612221	-4.0123	1.30289e-06	1.74975	-4.1914	1.30289e-06	1.74482	-4.9619	1.30289e-06	1.69999	-4.7213	1.30289e-06	1.78749	-4.5102	1.30289e-06	1.86034
RPL18A	-2.8722	1.30289e-06	0.72978	-3.5884	1.30289e-06	1.092	-2.6669	1.30289e-06	1.80209	-4.3387	1.30289e-06	2.67325	-3.768	1.30289e-06	1.76739	-2.706	1.30289e-06	1.57303
PPP2R1A	-1.6024	1.30289e-06	1.51986	-2.9814	1.30289e-06	1.94474	-2.9817	1.30289e-06	2.48466	-4.4697	1.30289e-06	2.53298	-2.3803	1.30289e-06	1.76566	-2.0645	1.30289e-06	1.81719
SUPV3L1	-1.8667	1.30289e-06	1.8663	-1.2271	1.30289e-06	1.30173	-3.8112	1.30289e-06	2.76904	-1.6278	1.30289e-06	2.40318	-1.1365	1.30289e-06	1.76128	-0.82179	1.30289e-06	0.795742
ZNRD1	-1.5746	1.30289e-06	1.24465	-1.5123	1.30289e-06	1.45506	-1.6766	1.30289e-06	1.58697	-1.3608	1.30289e-06	0.745805	-2.2802	1.30289e-06	1.76095	-1.9383	1.30289e-06	1.73091
PSMB3	-4.2257	1.30289e-06	1.84285	-5.4046	1.30289e-06	2.37592	-5.2788	1.30289e-06	2.76904	-4.7722	1.30289e-06	2.82016	-5.3208	1.30289e-06	1.75279	-4.4685	1.30289e-06	2.40528
RPL7	-2.3197	1.30289e-06	2.05046	-3.3329	1.30289e-06	1.99123	-3.0165	1.30289e-06	2.41341	-4.6323	1.30289e-06	2.17973	-2.9345	1.30289e-06	1.74067	-3.1966	1.30289e-06	2.20719
SF3B3	-3.5893	1.30289e-06	2.28075	-3.7816	1.30289e-06	2.08103	-3.7223	1.30289e-06	2.16165	-3.9788	1.30289e-06	2.11691	-3.2803	1.30289e-06	1.74067	-3.0985	1.30289e-06	2.39373
ATR	-0.98854	1.30289e-06	0.638624	-0.87312	1.30289e-06	1.87228	-1.9256	1.30289e-06	2.15571	-1.5611	1.30289e-06	1.79727	-1.4105	1.30289e-06	1.74045	-1.1685	1.30289e-06	1.33809
COPS6	-2.5482	1.30289e-06	2.41987	-1.2815	1.30289e-06	1.15614	-1.8639	1.30289e-06	1.33515	-3.0582	1.30289e-06	1.22432	-2.1276	1.30289e-06	1.74007	-1.8386	1.30289e-06	1.97074
COASY	-0.73275	1.30289e-06	1.07695	-0.83107	1.30289e-06	1.00248	-3.9181	1.30289e-06	2.41341	-2.781	1.30289e-06	1.04598	-2.7246	1.30289e-06	1.74007	-1.1081	1.30289e-06	1.24754
RPS14	-4.1618	1.30289e-06	2.34056	-5.6405	1.30289e-06	1.98022	-4.4381	1.30289e-06	1.16754	-4.3729	1.30289e-06	1.47361	-5.157	1.30289e-06	1.71745	-3.213	1.30289e-06	1.30688
CTB-184G21.3	-3.528	1.30289e-06	1.82074	-3.2398	1.30289e-06	0.695001	-5.2431	1.30289e-06	1.92347	-5.676	1.30289e-06	2.40318	-5.4549	1.30289e-06	1.7128	-5.2007	1.30289e-06	2.05497
PDPK1	-2.2433	1.30289e-06	1.58926	-2.3925	1.30289e-06	1.38411	-1.5412	1.30289e-06	1.55304	-2.6296	1.30289e-06	1.44075	-3.2609	1.30289e-06	1.71159	-2.0158	1.30289e-06	1.46548
NOL7	-1.0106	1.30289e-06	1.77214	-1.1711	1.30289e-06	0.587239	-0.9874	1.30289e-06	0.810816	-0.56737	1.30289e-06	0.25757	-1.4486	1.30289e-06	1.71159	-0.98066	1.30289e-06	1.62353
DDX49	-1.6356	1.30289e-06	0.716812	-2.6651	1.30289e-06	1.37897	-2.2946	1.30289e-06	1.76721	-2.8602	1.30289e-06	1.74851	-2.2049	1.30289e-06	1.68776	-1.4706	1.30289e-06	1.32298
PAM16	0.067749	1.30289e-06	1.30289e-06	0.28614	1.30289e-06	1.30289e-06	-0.97831	1.30289e-06	1.06965	-1.9339	1.30289e-06	1.74851	-1.5044	1.30289e-06	1.67861	-0.73912	1.30289e-06	0.699098
TFIP11	-0.71127	1.30289e-06	1.45621	-0.44156	1.30289e-06	0.576271	-1.7325	1.30289e-06	1.17239	-2.7702	1.30289e-06	1.52809	-0.99726	1.30289e-06	1.67861	-1.182	1.30289e-06	1.94773
BRCA2	-0.74044	1.30289e-06	0.535344	-1.4009	1.30289e-06	1.69197	-1.4312	1.30289e-06	2.31194	-0.84593	1.30289e-06	1.77671	-1.562	1.30289e-06	1.67772	-1.6915	1.30289e-06	1.10857
RPL24	-2.7835	1.30289e-06	1.97997	-2.6754	1.30289e-06	1.98022	-1.6104	1.30289e-06	1.80391	-2.5577	1.30289e-06	2.01918	-3.4041	1.30289e-06	1.67483	-3.5768	1.30289e-06	2.15546
CHEK1	-3.1885	1.30289e-06	1.83911	-3.7781	1.30289e-06	1.75323	-4.4739	1.30289e-06	2.11554	-3.9538	1.30289e-06	2.03358	-3.9945	1.30289e-06	1.67199	-3.2716	1.30289e-06	2.40528
SUDS3	-0.83764	1.30289e-06	0.680344	-0.41968	1.30289e-06	0.856133	-1.241	1.30289e-06	1.5581	-0.87062	1.30289e-06	1.52337	-1.0117	1.30289e-06	1.66918	-1.4003	1.30289e-06	1.24298
ERCC1	-0.55535	1.30289e-06	0.211692	-0.31298	1.30289e-06	0.0133801	-2.684	1.30289e-06	1.58697	-0.19141	1.30289e-06	1.30289e-06	-1.8859	1.30289e-06	1.6616	-1.2308	1.30289e-06	0.758917
COPS2	-2.0733	1.30289e-06	2.4973	-2.7094	1.30289e-06	2.38458	-2.7478	1.30289e-06	2.07608	-3.3857	1.30289e-06	2.33989	-1.6019	1.30289e-06	1.66029	-1.2408	1.30289e-06	1.60599
RPL38	-1.5609	1.30289e-06	0.763123	-3.6944	1.30289e-06	1.8017	-2.5736	1.30289e-06	1.6216	-2.8414	1.30289e-06	2.4603	-2.078	1.30289e-06	1.66029	-3.4608	1.30289e-06	2.45149
CD3EAP	-0.72295	1.30289e-06	0.407294	0.12644	1.30289e-06	1.30289e-06	-0.31322	1.30289e-06	0.224674	-0.65706	1.30289e-06	0.0375156	-1.8278	1.30289e-06	1.65956	-1.3359	1.30289e-06	0.750278
USP39	-3.799	1.30289e-06	1.71449	-2.704	1.30289e-06	1.78803	-3.3205	1.30289e-06	1.69713	-3.3559	1.30289e-06	1.46473	-4.2135	1.30289e-06	1.65718	-3.4518	1.30289e-06	1.62655
YAP1	-0.33102	1.30289e-06	1.30289e-06	-0.96263	1.30289e-06	0.742072	-0.8736	1.30289e-06	0.141305	-1.9253	1.30289e-06	0.820264	-2.2996	1.30289e-06	1.65718	-2.5153	1.30289e-06	1.44094
WDR83	-0.96304	1.30289e-06	1.00696	-0.30263	1.30289e-06	1.30289e-06	-0.70988	1.30289e-06	1.65361	-1.5443	1.30289e-06	2.42748	-0.78034	1.30289e-06	1.64921	-0.70433	1.30289e-06	0.800486
NUP133	-1.0937	1.30289e-06	1.00696	-2.4903	1.30289e-06	2.30539	-2.0384	1.30289e-06	2.31185	-2.2646	1.30289e-06	1.91532	-1.9708	1.30289e-06	1.63592	-1.138	1.30289e-06	1.61117
CHMP2A	-2.6081	1.30289e-06	1.66853	-2.4355	1.30289e-06	2.36031	-2.4232	1.30289e-06	2.41341	-4.2578	1.30289e-06	2.40938	-1.7977	1.30289e-06	1.63592	-1.8194	1.30289e-06	2.1986
NR2C2AP	-0.43929	1.30289e-06	1.30289e-06	-1.1407	1.30289e-06	0.632644	-0.4525	1.30289e-06	0.340426	-1.442	1.30289e-06	1.66506	-1.4123	1.30289e-06	1.63592	-1.8147	1.30289e-06	1.18438
PSMA3	-3.4704	1.30289e-06	1.80841	-4.9722	1.30289e-06	1.91425	-2.7323	1.30289e-06	1.28805	-3.4722	1.30289e-06	1.76556	-3.3904	1.30289e-06	1.63592	-3.6605	1.30289e-06	1.82079
SF3B1	-2.4677	1.30289e-06	2.4973	-2.6669	1.30289e-06	2.19887	-2.5923	1.30289e-06	2.21084	-4.1973	1.30289e-06	2.0816	-2.6243	1.30289e-06	1.627	-2.2725	1.30289e-06	2.36071
EIF2B4	-3.583	1.30289e-06	1.42549	-4.7625	1.30289e-06	1.33609	-3.105	1.30289e-06	0.623699	-2.8896	1.30289e-06	1.12945	-3.1345	1.30289e-06	1.62485	-2.7652	1.30289e-06	1.13074
FIS1	-0.15588	1.30289e-06	1.30289e-06	-0.71281	1.30289e-06	0.476086	-0.27156	1.30289e-06	1.30289e-06	-0.63542	1.30289e-06	0.456393	-2.4824	1.30289e-06	1.6203	0.0073278	1.30289e-06	1.30289e-06
RPL7A	-2.5699	1.30289e-06	1.142	-4.4611	1.30289e-06	1.68062	-2.6102	1.30289e-06	2.14279	-4.2336	1.30289e-06	2.2392	-3.6664	1.30289e-06	1.61824	-2.6943	1.30289e-06	1.15254
RAD50	-1.0067	1.30289e-06	1.35638	-1.0475	1.30289e-06	1.3478	-2.4114	1.30289e-06	1.76754	-1.7245	1.30289e-06	1.05499	-1.5396	1.30289e-06	1.60599	-0.62504	1.30289e-06	0.591757
CCT7	-3.0245	1.30289e-06	1.20881	-3.6086	1.30289e-06	1.97765	-4.7415	1.30289e-06	1.84179	-4.7737	1.30289e-06	2.10095	-2.5198	1.30289e-06	1.59796	-3.9142	1.30289e-06	1.83815
CLTC	-2.4897	1.30289e-06	2.05007	-2.177	1.30289e-06	2.26728	-2.3856	1.30289e-06	1.93029	-1.115	1.30289e-06	1.63648	-1.4946	1.30289e-06	1.58648	-1.4543	1.30289e-06	1.7716
MRPL10	-0.95402	1.30289e-06	2.09366	-0.30486	1.30289e-06	0.250171	-2.0212	1.30289e-06	1.32511	-0.56972	1.30289e-06	0.461598	-0.8482	1.30289e-06	1.57896	-0.75405	1.30289e-06	0.41192
RAN	-3.657	1.30289e-06	1.28156	-5.3946	1.30289e-06	1.1165	-5.4249	1.30289e-06	2.09832	-4.1776	1.30289e-06	2.34256	-3.6987	1.30289e-06	1.57728	-4.6242	1.30289e-06	2.3974
SUPT6H	-2.8668	1.30289e-06	2.24374	-2.9	1.30289e-06	2.37592	-1.9869	1.30289e-06	1.42586	-1.7122	1.30289e-06	0.833937	-2.4485	1.30289e-06	1.57141	-2.7102	1.30289e-06	1.89932
EIF3B	-2.3852	1.30289e-06	1.38253	-2.4012	1.30289e-06	1.5872	-2.6518	1.30289e-06	1.45463	-3.5932	1.30289e-06	2.24132	-3.6246	1.30289e-06	1.55482	-2.9939	1.30289e-06	1.84454
TRMT1	-0.75886	1.30289e-06	1.08563	-0.3037	1.30289e-06	1.30289e-06	-0.36307	1.30289e-06	1.30289e-06	-0.48761	1.30289e-06	1.30289e-06	-1.0384	1.30289e-06	1.55335	-0.48604	1.30289e-06	1.12847
BRIP1	-1.3996	1.30289e-06	2.15764	-0.13227	1.30289e-06	1.30289e-06	-1.1837	1.30289e-06	1.44057	0.26786	1.30289e-06	1.30289e-06	-0.72587	1.30289e-06	1.54212	-1.0883	1.30289e-06	1.08938
RPL5	-1.5317	1.30289e-06	0.574119	-3.7147	1.30289e-06	1.42426	-2.4396	1.30289e-06	1.71162	-4.7341	1.30289e-06	2.11295	-2.56	1.30289e-06	1.53377	-3.4126	1.30289e-06	2.10652
HNRNPK	-2.0992	1.30289e-06	1.65269	-2.9201	1.30289e-06	0.744055	-2.5326	1.30289e-06	1.82143	-2.4815	1.30289e-06	2.36381	-2.261	1.30289e-06	1.53374	-3.1124	1.30289e-06	1.95121
HSPA4	-0.095008	1.30289e-06	1.30289e-06	-1.1086	1.30289e-06	0.908266	-0.012287	1.30289e-06	1.30289e-06	-0.30945	1.30289e-06	1.30289e-06	-0.81868	1.30289e-06	1.52628	-0.40194	1.30289e-06	1.30289e-06
CDC5L	-2.7822	1.30289e-06	2.30539	-2.8613	1.30289e-06	2.37592	-2.4616	1.30289e-06	1.91009	-1.5107	1.30289e-06	1.45853	-2.5458	1.30289e-06	1.52628	-2.4969	1.30289e-06	2.31551
KAT5	-1.9127	1.30289e-06	0.959026	-1.8794	1.30289e-06	1.20767	-2.447	1.30289e-06	2.22878	-2.9412	1.30289e-06	2.07743	-1.7118	1.30289e-06	1.51544	-2.1389	1.30289e-06	1.24754
VPS52	-1.7025	1.30289e-06	0.517957	-1.0977	1.30289e-06	0.620129	-0.96755	1.30289e-06	1.40853	-3.1273	1.30289e-06	1.60418	-2.3523	1.30289e-06	1.50621	-2.7689	1.30289e-06	1.95121
COPB1	-3.8706	1.30289e-06	1.34081	-4.1365	1.30289e-06	2.55517	-3.3912	1.30289e-06	2.41341	-3.4156	1.30289e-06	2.42748	-2.1455	1.30289e-06	1.50621	-3.0347	1.30289e-06	2.40528
HSCB	-2.5406	1.30289e-06	0.798122	-2.7708	1.30289e-06	1.52683	-3.595	1.30289e-06	2.48466	-3.8091	1.30289e-06	2.4603	-1.1996	1.30289e-06	1.47365	-2.036	1.30289e-06	1.36115
EXOSC10	-0.9401	1.30289e-06	0.548774	-0.99717	1.30289e-06	0.439306	-0.98894	1.30289e-06	0.13277	-1.6725	1.30289e-06	1.01173	-0.78193	1.30289e-06	1.45389	-1.3317	1.30289e-06	0.750564
NACA	-3.0478	1.30289e-06	1.73273	-2.6152	1.30289e-06	1.72296	-2.0212	1.30289e-06	1.00519	-3.3237	1.30289e-06	1.25023	-3.9047	1.30289e-06	1.45344	-3.176	1.30289e-06	1.41518
AC098680.1	-5.3677	1.30289e-06	1.37519	-5.4437	1.30289e-06	1.315	-5.3263	1.30289e-06	1.42407	-5.3207	1.30289e-06	1.36768	-4.4582	1.30289e-06	1.45344	-3.7223	1.30289e-06	1.33062
RPS19	-3.7211	1.30289e-06	2.34056	-4.6321	1.30289e-06	2.55517	-4.5402	1.30289e-06	2.35783	-5.3369	1.30289e-06	2.40318	-5.1319	1.30289e-06	1.45223	-3.2563	1.30289e-06	2.42262
RNU6-312P	-0.93881	1.30289e-06	1.11247	-0.89461	1.30289e-06	0.955625	-1.9367	1.30289e-06	1.64155	-0.86033	1.30289e-06	0.327743	-1.2568	1.30289e-06	1.44562	-2.2989	1.30289e-06	1.61973
RPA1	-2.3563	1.30289e-06	2.15764	-4.1683	1.30289e-06	2.37592	-3.4178	1.30289e-06	2.15639	-4.3434	1.30289e-06	2.29073	-2.8956	1.30289e-06	1.42551	-3.3092	1.30289e-06	2.37417
BRCA1	-0.14509	1.30289e-06	1.30289e-06	-0.23076	1.30289e-06	1.30289e-06	-0.59357	1.30289e-06	0.0190186	-0.58362	1.30289e-06	0.204181	-1.0664	1.30289e-06	1.41133	-0.33562	1.30289e-06	0.105196
FTSJ3	-0.85333	1.30289e-06	1.8629	-1.4541	1.30289e-06	2.38269	-1.9065	1.30289e-06	1.46241	-2.104	1.30289e-06	1.29051	-1.6935	1.30289e-06	1.40248	-2.3005	1.30289e-06	2.19518
DPM3	-0.54056	1.30289e-06	0.305318	0.04754	1.30289e-06	1.30289e-06	-0.63153	1.30289e-06	1.231	-0.80707	1.30289e-06	0.883984	-0.8866	1.30289e-06	1.40118	-0.65432	1.30289e-06	0.603637
TUBGCP2	-2.321	1.30289e-06	1.07607	-3.5604	1.30289e-06	1.25222	-3.5784	1.30289e-06	1.39454	-2.6594	1.30289e-06	1.09992	-3.2769	1.30289e-06	1.40118	-2.802	1.30289e-06	1.29815
COPE	-4.473	1.30289e-06	1.8629	-1.9817	1.30289e-06	1.28452	-1.6894	1.30289e-06	1.31992	-1.9822	1.30289e-06	1.01525	-4.0617	1.30289e-06	1.39819	-2.38	1.30289e-06	1.59755
EIF2S2	-0.57331	1.30289e-06	0.217186	-2.3169	1.30289e-06	1.04962	-2.54	1.30289e-06	1.0691	-2.3531	1.30289e-06	1.20412	-2.3114	1.30289e-06	1.39693	-1.684	1.30289e-06	1.21061
EIF3F	-0.93017	1.30289e-06	0.505008	-1.557	1.30289e-06	0.479721	-1.4662	1.30289e-06	0.803321	-2.2647	1.30289e-06	1.02743	-1.5441	1.30289e-06	1.38699	-1.3929	1.30289e-06	1.34289
ZNF207	-1.1057	1.30289e-06	1.83911	-1.1727	1.30289e-06	1.24292	-2.1529	1.30289e-06	1.61257	-1.5334	1.30289e-06	1.15684	-2.1833	1.30289e-06	1.38473	-1.1892	1.30289e-06	1.73091
STT3B	-0.2618	1.30289e-06	1.30289e-06	-0.35754	1.30289e-06	0.187399	0.0043815	1.30289e-06	1.30289e-06	-0.34781	1.30289e-06	0.26462	-1.3767	1.30289e-06	1.38473	-1.3191	1.30289e-06	0.984976
SUGP1	-0.49104	1.30289e-06	0.172774	-0.37084	1.30289e-06	1.30289e-06	-1.2585	1.30289e-06	1.63752	-1.5873	1.30289e-06	1.69999	-1.1166	1.30289e-06	1.38473	-1.1166	1.30289e-06	2.02209
POLR2F	-3.1547	1.30289e-06	2.71829	-4.8719	1.30289e-06	1.72997	-3.6256	1.30289e-06	2.24154	-4.9116	1.30289e-06	2.5236	-3.4924	1.30289e-06	1.37928	-3.1376	1.30289e-06	1.58162
LSM11	-2.6023	1.30289e-06	1.49824	-3.9573	1.30289e-06	0.664017	-2.9344	1.30289e-06	1.5581	-2.7856	1.30289e-06	1.24295	-2.4532	1.30289e-06	1.37928	-2.6055	1.30289e-06	1.29132
SF3A2	-2.5016	1.30289e-06	1.4811	-2.5318	1.30289e-06	1.41802	-1.4622	1.30289e-06	0.73777	-2.4656	1.30289e-06	1.30297	-2.0003	1.30289e-06	1.37828	-2.0926	1.30289e-06	1.46102
HNRNPM	-0.33624	1.30289e-06	1.30289e-06	-0.57669	1.30289e-06	0.428381	-0.54641	1.30289e-06	1.52862	-0.65236	1.30289e-06	1.27409	-0.99545	1.30289e-06	1.37525	-0.85795	1.30289e-06	1.15655
RPL14	-2.9802	1.30289e-06	1.51687	-3.6712	1.30289e-06	1.71645	-2.367	1.30289e-06	1.10132	-4.1586	1.30289e-06	1.25912	-3.2586	1.30289e-06	1.36541	-2.9098	1.30289e-06	1.48597
ATP5A1	-1.1659	1.30289e-06	2.28416	-1.1561	1.30289e-06	2.19887	-2.4058	1.30289e-06	2.5367	-2.0387	1.30289e-06	2.42056	-0.63159	1.30289e-06	1.3618	-0.66059	1.30289e-06	0.62319
HNRNPU	-2.3006	1.30289e-06	1.42538	-3.345	1.30289e-06	1.94688	-4.3276	1.30289e-06	1.46216	-2.0288	1.30289e-06	1.14777	-2.2497	1.30289e-06	1.36157	-2.8227	1.30289e-06	1.53757
ETF1	-3.319	1.30289e-06	1.55424	-5.3018	1.30289e-06	1.05559	-4.6133	1.30289e-06	1.38606	-5.4888	1.30289e-06	2.29073	-3.1323	1.30289e-06	1.3551	-2.1267	1.30289e-06	1.26515
CCT3	-3.1031	1.30289e-06	1.47954	-5.2616	1.30289e-06	2.55517	-3.3883	1.30289e-06	1.70961	-4.888	1.30289e-06	2.4603	-1.854	1.30289e-06	1.33053	-3.2001	1.30289e-06	2.35067
SUPT5H	-2.0407	1.30289e-06	1.24574	-2.1767	1.30289e-06	1.18133	-1.365	1.30289e-06	0.276915	-1.6722	1.30289e-06	0.855977	-1.3725	1.30289e-06	1.32839	-1.9912	1.30289e-06	1.21351
GON4L	-0.97167	1.30289e-06	2.15764	-1.1503	1.30289e-06	1.74975	-1.2455	1.30289e-06	1.08538	-1.4527	1.30289e-06	1.97318	-0.93295	1.30289e-06	1.29888	-1.2049	1.30289e-06	1.35893
SNUPN	-1.1834	1.30289e-06	0.522286	-2.2473	1.30289e-06	1.74666	-1.4841	1.30289e-06	1.33009	-2.4478	1.30289e-06	2.34199	-0.68653	1.30289e-06	1.29888	-0.99435	1.30289e-06	1.27233
RBM17	-0.85443	1.30289e-06	1.49924	-0.92263	1.30289e-06	1.30024	-2.7228	1.30289e-06	2.41341	-1.6832	1.30289e-06	2.18509	-0.68697	1.30289e-06	1.29888	-1.1133	1.30289e-06	2.00829
PSMA2	-2.2769	1.30289e-06	0.854505	-2.9174	1.30289e-06	1.15885	-2.9891	1.30289e-06	1.2846	-3.9113	1.30289e-06	1.29161	-3.199	1.30289e-06	1.28575	-1.6599	1.30289e-06	0.774288
YY1	-1.2181	1.30289e-06	1.0139	-0.075981	1.30289e-06	1.30289e-06	-1.3779	1.30289e-06	1.35758	-1.3943	1.30289e-06	0.280505	-1.9558	1.30289e-06	1.28575	-1.111	1.30289e-06	0.725992
SF3A1	-3.0376	1.30289e-06	1.49867	-2.6891	1.30289e-06	1.29283	-1.5841	1.30289e-06	1.04243	-1.767	1.30289e-06	1.82545	-2.9637	1.30289e-06	1.27806	-2.2872	1.30289e-06	1.21855
CDC27	-1.5679	1.30289e-06	1.59421	-0.94874	1.30289e-06	0.432636	-2.7937	1.30289e-06	2.43028	-1.1484	1.30289e-06	2.07826	-1.2838	1.30289e-06	1.26368	-1.9542	1.30289e-06	1.48282
SF3B2	-3.2388	1.30289e-06	0.615102	-4.081	1.30289e-06	1.69547	-1.2525	1.30289e-06	1.23989	-2.5587	1.30289e-06	1.15684	-2.1963	1.30289e-06	1.25722	-3.151	1.30289e-06	0.553334
CPSF2	-1.8542	1.30289e-06	0.959026	-1.5543	1.30289e-06	0.944778	-3.0524	1.30289e-06	2.14588	-3.1268	1.30289e-06	2.11839	-2.2163	1.30289e-06	1.24103	-2.0114	1.30289e-06	1.25181
EIF1AD	-0.87755	1.30289e-06	0.976859	-1.7602	1.30289e-06	1.11034	-3.3792	1.30289e-06	2.04082	-3.9028	1.30289e-06	2.82016	-2.1905	1.30289e-06	1.22016	-1.4388	1.30289e-06	1.36824
OLA1	0.24716	1.30289e-06	1.30289e-06	0.2984	1.30289e-06	1.30289e-06	0.03069	1.30289e-06	1.30289e-06	0.211	1.30289e-06	1.30289e-06	-0.4299	1.30289e-06	1.21741	-0.19843	1.30289e-06	1.30289e-06
COPS4	-2.6114	1.30289e-06	1.66951	-2.3494	1.30289e-06	1.33921	-2.973	1.30289e-06	1.94935	-3.0739	1.30289e-06	2.35863	-0.92144	1.30289e-06	1.21718	-1.8362	1.30289e-06	1.83896
DCLRE1B	-0.63991	1.30289e-06	0.750435	-1.0128	1.30289e-06	0.27279	-0.32269	1.30289e-06	0.315568	-0.39943	1.30289e-06	0.13272	-1.2852	1.30289e-06	1.20759	-0.6994	1.30289e-06	0.606737
MRE11	-0.42673	1.30289e-06	0.341726	-0.86405	1.30289e-06	0.146652	-1.9447	1.30289e-06	2.41341	-1.9542	1.30289e-06	1.90872	-0.64231	1.30289e-06	1.19305	-1.1783	1.30289e-06	1.6956
EEF2	-1.0975	1.30289e-06	0.775019	-3.0452	1.30289e-06	1.22045	-4.7185	1.30289e-06	1.64676	-3.8712	1.30289e-06	1.78267	-2.7946	1.30289e-06	1.17886	-1.9447	1.30289e-06	1.21951
RAD23B	-0.10889	1.30289e-06	1.30289e-06	-0.74974	1.30289e-06	0.714287	0.087029	1.30289e-06	1.30289e-06	-0.5058	1.30289e-06	1.23611	-0.4969	1.30289e-06	1.17024	-0.47574	1.30289e-06	0.0314241
PRC1	-2.7256	1.30289e-06	1.13204	-4.7892	1.30289e-06	1.63954	-4.7177	1.30289e-06	2.15571	-3.8762	1.30289e-06	2.04398	-1.5117	1.30289e-06	1.14104	-2.6804	1.30289e-06	1.95288
U2AF2	-1.8947	1.30289e-06	1.62687	-2.8044	1.30289e-06	1.20356	-2.0606	1.30289e-06	1.82481	-4.404	1.30289e-06	2.18649	-1.9945	1.30289e-06	1.13076	-2.4414	1.30289e-06	1.69366
ERBB2	0.19792	1.30289e-06	1.30289e-06	0.088295	1.30289e-06	1.30289e-06	-0.071406	1.30289e-06	1.30289e-06	-0.084066	1.30289e-06	1.30289e-06	-0.9342	1.30289e-06	1.12628	-0.10783	1.30289e-06	1.30289e-06
RPL31	-2.331	1.30289e-06	0.795308	-2.8536	1.30289e-06	1.10366	-1.3704	1.30289e-06	1.07605	-3.6167	1.30289e-06	1.40414	-2.5084	1.30289e-06	1.11354	-2.5995	1.30289e-06	0.895772
RPL4	-1.9445	1.30289e-06	1.07895	-3.9748	1.30289e-06	1.37897	-3.2847	1.30289e-06	1.9984	-3.6157	1.30289e-06	2.33989	-3.1793	1.30289e-06	1.09746	-2.7446	1.30289e-06	1.26651
CCT8	-1.1096	1.30289e-06	0.916469	-2.1434	1.30289e-06	1.9619	-3.6324	1.30289e-06	2.15571	-4.1861	1.30289e-06	2.15958	-2.6496	1.30289e-06	1.09276	-2.2591	1.30289e-06	1.94958
APC	-1.0856	1.30289e-06	1.23503	-1.4252	1.30289e-06	0.301768	-0.26756	1.30289e-06	1.30289e-06	-1.8399	1.30289e-06	0.55458	-1.1449	1.30289e-06	1.09099	-1.2335	1.30289e-06	1.39938
IMP3	-0.8429	1.30289e-06	0.549323	-1.2647	1.30289e-06	1.34845	-1.4057	1.30289e-06	0.76782	-1.8934	1.30289e-06	0.974043	-2.7946	1.30289e-06	1.04758	-1.8554	1.30289e-06	0.597345
INTS12	-0.38373	1.30289e-06	1.30289e-06	-1.3125	1.30289e-06	0.962856	-0.76411	1.30289e-06	0.781538	-0.75097	1.30289e-06	0.452797	-1.6688	1.30289e-06	1.00511	-1.3577	1.30289e-06	0.620816
TFAP4	0.16388	1.30289e-06	1.30289e-06	-1.1554	1.30289e-06	0.142795	-0.084151	1.30289e-06	1.30289e-06	-0.65897	1.30289e-06	1.01157	-1.0127	1.30289e-06	1.00354	-0.91418	1.30289e-06	1.7537
ASNA1	-0.67612	1.30289e-06	0.545402	-1.3365	1.30289e-06	2.08103	-1.3648	1.30289e-06	1.65318	-1.9397	1.30289e-06	1.96533	-1.0715	1.30289e-06	1.0027	-1.5538	1.30289e-06	2.51414
VDAC1	-1.7226	1.30289e-06	2.22286	-1.5622	1.30289e-06	0.892997	-1.485	1.30289e-06	1.94761	-1.1927	1.30289e-06	2.08207	-0.86102	1.30289e-06	0.996617	-1.0267	1.30289e-06	2.19321
SRCAP	-0.55479	1.30289e-06	0.282016	-0.3001	1.30289e-06	1.30289e-06	-1.2622	1.30289e-06	2.08762	-1.1715	1.30289e-06	1.51074	-0.75917	1.30289e-06	0.996617	-1.6131	1.30289e-06	1.22816
RP11-326G21.1	0.26589	1.30289e-06	1.30289e-06	-0.49918	1.30289e-06	0.0598647	0.032664	1.30289e-06	1.30289e-06	0.036285	1.30289e-06	1.30289e-06	-0.35174	1.30289e-06	0.996617	-0.34372	1.30289e-06	0.152252
PPP1R15B	-1.3225	1.30289e-06	1.00696	-1.8706	1.30289e-06	1.22045	-0.16258	1.30289e-06	0.130239	-0.17307	1.30289e-06	1.30289e-06	-0.94108	1.30289e-06	0.981936	-0.848	1.30289e-06	0.661484
SLC16A1	-0.098503	1.30289e-06	1.30289e-06	0.038914	1.30289e-06	1.30289e-06	-0.21127	1.30289e-06	1.30289e-06	-0.70993	1.30289e-06	0.625587	-0.48036	1.30289e-06	0.978844	-1.1028	1.30289e-06	1.33809
FANCM	-0.7469	1.30289e-06	0.57624	-1.2131	1.30289e-06	1.00995	-0.69173	1.30289e-06	0.170402	-0.76838	1.30289e-06	0.806491	-0.88415	1.30289e-06	0.978794	-0.75114	1.30289e-06	1.16569
ATAD5	-0.66883	1.30289e-06	0.551186	0.16113	1.30289e-06	1.30289e-06	-0.2454	1.30289e-06	1.30289e-06	-0.95485	1.30289e-06	0.180762	-0.59531	1.30289e-06	0.96011	-0.20996	1.30289e-06	1.30289e-06
RPL23A	-1.9795	1.30289e-06	0.786259	-2.6939	1.30289e-06	0.910664	-2.8257	1.30289e-06	0.757958	-1.6332	1.30289e-06	0.982766	-2.8763	1.30289e-06	0.958998	-2.8607	1.30289e-06	0.755696
AFF4	-1.0829	1.30289e-06	1.47954	-1.9417	1.30289e-06	2.13359	-0.16687	1.30289e-06	1.30289e-06	-0.24719	1.30289e-06	1.30289e-06	-0.74725	1.30289e-06	0.952254	-0.36827	1.30289e-06	1.30289e-06
USP19	-0.30715	1.30289e-06	1.30289e-06	0.24843	1.30289e-06	1.30289e-06	-0.22647	1.30289e-06	1.30289e-06	-0.0083526	1.30289e-06	1.30289e-06	-0.99184	1.30289e-06	0.950953	-0.5759	1.30289e-06	0.321114
RNU4-2	-1.8942	1.30289e-06	2.86614	-1.967	1.30289e-06	2.55517	-0.88023	1.30289e-06	1.96313	-1.8208	1.30289e-06	2.82016	-0.9218	1.30289e-06	0.914581	-0.95724	1.30289e-06	1.69463
HCN3	0.097608	1.30289e-06	1.30289e-06	-0.11934	1.30289e-06	1.30289e-06	-0.09041	1.30289e-06	1.30289e-06	-0.11976	1.30289e-06	1.30289e-06	-1.0093	1.30289e-06	0.913185	-0.3673	1.30289e-06	0.10849
TEFM	-0.93847	1.30289e-06	0.951271	-0.51671	1.30289e-06	0.377291	-2.0104	1.30289e-06	2.72033	-0.70345	1.30289e-06	1.39629	-0.84551	1.30289e-06	0.904991	-0.76324	1.30289e-06	1.07698
HSPA13	-0.052803	1.30289e-06	1.30289e-06	-0.23576	1.30289e-06	1.30289e-06	-0.014674	1.30289e-06	1.30289e-06	0.062872	1.30289e-06	1.30289e-06	-1.3133	1.30289e-06	0.904625	-0.61562	1.30289e-06	0.87152
TUBG1	-1.8801	1.30289e-06	0.687353	-1.1589	1.30289e-06	0.538988	-2.9799	1.30289e-06	1.59719	-1.2376	1.30289e-06	0.532561	-2.1035	1.30289e-06	0.904154	-2.7539	1.30289e-06	2.19321
H2AFX	-0.095591	1.30289e-06	1.30289e-06	-0.30211	1.30289e-06	1.30289e-06	-0.015575	1.30289e-06	1.30289e-06	-0.09625	1.30289e-06	1.30289e-06	-1.0556	1.30289e-06	0.901886	0.0081209	1.30289e-06	1.30289e-06
ASCC2	-0.89432	1.30289e-06	0.699289	-0.50046	1.30289e-06	0.15838	-1.1331	1.30289e-06	0.265937	-0.27659	1.30289e-06	1.30289e-06	-0.78794	1.30289e-06	0.870616	-0.2788	1.30289e-06	0.010161
RPS7	-0.0074673	1.30289e-06	0.149794	-0.74792	1.30289e-06	0.448887	-1.0016	1.30289e-06	0.673781	-2.1519	1.30289e-06	1.21587	-1.1482	1.30289e-06	0.868705	-1.3528	1.30289e-06	1.10132
PRMT7	-0.32764	1.30289e-06	1.30289e-06	-0.65119	1.30289e-06	0.900603	-0.53391	1.30289e-06	0.649217	-0.01969	1.30289e-06	1.30289e-06	-0.70804	1.30289e-06	0.868705	-0.67824	1.30289e-06	1.14342
SART1	-1.7088	1.30289e-06	1.81801	-1.5691	1.30289e-06	1.8185	-1.5232	1.30289e-06	1.9017	-1.5007	1.30289e-06	1.62759	-1.2231	1.30289e-06	0.863711	-0.68795	1.30289e-06	1.37015
TUBA1B	-1.6852	1.30289e-06	1.42857	-2.3935	1.30289e-06	1.61473	-2.0364	1.30289e-06	1.05272	-3.3402	1.30289e-06	1.92749	-0.77313	1.30289e-06	0.853175	-1.0567	1.30289e-06	0.895755
DYNLL1	-0.38207	1.30289e-06	1.30289e-06	-0.39941	1.30289e-06	0.142795	-1.2411	1.30289e-06	0.332052	-0.10464	1.30289e-06	0.143917	-1.5216	1.30289e-06	0.845412	-1.2701	1.30289e-06	0.706428
NUP93	-2.4008	1.30289e-06	1.83911	-4.7437	1.30289e-06	2.14158	-3.8583	1.30289e-06	1.78188	-3.228	1.30289e-06	1.49716	-2.7074	1.30289e-06	0.842776	-2.2965	1.30289e-06	1.59977
RPL37	-1.6362	1.30289e-06	0.557912	-0.8681	1.30289e-06	0.133937	-0.91717	1.30289e-06	0.721576	-1.7152	1.30289e-06	1.05673	-2.21	1.30289e-06	0.842776	-2.0425	1.30289e-06	2.34989
DDA1	-0.36951	1.30289e-06	0.252053	-0.02058	1.30289e-06	1.30289e-06	-0.77029	1.30289e-06	0.919745	-0.66078	1.30289e-06	0.422924	-1.3656	1.30289e-06	0.842776	-0.19292	1.30289e-06	0.199004
THOC7	-0.96649	1.30289e-06	0.57624	-1.5744	1.30289e-06	0.405444	-2.1701	1.30289e-06	0.739774	-1.6203	1.30289e-06	0.53844	-2.2823	1.30289e-06	0.83954	-1.2391	1.30289e-06	0.837675
NDUFA13	-0.3627	1.30289e-06	1.30289e-06	-0.21877	1.30289e-06	0.107549	-1.9242	1.30289e-06	1.42061	-1.1167	1.30289e-06	1.76586	-0.79883	1.30289e-06	0.795297	-0.43157	1.30289e-06	0.352257
COPS8	-0.97761	1.30289e-06	0.771469	-1.5483	1.30289e-06	0.576271	-1.5291	1.30289e-06	1.16789	-2.0487	1.30289e-06	1.02918	-0.80778	1.30289e-06	0.795297	-0.75387	1.30289e-06	0.488368
PEX11B	-0.44949	1.30289e-06	0.420524	-0.3913	1.30289e-06	0.953275	-0.24064	1.30289e-06	1.30289e-06	-0.38707	1.30289e-06	0.614726	-0.47061	1.30289e-06	0.782411	-0.31766	1.30289e-06	0.0206497
RPA2	-1.6189	1.30289e-06	0.48073	-2.275	1.30289e-06	0.656389	-1.6711	1.30289e-06	1.05596	-1.2995	1.30289e-06	1.30908	-1.2671	1.30289e-06	0.778797	-2.2709	1.30289e-06	1.24913
RPL35	-2.0887	1.30289e-06	1.46602	-3.1194	1.30289e-06	1.22572	-1.8039	1.30289e-06	1.2805	-2.2687	1.30289e-06	1.23611	-2.0053	1.30289e-06	0.771202	-2.8624	1.30289e-06	1.59755
ATP13A1	-0.20774	1.30289e-06	1.30289e-06	-0.43239	1.30289e-06	0.917947	-1.0636	1.30289e-06	0.258195	-0.38287	1.30289e-06	0.191936	-0.88037	1.30289e-06	0.761106	-0.61431	1.30289e-06	0.933469
PRKRIP1	-1.0127	1.30289e-06	0.57624	-1.9641	1.30289e-06	1.26533	-0.36076	1.30289e-06	0.328203	-1.5452	1.30289e-06	1.1054	-1.582	1.30289e-06	0.756013	-0.66737	1.30289e-06	0.512463
XRN1	-0.30927	1.30289e-06	1.30289e-06	0.04429	1.30289e-06	0.0785268	-1.3774	1.30289e-06	2.45051	-0.90728	1.30289e-06	1.44768	-0.26947	1.30289e-06	0.746907	-1.4204	1.30289e-06	2.52143
PABPN1	0.01296	1.30289e-06	1.30289e-06	-0.94167	1.30289e-06	0.0472381	-0.76624	1.30289e-06	0.825286	-0.4131	1.30289e-06	0.210846	-0.94915	1.30289e-06	0.746907	-1.3849	1.30289e-06	0.930791
CFL1	0.0052527	1.30289e-06	1.30289e-06	-0.57727	1.30289e-06	0.677062	-1.3521	1.30289e-06	0.463334	-1.6019	1.30289e-06	0.556776	-2.1861	1.30289e-06	0.740669	-0.75541	1.30289e-06	0.30026
SNORD118	0.046711	1.30289e-06	1.30289e-06	-0.66254	1.30289e-06	0.310213	-1.0819	1.30289e-06	0.781538	-1.071	1.30289e-06	0.77814	-1.8828	1.30289e-06	0.731644	-1.5499	1.30289e-06	0.813863
MRPL34	-1.1788	1.30289e-06	1.70914	-0.72599	1.30289e-06	1.04889	-1.5699	1.30289e-06	2.48466	-0.70152	1.30289e-06	1.93832	-0.6211	1.30289e-06	0.731644	-0.22441	1.30289e-06	1.30289e-06
NUP98	-2.6006	1.30289e-06	0.659875	-2.339	1.30289e-06	0.660737	-2.605	1.30289e-06	0.862627	-3.6743	1.30289e-06	0.782624	-2.9317	1.30289e-06	0.726939	-2.7607	1.30289e-06	0.80758
DAP3	-1.9953	1.30289e-06	2.22286	-1.6028	1.30289e-06	0.208884	-3.1431	1.30289e-06	2.20901	-1.2415	1.30289e-06	0.874353	-0.35726	1.30289e-06	0.725727	-0.95448	1.30289e-06	1.21876
AAMP	-1.7422	1.30289e-06	1.18469	-0.99665	1.30289e-06	1.13711	-1.9202	1.30289e-06	1.46556	-2.9891	1.30289e-06	1.54789	-1.9439	1.30289e-06	0.699607	-1.0199	1.30289e-06	0.878227
NOL12	-1.0527	1.30289e-06	1.65269	-0.97991	1.30289e-06	0.742072	-0.095051	1.30289e-06	1.30289e-06	-1.9792	1.30289e-06	2.06033	-1.731	1.30289e-06	0.689215	-1.3675	1.30289e-06	1.86922
RP11-53O19.2	-1.308	1.30289e-06	0.556959	-1.2478	1.30289e-06	1.10366	-1.4524	1.30289e-06	0.704336	-2.0105	1.30289e-06	1.329	-0.9444	1.30289e-06	0.664215	-1.5153	1.30289e-06	1.21855
SFPQ	-2.3411	1.30289e-06	2.15083	-3.7838	1.30289e-06	2.19887	-1.7545	1.30289e-06	1.62042	-5.2814	1.30289e-06	0.651902	-3.1161	1.30289e-06	0.645943	-1.9733	1.30289e-06	0.953841
RBM48	-0.8558	1.30289e-06	0.214447	-0.66904	1.30289e-06	0.479721	-1.225	1.30289e-06	1.59719	-1.5203	1.30289e-06	1.25302	-1.1458	1.30289e-06	0.622171	-1.2517	1.30289e-06	0.543894
HIST2H2AC	-0.41144	1.30289e-06	0.14677	-1.185	1.30289e-06	0.633721	-1.0388	1.30289e-06	0.762346	-0.63199	1.30289e-06	0.350098	-1.0055	1.30289e-06	0.614962	-0.53319	1.30289e-06	1.08938
UQCRQ	-0.395	1.30289e-06	0.435751	-0.30407	1.30289e-06	0.210867	-1.1789	1.30289e-06	1.84783	-0.51032	1.30289e-06	0.0635149	-0.50035	1.30289e-06	0.603504	0.00056408	1.30289e-06	1.30289e-06
SLX4	-1.0344	1.30289e-06	1.61663	-0.6093	1.30289e-06	0.357533	-1.6592	1.30289e-06	0.864565	-1.3064	1.30289e-06	1.23178	-0.97191	1.30289e-06	0.584414	-0.91109	1.30289e-06	0.732352
XRCC2	-0.092844	1.30289e-06	1.30289e-06	0.038497	1.30289e-06	1.30289e-06	-1.536	1.30289e-06	0.966504	-1.3688	1.30289e-06	0.405135	-0.79406	1.30289e-06	0.583323	-0.70109	1.30289e-06	0.673398
AC005195.1	-1.5597	1.30289e-06	1.30289e-06	-1.826	1.30289e-06	0.236697	-4.701	1.30289e-06	0.759918	-4.8046	1.30289e-06	0.685581	-4.3912	1.30289e-06	0.578417	-3.8685	1.30289e-06	0.667226
PPA2	-0.15371	1.30289e-06	1.30289e-06	-0.11976	1.30289e-06	1.30289e-06	-0.78453	1.30289e-06	1.5581	-1.055	1.30289e-06	1.72237	-0.60963	1.30289e-06	0.570802	-1.4942	1.30289e-06	1.1278
KRAS	-0.17943	1.30289e-06	1.30289e-06	-1.093	1.30289e-06	0.207161	-0.17559	1.30289e-06	1.30289e-06	-0.064135	1.30289e-06	1.30289e-06	-0.6946	1.30289e-06	0.56776	-0.11123	1.30289e-06	1.30289e-06
ORC2	-0.47909	1.30289e-06	0.943961	-0.17822	1.30289e-06	1.30289e-06	-0.41628	1.30289e-06	0.279168	0.28148	1.30289e-06	1.30289e-06	-0.28265	1.30289e-06	0.56776	-0.57118	1.30289e-06	0.737082
ERH	-2.5618	1.30289e-06	0.637237	-2.3322	1.30289e-06	0.688365	-2.6673	1.30289e-06	1.52863	-1.9935	1.30289e-06	1.30358	-2.919	1.30289e-06	0.554029	-1.9096	1.30289e-06	0.546307
CHST9	-0.046943	1.30289e-06	1.30289e-06	0.28533	1.30289e-06	1.30289e-06	-0.044785	1.30289e-06	1.30289e-06	0.07184	1.30289e-06	1.30289e-06	-0.65958	1.30289e-06	0.550472	-0.14226	1.30289e-06	1.30289e-06
PDE4DIP	-0.96432	1.30289e-06	0.672629	-1.4851	1.30289e-06	0.980934	-0.91721	1.30289e-06	0.25454	-1.1848	1.30289e-06	0.229135	-0.62747	1.30289e-06	0.546806	-0.67679	1.30289e-06	0.266815
FDPS	-3.3593	1.30289e-06	1.19413	-0.47328	1.30289e-06	1.30289e-06	-2.4942	1.30289e-06	0.757958	-1.5043	1.30289e-06	0.448276	-1.4104	1.30289e-06	0.527482	-0.40299	1.30289e-06	0.332122
AL121652.1	-0.34821	1.30289e-06	1.30289e-06	-0.2054	1.30289e-06	1.30289e-06	-1.3033	1.30289e-06	0.262365	-1.6345	1.30289e-06	0.249321	-1.5758	1.30289e-06	0.523076	-1.9659	1.30289e-06	0.543054
KXD1	-0.41461	1.30289e-06	0.213225	-0.77024	1.30289e-06	0.0675201	-0.25138	1.30289e-06	1.30289e-06	-0.31345	1.30289e-06	0.0769006	-0.77146	1.30289e-06	0.499224	0.0091498	1.30289e-06	1.30289e-06
CCDC12	0.10901	1.30289e-06	1.30289e-06	-0.1958	1.30289e-06	1.30289e-06	-0.58831	1.30289e-06	1.12728	-0.9481	1.30289e-06	0.947095	-0.5269	1.30289e-06	0.495309	-0.58905	1.30289e-06	0.371116
MRPS35	-0.45302	1.30289e-06	1.30289e-06	0.19038	1.30289e-06	1.30289e-06	-0.93578	1.30289e-06	1.47468	-1.0953	1.30289e-06	0.235532	-0.69653	1.30289e-06	0.495309	-0.22511	1.30289e-06	1.30289e-06
NUDT17	-0.065602	1.30289e-06	1.30289e-06	0.11018	1.30289e-06	1.30289e-06	-0.20655	1.30289e-06	1.30289e-06	-0.76715	1.30289e-06	1.04209	-0.56988	1.30289e-06	0.491278	-0.24739	1.30289e-06	1.30289e-06
PSME3	-0.34879	1.30289e-06	0.214418	-0.33185	1.30289e-06	1.30289e-06	-0.37095	1.30289e-06	0.392412	-0.14979	1.30289e-06	1.30289e-06	-0.88066	1.30289e-06	0.477926	-0.34319	1.30289e-06	1.30289e-06
PIGH	-0.6299	1.30289e-06	0.735503	-0.16333	1.30289e-06	1.30289e-06	-0.277	1.30289e-06	1.30289e-06	-0.24843	1.30289e-06	0.216703	-0.78893	1.30289e-06	0.464308	-0.49702	1.30289e-06	1.04401
MYRF	-0.46487	1.30289e-06	0.299713	-1.0313	1.30289e-06	0.976665	-0.10172	1.30289e-06	1.30289e-06	-0.3379	1.30289e-06	0.18174	-0.48062	1.30289e-06	0.464308	-0.20089	1.30289e-06	0.236821
TRAPPC2L	0.044234	1.30289e-06	1.30289e-06	-0.49588	1.30289e-06	0.0592938	-0.36221	1.30289e-06	0.258195	-0.2395	1.30289e-06	0.171176	-0.45972	1.30289e-06	0.426076	-0.87868	1.30289e-06	0.737082
NUP107	-0.79155	1.30289e-06	1.8629	-1.8055	1.30289e-06	2.28668	-1.2034	1.30289e-06	1.38005	-1.3526	1.30289e-06	1.72237	-1.1325	1.30289e-06	0.402709	-0.44428	1.30289e-06	1.49819
FAM72B	-1.1365	1.30289e-06	0.816209	-0.48306	1.30289e-06	0.106265	-0.53916	1.30289e-06	0.119126	-1.5989	1.30289e-06	0.350098	-0.61502	1.30289e-06	0.402572	-0.64138	1.30289e-06	0.0594691
MUS81	-0.80212	1.30289e-06	1.32996	-1.0034	1.30289e-06	1.25222	-1.2499	1.30289e-06	0.474148	-0.74636	1.30289e-06	1.0564	-0.383	1.30289e-06	0.384049	-0.56502	1.30289e-06	1.30688
RP11-400F19.8	-0.68814	1.30289e-06	0.461533	-0.34866	1.30289e-06	1.30289e-06	-0.67002	1.30289e-06	0.0118394	-0.58393	1.30289e-06	0.0021791	-1.2249	1.30289e-06	0.384049	-0.5852	1.30289e-06	0.257327
TRNAI2	-0.072081	1.30289e-06	0.289713	-0.15685	1.30289e-06	0.372812	-0.27065	1.30289e-06	0.364832	-0.052652	1.30289e-06	0.403039	-0.039078	1.30289e-06	0.377643	-0.45114	1.30289e-06	0.400201
KRTCAP2	-0.66049	1.30289e-06	0.937219	-0.80882	1.30289e-06	1.0096	-0.43648	1.30289e-06	0.271553	-0.39284	1.30289e-06	1.30289e-06	-0.77594	1.30289e-06	0.375109	-0.55288	1.30289e-06	0.486372
AC144573.1	-3.736	1.30289e-06	0.285331	-3.4394	1.30289e-06	0.222666	-6.386	1.30289e-06	0.36286	-6.0478	1.30289e-06	0.395639	-4.4739	1.30289e-06	0.372371	-3.5967	1.30289e-06	0.35216
TRIM46	-0.32024	1.30289e-06	1.30289e-06	-0.52724	1.30289e-06	1.30289e-06	-0.23714	1.30289e-06	0.184873	-0.72643	1.30289e-06	0.796638	-0.61083	1.30289e-06	0.366512	-0.22103	1.30289e-06	1.30289e-06
PALB2	0.018733	1.30289e-06	1.30289e-06	-0.066597	1.30289e-06	1.30289e-06	-0.62423	1.30289e-06	0.598076	-0.29657	1.30289e-06	0.77404	-0.40926	1.30289e-06	0.347946	-0.98018	1.30289e-06	0.154892
AZIN1	-0.31172	1.30289e-06	1.30289e-06	-0.61033	1.30289e-06	0.312846	-0.60491	1.30289e-06	0.803321	0.050067	1.30289e-06	1.30289e-06	-0.48406	1.30289e-06	0.323048	-0.53187	1.30289e-06	0.126424
RP11-29H23.4	-1.0264	1.30289e-06	0.550007	-1.4937	1.30289e-06	0.487536	-0.61205	1.30289e-06	0.123891	-1.5657	1.30289e-06	0.676245	-0.56066	1.30289e-06	0.318894	-0.85126	1.30289e-06	0.47874
TBC1D23	-0.14122	1.30289e-06	1.30289e-06	0.073351	1.30289e-06	1.30289e-06	0.1647	1.30289e-06	1.30289e-06	0.16562	1.30289e-06	1.30289e-06	-0.55054	1.30289e-06	0.31715	-0.096439	1.30289e-06	1.30289e-06
MRPS30	-1.3809	1.30289e-06	0.707135	-0.94257	1.30289e-06	0.292548	-1.5096	1.30289e-06	1.08634	-1.1814	1.30289e-06	0.295011	-0.5393	1.30289e-06	0.310854	-0.56592	1.30289e-06	0.402056
LRRC8B	-0.24748	1.30289e-06	1.30289e-06	0.080319	1.30289e-06	1.30289e-06	-0.19302	1.30289e-06	1.30289e-06	0.02622	1.30289e-06	1.30289e-06	-0.37127	1.30289e-06	0.286751	0.10423	1.30289e-06	1.30289e-06
PCNXL3	0.10129	1.30289e-06	1.30289e-06	-0.28304	1.30289e-06	0.162966	0.22705	1.30289e-06	1.30289e-06	-0.52783	1.30289e-06	0.205127	-0.39003	1.30289e-06	0.286751	-0.47111	1.30289e-06	0.456373
RP11-53O19.1	-0.039047	1.30289e-06	1.30289e-06	-0.56507	1.30289e-06	0.148785	-0.054471	1.30289e-06	1.30289e-06	-0.33915	1.30289e-06	1.30289e-06	-0.32044	1.30289e-06	0.282672	-0.11642	1.30289e-06	1.30289e-06
CTC-260F20.3	-0.4325	1.30289e-06	1.01058	-0.58764	1.30289e-06	0.0228244	-1.0319	1.30289e-06	1.45484	-0.76737	1.30289e-06	1.26537	-0.63692	1.30289e-06	0.282336	-0.81784	1.30289e-06	0.67251
BRF2	-1.6319	1.30289e-06	0.717906	-0.95317	1.30289e-06	1.00408	-1.0737	1.30289e-06	1.79116	-2.2316	1.30289e-06	2.16071	-0.59521	1.30289e-06	0.255121	-1.5854	1.30289e-06	1.08534
WARS2	-1.1356	1.30289e-06	1.18565	-0.82906	1.30289e-06	0.553822	-2.8923	1.30289e-06	1.84406	-0.8245	1.30289e-06	1.01525	-0.43022	1.30289e-06	0.255121	-0.63661	1.30289e-06	0.165607
RBM19	-1.1777	1.30289e-06	0.725974	-1.5982	1.30289e-06	0.823255	-0.85216	1.30289e-06	0.315389	-1.236	1.30289e-06	1.3217	-0.7336	1.30289e-06	0.255121	-1.5291	1.30289e-06	1.13696
NAPG	-0.75096	1.30289e-06	0.0840997	0.33076	1.30289e-06	1.30289e-06	-0.26916	1.30289e-06	1.30289e-06	0.013612	1.30289e-06	1.30289e-06	-1.1995	1.30289e-06	0.253666	-0.77568	1.30289e-06	0.836269
WDR61	-0.29866	1.30289e-06	1.30289e-06	-0.93433	1.30289e-06	1.75323	-1.7686	1.30289e-06	1.43335	-2.3068	1.30289e-06	2.05998	-1.0787	1.30289e-06	0.253666	-0.90991	1.30289e-06	0.272243
AC005037.2	-0.20934	1.30289e-06	1.30289e-06	0.1893	1.30289e-06	1.30289e-06	-0.72105	1.30289e-06	1.30289e-06	-0.020042	1.30289e-06	1.30289e-06	-0.86075	1.30289e-06	0.252945	-1.0721	1.30289e-06	0.47874
KCNK7	-0.15712	1.30289e-06	0.135585	-0.83031	1.30289e-06	0.239815	-0.30501	1.30289e-06	1.30289e-06	-0.15582	1.30289e-06	1.30289e-06	-0.55357	1.30289e-06	0.236402	0.032134	1.30289e-06	1.30289e-06
MRPL23	-1.7753	1.30289e-06	1.11909	-0.97352	1.30289e-06	0.890898	-2.2034	1.30289e-06	1.24433	-0.86382	1.30289e-06	0.638675	-0.46415	1.30289e-06	0.225468	-0.26163	1.30289e-06	1.30289e-06
ITGA10	-0.27259	1.30289e-06	1.30289e-06	-0.66546	1.30289e-06	0.327453	0.10521	1.30289e-06	1.30289e-06	-0.90949	1.30289e-06	0.685581	-0.40822	1.30289e-06	0.219565	0.17913	1.30289e-06	1.30289e-06
CTA-747E2.10	0.33358	1.30289e-06	1.30289e-06	0.088941	1.30289e-06	1.30289e-06	-0.34749	1.30289e-06	0.0147932	-0.36082	1.30289e-06	1.30289e-06	0.054798	1.30289e-06	0.18477	-0.31784	1.30289e-06	0.216731
GAR1	-0.39602	1.30289e-06	0.185423	-0.88063	1.30289e-06	1.36525	-0.56023	1.30289e-06	0.269569	-0.78294	1.30289e-06	0.958963	-1.1948	1.30289e-06	0.183272	-0.068094	1.30289e-06	1.30289e-06
AC008937.3	-0.8823	1.30289e-06	1.07805	-0.60007	1.30289e-06	0.215944	-0.6327	1.30289e-06	1.47649	-0.52833	1.30289e-06	0.782114	-0.3526	1.30289e-06	0.178007	-0.61783	1.30289e-06	0.652139
PHTF1	-0.40306	1.30289e-06	0.137356	-0.14814	1.30289e-06	1.30289e-06	-0.12559	1.30289e-06	1.30289e-06	-0.57948	1.30289e-06	0.577609	-0.32493	1.30289e-06	0.176079	-0.34341	1.30289e-06	0.192253
CASC21	-0.17798	1.30289e-06	1.30289e-06	-0.4184	1.30289e-06	0.18247	-0.35414	1.30289e-06	0.440055	-0.15016	1.30289e-06	1.30289e-06	-0.21141	1.30289e-06	0.150029	-0.44733	1.30289e-06	1.16346
RP11-408B11.2	-0.37915	1.30289e-06	0.242002	-0.44657	1.30289e-06	0.252323	0.42591	1.30289e-06	0.125086	-0.18836	1.30289e-06	0.170576	-0.48536	1.30289e-06	0.147488	-0.75212	1.30289e-06	0.415772
RNU6-342P	0.043637	1.30289e-06	0.251921	0.092117	1.30289e-06	1.30289e-06	0.047101	1.30289e-06	0.119141	0.20855	1.30289e-06	0.171176	0.12071	1.30289e-06	0.133817	0.28301	1.30289e-06	0.126424
RASA4	-0.51462	1.30289e-06	0.0867368	-0.76373	1.30289e-06	0.365264	-0.05846	1.30289e-06	1.30289e-06	0.3588	1.30289e-06	1.30289e-06	-0.26119	1.30289e-06	0.127558	-0.14885	1.30289e-06	1.30289e-06
HIST2H4B	-0.35467	1.30289e-06	0.183694	-0.84076	1.30289e-06	1.25222	-1.0206	1.30289e-06	0.35623	-0.37529	1.30289e-06	0.239589	-0.49347	1.30289e-06	0.125514	-0.70162	1.30289e-06	1.06569
ATP5I	-0.33266	1.30289e-06	1.30289e-06	-0.21708	1.30289e-06	1.30289e-06	-1.0804	1.30289e-06	1.21404	-1.1425	1.30289e-06	0.863631	-0.20979	1.30289e-06	0.120238	0.30627	1.30289e-06	1.30289e-06
CASC11	-0.056084	1.30289e-06	1.30289e-06	-0.36077	1.30289e-06	1.30289e-06	0.072974	1.30289e-06	1.30289e-06	-0.15581	1.30289e-06	1.30289e-06	-0.42989	1.30289e-06	0.116513	-0.16887	1.30289e-06	1.30289e-06
TRIR	-0.20035	1.30289e-06	0.229506	-0.41642	1.30289e-06	0.200006	-0.9428	1.30289e-06	1.65853	-1.0856	1.30289e-06	1.90441	-0.14041	1.30289e-06	0.111002	-0.39097	1.30289e-06	0.795742
CTD-2314G24.2	-0.14621	1.30289e-06	1.30289e-06	-0.11635	1.30289e-06	1.30289e-06	0.32074	1.30289e-06	1.30289e-06	0.11987	1.30289e-06	1.30289e-06	-0.54101	1.30289e-06	0.0949795	-0.030491	1.30289e-06	1.30289e-06
MRPL49	-0.14188	1.30289e-06	0.000869894	-0.1224	1.30289e-06	1.30289e-06	-1.3484	1.30289e-06	1.78468	-1.2313	1.30289e-06	1.09578	-0.26379	1.30289e-06	0.0907687	-0.19262	1.30289e-06	1.30289e-06
RNU6-1088P	-0.57303	1.30289e-06	0.000869894	0.18453	1.30289e-06	1.30289e-06	-0.38166	1.30289e-06	0.123891	-1.6681	1.30289e-06	1.10185	-0.7765	1.30289e-06	0.0825643	-0.83755	1.30289e-06	0.893962
MAPT	-0.084324	1.30289e-06	1.30289e-06	0.33464	1.30289e-06	1.30289e-06	-0.32232	1.30289e-06	1.30289e-06	0.00030713	1.30289e-06	1.30289e-06	-0.51253	1.30289e-06	0.0575004	0.16006	1.30289e-06	1.30289e-06
BORCS8	0.023526	1.30289e-06	1.30289e-06	-1.0226	1.30289e-06	0.0613132	-0.092169	1.30289e-06	1.30289e-06	-0.72124	1.30289e-06	0.517035	-0.29568	1.30289e-06	0.0559583	0.030921	1.30289e-06	1.30289e-06
ZNF322	-0.55797	1.30289e-06	0.865526	-0.40332	1.30289e-06	0.111027	-0.38598	1.30289e-06	0.275676	0.0031325	1.30289e-06	0.136384	-0.096707	1.30289e-06	0.0500638	-0.373	1.30289e-06	1.30289e-06
PXN-AS1	-0.34461	1.30289e-06	1.30289e-06	-0.27324	1.30289e-06	1.30289e-06	-0.14139	1.30289e-06	1.30289e-06	-0.33994	1.30289e-06	0.362994	-0.53002	1.30289e-06	0.0478995	0.14452	1.30289e-06	1.30289e-06
GDAP2	-0.14531	1.30289e-06	1.30289e-06	-0.028204	1.30289e-06	1.30289e-06	-0.0080015	1.30289e-06	1.30289e-06	-0.36546	1.30289e-06	0.716301	-0.16801	1.30289e-06	0.00324367	0.074427	1.30289e-06	1.30289e-06
NPM1	-0.18366	1.30289e-06	1.30289e-06	-0.90545	1.30289e-06	0.653148	-0.89562	1.30289e-06	0.268418	-0.50171	1.30289e-06	0.77814	-0.19889	1.30289e-06	1.30289e-06	-0.543	1.30289e-06	0.1237
RP11-123K19.1	0.32349	1.30289e-06	1.30289e-06	0.19889	1.30289e-06	1.30289e-06	0.012149	1.30289e-06	1.30289e-06	0.24532	1.30289e-06	1.30289e-06	-0.42499	1.30289e-06	1.30289e-06	-0.78497	1.30289e-06	0.126424
GTF2IRD2B	-0.35717	1.30289e-06	0.132252	-0.43264	1.30289e-06	0.133937	-0.15675	1.30289e-06	1.30289e-06	-0.44964	1.30289e-06	0.0735253	-0.47392	1.30289e-06	1.30289e-06	-0.1838	1.30289e-06	1.30289e-06
ZNF284	-0.44404	1.30289e-06	0.000314543	-0.39126	1.30289e-06	1.30289e-06	0.2029	1.30289e-06	1.30289e-06	0.085525	1.30289e-06	1.30289e-06	-0.53511	1.30289e-06	1.30289e-06	-0.098667	1.30289e-06	1.30289e-06
NDUFB3	-0.16835	1.30289e-06	0.0174384	-0.25167	1.30289e-06	1.30289e-06	-1.21	1.30289e-06	0.973904	0.15336	1.30289e-06	1.30289e-06	-0.18054	1.30289e-06	1.30289e-06	-0.086334	1.30289e-06	1.30289e-06
MIR5684	-0.62331	1.30289e-06	0.190301	-0.46832	1.30289e-06	0.0613132	-1.5591	1.30289e-06	0.315389	-1.6039	1.30289e-06	0.358178	-0.5508	1.30289e-06	1.30289e-06	-0.55556	1.30289e-06	1.30289e-06
SLC25A42	-0.4795	1.30289e-06	0.176305	0.068654	1.30289e-06	1.30289e-06	0.2952	1.30289e-06	1.30289e-06	0.13052	1.30289e-06	1.30289e-06	-0.28144	1.30289e-06	1.30289e-06	0.030422	1.30289e-06	1.30289e-06
PPM1N	-0.10881	1.30289e-06	1.30289e-06	-1.1328	1.30289e-06	0.142241	-0.27308	1.30289e-06	1.30289e-06	0.026886	1.30289e-06	1.30289e-06	-0.39237	1.30289e-06	1.30289e-06	-0.06009	1.30289e-06	1.30289e-06
MUC1	-0.21209	1.30289e-06	1.30289e-06	0.052061	1.30289e-06	1.30289e-06	-0.25517	1.30289e-06	1.30289e-06	-0.60307	1.30289e-06	0.0899383	-0.34884	1.30289e-06	1.30289e-06	0.087151	1.30289e-06	1.30289e-06
UBE2T	-1.0795	1.30289e-06	1.35998	-0.88546	1.30289e-06	2.26728	-0.84806	1.30289e-06	1.06208	-0.12599	1.30289e-06	0.142	-0.25383	1.30289e-06	1.30289e-06	-0.42889	1.30289e-06	0.143418
RNU1-106P	0.22783	1.30289e-06	1.30289e-06	0.22123	1.30289e-06	1.30289e-06	-0.69724	1.30289e-06	0.17212	-1.6459	1.30289e-06	1.24432	-0.3114	1.30289e-06	1.30289e-06	-0.20483	1.30289e-06	1.30289e-06
RASA4DP	-0.57814	1.30289e-06	0.132252	-0.0025097	1.30289e-06	1.30289e-06	-0.68438	1.30289e-06	0.364832	-0.51465	1.30289e-06	0.716301	-0.38324	1.30289e-06	1.30289e-06	0.34861	1.30289e-06	1.30289e-06
PINLYP	-0.0078577	1.30289e-06	1.30289e-06	-0.57148	1.30289e-06	1.30289e-06	0.30852	1.30289e-06	1.30289e-06	-0.24889	1.30289e-06	0.170576	-0.40011	1.30289e-06	1.30289e-06	0.1311	1.30289e-06	1.30289e-06
LIN54	-0.19609	1.30289e-06	0.00212978	-0.7444	1.30289e-06	0.83014	-0.36622	1.30289e-06	1.28091	-0.66569	1.30289e-06	1.77671	-0.29644	1.30289e-06	1.30289e-06	-0.096743	1.30289e-06	1.30289e-06
COA3	-1.5439	1.30289e-06	1.31732	-0.12107	1.30289e-06	1.30289e-06	-1.6222	1.30289e-06	1.05272	0.13517	1.30289e-06	1.30289e-06	-0.44139	1.30289e-06	1.30289e-06	0.30133	1.30289e-06	1.30289e-06
TSSK6	0.26931	1.30289e-06	1.30289e-06	0.24195	1.30289e-06	1.30289e-06	0.09162	1.30289e-06	1.30289e-06	-0.54568	1.30289e-06	0.00350672	-0.34559	1.30289e-06	1.30289e-06	0.081075	1.30289e-06	1.30289e-06
PTPN22	-0.24554	1.30289e-06	0.18717	-0.3677	1.30289e-06	1.30289e-06	0.25071	1.30289e-06	1.30289e-06	-0.21473	1.30289e-06	1.30289e-06	-0.19606	1.30289e-06	1.30289e-06	-0.41057	1.30289e-06	0.199004
LIX1L	-0.24843	1.30289e-06	1.30289e-06	-0.3726	1.30289e-06	1.30289e-06	0.46725	1.30289e-06	1.30289e-06	-0.38628	1.30289e-06	0.239203	-0.31573	1.30289e-06	1.30289e-06	-0.069127	1.30289e-06	1.30289e-06
HIST1H2BL	-0.57503	1.30289e-06	0.298096	-1.3718	1.30289e-06	0.272172	-1.2531	1.30289e-06	1.03952	-1.3233	1.30289e-06	1.11315	-0.30366	1.30289e-06	1.30289e-06	-0.45158	1.30289e-06	0.272243
SRFBP1	-0.47047	1.30289e-06	0.245868	-0.46567	1.30289e-06	0.0421931	-0.83638	1.30289e-06	0.270672	-0.77051	1.30289e-06	0.512163	-0.25455	1.30289e-06	1.30289e-06	-0.3951	1.30289e-06	1.30289e-06
SLC25A21-AS1	-0.2009	1.30289e-06	0.110074	-0.25648	1.30289e-06	0.133937	-0.097967	1.30289e-06	1.30289e-06	-0.17043	1.30289e-06	1.30289e-06	-0.18361	1.30289e-06	1.30289e-06	-0.11096	1.30289e-06	0.112126
BAZ1B	-0.50922	1.30289e-06	0.190301	-0.29928	1.30289e-06	1.30289e-06	0.24963	1.30289e-06	1.30289e-06	-0.48635	1.30289e-06	0.856233	-0.44588	1.30289e-06	1.30289e-06	-0.46184	1.30289e-06	0.117909
GADD45GIP1	-1.7471	1.30289e-06	1.11909	-1.1427	1.30289e-06	1.43995	-1.9702	1.30289e-06	1.52408	-0.90535	1.30289e-06	1.29076	-0.39697	1.30289e-06	1.30289e-06	-0.09493	1.30289e-06	1.30289e-06
SMIM7	-0.39001	1.30289e-06	0.264678	-0.0069894	1.30289e-06	1.30289e-06	0.045528	1.30289e-06	1.30289e-06	0.16704	1.30289e-06	1.30289e-06	-0.14485	1.30289e-06	1.30289e-06	0.33192	1.30289e-06	1.30289e-06
AKTIP	-0.24123	1.30289e-06	0.0232993	0.11598	1.30289e-06	1.30289e-06	0.1559	1.30289e-06	1.30289e-06	0.048088	1.30289e-06	1.30289e-06	-0.28425	1.30289e-06	1.30289e-06	-0.51788	1.30289e-06	0.00574137
GMIP	-0.027406	1.30289e-06	1.30289e-06	-0.26819	1.30289e-06	1.30289e-06	-0.20209	1.30289e-06	1.30289e-06	0.025247	1.30289e-06	1.30289e-06	0.34826	1.30289e-06	1.30289e-06	-0.20184	1.30289e-06	1.30289e-06
SURF1	-0.37161	1.30289e-06	0.0260279	-0.17333	1.30289e-06	0.108232	-0.46845	1.30289e-06	0.220462	0.048142	1.30289e-06	1.30289e-06	-0.30933	1.30289e-06	1.30289e-06	-0.37258	1.30289e-06	1.30289e-06
HS2ST1	-0.12756	1.30289e-06	1.30289e-06	-1.6377	1.30289e-06	1.0498	0.1158	1.30289e-06	1.30289e-06	-0.8856	1.30289e-06	1.5428	-0.41321	1.30289e-06	1.30289e-06	-0.20165	1.30289e-06	1.30289e-06
MUC2	-0.12312	1.30289e-06	1.30289e-06	0.10586	1.30289e-06	1.30289e-06	0.22508	1.30289e-06	1.30289e-06	-0.21357	1.30289e-06	1.30289e-06	-0.12964	1.30289e-06	1.30289e-06	0.13784	1.30289e-06	1.30289e-06
MYO9B	-0.31087	1.30289e-06	1.30289e-06	-0.18327	1.30289e-06	0.0613132	0.13939	1.30289e-06	1.30289e-06	-0.41905	1.30289e-06	1.30289e-06	-0.31588	1.30289e-06	1.30289e-06	-0.29096	1.30289e-06	0.126424
KLHL42	0.11417	1.30289e-06	1.30289e-06	-0.4769	1.30289e-06	0.0355777	0.13126	1.30289e-06	1.30289e-06	-0.16196	1.30289e-06	0.044081	-0.32219	1.30289e-06	1.30289e-06	-0.067332	1.30289e-06	1.30289e-06
AC084262.3	-0.00098779	1.30289e-06	0.195676	0.063963	1.30289e-06	0.187399	0.066722	1.30289e-06	0.109429	-0.28629	1.30289e-06	0.267201	-0.16638	1.30289e-06	1.30289e-06	-0.2363	1.30289e-06	1.30289e-06
AP005718.1	-0.2883	1.30289e-06	0.145897	-0.08405	1.30289e-06	0.0225787	-0.60199	1.30289e-06	0.233546	-1.0501	1.30289e-06	0.442015	-0.35076	1.30289e-06	1.30289e-06	-0.62395	1.30289e-06	0.117909
EWSR1	-0.5326	1.30289e-06	0.185423	-0.3723	1.30289e-06	0.0262507	-0.4222	1.30289e-06	0.560066	-1.4526	1.30289e-06	1.16311	-0.21092	1.30289e-06	1.30289e-06	-0.50256	1.30289e-06	1.12038
ZNF222	-0.36576	1.30289e-06	1.30289e-06	-0.29825	1.30289e-06	1.30289e-06	-0.32881	1.30289e-06	1.30289e-06	0.10944	1.30289e-06	0.293101	0.099529	1.30289e-06	1.30289e-06	-0.27825	1.30289e-06	1.30289e-06
RMND1	-0.64764	1.30289e-06	0.417835	0.13304	1.30289e-06	1.30289e-06	-1.2856	1.30289e-06	0.610933	-0.27781	1.30289e-06	0.0532162	-0.16309	1.30289e-06	1.30289e-06	0.16363	1.30289e-06	1.30289e-06
JAK1	0.099969	1.30289e-06	1.30289e-06	0.2303	1.30289e-06	1.30289e-06	-0.15217	1.30289e-06	1.30289e-06	-0.32581	1.30289e-06	0.216703	-0.2337	1.30289e-06	1.30289e-06	-0.20046	1.30289e-06	1.30289e-06
TRMU	-0.21834	1.30289e-06	1.30289e-06	-0.33913	1.30289e-06	0.115732	0.036859	1.30289e-06	1.30289e-06	-0.50931	1.30289e-06	0.452108	-0.15611	1.30289e-06	1.30289e-06	-0.10843	1.30289e-06	1.30289e-06
CD58	-0.50149	1.30289e-06	0.557912	-0.56762	1.30289e-06	0.423013	-0.0046862	1.30289e-06	1.30289e-06	-0.071784	1.30289e-06	1.30289e-06	-0.15288	1.30289e-06	1.30289e-06	-0.34631	1.30289e-06	0.175801
CTD-2012J19.3	0.33723	1.30289e-06	1.30289e-06	0.17413	1.30289e-06	1.30289e-06	0.077195	1.30289e-06	0.0625378	-0.62057	1.30289e-06	0.171176	0.10197	1.30289e-06	1.30289e-06	-0.11715	1.30289e-06	0.0936957
GATC	-0.34245	1.30289e-06	1.30289e-06	-0.41222	1.30289e-06	0.15838	-0.55512	1.30289e-06	0.188073	-0.058567	1.30289e-06	1.30289e-06	-0.31158	1.30289e-06	1.30289e-06	0.14355	1.30289e-06	1.30289e-06
PRUNE1	-0.33917	1.30289e-06	0.30999	-0.18153	1.30289e-06	0.0355777	0.063344	1.30289e-06	1.30289e-06	-0.65306	1.30289e-06	0.452108	-0.13722	1.30289e-06	1.30289e-06	-0.29158	1.30289e-06	1.30289e-06
MEF2B	-0.36954	1.30289e-06	1.30289e-06	0.092506	1.30289e-06	1.30289e-06	0.39032	1.30289e-06	0.0594203	-0.29478	1.30289e-06	0.620372	0.12641	1.30289e-06	1.30289e-06	0.2961	1.30289e-06	1.30289e-06
HFE2	-0.60915	1.30289e-06	0.689438	-0.84572	1.30289e-06	0.484958	-0.24668	1.30289e-06	1.30289e-06	-0.59721	1.30289e-06	0.103186	-0.10228	1.30289e-06	1.30289e-06	-0.1038	1.30289e-06	1.30289e-06
SCYL1	-0.74372	1.30289e-06	1.33539	-1.6685	1.30289e-06	1.8185	-0.49403	1.30289e-06	0.100885	-0.46893	1.30289e-06	0.20791	-0.27698	1.30289e-06	1.30289e-06	-0.55542	1.30289e-06	1.08735
RNU6-533P	0.25934	1.30289e-06	0.246588	0.39231	1.30289e-06	0.0133801	-0.18892	1.30289e-06	0.279168	-0.14913	1.30289e-06	0.417562	0.074655	1.30289e-06	1.30289e-06	-0.068089	1.30289e-06	0.0155402
GHSR	0.0019277	1.30289e-06	1.30289e-06	0.19051	1.30289e-06	1.30289e-06	0.023904	1.30289e-06	1.30289e-06	0.19407	1.30289e-06	1.30289e-06	0.56797	1.30289e-06	1.30289e-06	-0.3196	1.30289e-06	1.30289e-06
ZC3HC1	-0.61492	1.30289e-06	1.30289e-06	-1.1027	1.30289e-06	0.15628	-0.10942	1.30289e-06	1.30289e-06	-0.20412	1.30289e-06	1.30289e-06	-0.10423	1.30289e-06	1.30289e-06	-0.46769	1.30289e-06	0.640005
RBMXL1	-0.092423	1.30289e-06	1.30289e-06	0.088435	1.30289e-06	1.30289e-06	-0.46654	1.30289e-06	0.00213371	-0.12255	1.30289e-06	1.30289e-06	-0.19321	1.30289e-06	1.30289e-06	-0.53187	1.30289e-06	0.0514677
CMC1	-0.23868	1.30289e-06	1.30289e-06	-0.033372	1.30289e-06	1.30289e-06	-0.52396	1.30289e-06	0.140733	-0.24723	1.30289e-06	1.30289e-06	-0.12189	1.30289e-06	1.30289e-06	0.081858	1.30289e-06	1.30289e-06
AL441883.1	-0.3301	1.30289e-06	1.30289e-06	-0.47673	1.30289e-06	0.22546	-0.29685	1.30289e-06	1.30289e-06	-0.33021	1.30289e-06	0.188051	-0.16847	1.30289e-06	1.30289e-06	-0.063013	1.30289e-06	1.30289e-06
RP11-263K19.6	-0.30391	1.30289e-06	1.30289e-06	-0.029339	1.30289e-06	1.30289e-06	-0.26564	1.30289e-06	1.30289e-06	-0.3707	1.30289e-06	0.207402	-0.2231	1.30289e-06	1.30289e-06	-0.16724	1.30289e-06	1.30289e-06
SLC12A7	0.18689	1.30289e-06	1.30289e-06	0.24446	1.30289e-06	1.30289e-06	-0.19743	1.30289e-06	1.30289e-06	-0.15871	1.30289e-06	1.30289e-06	-0.21016	1.30289e-06	1.30289e-06	-0.061413	1.30289e-06	1.30289e-06
RP5-1039K5.16	-0.31591	1.30289e-06	1.30289e-06	-0.16989	1.30289e-06	1.30289e-06	-0.29491	1.30289e-06	1.30289e-06	-0.2021	1.30289e-06	0.23759	0.040557	1.30289e-06	1.30289e-06	-0.46925	1.30289e-06	0.0205158
RSBN1	0.13547	1.30289e-06	1.30289e-06	-0.15978	1.30289e-06	1.30289e-06	0.26269	1.30289e-06	1.30289e-06	-0.042594	1.30289e-06	1.30289e-06	-0.17037	1.30289e-06	1.30289e-06	0.22534	1.30289e-06	1.30289e-06
EFNA4	0.08934	1.30289e-06	1.30289e-06	-0.41523	1.30289e-06	0.195999	-0.093167	1.30289e-06	1.30289e-06	-0.67511	1.30289e-06	0.339057	-0.27713	1.30289e-06	1.30289e-06	-0.31469	1.30289e-06	0.153056
SSBP4	-0.056283	1.30289e-06	1.30289e-06	-0.039128	1.30289e-06	1.30289e-06	-0.15261	1.30289e-06	1.30289e-06	-0.64384	1.30289e-06	0.718006	-0.17511	1.30289e-06	1.30289e-06	-0.23153	1.30289e-06	1.30289e-06
GPBP1L1	-0.38121	1.30289e-06	1.30289e-06	-0.70252	1.30289e-06	1.37897	-0.079811	1.30289e-06	1.30289e-06	-0.15614	1.30289e-06	1.30289e-06	-0.094316	1.30289e-06	1.30289e-06	-0.57508	1.30289e-06	0.105823
CTD-2089N3.1	-0.31466	1.30289e-06	0.132252	-0.12323	1.30289e-06	1.30289e-06	-0.5151	1.30289e-06	0.177861	-0.085578	1.30289e-06	1.30289e-06	0.45704	1.30289e-06	1.30289e-06	-0.041528	1.30289e-06	1.30289e-06
MIR4690	0.13148	1.30289e-06	1.30289e-06	-0.46446	1.30289e-06	0.222666	-0.095291	1.30289e-06	1.30289e-06	-0.27514	1.30289e-06	1.30289e-06	-0.23352	1.30289e-06	1.30289e-06	0.22483	1.30289e-06	1.30289e-06
PPFIA1	-0.10063	1.30289e-06	1.30289e-06	-0.30685	1.30289e-06	0.142241	-0.034904	1.30289e-06	1.30289e-06	-0.14885	1.30289e-06	1.30289e-06	-0.21461	1.30289e-06	1.30289e-06	-0.12463	1.30289e-06	1.30289e-06
RP5-855D21.1	-0.1986	1.30289e-06	0.28643	-0.26807	1.30289e-06	0.208884	0.096363	1.30289e-06	1.30289e-06	0.052521	1.30289e-06	1.30289e-06	-0.11902	1.30289e-06	1.30289e-06	0.048657	1.30289e-06	1.30289e-06
RNU6-491P	-0.0042269	1.30289e-06	1.30289e-06	-0.055832	1.30289e-06	1.30289e-06	0.40806	1.30289e-06	1.30289e-06	0.098873	1.30289e-06	1.30289e-06	0.079988	1.30289e-06	1.30289e-06	0.071818	1.30289e-06	1.30289e-06
ANO8	-0.33976	1.30289e-06	0.285331	-0.43188	1.30289e-06	0.0312356	-0.22482	1.30289e-06	1.30289e-06	-0.21136	1.30289e-06	1.30289e-06	-0.15136	1.30289e-06	1.30289e-06	-0.23845	1.30289e-06	0.115794
RP11-770G2.5	-0.083944	1.30289e-06	1.30289e-06	-0.28972	1.30289e-06	1.30289e-06	0.063282	1.30289e-06	1.30289e-06	-0.51586	1.30289e-06	0.745805	-0.14401	1.30289e-06	1.30289e-06	-0.17785	1.30289e-06	1.30289e-06
NUPL2	0.058147	1.30289e-06	1.30289e-06	-1.284	1.30289e-06	0.501542	0.1519	1.30289e-06	1.30289e-06	-0.0024817	1.30289e-06	1.30289e-06	-0.1731	1.30289e-06	1.30289e-06	-0.65541	1.30289e-06	1.49543
CCDC87	0.10236	1.30289e-06	1.30289e-06	-0.11909	1.30289e-06	1.30289e-06	-0.095557	1.30289e-06	1.30289e-06	0.3852	1.30289e-06	1.30289e-06	0.17618	1.30289e-06	1.30289e-06	-0.44771	1.30289e-06	0.141797
RTN2	-0.040386	1.30289e-06	1.30289e-06	-0.52068	1.30289e-06	1.30289e-06	0.15333	1.30289e-06	1.30289e-06	0.0924	1.30289e-06	1.30289e-06	-0.24211	1.30289e-06	1.30289e-06	-0.19731	1.30289e-06	1.30289e-06
PPP4R3A	-0.68734	1.30289e-06	0.68207	-0.49101	1.30289e-06	0.377291	-0.59319	1.30289e-06	0.0594203	-0.57262	1.30289e-06	0.275129	-0.16696	1.30289e-06	1.30289e-06	-0.11559	1.30289e-06	1.30289e-06
HIST2H2AB	-0.35043	1.30289e-06	0.18717	-0.37409	1.30289e-06	1.30289e-06	-0.57697	1.30289e-06	1.30289e-06	-0.25647	1.30289e-06	0.143917	-0.07333	1.30289e-06	1.30289e-06	-0.26602	1.30289e-06	1.30289e-06
EPB41L4A	0.035328	1.30289e-06	1.30289e-06	0.11681	1.30289e-06	1.30289e-06	0.037148	1.30289e-06	1.30289e-06	0.10306	1.30289e-06	1.30289e-06	-0.10114	1.30289e-06	1.30289e-06	-0.47148	1.30289e-06	0.847803
FAM91A1	-0.057428	1.30289e-06	1.30289e-06	-0.29159	1.30289e-06	1.30289e-06	-0.39671	1.30289e-06	0.213277	-0.28554	1.30289e-06	0.00245592	-0.081712	1.30289e-06	1.30289e-06	-0.069633	1.30289e-06	1.30289e-06
CTD-2132N18.3	0.27755	1.30289e-06	1.30289e-06	0.52887	1.30289e-06	1.30289e-06	0.32421	1.30289e-06	1.30289e-06	0.48408	1.30289e-06	1.30289e-06	-0.30605	1.30289e-06	1.30289e-06	-0.04755	1.30289e-06	1.30289e-06
SNORD53	-0.38379	1.30289e-06	0.331242	-0.17417	1.30289e-06	1.30289e-06	-0.29824	1.30289e-06	1.30289e-06	0.083506	1.30289e-06	1.30289e-06	-0.19812	1.30289e-06	1.30289e-06	-0.25866	1.30289e-06	0.204164
AL590452.1	-0.42592	1.30289e-06	0.185423	-0.9541	1.30289e-06	0.868202	-0.07056	1.30289e-06	1.30289e-06	-0.36258	1.30289e-06	1.01282	-0.2193	1.30289e-06	1.30289e-06	-0.5144	1.30289e-06	1.17062
COQ2	-0.32111	1.30289e-06	0.213947	-0.15892	1.30289e-06	1.30289e-06	-1.7803	1.30289e-06	1.08026	-0.11962	1.30289e-06	1.30289e-06	-0.14188	1.30289e-06	1.30289e-06	-0.14909	1.30289e-06	1.30289e-06
SETD2	-1.1016	1.30289e-06	1.83911	-1.555	1.30289e-06	1.30941	-0.83446	1.30289e-06	0.139556	-0.50355	1.30289e-06	0.534534	-0.066678	1.30289e-06	1.30289e-06	-0.82097	1.30289e-06	1.16347
CTD-2521M24.5	-0.046613	1.30289e-06	1.30289e-06	0.25257	1.30289e-06	1.30289e-06	0.16375	1.30289e-06	1.30289e-06	-0.065296	1.30289e-06	1.30289e-06	-0.19867	1.30289e-06	1.30289e-06	0.042858	1.30289e-06	1.30289e-06
MAP3K11	-0.13839	1.30289e-06	1.30289e-06	0.33121	1.30289e-06	1.30289e-06	0.2618	1.30289e-06	1.30289e-06	-0.19999	1.30289e-06	0.155076	-0.16233	1.30289e-06	1.30289e-06	0.11451	1.30289e-06	1.30289e-06
THBS3	-0.42928	1.30289e-06	0.407294	-0.46214	1.30289e-06	0.763831	-0.38208	1.30289e-06	1.30289e-06	-0.18317	1.30289e-06	1.30289e-06	0.11881	1.30289e-06	1.30289e-06	0.16743	1.30289e-06	1.30289e-06
HSF2	-0.22553	1.30289e-06	1.30289e-06	0.25634	1.30289e-06	1.30289e-06	0.058283	1.30289e-06	1.30289e-06	0.12024	1.30289e-06	1.30289e-06	-0.11318	1.30289e-06	1.30289e-06	-0.37693	1.30289e-06	1.02522
FTO	-0.58637	1.30289e-06	0.314901	-0.43315	1.30289e-06	0.142241	-0.35139	1.30289e-06	1.30289e-06	0.069777	1.30289e-06	1.30289e-06	-0.24045	1.30289e-06	1.30289e-06	-0.15239	1.30289e-06	1.30289e-06
HAPLN4	-0.46455	1.30289e-06	1.30289e-06	0.15225	1.30289e-06	1.30289e-06	-0.018922	1.30289e-06	1.30289e-06	-0.44861	1.30289e-06	0.301404	-0.15261	1.30289e-06	1.30289e-06	-0.054573	1.30289e-06	1.30289e-06
SNX32	0.00043881	1.30289e-06	1.30289e-06	-0.068182	1.30289e-06	1.30289e-06	-0.051071	1.30289e-06	1.30289e-06	-0.75103	1.30289e-06	0.384597	0.1586	1.30289e-06	1.30289e-06	-0.083438	1.30289e-06	1.30289e-06
CLEC18A	0.084768	1.30289e-06	1.30289e-06	-0.2212	1.30289e-06	1.30289e-06	-0.97234	1.30289e-06	1.22826	0.1436	1.30289e-06	1.30289e-06	0.069278	1.30289e-06	1.30289e-06	-0.015847	1.30289e-06	1.30289e-06
CPOX	-0.18462	1.30289e-06	1.30289e-06	0.018902	1.30289e-06	1.30289e-06	-0.28319	1.30289e-06	1.30289e-06	-0.11125	1.30289e-06	1.30289e-06	0.029037	1.30289e-06	1.30289e-06	-0.055858	1.30289e-06	1.30289e-06
LRRD1	-0.17695	1.30289e-06	1.30289e-06	0.25331	1.30289e-06	1.30289e-06	0.48693	1.30289e-06	1.30289e-06	0.012723	1.30289e-06	1.30289e-06	-0.012396	1.30289e-06	1.30289e-06	0.32765	1.30289e-06	1.30289e-06
SCARNA4	-0.051024	1.30289e-06	1.30289e-06	-0.45689	1.30289e-06	1.30289e-06	0.088762	1.30289e-06	1.30289e-06	-0.32153	1.30289e-06	0.731452	0.17708	1.30289e-06	1.30289e-06	-0.20553	1.30289e-06	1.30289e-06
DDAH1	-0.68602	1.30289e-06	1.11909	-0.55673	1.30289e-06	0.377291	-0.050985	1.30289e-06	1.30289e-06	-0.25319	1.30289e-06	1.30289e-06	-0.0042599	1.30289e-06	1.30289e-06	-0.28626	1.30289e-06	1.30289e-06
CTD-2265O21.3	-0.43286	1.30289e-06	0.316136	0.082257	1.30289e-06	1.30289e-06	0.12036	1.30289e-06	1.30289e-06	-0.56383	1.30289e-06	1.30289e-06	-0.13369	1.30289e-06	1.30289e-06	-0.0090102	1.30289e-06	1.30289e-06
CEND1	-0.10977	1.30289e-06	1.30289e-06	-0.87819	1.30289e-06	0.312846	-0.27186	1.30289e-06	0.252291	-0.93917	1.30289e-06	1.13184	0.2598	1.30289e-06	1.30289e-06	0.30072	1.30289e-06	1.30289e-06
CKMT2	-0.15379	1.30289e-06	1.30289e-06	0.045618	1.30289e-06	1.30289e-06	0.038523	1.30289e-06	1.30289e-06	-0.02387	1.30289e-06	1.30289e-06	-0.12535	1.30289e-06	1.30289e-06	-0.021559	1.30289e-06	1.30289e-06
ATM	0.086728	1.30289e-06	1.30289e-06	-0.13653	1.30289e-06	1.30289e-06	-1.2203	1.30289e-06	0.827844	-0.14141	1.30289e-06	1.30289e-06	0.013904	1.30289e-06	1.30289e-06	-0.026049	1.30289e-06	1.30289e-06
PDCD5	-0.34245	1.30289e-06	0.729694	-0.71877	1.30289e-06	0.858246	-0.1982	1.30289e-06	1.30289e-06	-1.3558	1.30289e-06	1.06528	-0.042992	1.30289e-06	1.30289e-06	-0.60095	1.30289e-06	0.737082
USP25	-0.15116	1.30289e-06	1.30289e-06	0.1221	1.30289e-06	0.0598647	-0.048338	1.30289e-06	1.30289e-06	0.17762	1.30289e-06	1.30289e-06	-0.10518	1.30289e-06	1.30289e-06	-0.4861	1.30289e-06	0.27864
CATSPER2	-0.18882	1.30289e-06	1.30289e-06	-0.42953	1.30289e-06	0.0785268	0.16127	1.30289e-06	1.30289e-06	0.053828	1.30289e-06	1.30289e-06	-0.0074304	1.30289e-06	1.30289e-06	0.18486	1.30289e-06	1.30289e-06
FSTL4	0.35073	1.30289e-06	1.30289e-06	-0.15636	1.30289e-06	1.30289e-06	0.16335	1.30289e-06	1.30289e-06	0.054659	1.30289e-06	1.30289e-06	0.076491	1.30289e-06	1.30289e-06	-0.255	1.30289e-06	0.105823
RNU2-17P	-0.49733	1.30289e-06	0.145897	-0.9415	1.30289e-06	0.159471	-0.29236	1.30289e-06	1.30289e-06	-0.14594	1.30289e-06	0.180762	0.18577	1.30289e-06	1.30289e-06	-0.17153	1.30289e-06	1.30289e-06
RN7SL706P	0.070701	1.30289e-06	1.30289e-06	-0.053571	1.30289e-06	1.30289e-06	-0.0040195	1.30289e-06	1.30289e-06	-0.10824	1.30289e-06	0.0690596	0.30914	1.30289e-06	1.30289e-06	0.040399	1.30289e-06	1.30289e-06
RP11-201K10.3	-0.31939	1.30289e-06	0.0232993	-0.47692	1.30289e-06	0.230976	-0.060505	1.30289e-06	1.30289e-06	-0.161	1.30289e-06	1.30289e-06	0.21026	1.30289e-06	1.30289e-06	0.14387	1.30289e-06	1.30289e-06
TBX3	0.029684	1.30289e-06	1.30289e-06	0.3137	1.30289e-06	1.30289e-06	-0.34061	1.30289e-06	1.30289e-06	0.30166	1.30289e-06	1.30289e-06	-0.19614	1.30289e-06	1.30289e-06	0.013171	1.30289e-06	1.30289e-06
TBX5	-0.38851	1.30289e-06	1.30289e-06	-0.0023638	1.30289e-06	1.30289e-06	-0.08696	1.30289e-06	1.30289e-06	-0.24501	1.30289e-06	1.30289e-06	-0.011347	1.30289e-06	1.30289e-06	-0.49981	1.30289e-06	0.127121
MIR4503	-0.56419	1.30289e-06	0.203727	-0.067846	1.30289e-06	1.30289e-06	-0.095709	1.30289e-06	1.30289e-06	-0.41561	1.30289e-06	0.143917	-0.044229	1.30289e-06	1.30289e-06	-0.16968	1.30289e-06	1.30289e-06
RANBP9	0.027266	1.30289e-06	1.30289e-06	0.24606	1.30289e-06	1.30289e-06	-0.56626	1.30289e-06	0.153352	-0.3915	1.30289e-06	0.851018	0.074019	1.30289e-06	1.30289e-06	-0.21223	1.30289e-06	0.154502
HMOX2	-0.14483	1.30289e-06	1.30289e-06	0.28198	1.30289e-06	1.30289e-06	-0.11818	1.30289e-06	1.30289e-06	-0.9029	1.30289e-06	1.62633	0.0068826	1.30289e-06	1.30289e-06	0.2417	1.30289e-06	1.30289e-06
C5orf15	-1.0897	1.30289e-06	0.314091	-0.30727	1.30289e-06	0.132699	-0.084615	1.30289e-06	1.30289e-06	-0.11164	1.30289e-06	1.30289e-06	0.0032974	1.30289e-06	1.30289e-06	-0.23561	1.30289e-06	1.30289e-06
TUBG2	-0.21041	1.30289e-06	1.30289e-06	0.21988	1.30289e-06	1.30289e-06	0.17958	1.30289e-06	1.30289e-06	0.31151	1.30289e-06	1.30289e-06	0.0061229	1.30289e-06	1.30289e-06	-0.23976	1.30289e-06	0.117417
ISYNA1	-0.15136	1.30289e-06	1.30289e-06	0.078573	1.30289e-06	1.30289e-06	-0.41172	1.30289e-06	0.258195	-0.26282	1.30289e-06	0.757391	-0.15386	1.30289e-06	1.30289e-06	0.35756	1.30289e-06	1.30289e-06
MLX	-0.65365	1.30289e-06	0.515128	0.23349	1.30289e-06	1.30289e-06	-0.11769	1.30289e-06	1.30289e-06	0.048518	1.30289e-06	1.30289e-06	-0.1366	1.30289e-06	1.30289e-06	-0.091021	1.30289e-06	1.30289e-06
FAM83A	-0.037687	1.30289e-06	1.30289e-06	0.51682	1.30289e-06	1.30289e-06	-0.53767	1.30289e-06	0.0186499	-0.20146	1.30289e-06	1.30289e-06	0.19968	1.30289e-06	1.30289e-06	-0.11042	1.30289e-06	1.30289e-06
POLR3G	0.038818	1.30289e-06	1.30289e-06	-0.085594	1.30289e-06	1.30289e-06	0.04373	1.30289e-06	1.30289e-06	0.26371	1.30289e-06	1.30289e-06	-0.029362	1.30289e-06	1.30289e-06	0.13211	1.30289e-06	1.30289e-06
CTC-239J10.1	-0.22459	1.30289e-06	1.30289e-06	0.01357	1.30289e-06	1.30289e-06	-0.60607	1.30289e-06	0.257011	-0.029232	1.30289e-06	1.30289e-06	0.48771	1.30289e-06	1.30289e-06	0.060105	1.30289e-06	1.30289e-06
PKLR	-0.13783	1.30289e-06	1.30289e-06	0.11664	1.30289e-06	1.30289e-06	-0.075242	1.30289e-06	1.30289e-06	-0.54207	1.30289e-06	0.782837	-0.096616	1.30289e-06	1.30289e-06	-0.26502	1.30289e-06	0.117909
MTMR11	-0.45285	1.30289e-06	0.399417	-0.41978	1.30289e-06	0.0516178	0.019407	1.30289e-06	1.30289e-06	-0.018828	1.30289e-06	1.30289e-06	0.0066817	1.30289e-06	1.30289e-06	-0.06579	1.30289e-06	1.30289e-06
CDC25A	-0.6684	1.30289e-06	0.0176976	-0.031434	1.30289e-06	1.30289e-06	0.15537	1.30289e-06	1.30289e-06	-0.010624	1.30289e-06	1.30289e-06	-0.0083525	1.30289e-06	1.30289e-06	0.069543	1.30289e-06	1.30289e-06
DNASE1	0.31418	1.30289e-06	1.30289e-06	-0.28816	1.30289e-06	0.13104	0.1502	1.30289e-06	1.30289e-06	-1.5843	1.30289e-06	2.14309	0.19844	1.30289e-06	1.30289e-06	0.18993	1.30289e-06	1.30289e-06
TRIM33	-0.41722	1.30289e-06	1.00844	0.15302	1.30289e-06	1.30289e-06	0.21141	1.30289e-06	1.30289e-06	0.068824	1.30289e-06	1.30289e-06	-0.045177	1.30289e-06	1.30289e-06	0.11695	1.30289e-06	1.30289e-06
CD160	-0.24551	1.30289e-06	1.30289e-06	0.25895	1.30289e-06	1.30289e-06	0.1388	1.30289e-06	1.30289e-06	-0.35892	1.30289e-06	0.38788	0.023204	1.30289e-06	1.30289e-06	-0.29737	1.30289e-06	1.30289e-06
MIR331	-0.020218	1.30289e-06	1.30289e-06	-0.38307	1.30289e-06	0.0613132	-0.18448	1.30289e-06	0.247786	-0.29279	1.30289e-06	0.044081	-0.11873	1.30289e-06	1.30289e-06	-0.12185	1.30289e-06	1.30289e-06
AL021546.6	-0.91545	1.30289e-06	0.716812	-0.35215	1.30289e-06	1.30289e-06	-0.49941	1.30289e-06	0.491309	-0.88455	1.30289e-06	0.806472	0.099112	1.30289e-06	1.30289e-06	0.3069	1.30289e-06	1.30289e-06
FBLN5	0.042711	1.30289e-06	1.30289e-06	-0.05392	1.30289e-06	1.30289e-06	0.051674	1.30289e-06	1.30289e-06	0.064074	1.30289e-06	1.30289e-06	-0.13337	1.30289e-06	1.30289e-06	-0.075072	1.30289e-06	1.30289e-06
ANKRD34A	-0.60822	1.30289e-06	0.881305	-0.55635	1.30289e-06	0.111027	-0.13067	1.30289e-06	1.30289e-06	-0.29389	1.30289e-06	0.203105	0.14205	1.30289e-06	1.30289e-06	-0.0042191	1.30289e-06	1.30289e-06
HIST2H2BE	-0.3287	1.30289e-06	1.30289e-06	-0.21489	1.30289e-06	1.30289e-06	-1.0592	1.30289e-06	0.741597	-0.97187	1.30289e-06	0.474682	-0.071188	1.30289e-06	1.30289e-06	-0.5066	1.30289e-06	0.41192
MIPOL1	0.022834	1.30289e-06	1.30289e-06	0.30482	1.30289e-06	1.30289e-06	0.13108	1.30289e-06	1.30289e-06	0.15243	1.30289e-06	1.30289e-06	0.13183	1.30289e-06	1.30289e-06	0.18199	1.30289e-06	1.30289e-06
CDK5RAP3	-0.067843	1.30289e-06	1.30289e-06	0.12219	1.30289e-06	1.30289e-06	0.0031569	1.30289e-06	1.30289e-06	-0.35568	1.30289e-06	0.650699	-0.0089289	1.30289e-06	1.30289e-06	-0.31265	1.30289e-06	0.123156
FAM46A	0.075886	1.30289e-06	1.30289e-06	0.45367	1.30289e-06	1.30289e-06	-0.084164	1.30289e-06	1.30289e-06	0.08948	1.30289e-06	1.30289e-06	0.040945	1.30289e-06	1.30289e-06	0.21554	1.30289e-06	1.30289e-06
DNASE2	-0.010869	1.30289e-06	1.30289e-06	-0.18463	1.30289e-06	1.30289e-06	-0.11907	1.30289e-06	1.30289e-06	-0.60844	1.30289e-06	0.209779	0.14973	1.30289e-06	1.30289e-06	-0.30975	1.30289e-06	1.30289e-06
GAL	0.26469	1.30289e-06	1.30289e-06	-0.063584	1.30289e-06	1.30289e-06	-0.01034	1.30289e-06	1.30289e-06	0.016278	1.30289e-06	1.30289e-06	0.20709	1.30289e-06	1.30289e-06	0.24291	1.30289e-06	1.30289e-06
ANP32E	0.071396	1.30289e-06	1.30289e-06	-0.17664	1.30289e-06	0.0563606	-0.49923	1.30289e-06	0.689538	-0.30534	1.30289e-06	1.30289e-06	0.089523	1.30289e-06	1.30289e-06	0.16151	1.30289e-06	1.30289e-06
RP11-458D21.1	-0.36055	1.30289e-06	0.20346	-0.036884	1.30289e-06	1.30289e-06	0.17115	1.30289e-06	1.30289e-06	-0.016955	1.30289e-06	1.30289e-06	0.22847	1.30289e-06	1.30289e-06	0.22407	1.30289e-06	1.30289e-06
RP5-855D21.2	0.084746	1.30289e-06	1.30289e-06	0.17954	1.30289e-06	1.30289e-06	0.301	1.30289e-06	1.30289e-06	0.27966	1.30289e-06	1.30289e-06	-0.16505	1.30289e-06	1.30289e-06	0.044453	1.30289e-06	1.30289e-06
RNF139	-0.038136	1.30289e-06	1.30289e-06	0.068544	1.30289e-06	1.30289e-06	-0.047025	1.30289e-06	1.30289e-06	0.25194	1.30289e-06	1.30289e-06	0.25912	1.30289e-06	1.30289e-06	0.020573	1.30289e-06	1.30289e-06
RP11-57H14.4	0.16192	1.30289e-06	1.30289e-06	-0.047799	1.30289e-06	1.30289e-06	0.21994	1.30289e-06	1.30289e-06	0.24396	1.30289e-06	1.30289e-06	0.32598	1.30289e-06	1.30289e-06	0.24274	1.30289e-06	1.30289e-06
ZFYVE26	-0.28118	1.30289e-06	0.211692	-0.10584	1.30289e-06	1.30289e-06	-0.26291	1.30289e-06	1.30289e-06	0.028943	1.30289e-06	1.30289e-06	0.17027	1.30289e-06	1.30289e-06	0.053168	1.30289e-06	1.30289e-06
RUSC1	0.1082	1.30289e-06	1.30289e-06	-0.60547	1.30289e-06	1.30289e-06	0.02398	1.30289e-06	1.30289e-06	-0.42638	1.30289e-06	0.398984	-0.035488	1.30289e-06	1.30289e-06	0.22915	1.30289e-06	1.30289e-06
FAM189B	0.10786	1.30289e-06	1.30289e-06	-0.52626	1.30289e-06	0.13104	-0.0072555	1.30289e-06	1.30289e-06	-0.23734	1.30289e-06	1.30289e-06	0.036737	1.30289e-06	1.30289e-06	0.13885	1.30289e-06	1.30289e-06
SIRT4	-0.10055	1.30289e-06	1.30289e-06	-0.18787	1.30289e-06	1.30289e-06	-0.19238	1.30289e-06	1.30289e-06	-0.43424	1.30289e-06	0.125139	-0.10694	1.30289e-06	1.30289e-06	0.24184	1.30289e-06	1.30289e-06
RP11-188D8.1	-0.13055	1.30289e-06	1.30289e-06	0.18336	1.30289e-06	1.30289e-06	-0.074257	1.30289e-06	1.30289e-06	-0.28741	1.30289e-06	0.250814	0.39968	1.30289e-06	1.30289e-06	-0.20453	1.30289e-06	1.30289e-06
RNASEH2C	-0.055462	1.30289e-06	1.30289e-06	0.14279	1.30289e-06	1.30289e-06	0.1184	1.30289e-06	1.30289e-06	-0.67308	1.30289e-06	0.52587	-0.058942	1.30289e-06	1.30289e-06	0.2095	1.30289e-06	1.30289e-06
RP11-103H7.5	-0.081185	1.30289e-06	1.30289e-06	-0.18627	1.30289e-06	1.30289e-06	0.088075	1.30289e-06	1.30289e-06	0.24515	1.30289e-06	1.30289e-06	-0.046633	1.30289e-06	1.30289e-06	0.10975	1.30289e-06	1.30289e-06
RP1-151F17.2	0.31058	1.30289e-06	1.30289e-06	-0.2414	1.30289e-06	1.30289e-06	0.043002	1.30289e-06	1.30289e-06	0.25415	1.30289e-06	1.30289e-06	0.20654	1.30289e-06	1.30289e-06	0.072915	1.30289e-06	1.30289e-06
AC004069.2	0.1889	1.30289e-06	1.30289e-06	-0.059072	1.30289e-06	1.30289e-06	-0.060019	1.30289e-06	1.30289e-06	0.095588	1.30289e-06	1.30289e-06	-0.095192	1.30289e-06	1.30289e-06	-0.083193	1.30289e-06	1.30289e-06
MANSC4	0.020192	1.30289e-06	1.30289e-06	0.17018	1.30289e-06	1.30289e-06	0.069115	1.30289e-06	1.30289e-06	-0.30791	1.30289e-06	0.216703	0.13008	1.30289e-06	1.30289e-06	0.087889	1.30289e-06	1.30289e-06
TP53BP1	-0.25074	1.30289e-06	1.30289e-06	0.24131	1.30289e-06	1.30289e-06	-0.60408	1.30289e-06	0.588441	-0.40506	1.30289e-06	0.364082	-0.065687	1.30289e-06	1.30289e-06	-0.37771	1.30289e-06	0.261702
LAMA2	-0.22816	1.30289e-06	1.30289e-06	0.35242	1.30289e-06	1.30289e-06	0.19891	1.30289e-06	1.30289e-06	0.20184	1.30289e-06	1.30289e-06	0.10311	1.30289e-06	1.30289e-06	-0.017228	1.30289e-06	1.30289e-06
BOLA1	-0.154	1.30289e-06	1.30289e-06	-0.78058	1.30289e-06	0.0947618	0.13403	1.30289e-06	1.30289e-06	-0.14527	1.30289e-06	1.30289e-06	0.052505	1.30289e-06	1.30289e-06	-0.013532	1.30289e-06	1.30289e-06
BICDL1	-0.40687	1.30289e-06	0.495313	-0.42169	1.30289e-06	0.0598647	-0.47727	1.30289e-06	0.0870328	-0.45601	1.30289e-06	0.259464	-0.028607	1.30289e-06	1.30289e-06	-0.20047	1.30289e-06	1.30289e-06
TMEM69	0.13911	1.30289e-06	1.30289e-06	-0.24739	1.30289e-06	1.30289e-06	0.23879	1.30289e-06	1.30289e-06	0.039261	1.30289e-06	1.30289e-06	0.35328	1.30289e-06	1.30289e-06	-0.43076	1.30289e-06	1.30289e-06
RAD54L	0.0060528	1.30289e-06	1.30289e-06	-0.33916	1.30289e-06	1.30289e-06	0.20542	1.30289e-06	1.30289e-06	-0.29721	1.30289e-06	1.30289e-06	0.18078	1.30289e-06	1.30289e-06	0.026348	1.30289e-06	1.30289e-06
MDC1	-0.29703	1.30289e-06	1.30289e-06	-0.18675	1.30289e-06	1.30289e-06	-0.036774	1.30289e-06	1.30289e-06	0.050013	1.30289e-06	1.30289e-06	-0.033698	1.30289e-06	1.30289e-06	-0.044069	1.30289e-06	1.30289e-06
CIART	-0.086543	1.30289e-06	1.30289e-06	-0.29943	1.30289e-06	0.078	-0.0077683	1.30289e-06	1.30289e-06	0.014024	1.30289e-06	1.30289e-06	0.030242	1.30289e-06	1.30289e-06	0.081336	1.30289e-06	1.30289e-06
RP11-54C4.1	0.27084	1.30289e-06	1.30289e-06	-0.13024	1.30289e-06	1.30289e-06	0.14863	1.30289e-06	1.30289e-06	0.25199	1.30289e-06	1.30289e-06	-0.065593	1.30289e-06	1.30289e-06	0.3233	1.30289e-06	1.30289e-06
RP11-536G4.1	-0.085167	1.30289e-06	1.30289e-06	0.49171	1.30289e-06	1.30289e-06	-0.16125	1.30289e-06	1.30289e-06	0.074357	1.30289e-06	1.30289e-06	0.29766	1.30289e-06	1.30289e-06	-0.17277	1.30289e-06	1.30289e-06
SIPA1	0.080204	1.30289e-06	1.30289e-06	-0.31053	1.30289e-06	0.136505	-0.12118	1.30289e-06	1.30289e-06	-0.17513	1.30289e-06	1.30289e-06	0.064898	1.30289e-06	1.30289e-06	-0.24688	1.30289e-06	1.30289e-06
MALAT1	0.16444	1.30289e-06	1.30289e-06	-0.44155	1.30289e-06	0.0372179	0.23375	1.30289e-06	1.30289e-06	-0.065914	1.30289e-06	1.30289e-06	0.18089	1.30289e-06	1.30289e-06	0.049175	1.30289e-06	1.30289e-06
NPHP3	-0.35763	1.30289e-06	0.20486	-0.42919	1.30289e-06	1.30289e-06	-0.23441	1.30289e-06	1.30289e-06	-0.21617	1.30289e-06	0.193338	0.31752	1.30289e-06	1.30289e-06	-0.40619	1.30289e-06	0.37964
ARMC6	-0.36805	1.30289e-06	1.30289e-06	0.02749	1.30289e-06	1.30289e-06	0.10011	1.30289e-06	1.30289e-06	-0.71921	1.30289e-06	1.30297	0.2213	1.30289e-06	1.30289e-06	-0.22119	1.30289e-06	0.166766
ATP6AP1L	0.33492	1.30289e-06	1.30289e-06	0.075825	1.30289e-06	1.30289e-06	0.053095	1.30289e-06	1.30289e-06	0.16569	1.30289e-06	1.30289e-06	0.16872	1.30289e-06	1.30289e-06	0.18982	1.30289e-06	1.30289e-06
CRHR1	-0.034179	1.30289e-06	1.30289e-06	0.24633	1.30289e-06	1.30289e-06	-0.37545	1.30289e-06	1.30289e-06	0.15105	1.30289e-06	1.30289e-06	0.13696	1.30289e-06	1.30289e-06	-0.11649	1.30289e-06	1.30289e-06
SLC4A7	-0.12774	1.30289e-06	1.30289e-06	0.11876	1.30289e-06	1.30289e-06	-0.53615	1.30289e-06	0.814194	-0.018911	1.30289e-06	1.30289e-06	0.0097836	1.30289e-06	1.30289e-06	0.081514	1.30289e-06	1.30289e-06
SUGP2	-0.32876	1.30289e-06	1.30289e-06	0.04004	1.30289e-06	1.30289e-06	-0.36039	1.30289e-06	1.30289e-06	-0.23005	1.30289e-06	0.135382	0.24272	1.30289e-06	1.30289e-06	-0.030906	1.30289e-06	1.30289e-06
PVT1	0.0095295	1.30289e-06	1.30289e-06	0.28743	1.30289e-06	1.30289e-06	-0.43555	1.30289e-06	0.0086729	-0.091493	1.30289e-06	1.30289e-06	0.095351	1.30289e-06	1.30289e-06	-0.171	1.30289e-06	1.30289e-06
RNPEP	0.25544	1.30289e-06	1.30289e-06	-0.22905	1.30289e-06	1.30289e-06	0.20483	1.30289e-06	1.30289e-06	-0.244	1.30289e-06	1.30289e-06	0.013198	1.30289e-06	1.30289e-06	-0.1922	1.30289e-06	0.117417
GBA	-0.1848	1.30289e-06	1.30289e-06	-0.2746	1.30289e-06	1.30289e-06	-0.088595	1.30289e-06	1.30289e-06	-0.056307	1.30289e-06	1.30289e-06	0.090022	1.30289e-06	1.30289e-06	0.023451	1.30289e-06	1.30289e-06
GTPBP3	-0.011259	1.30289e-06	1.30289e-06	0.15928	1.30289e-06	1.30289e-06	0.17776	1.30289e-06	1.30289e-06	-0.17842	1.30289e-06	1.30289e-06	0.17827	1.30289e-06	1.30289e-06	-0.15483	1.30289e-06	1.30289e-06
YJEFN3	-0.22182	1.30289e-06	1.30289e-06	-0.23346	1.30289e-06	1.30289e-06	-0.21461	1.30289e-06	1.30289e-06	-0.49951	1.30289e-06	0.312126	-0.01862	1.30289e-06	1.30289e-06	-0.24101	1.30289e-06	1.30289e-06
DNAJC27-AS1	0.28479	1.30289e-06	1.30289e-06	-0.21932	1.30289e-06	1.30289e-06	0.053621	1.30289e-06	1.30289e-06	0.38249	1.30289e-06	1.30289e-06	0.26889	1.30289e-06	1.30289e-06	-0.29902	1.30289e-06	1.30289e-06
DAND5	-0.096338	1.30289e-06	1.30289e-06	-0.10178	1.30289e-06	1.30289e-06	0.1206	1.30289e-06	1.30289e-06	-0.41107	1.30289e-06	0.0377993	0.26111	1.30289e-06	1.30289e-06	0.22789	1.30289e-06	1.30289e-06
AKT1	-0.19301	1.30289e-06	1.30289e-06	0.22062	1.30289e-06	1.30289e-06	0.087744	1.30289e-06	1.30289e-06	-0.23033	1.30289e-06	0.143917	0.10174	1.30289e-06	1.30289e-06	0.15327	1.30289e-06	1.30289e-06
FAM84B	0.31586	1.30289e-06	1.30289e-06	-0.52989	1.30289e-06	0.142241	-0.024499	1.30289e-06	1.30289e-06	0.1364	1.30289e-06	1.30289e-06	0.44016	1.30289e-06	1.30289e-06	0.35182	1.30289e-06	1.30289e-06
PRKAB2	-0.33457	1.30289e-06	1.30289e-06	-0.88332	1.30289e-06	0.236697	-0.40891	1.30289e-06	0.0086729	0.099112	1.30289e-06	1.30289e-06	-0.031199	1.30289e-06	1.30289e-06	0.3343	1.30289e-06	1.30289e-06
OTUD7B	-0.3715	1.30289e-06	1.30289e-06	-0.81764	1.30289e-06	0.0173589	-0.156	1.30289e-06	1.30289e-06	-0.35093	1.30289e-06	0.775193	-0.04271	1.30289e-06	1.30289e-06	0.016462	1.30289e-06	1.30289e-06
CTB-3M24.3	0.13021	1.30289e-06	1.30289e-06	-0.064428	1.30289e-06	1.30289e-06	-0.11421	1.30289e-06	1.30289e-06	0.23372	1.30289e-06	1.30289e-06	0.11418	1.30289e-06	1.30289e-06	0.074691	1.30289e-06	1.30289e-06
GSTM4	-0.79288	1.30289e-06	0.505008	-0.21024	1.30289e-06	1.30289e-06	0.15933	1.30289e-06	1.30289e-06	-0.18591	1.30289e-06	0.154131	-0.049637	1.30289e-06	1.30289e-06	0.098969	1.30289e-06	1.30289e-06
PRICKLE2	-0.10775	1.30289e-06	1.30289e-06	-0.0037599	1.30289e-06	1.30289e-06	-0.11297	1.30289e-06	1.30289e-06	0.080198	1.30289e-06	1.30289e-06	0.0092656	1.30289e-06	1.30289e-06	0.016831	1.30289e-06	1.30289e-06
TBX5-AS1	-0.0069174	1.30289e-06	1.30289e-06	-0.32769	1.30289e-06	0.146652	-0.093652	1.30289e-06	1.30289e-06	0.23581	1.30289e-06	1.30289e-06	0.085295	1.30289e-06	1.30289e-06	-0.0016998	1.30289e-06	1.30289e-06
AC010646.3	-0.30124	1.30289e-06	1.30289e-06	0.49554	1.30289e-06	1.30289e-06	0.39295	1.30289e-06	1.30289e-06	-1.0539	1.30289e-06	0.172874	0.050102	1.30289e-06	1.30289e-06	0.23597	1.30289e-06	1.30289e-06
PTH1R	-0.29157	1.30289e-06	1.30289e-06	-0.22804	1.30289e-06	1.30289e-06	-0.069301	1.30289e-06	1.30289e-06	0.40338	1.30289e-06	1.30289e-06	0.15805	1.30289e-06	1.30289e-06	0.12432	1.30289e-06	1.30289e-06
KLHL5	0.021509	1.30289e-06	1.30289e-06	0.045873	1.30289e-06	1.30289e-06	-0.19518	1.30289e-06	0.10759	0.059725	1.30289e-06	1.30289e-06	0.16592	1.30289e-06	1.30289e-06	0.060766	1.30289e-06	1.30289e-06
CTD-2566J3.1	0.10561	1.30289e-06	1.30289e-06	0.13198	1.30289e-06	1.30289e-06	0.26891	1.30289e-06	1.30289e-06	0.10713	1.30289e-06	1.30289e-06	0.23354	1.30289e-06	1.30289e-06	-0.085555	1.30289e-06	1.30289e-06
ISL1	-0.13911	1.30289e-06	1.30289e-06	-0.78822	1.30289e-06	0.287594	0.21771	1.30289e-06	1.30289e-06	-0.0088413	1.30289e-06	1.30289e-06	0.18837	1.30289e-06	1.30289e-06	-0.14144	1.30289e-06	0.0963837
KCNH4	-0.21241	1.30289e-06	1.30289e-06	0.33028	1.30289e-06	1.30289e-06	-0.035965	1.30289e-06	1.30289e-06	0.062073	1.30289e-06	1.30289e-06	0.074145	1.30289e-06	1.30289e-06	0.034279	1.30289e-06	1.30289e-06
GPCPD1	-0.15977	1.30289e-06	1.30289e-06	-0.20592	1.30289e-06	1.30289e-06	-0.22444	1.30289e-06	1.30289e-06	0.32163	1.30289e-06	1.30289e-06	0.2881	1.30289e-06	1.30289e-06	-0.17856	1.30289e-06	1.30289e-06
RP11-757G1.6	0.067876	1.30289e-06	1.30289e-06	-0.26678	1.30289e-06	1.30289e-06	0.065321	1.30289e-06	1.30289e-06	-0.10225	1.30289e-06	1.30289e-06	0.24046	1.30289e-06	1.30289e-06	-0.19454	1.30289e-06	1.30289e-06
PLAUR	-0.25034	1.30289e-06	0.719763	0.16651	1.30289e-06	1.30289e-06	0.22008	1.30289e-06	1.30289e-06	-0.21865	1.30289e-06	0.0029458	0.11474	1.30289e-06	1.30289e-06	-0.40012	1.30289e-06	0.0155402
MARCH11_	0.36421	0.0290314	1.30289e-06	0.63741	0.123087	1.30289e-06	0.29243	0.159057	1.30289e-06	0.67378	0.436898	1.30289e-06	0.46517	0.425122	1.30289e-06	0.59542	0.143507	1.30289e-06
SEPT8_	0.21997	1.30289e-06	1.30289e-06	-0.18297	1.30289e-06	1.30289e-06	0.54926	0.0273145	1.30289e-06	-0.20986	1.30289e-06	1.30289e-06	0.25391	1.30289e-06	1.30289e-06	0.13878	0.0130738	1.30289e-06

## Sheet: MAGeCK_CRISPRko_3D
	HMLE			mesHMLE			B80_T17			B80_T5			K5+/K5-			K5+/K5+
Gene	Log2[Fold_Change]	POS | -Log10(FDR)	NEG | -Log10(FDR)	Log2[Fold_Change]	POS | -Log10(FDR)	NEG | -Log10(FDR)	Log2[Fold_Change]	POS | -Log10(FDR)	NEG | -Log10(FDR)	Log2[Fold_Change]	POS | -Log10(FDR)	NEG | -Log10(FDR)	Log2[Fold_Change]	POS | -Log10(FDR)	NEG | -Log10(FDR)	Log2[Fold_Change]	POS | -Log10(FDR)	NEG | -Log10(FDR)
NF2	0.12703	0	1.57871	4.9918	3.15058	0	5.0146	3.15058	0	1.8914	1.30055	0	7.4993	3.00436	0	4.6965	3.00436	0
PTEN	1.9025	1.13656	0	3.0237	3.15058	0	2.7093	2.25422	0	6.9173	3.08355	0	5.8963	3.00436	0	3.8639	3.00436	0
RIC8A	1.3427	0.244476	0	4.8588	3.15058	0	5.5478	3.15058	0	4.7721	3.08355	0	5.0334	3.00436	0	0.49838	0.0172432	0.541258
CREBBP	1.567	0.371241	0	2.372	3.15058	0	2.1597	3.15058	0	0.66894	0.0295197	0	4.9517	3.00436	0	2.0711	2.1962	0
RP11-245J9.4	-0.42059	0	0	1.6804	0.401768	0	1.3738	1.02029	0	0.38352	0	0	4.1153	1.55522	0	-0.23382	0	0.0156136
CUL5	2.7183	1.65214	0	1.5899	0.374374	0	1.3052	0.169016	0	3.0146	3.08355	0	3.9285	1.96956	0	2.5794	3.00436	0
EP300	0.15074	0	0	1.1374	0.304223	0	1.2609	1.03896	0	0.13002	0	0	3.8291	1.55522	0	2.3386	3.00436	0
PPM1N	-0.27481	0	0	0.46811	0	0.0277935	0.24872	0	0	-0.37332	0	0	3.5407	0.225266	0	0.017403	0	0
THOC7-AS1	-0.35982	0	0	0.7016	0.0920552	0	0.75735	0.255658	0	1.1742	0.103136	0	3.5116	0.399129	0	-0.50807	0	0.488734
MTHFD1L	0.37722	0.00213982	0	0.22268	0	0	0.5226	0	0	0.97567	0.0304508	0	3.384	0.225266	0	0.41503	0.162831	0
RNF7	0.72672	0.46951	0	0.74374	0	0	0.7709	0.00560145	0	2.2236	0.319337	0	3.3262	0.399129	0	2.7451	1.97798	0
RP1-151F17.1	0.18366	0	0	1.1131	0.271705	0	1.2833	0.566307	0	1.1825	0.197853	0	3.3181	0.111749	0	0.09158	0	0
DHX29	-1.1884	0	0.680769	4.1193	3.15058	0	4.6538	3.15058	0	-2.2349	0	0.469254	3.303	0.399129	0	0.51825	0.0172432	0.00683104
RBL2	0.042807	0	0	0.43478	0	0.0127866	0.72637	0.137573	0	0.41283	0	0	3.3003	0.399129	0	-0.30901	0	0
PXN-AS1	-0.35183	0	0	-0.23417	0	0.0127682	0.24773	0	0.00119639	0.59485	0	0	3.2646	0.225266	0.041567	-0.20205	0	0.117337
KB-1507C5.2	0.46854	0	0	1.234	0.315235	0	1.0844	0.137573	0	0.45311	0	0	3.2035	0.231822	0	0.78829	0.051389	0
CASP8	0.5269	0	0	0.81085	0.0676602	0.00477692	0.70469	0.145122	0	1.2314	0.170416	0	3.1984	0.870429	0	0.1002	0.0112101	0
PAX9	4.7335e-05	0	0	0.61039	0	0	1.0002	0.175652	0	0.79127	0	0	3.1981	0.0600327	0	1.004	0.426973	0
LIN54	-0.85227	0	0.381751	0.17761	0	0	0.21752	0	0.03161	-0.93931	0	0.171892	3.1567	0.225266	0	-0.15242	0	0
TGFBR2	-0.32498	0	0	1.0567	0.0343609	0	0.10891	0	0	1.5964	0.274656	0	3.1512	0.225266	0	1.0095	0.372062	0
CASC10	-0.26032	0	0	-0.015205	0	0	0.53065	0	0	-0.18742	0	0	3.1073	0.0626421	0	0.5527	0.0311595	0
PSORS1C1	1.5097	0.130963	0	-0.027299	0	0	0.34002	0	0	1.6306	0.507985	0	3.0942	0.283129	0	0.7814	0.721304	0
SLC37A3	-0.35451	0	0	0.070544	0	0	-0.24914	0	0	-0.01951	0	0	3.0884	0.231822	0	-0.10281	0.0112101	0
USP25	-0.13759	0	0	0.12508	0	0.101416	-0.037537	0	0.257558	0.5537	0.00376686	0	3.0251	0.0526893	0	-0.27737	0	0
COL26A1	-0.36622	0	0.048079	0.42665	0	0	0.58494	0	0	0.53752	0	0	3.0055	0.0526893	0	0.099349	0	0
CTD-2228K2.7	1.4036	0.244476	0	0.95579	0.374374	0	1.2527	1.03896	0	0.2445	0	0	3.0017	0.0600327	0	0.13211	0	0
GPR68	1.2706	0.23944	0	0.32135	0	0.00330843	0.52639	0	0	-0.51125	0	0	2.9886	0.0526893	0	0.27167	0.0044157	0
CYP51A1	-0.74253	0	0.751745	0.033384	0	0	-0.79996	0	0.369852	0.67902	0	0	2.9314	0.148791	0	0.03774	0	0
CARD10	1.098	0	0	0.60063	0	0	-0.051717	0	0	-0.88973	0	0.146577	2.9296	0.0526893	0	-0.14547	0	0
TALDO1	-1.3792	0	0.0830909	0.49754	0	0	0.3715	0	0	0.029545	0	0	2.9187	0.0526893	0	-0.041114	0	0
COL1A2	-0.37605	0	0	0.32498	0	0	0.43926	0	0	0.80219	0.000338882	0	2.9041	0.225266	0	0.15127	0	0
RAD51B	1.1151	0.086423	0	0.64959	0	0	0.58726	0	0	0.014815	0	0	2.9031	0.0526893	0	0.24241	0	0
ZNF93	-0.59543	0	0.0278958	1.1378	0	0	0.9769	0.00560145	0	0.32802	0.103136	0	2.8548	0.0486348	0	0.15234	0	0
RNF135	-0.20174	0	0	0.33122	0	0	0.48638	0	0.110808	1.2606	0.219915	0	2.852	0.0486348	0	0.46899	0.00960253	0
NUP107	-0.84906	0	0.546533	0.26683	0	0	-0.26177	0	0.141807	-1.7785	0	1.77565	2.7866	0.114786	0	-0.80793	0	1.26632
BAIAP2L2	0.10527	0	0	0.10262	0	0	0.33266	0	0	0.38359	0	0	2.7425	0.225266	0	0.024602	0	0
RP11-222K16.2	0.094504	0	0	0.31493	0.0102762	0	0.56413	0	0	-0.55793	0.211697	0	2.7205	0.175733	0	0.66445	0.147587	0
TFAP2A	0.24146	0	0	0.48396	0	0	0.65329	0.240196	0	1.6953	0.319337	0	2.6967	0.239887	0	1.4945	1.05159	0
RNU6-607P	0.75511	0.088304	0	0.86252	0.0391774	0.00188632	0.70181	0.115782	0.00119639	1.3135	0.435902	0	2.6583	0.169305	0	0.3899	0.162831	0
GATA3	0.043842	0	0	0.47475	0	0	0.2681	0	0	1.2426	0.24891	0	2.6488	0.225266	0	0.49886	0.0805495	0
TBX5-AS1	-0.026003	0	0	-0.083419	0	0	0.4267	0	0	-0.048016	0	0	2.6434	0.0526893	0	0.91551	0.426973	0
ISL1	-0.012436	0	0	0.043923	0	0.0017472	0.85814	0	0	0.34812	0	0	2.6341	0.0486348	0.0364832	0.38317	0.0297224	0
RASA4	-0.58571	0	0.203338	0.028794	0	0.0730256	0.52776	0	0.0868206	0.68753	0	0	2.6329	0.0526893	0	0.25233	0.146149	0
CLK1	0.43987	0.0912132	0	-0.16999	0	0	0.51172	0	0	-0.20899	0	0	2.6188	0.0486348	0	0.19121	0	0
AC105914.1	0.35176	0	0	0.52271	0	0	0.20864	0	0	0.93862	0.0357748	0	2.6115	0.0486348	0	0.56621	0.0688799	0
AC008940.1	-0.85363	0	0.041601	0.81223	0	0	-0.073146	0	0	0.80407	0.0321119	0	2.5988	0.0626421	0	0.16576	0	0
MIR4498	0.17887	0	0	1.1361	0	0	0.87651	0.0873088	0	-0.21315	0	0	2.5834	0.0626421	0	0.39156	0.110425	0
PLVAP	-0.58278	0.0912132	0.0339822	0.60235	0	0	0.60123	0	0	0.037766	0	0	2.5799	0.0600327	0	-0.20049	0	0
RASSF7	0.072248	0	0	0.25425	0	0	0.57017	0.056319	0	-0.46978	0	0	2.5734	0.142404	0	0.19222	0.0134293	0
RP11-150O12.5	1.3217	0.2869	0	0.47371	0	0	0.38467	0.137573	0	0.76929	0.0327989	0	2.5722	0.0486348	0	0.31403	0.0297224	0
SMAD4	0.66304	0	0	0.93504	0	0	0.64542	0	0	0.67837	0	0	2.5714	0.276152	0	1.3534	0.800848	0
HCG15	0.79235	0.165964	0	0.62531	0.129868	0	-0.017605	0	0	0.37749	0	0	2.5696	0.0600327	0	0.056825	0.0688799	0
GORASP2	0.17327	0	0	0.39503	0	0	0.17424	0	0	1.0736	0.0295197	0	2.548	0.225266	0	0.073134	0.0134293	0
FRY-AS1	0.18761	0	0	0.69603	0	0	0.53331	0	0	0.22781	0	0	2.5442	0.148791	0	0.1728	0.0112101	0
RP1-223E5.4	0.18035	0	0	0.24058	0	0	-0.11488	0	0	1.0059	0.00365385	0	2.5326	0.0600327	0	0.081144	0	0
PITPNB	1.3671	0.0912132	0	0.35496	0	0	0.093934	0	0.141807	0.54799	0	0	2.5214	0.0486348	0	-0.061619	0	0
STK11	0.793	0.0228281	0	0.1395	0	0	-0.036294	0	0.00809598	-0.60317	0	0.624543	2.5075	0.0486348	0	1.5557	1.05159	0
SLC25A17	0.71855	0	0	0.09578	0	0	0.20458	0	0	-0.034596	0	0	2.4978	0.0486348	0	0.1731	0.0095133	0
DNAL4	-0.18976	0	0	0.30856	0	0	0.039374	0	0	-1.8011	0	0.23392	2.4923	0.0120747	0	0.013381	0	0
TRIM4	0.72512	0	0	0.72065	0	0	0.50689	0	0	1.2662	0.00357502	0	2.4895	0.0486348	0	0.19221	0	0
MCHR1	1.1206	0.23944	0	0.36608	0	0	0.47316	0	0	-0.26635	0	0	2.4777	0.0486348	0	1.0927	1.05159	0
RP11-144G7.2	0.27065	0	0	0.1141	0	0.165577	0.24417	0	0	-0.34079	0	0	2.4773	0.0352644	0.0101806	0.61039	0.196956	0
JAZF1	-0.90749	0	0.252486	0.37902	0	0.0017472	0.51458	0	0	0.50828	0	0	2.4572	0.0486348	0	0.17426	0	0
BEST2	0.18208	0	0	-0.084385	0	0.038493	0.1223	0	0	-0.28318	0	0	2.4467	0.0486348	0	0.15317	0	0
AC026202.3	0.12096	0	0	0.056571	0	0.0398023	0.039063	0	0.00119639	1.4083	0.309367	0	2.4412	0.0486348	0	0.53504	0.0297224	0
NR2F6	-0.58452	0	0.25128	0.7158	0	0	0.33243	0	0	-0.42374	0	0.65952	2.4201	0.0486348	0	-0.029993	0	0
RP11-317O24.2	-0.38288	0	0.0551424	0.22348	0	0	0.0025624	0	0	0.83041	0	0	2.4152	0.0526893	0	0.10539	0	0
RP11-356O9.2	1.296	0.0912132	0	1.6303	0.115162	0	1.1097	0.0873088	0	1.0445	0.140174	0	2.4091	0.0486348	0	0.57867	0.0761138	0
SYNE1	0.59064	0.0317665	0	0.22029	0	0	0.92489	0	0	0.70339	0	0	2.3776	0.399129	0	-0.16582	0	0
MTX1	0.19583	0	0	-0.052961	0	0.0338357	-0.328	0	0	-0.061577	0.0357748	0	2.3773	0.0295443	0	0.5579	0.0112101	0
DLX1	0.11153	0	0	-0.15777	0	0.0268444	0.29333	0	0	0.52042	0.200551	0	2.3754	0.225266	0	0.18083	0	0
TMEM69	-1.296	0	0.229603	0.15873	0	0	-0.30566	0	0.00119639	-0.74646	0	0.285568	2.3732	0.0486348	0	-0.11403	0	0.0976729
CTD-2538G9.5	1.2777	0.115962	0	1.1013	0.105576	0	0.53731	0.175652	0	1.3848	0.219915	0	2.3633	0.0486348	0	0.25048	0	0
ANKIB1	-0.14024	0	0	0.54426	0	0	0.2453	0	0	0.26654	0	0	2.354	0.0600327	0	0.236	0.0535079	0
SP3	1.105	0.0912132	0	0.34082	0	0.117888	0.2725	0	0	0.65702	0.0267733	0	2.3537	0.399129	0	0.37243	0.0127656	0
MIR1915	0.65534	0.108731	0	0.59527	0	0	1.2042	0.115782	0	2.1492	0.319001	0	2.3412	0.0486348	0	0.37978	0.0283323	0
RP4-591N18.2	1.5884	0.0671327	0	-0.2076	0	0.0299108	0.32578	0	0	0.82365	0.0383222	0	2.3369	0.00416262	0	-0.06332	0	0
RP11-467J12.4	1.182	0.086423	0	0.95455	0.304223	0	0.57309	0.165265	0	0.86427	0.0445711	0	2.3335	0.0486348	0	0.1082	0	0
C21orf91	0.068299	0	0	0.030101	0	0	-0.045606	0	0	0.74128	0.0287891	0	2.3329	0.0600327	0	0.24853	0.0112101	0
EPS8L2	0.46625	0	0	0.31606	0	0	0.90781	0	0	0.19817	0	0	2.3306	0.0316329	0	1.1275	0.24183	0
RBM6	0.084829	0	0	-0.35972	0	0.109548	-0.044002	0	0	1.4913	0.24891	0	2.3276	0.0486348	0	0.3556	0.0714055	0
RNA5SP158	1.0497	0	0	1.0428	0.0442622	0.0522537	0.92153	0.137573	0	0.90937	0.103136	0	2.32	0.132472	0	0.20514	0.0162984	0
METTL8	0.13654	0	0	0.26555	0	0	-0.22732	0	0.0922389	1.1476	0.166263	0	2.3116	0.225266	0	-0.097685	0	0
ATF4	-0.95336	0	0.694535	0.48105	0.335784	0	0.091398	0	0	-1.0586	0	0.647293	2.3038	0.225266	0	1.0893	0.426973	0
RP11-89M20.2	0.075023	0	0	0.097807	0	0	0.051831	0	0.00119639	0.50029	0	0	2.2943	0.0486348	0	0.75934	0.158928	0
TRIP6	0.65366	0.0708765	0	0.00013902	0	0	0.75472	0	0	1.7436	0.295743	0	2.2883	0.0626421	0	0.93612	0.359724	0
ASCL2	-0.18428	0	0	0.23545	0	0	0.74752	0.137573	0	0.40377	0	0	2.287	0.0486348	0	0.6777	0.110425	0
C22orf31	0.27926	0	0	0.35578	0	0	0.30052	0	0	0.42115	0	0	2.2846	0.0526893	0	0.20263	0	0
SYT8	-0.0039783	0	0	0.3	0	0.0503124	0.088609	0	0	0.74478	0.00620678	0	2.2814	0.0486348	0	-0.028161	0	0
AL031594.1	-0.080159	0	0	0.030793	0	0.0500312	0.24828	0	0	-0.86366	0	0.321716	2.2762	0.0486348	0	0.075219	0	0
ELK3	-0.48306	0	0.131202	0.14466	0	0.0106966	0.19738	0	0	0.4872	0	0.00162949	2.2756	0.0486348	0	0.66997	0.0988938	0
RP11-14D22.1	1.162	0.0912132	0	1.2565	0	0	1.0275	0.307569	0	1.0071	0.00357502	0	2.2694	0.0486348	0	0.82759	0.196956	0
KLF4	0.71107	0	0	0.27993	0	0.0850606	0.64	0	0	0.52111	0	0	2.2683	0.0486348	0	0.15298	0	0
AKR1C4	0.95785	0.086423	0	0.8374	0.0391774	0	0.42186	0	0	1.6564	0.435902	0	2.2657	0.225266	0	-0.022051	0	0
ATXN7	0.15879	0	0	1.8132	2.30539	0	2.8828	3.15058	0	0.5037	0.0335096	0	2.2638	0.399129	0	0.29639	0.0760471	0
C11orf44	1.1006	0.244476	0	-0.090214	0	0	0.1985	0	0	0.22947	0	0	2.258	0.0235042	0	0.11841	0	0
CPLX1	0.32395	0	0	-0.13463	0	0.0017472	0.036505	0	0	0.33986	0	0	2.2562	0.0486348	0	0.58731	0.287049	0
ATP13A1	-0.047492	0	0	0.21871	0	0.0499015	-0.12054	0	0	-0.5608	0	0.226887	2.2455	0.00664711	0	0.011763	0	0
GCAT	-0.22335	0	0	0.2739	0	0	0.39925	0	0	1.112	0.103136	0	2.2435	0.239887	0	-0.051621	0	0
RP11-245J9.5	-0.099994	0	0	0.29877	0	0.109548	0.14649	0	0	1.6162	0.202274	0	2.2413	0.0486348	0	0.38777	0.0112101	0
CALR	-0.41736	0	0.248194	0.31821	0	0.102216	0.19788	0	0	0.46512	0.0228519	0	2.2394	0.0486348	0	0.063027	0	0
CCNF	0.70609	0	0	0.37848	0	0	0.55044	0	0	0.50181	0.202274	0	2.232	0.0600327	0	0.29767	0.0283323	0
SIRT4	-0.56435	0	0.333738	-0.21859	0	0.0481241	-0.010988	0	0	0.61558	0	0	2.2272	0.0486348	0	-0.12811	0	0
HIST1H2BD	-1.0223	0	0.493223	-0.15557	0	0.221758	0.40581	0	0	-0.28208	0	0	2.225	0.0486348	0	-0.18536	0	0
WNK4	0.21009	0	0	0.43685	0.128949	0	0.01922	0	0	1.0171	0.0432017	0	2.2162	0.0486348	0	0.4192	0.0095133	0
SLC25A12	0.090586	0	0	0.38736	0	0.00512351	0.47712	0	0	0.48195	0	0	2.2156	0.0526893	0	0.34074	0.0206451	0
TMEM237	-0.34223	0	0	-0.11072	0	0.00636188	0.16551	0	0	0.13613	0	0	2.2154	0.0486348	0	0.016346	0.0104603	0
IL2RA	-0.053785	0	0	0.21488	0	0	0.27747	0	0	-0.10774	0	0	2.2025	0.0266694	0	0.62846	0.162831	0
PILRB	-0.32122	0	0	0.070135	0	0	0.27321	0	0	0.35052	0	0	2.1998	0.0526893	0	0.73952	0.0535079	0
FBXW12	0.028842	0	0	0.10196	0	0	-0.3228	0	0.0306214	0.23661	0.103136	0	2.1988	0.0486348	0	0.52116	0.276814	0
AC004593.3	1.2126	0.122257	0	1.2165	0.401768	0	0.65531	0.512063	0	1.3852	0.219915	0	2.1966	0.0486348	0	0.39668	0.0297224	0
MEOX1	1.1823	0.0912132	0	0.43025	0	0.0268444	0.14867	0	0	0.56341	0	0	2.1737	0.0486348	0	0.27328	0.0162984	0
HNF4G	-0.38477	0	0.0660832	0.34885	0	0.0268444	0.066387	0	0	0.93575	0	0	2.1626	0.00416262	0	0.064898	0	0
CTD-3051D23.1	-0.15327	0	0	0.32425	0	0	0.16537	0	0	-0.80148	0	0	2.1619	0.00416262	0	0.44291	0.0300234	0
GRHL2	0.32682	0	0	0.67508	0.0102762	0	0.060032	0	0	1.1688	0.0740895	0	2.1585	0.0486348	0	0.62889	0.147587	0
SMARCAL1	1.3956	0.135457	0	0.37635	0	0	0.39584	0	0	0.26479	0.00900709	0	2.1544	0.0320217	0	0.064282	0	0
OPTC	-0.19959	0	0	0.105	0	0	0.11938	0	0	-0.53873	0	0	2.1531	0.0486348	0	-0.067128	0	0
AL512791.1	0.28881	0	0	0.80126	0	0	0.37816	0	0	0.26956	0	0	2.1515	0.0486348	0	0.54705	0.224902	0
PLEKHD1	0.26742	0	0	-0.039952	0	0	-0.24235	0	0	0.79905	0	0	2.1492	0.0486348	0	-0.090637	0	0
EDN1	0.78015	0.364859	0	-0.41353	0	0.236629	-0.17676	0	0	1.052	0.319001	0	2.1483	0.111749	0	0.57518	0.224902	0
KCNU1	0.034775	0	0	-0.59467	0	0.0797514	-0.20679	0	0	0.038874	0.254508	0	2.1472	0.00416262	0	0.34448	0	0
KCNJ4	0.62477	0.0082252	0	0.12202	0	0	0.4634	0	0	1.2977	0.0964542	0	2.1445	0.0486348	0	0.23526	0.0914678	0
MIR3199-2	0.93519	0	0	0.3347	0	0	0.81606	0.625923	0	1.17	0.0551192	0	2.1289	0.111749	0	0.17842	0	0
TAPBPL	1.659	0.0854733	0	0.074438	0	0	-0.30651	0	0.00895255	0.22122	0	0	2.1276	0.0295443	0	0.60203	0.18113	0
PHLDA3	-0.57563	0	0.204347	-0.054544	0	0	-0.032021	0	0	0.35637	0	0	2.1247	0.0486348	0	-0.056676	0.0688799	0
PODXL	1.0022	0.122497	0	0.59356	0.0768876	0	0.15047	0	0	-0.28133	0	0	2.1215	0.0526893	0	0.34956	0.0112101	0
GOT1L1	0.12902	0	0	0.027585	0	0	0.086342	0	0.106335	0.16901	0	0	2.1069	0.0486348	0	0.43183	0.0535079	0
RP13-20L14.1	1.2713	0.2869	0	0.55843	0.0442622	0	0.9485	0.625923	0	1.2388	0.307062	0	2.1028	0.0486348	0	-0.11724	0	0
SDC1	0.075577	0	0	0.28496	0	0	0.21724	0	0	1.0277	0.103136	0	2.1015	0.0600327	0	0.56051	0.0805495	0
CASKIN1	0.65795	0.0992779	0	-0.18082	0	0.0579532	0.69056	0	0	0.30385	0	0	2.098	0.00416262	0	-0.073434	0	0
GATAD1	0.34477	0	0	0.37958	0	0.10751	0.11404	0	0	1.5584	0.254508	0	2.0972	0.0600327	0	-0.072791	0	0
OTUD7B	-0.53555	0	0.0155294	0.34394	0	0.0271166	0.10016	0	0	0.76311	0	0	2.0939	0.0486348	0	0.46287	0.0112101	0
CSRP1	0.0002744	0	0	0.18305	0	0	0.44995	0	0	-0.69575	0	0	2.0922	0.00416262	0	-0.058448	0	0
HOMER3	0.56053	0	0	0.84676	0	0	-0.028473	0	0	1.6616	0.26435	0	2.0918	0.0486348	0	0.4196	0.0599225	0
OXLD1	0.39514	0	0	0.26955	0	0	0.13239	0	0	0.29989	0	0	2.0917	0.0526893	0	0.64002	0.100141	0
FANCC	-0.38461	0	0	-0.42637	0	0.129477	-0.3574	0	0.0176532	0.46777	0	0	2.0866	0.0526893	0	0.16224	0	0
CCDC88C	0.1188	0	0	-0.66232	0	0.138041	0.01537	0	0	-0.26314	0.0561357	0	2.0776	0.0120747	0	0.054751	0	0
LMO4	-0.5379	0	0.557655	0.03494	0	0	-0.26306	0	0	0.79298	0.170416	0	2.0767	0.0486348	0	0.21369	0.0914678	0
LNP1	0.44909	0	0	0.017534	0	0.00512351	0.38217	0	0	0.22959	0	0	2.066	0.0295443	0	0.3793	0.0044157	0
KLF1	0.19467	0	0	0.52483	0	0	0.10354	0	0	-0.11619	0	0	2.0645	0.0486348	0	0.27959	0	0
TRIL	0.0041995	0	0	0.65828	0	0	0.29369	0	0	0.80619	0	0	2.0611	0.0295443	0	0.052693	0	0
BTN2A1	0.15498	0	0	0.18283	0	0	-0.002068	0	0	1.1738	0.299706	0	2.0605	0.0526893	0	0.31788	0.0095133	0
AL590452.1	-0.59756	0	0.037419	0.24471	0	0.161325	0.28042	0	0.0138627	-0.5845	0	0	2.0599	0.00416262	0	-0.15385	0	0
RN7SL563P	0.90939	0.00782085	0	0.59436	0	0	0.84825	0	0	0.87095	0	0	2.0592	0.0526893	0	0.51811	0.0399718	0
CTD-2203A3.1	0.49869	0	0	0.62258	0	0	0.65296	0.169016	0	0.57886	0.0715529	0	2.053	0.0295443	0	0.39013	0.0781939	0
RAB3A	-0.32402	0	0	0.31947	0	0.0515494	0.22964	0	0.03161	0.59686	0	0	2.0503	0.00416262	0	0.37434	0.0172432	0
PRSS45	0.30915	0	0	-0.35674	0	0.10225	-0.38604	0	0.124656	1.0778	0.382051	0	2.049	0.00416262	0	0.41166	0.0615288	0
AC000032.2	0.30161	0	0	0.17258	0	0	0.63452	0.0873088	0	0.022749	0.135681	0	2.0482	0.0295443	0	-0.12825	0	0
SLC6A18	-0.77808	0	0.129518	0.21706	0	0	-0.036668	0	0	-2.0126	0	0.699944	2.0473	0.0235042	0	0.028109	0	0
AOX1	0.52062	0	0	-0.0025843	0	0	0.093103	0	0	0.1898	0	0	2.0455	0.0486348	0	0.48122	0.0112101	0
EZH1	0.072887	0	0	0.9198	0	0.10225	0.42573	0	0	1.8709	0.319001	0	2.0432	0.277517	0	0.51047	0.0162984	0
ERAP1	0.052175	0	0	-0.57154	0	0.248526	0.29361	0	0	-0.45459	0	0.104174	2.0427	0.00416262	0	0.17968	0	0
FILIP1L	-0.32338	0	0.0486805	0.13145	0	0	0.38432	0	0	1.1734	0.103136	0	2.0422	0.0526893	0	0.35233	0.0172775	0
RP11-218M22.1	0.72655	0.0912132	0	0.55955	0	0.101416	0.55743	0.175652	0	0.2125	0.103136	0	2.0409	0.0486348	0	0.093556	0.0172432	0
AC084262.3	-0.42183	0	0.15156	0.43697	0	0	0.38529	0	0.034297	-0.84677	0	0.387672	2.0404	0.0486348	0	-0.061812	0	0.0909631
ZBTB7B	0.635	0	0	0.13461	0	0	-0.13858	0	0	1.0535	0.0528772	0	2.0398	0.0171935	0	0.42268	0.0112101	0
BRMS1	-0.16061	0	0	0.085959	0	0	0.099192	0	0	-0.99746	0	0.122307	2.0388	0.399129	0	0.45541	0.0472899	0
AC000120.7	0.53996	0.0854733	0	0.10719	0	0.00653952	-0.031468	0	0	1.4417	0.103136	0	2.034	0.132472	0	0.13268	0.0112101	0
RP11-74C13.3	1.1167	0.139011	0	0.94342	0.0702394	0	0.89575	0	0	1.3194	0.219915	0	2.0257	0.0486348	0	0.46935	0.158928	0
FBXO32	0.12247	0	0	-0.44593	0	0.132966	-0.16824	0	0	0.7546	0	0	2.0237	0.0486348	0	0.67255	0.320492	0
JAK2	0.29052	0	0	0.4181	0	0.0390752	0.013643	0	0	0.42662	0	0	2.0227	0.0320217	0	0.29334	0.0317001	0
FGF10	0.27748	0	0	0.020972	0	0.00595706	0.50256	0	0	2.067	0.319337	0	2.0173	0.0295443	0	-0.15383	0.00159636	0
PLEKHF1	1.0337	0	0	-0.084437	0	0.016146	0.020058	0	0	-1.1432	0	0.150042	2.0164	0.00416262	0	-0.016316	0	0
C14orf159	0.016601	0	0	0.20081	0	0	0.16269	0	0	-0.38638	0.299706	0	2.0155	0.0486348	0	0.13505	0	0
IRF8	0.076096	0	0	-0.35346	0	0.0500312	0.2427	0	0	1.1453	0.254508	0	2.0154	0.0486348	0	0.42822	0.158928	0
CYP2D7	0.43674	0	0	0.36812	0	0	0.10389	0	0	0.71977	0	0	2.0125	0.0600327	0	0.44836	0.0134293	0
SLC25A21	0.028259	0.088304	0	0.13068	0	0	-0.063869	0	0	0.51389	0.06539	0	2.0117	0.399129	0	0.31922	0.196956	0
RNASEH2A	-0.012768	0	0	-0.0024343	0	0.0268444	-0.17947	0	0.03161	-1.449	0	1.95028	2.0113	0.0316329	0	0.087977	0	0
ADGRD2	1.8287	0.2869	0	0.081095	0	0.00636188	0.37305	0	0	0.84437	0	0	2.0066	0.0486348	0	0.28794	0.244576	0
PHTF1	-0.61375	0	0.16303	-0.16565	0	0.0268444	0.15436	0	0	-0.4637	0	0.175493	2.003	0.0486348	0	-0.10497	0	0
RP11-357N13.1	0.47086	0	0	0.28446	0	0	0.61861	0	0	1.0521	0.170416	0	1.9973	0.0486348	0	0.4516	0.044961	0
AC018816.3	-0.19127	0	0	1.322	0	0	1.2334	0.0753734	0	1.1215	0.103136	0	1.9972	0.0352644	0	0.48077	0.0283323	0
PPP1R9A	0.22549	0	0	0.031989	0	0	0.36962	0	0	-0.14141	0	0	1.9971	0.0486348	0	0.55026	0.224902	0
MCUR1	-0.15536	0	0	0.47575	0	0	0.35801	0	0	-0.13311	0	0	1.9969	0.0486348	0	0.30667	0.00960253	0
MKL1	0.57542	0	0	0.21324	0	0	0.64359	0	0	-0.36782	0	0	1.9968	0.0136915	0	0.044508	0	0
PEX14	0.1413	0	0	0.29776	0	0	-0.20398	0	0.00119639	-0.027704	0.0827529	0	1.9966	0.0486348	0	0.98021	0.115591	0
TMC4	0.045944	0	0	0.55867	0.0391774	0	0.69227	0	0	-0.022762	0	0	1.9959	0.399129	0	0.054045	0	0
HSPA13	0.57131	0	0	-0.0055694	0	0	0.16475	0	0	0.80561	0.314074	0	1.9959	0.0352644	0	0.5214	0.0688799	0
C11orf45	-0.072568	0	0	0.39957	0	0	0.54299	0.42941	0	0.28764	0	0	1.9949	0.0486348	0	0.22085	0.0112101	0
RP11-510D21.1	0.51361	0	0	0.34665	0	0	0.16385	0	0	1.1047	0.152663	0	1.9928	0.0486348	0	0.47011	0.0127656	0
RN7SKP11	0.53723	0	0	-0.27717	0	0.0880321	0.44417	0	0	0.37272	0.0097251	0	1.992	0.0316329	0	0.86088	0.248645	0
HEPACAM2	-0.27882	0	0	0.033229	0	0.00330843	-0.081384	0	0	0.19939	0	0	1.9902	0.0171935	0	0.86497	0.0914678	0
FIBP	-0.1297	0	0	0.4604	0	0	0.65297	0	0	0.5173	0	0	1.9855	0.231822	0	0.74324	0.250129	0
KREMEN1	0.412	0	0	-0.0029685	0	0.0835124	0.24322	0	0.172724	0.84074	0.00762324	0	1.985	0.0486348	0	0.51768	0.276814	0
CTLA4	-0.062238	0	0	0.61347	0	0	0.37273	0	0	-0.51617	0	0	1.9811	0.0486348	0	-0.40445	0	0
RP11-556I14.1	0.64482	0	0	0.67165	0	0	0.56094	0	0.00858341	1.0149	0	0	1.9788	0.0486348	0	0.51379	0.0914678	0
RP11-1060J15.4	1.0269	0.165964	0	1.5331	1.14648	0	1.3181	1.24983	0	0.82661	0.103136	0	1.9783	0.0316329	0	0.75548	0.250129	0
BRD9	-0.66233	0	0.149645	0.48667	0	0	0.19389	0	0	1.1759	0.219915	0	1.9761	0.0486348	0	0.36784	0	0
HAS2-AS1	0.22022	0	0	0.05389	0	0	-0.17946	0	0.013475	1.2129	0.382051	0	1.9679	0.0486348	0	0.44715	0.0112101	0
CASC9	0.45251	0	0	0.3584	0	0	0.2229	0	5.7765e-05	0.82924	0.0912941	0	1.9639	0.0486348	0	-0.074057	0	0
RP11-116N8.2	1.551	0.360984	0	1.5882	1.65214	0	1.2966	0.625923	0	1.7563	0.382051	0	1.9634	0.0526893	0	-0.16573	0	0
NKX2-8	-0.95979	0	0.0204257	0.077374	0	0	0.37037	0	0	0.31269	0.0509292	0	1.9613	0.0120747	0	0.27628	0	0
C1orf127	0.30195	0	0	-0.10129	0	0	-0.47411	0	0.0177903	0.19726	0	0	1.9612	0.0352644	0	0.14771	0	0
RFX1	0.81866	0.0912132	0	0.26569	0	0	0.074446	0	0	-0.22027	0	0	1.9603	0.0486348	0	0.049778	0	0
RP11-322N21.2	0.99943	0.108731	0	0.725	0	0.00830886	0.80277	0	0	1.1075	0.046262	0	1.9602	0.00416262	0	0.48062	0.196956	0
HIPK1	-0.43542	0	0	-0.14012	0	0.135784	0.074123	0	0	-0.076901	0	0	1.9578	0.0486348	0	0.47709	0.0805495	0
LINC01101	0.63003	0	0	0.28618	0	0	0.4375	0	0	-0.5555	0	0	1.9572	0.00416262	0	-0.41467	0	0.0186055
RP11-770G2.2	0.64472	0	0	1.2203	0.0391774	0	0.93752	0.137573	0	0.21537	0	0	1.9513	0.0486348	0	0.22244	0	0
OVOL1	0.83997	0.0285446	0	0.16874	0	0	0.33526	0	0	-0.728	0	0.311053	1.9464	0.0486348	0	0.51627	0.0134293	0
EVI2B	0.42959	0	0	-0.018104	0	0.0017472	-0.062119	0	0	1.2245	0.170416	0	1.9454	0.0600327	0	0.038809	0	0
MIR4298	0.41732	0	0	1.3956	0.0102762	0	1.5062	0.137573	0	-0.42317	0	0	1.9362	0.00416262	0	0.29348	0.0134293	0
RNU1-58P	1.2079	0.103899	0	0.70603	0.0292557	0	0.44732	0.175652	0	0.32861	0	0	1.9348	0.00364903	0	0.20668	0.0112101	0
AC005253.4	2.03	0.244476	0	0.65346	0	0	1.0042	0.591602	0	1.23	0.209298	0	1.9265	0.0486348	0	0.04679	0.0988938	0
LINC00092	-0.286	0	0	-0.21855	0	0.0797514	-0.12065	0	0	0.34396	0	0	1.9236	0.00364903	0	-0.0012159	0	0
CTB-5E10.3	-0.2346	0	0	0.12343	0	0	0.056136	0	0.00917162	0.62242	0.0316707	0	1.9188	0.00664711	0	0.38354	0.0718931	0
GSTM3	0.94058	0	0	0.092635	0	0	0.35916	0	0	-0.69747	0	0.387672	1.9151	0.0235042	0	0.15464	0.0134293	0
CBX4	-0.56851	0	0.67193	0.066331	0	0.00222668	0.083461	0	0.00232447	-0.26536	0.0949028	0	1.9126	0.00416262	0	0.095756	0	0
ANKLE1	0.5127	0	0	-0.15099	0	0	0.18951	0	0	0.17415	0	0	1.9123	0.00416262	0	0.62302	0.224902	0
RP11-110L15.1	1.397	0.215142	0	0.99653	0.287582	0	1.2117	0.128812	0	0.78096	0.254508	0	1.91	0.0486348	0	0.30802	0	0
CDH2	-0.10321	0	0	0.32766	0	0.0306596	0.31504	0	0	1.7374	0.527562	0	1.9059	0.0486348	0	0.80378	0.995472	0
CASP10	-0.37461	0	0	-0.5243	0	0.127237	0.16186	0	0	0.46757	0	0	1.9047	0.0295443	0	0.66834	0.117557	0
FAM208B	-0.13278	0	0	-0.68749	0	0.221556	0.20014	0	0	0.89174	0.211697	0	1.8987	0.0109789	0	0.13083	0	0
RP11-612A1.1	0.45278	0.0189379	0	-0.083817	0	0.0277935	-0.2238	0	0.0383051	1.4489	0.665983	0	1.8957	0.0295443	0	0.34246	0.110425	0
CHST9	-0.82044	0	0.457801	0.17169	0	0.0608538	-0.070619	0	0	0.45453	0	0	1.8895	0.0295443	0	-0.0097881	0	0
STRADB	-0.063628	0	0	-0.21426	0	0.104757	-0.55516	0	0.077233	1.8597	0.209664	0	1.8891	0.0486348	0	0.41642	0.0297224	0
MRPS30	-0.93092	0	0.477209	-0.26526	0	0.0175171	-0.53216	0	0.0383051	-1.0224	0	0.281595	1.8867	0.00416262	0	-0.20223	0	0
RP5-1073O3.2	0.6727	0	0	1.1246	0	0	0.90141	0.137573	0	0.86516	0	0	1.8865	0.0266694	0	0.35682	0.00759495	0
PRICKLE2-AS2	-0.09394	0	0	-0.1405	0	0	-0.0025842	0	0.0526619	0.93601	0.272573	0	1.8842	0.0526893	0	0.23876	0.0162984	0
FH	-0.44413	0	0	0.17244	0	0	0.35646	0	0.0200044	0.16717	0	0	1.8831	0.0486348	0	0.31301	0.0535079	0
SUDS3	1.7333	0	0.244481	0.16702	0	0	-0.39775	0	0.436978	-0.93189	0	1.28894	1.879	0.0482439	0	0.4657	0.143536	0
CPVL	-0.36377	0	0.0679978	-0.11097	0	0	0.36448	0	0	1.1914	0.209664	0	1.8719	0.0486348	0	0.42689	0.162831	0
RGS17	0.35672	0	0	0.22823	0	0.00222668	0.34466	0	0.188215	0.15392	0	0	1.8717	0.225266	0	0.90289	0.560334	0
RP11-863K10.7	0.55092	0	0	0.36619	0	0	0.41794	0	0	0.15976	0	0	1.8687	0.00416262	0	0.26536	0	0
[truncated: 1,726 more rows]

## Sheet: MAGeCK_CRISPRi_2D
	HMLE			mesHMLE			B80_T17			B80_T5			K5+/K5-			K5+/K5+
[truncated: 1,956 more rows]

[truncated: 8 more sheets: MAGeCK_CRISPRi_3D, MAGeCK_CRISPRa_2D, MAGeCK_CRISPRa_3D, MAGeCK_CRISPRko_in_vivo, MAGeCK_CRISPRa_in_vivo, MAGeCK_CRISPRko_DNA_Damage, MAGeCK_CRISPRi_DNA_Damage, MAGeCK_CRISPRa_DNA_Damage]
